# Supplementary material for: Machine learning-based correction for spin–orbit coupling effects in NMR chemical shift calculations
Source: Royal Society of Chemistry journal article supplement (doi:10.1039/d3cp05556f), 2024-01-01
Supplement: d3cp05556f3.xlsx [file d3cp05556f3.xlsx]

## Sheet: Structures
Dataset for ΔSO-ML NMR correction (Table S1)
				Number of HAs of the given element																	Relative r²SCAN-3c energy [kcal/mol]						Number of HAs of the given group
#	# 1H Nuclei	# 13C Nuclei	# Atoms	Zn	Cd	Hg	Ga	In	Tl	Ge	Sn	Pb	As	Sb	Bi	Se	Te	Cl	Br	I	0	1	2	3	Σ structures		group 12	group 13	group 14	group 15	group 16	group 17
1	3	1	5	0	0	0	0	0	0	0	0	0	0	0	0	0	0	1	0	0	0	4.49751	12.0094	36.9524	4		0	0	0	0	0	1
2	3	1	5	0	0	0	0	0	0	0	0	0	0	0	0	0	0	0	1	0	0	4.68182	13.1597	36.8673	4		0	0	0	0	0	1
3	3	1	5	0	0	0	0	0	0	0	0	0	0	0	0	0	0	0	0	1	0	2.60215	14.477	37.8796	4		0	0	0	0	0	1
4	2	1	5	0	0	0	0	0	0	0	0	0	0	0	0	0	0	2	0	0	0	4.28319	11.2303	37.4049	4		0	0	0	0	0	2
5	2	1	5	0	0	0	0	0	0	0	0	0	0	0	0	0	0	0	2	0	0	4.24101	11.6317	36.7663	4		0	0	0	0	0	2
6	2	1	5	0	0	0	0	0	0	0	0	0	0	0	0	0	0	0	0	2	0	3.65031	12.7265	35.3304	4		0	0	0	0	0	2
7	1	1	5	0	0	0	0	0	0	0	0	0	0	0	0	0	0	3	0	0	0	3.34977	13.5383	32.8358	4		0	0	0	0	0	3
8	1	1	5	0	0	0	0	0	0	0	0	0	0	0	0	0	0	0	3	0	0	4.40391	14.0454	34.2611	4		0	0	0	0	0	3
9	1	1	5	0	0	0	0	0	0	0	0	0	0	0	0	0	0	0	0	3	0	3.54978	13.0837	38.7023	4		0	0	0	0	0	3
10	0	1	5	0	0	0	0	0	0	0	0	0	0	0	0	0	0	4	0	0	0	4.16757	11.1983	33.0241	4		0	0	0	0	0	4
11	0	1	5	0	0	0	0	0	0	0	0	0	0	0	0	0	0	0	4	0	0	4.50554	12.7253	33.5787	4		0	0	0	0	0	4
12	0	1	5	0	0	0	0	0	0	0	0	0	0	0	0	0	0	0	0	4	0	3.14786	13.4469	37.1765	4		0	0	0	0	0	4
13	2	1	5	0	0	0	0	0	0	0	0	0	0	0	0	0	0	1	1	0	0	3.97087	11.7136	35.6405	4		0	0	0	0	0	2
14	2	1	5	0	0	0	0	0	0	0	0	0	0	0	0	0	0	1	0	1	0	2.92093	11.578	39.7856	4		0	0	0	0	0	2
15	2	1	5	0	0	0	0	0	0	0	0	0	0	0	0	0	0	0	1	1	0	3.49373	11.2249	38.3099	4		0	0	0	0	0	2
16	1	1	5	0	0	0	0	0	0	0	0	0	0	0	0	0	0	2	1	0	0	3.19573	13.8074	38.3014	4		0	0	0	0	0	3
17	1	1	5	0	0	0	0	0	0	0	0	0	0	0	0	0	0	2	0	1	0	3.43118	14.1812	34.2696	4		0	0	0	0	0	3
18	1	1	5	0	0	0	0	0	0	0	0	0	0	0	0	0	0	1	1	1	0	4.15492	12.2331	30.324	4		0	0	0	0	0	3
19	0	1	5	0	0	0	0	0	0	0	0	0	0	0	0	0	0	2	1	1	0	4.74882	13.5373	39.2366	4		0	0	0	0	0	4
20	0	1	5	0	0	0	0	0	0	0	0	0	0	0	0	0	0	2	0	2	0	3.43823	11.7653	38.7387	4		0	0	0	0	0	4
21	0	1	5	0	0	0	0	0	0	0	0	0	0	0	0	0	0	0	2	2	0	4.64687	12.4147	34.4329	4		0	0	0	0	0	4
22	5	2	8	0	0	0	0	0	0	0	0	0	0	0	0	0	0	1	0	0	0	4.29757	13.462	33.1014	4		0	0	0	0	0	1
23	4	2	8	0	0	0	0	0	0	0	0	0	0	0	0	0	0	2	0	0	0	4.93622	13.676	37.263	4		0	0	0	0	0	2
24	3	2	8	0	0	0	0	0	0	0	0	0	0	0	0	0	0	3	0	0	0	3.09028	12.6583	30.0776	4		0	0	0	0	0	3
25	4	2	8	0	0	0	0	0	0	0	0	0	0	0	0	0	0	2	0	0	0	2.7805	10.1351	31.9296	4		0	0	0	0	0	2
26	2	2	8	0	0	0	0	0	0	0	0	0	0	0	0	0	0	4	0	0	0	3.5625	12.1872	31.9516	4		0	0	0	0	0	4
27	0	2	8	0	0	0	0	0	0	0	0	0	0	0	0	0	0	6	0	0	0	3.79604	13.7353	37.0173	4		0	0	0	0	0	6
28	5	2	8	0	0	0	0	0	0	0	0	0	0	0	0	0	0	0	1	0	0	2.87756	13.1223	35.3455	4		0	0	0	0	0	1
29	4	2	8	0	0	0	0	0	0	0	0	0	0	0	0	0	0	0	2	0	0	3.88823	11.1534	36.167	4		0	0	0	0	0	2
30	3	2	8	0	0	0	0	0	0	0	0	0	0	0	0	0	0	0	3	0	0	4.07976	12.1422	36.4523	4		0	0	0	0	0	3
31	4	2	8	0	0	0	0	0	0	0	0	0	0	0	0	0	0	0	2	0	0	3.11198	14.5274	35.2911	4		0	0	0	0	0	2
32	2	2	8	0	0	0	0	0	0	0	0	0	0	0	0	0	0	0	4	0	0	3.88953	12.0592	36.9586	4		0	0	0	0	0	4
33	0	2	8	0	0	0	0	0	0	0	0	0	0	0	0	0	0	0	6	0	0	3.48533	10.9981	34.3799	4		0	0	0	0	0	6
34	5	2	8	0	0	0	0	0	0	0	0	0	0	0	0	0	0	0	0	1	0	4.4706	12.3484	36.7619	4		0	0	0	0	0	1
35	4	2	8	0	0	0	0	0	0	0	0	0	0	0	0	0	0	0	0	2	0	3.94337	10.8632	32.0325	4		0	0	0	0	0	2
36	3	2	8	0	0	0	0	0	0	0	0	0	0	0	0	0	0	0	0	3	0	3.65438	11.5836	34.6381	4		0	0	0	0	0	3
37	4	2	8	0	0	0	0	0	0	0	0	0	0	0	0	0	0	0	0	2	0	3.29333	14.2524	36.313	4		0	0	0	0	0	2
38	2	2	8	0	0	0	0	0	0	0	0	0	0	0	0	0	0	0	0	4	0	4.89193	13.0584	34.6521	4		0	0	0	0	0	4
39	0	2	8	0	0	0	0	0	0	0	0	0	0	0	0	0	0	0	0	6	0	3.64822	11.7872	30.8906	4		0	0	0	0	0	6
40	4	2	8	0	0	0	0	0	0	0	0	0	0	0	0	0	0	1	1	0	0	2.90805	10.5643	30.0655	4		0	0	0	0	0	2
41	4	2	8	0	0	0	0	0	0	0	0	0	0	0	0	0	0	1	0	1	0	2.86284	14.6265	37.3145	4		0	0	0	0	0	2
42	3	2	8	0	0	0	0	0	0	0	0	0	0	0	0	0	0	2	1	0	0	3.29196	13.2864	36.4431	4		0	0	0	0	0	3
43	3	2	8	0	0	0	0	0	0	0	0	0	0	0	0	0	0	2	0	1	0	2.91508	12.0843	31.9531	4		0	0	0	0	0	3
44	2	2	8	0	0	0	0	0	0	0	0	0	0	0	0	0	0	2	2	0	0	3.65072	13.8767	37.8517	4		0	0	0	0	0	4
45	2	2	8	0	0	0	0	0	0	0	0	0	0	0	0	0	0	2	0	2	0	3.86406	13.4797	38.0636	4		0	0	0	0	0	4
46	7	3	11	0	0	0	0	0	0	0	0	0	0	0	0	0	0	1	0	0	0	4.19172	11.3059	38.2404	4		0	0	0	0	0	1
47	6	3	11	0	0	0	0	0	0	0	0	0	0	0	0	0	0	2	0	0	0	4.38373	12.8403	38.3046	4		0	0	0	0	0	2
48	5	3	11	0	0	0	0	0	0	0	0	0	0	0	0	0	0	3	0	0	0	3.12023	11.8756	35.3191	4		0	0	0	0	0	3
49	5	3	11	0	0	0	0	0	0	0	0	0	0	0	0	0	0	3	0	0	0	3.50292	14.7381	39.6834	4		0	0	0	0	0	3
50	7	3	11	0	0	0	0	0	0	0	0	0	0	0	0	0	0	0	1	0	0	4.63812	13.4873	32.8723	4		0	0	0	0	0	1
51	6	3	11	0	0	0	0	0	0	0	0	0	0	0	0	0	0	0	2	0	0	3.67689	14.8977	32.6967	4		0	0	0	0	0	2
52	5	3	11	0	0	0	0	0	0	0	0	0	0	0	0	0	0	0	3	0	0	3.45623	13.8648	30.4072	4		0	0	0	0	0	3
53	5	3	11	0	0	0	0	0	0	0	0	0	0	0	0	0	0	0	3	0	0	3.67674	10.6153	34.6266	4		0	0	0	0	0	3
54	7	3	11	0	0	0	0	0	0	0	0	0	0	0	0	0	0	0	0	1	0	3.71268	13.8835	39.7031	4		0	0	0	0	0	1
55	6	3	11	0	0	0	0	0	0	0	0	0	0	0	0	0	0	0	0	2	0	3.56727	11.2475	32.0117	4		0	0	0	0	0	2
56	5	3	11	0	0	0	0	0	0	0	0	0	0	0	0	0	0	0	0	3	0	4.25635	12.1946	38.1529	4		0	0	0	0	0	3
57	5	3	11	0	0	0	0	0	0	0	0	0	0	0	0	0	0	0	0	3	0	3.95732	13.2657	32.0604	4		0	0	0	0	0	3
58	9	4	14	0	0	0	0	0	0	0	0	0	0	0	0	0	0	1	0	0	0	4.39108	13.4344	31.2114	4		0	0	0	0	0	1
59	7	4	14	0	0	0	0	0	0	0	0	0	0	0	0	0	0	3	0	0	0	3.53234	12.3754	32.7667	4		0	0	0	0	0	3
60	6	4	14	0	0	0	0	0	0	0	0	0	0	0	0	0	0	4	0	0	0	3.67029	12.3919	38.5829	4		0	0	0	0	0	4
61	5	4	14	0	0	0	0	0	0	0	0	0	0	0	0	0	0	5	0	0	0	3.05715	10.5765	34.8579	4		0	0	0	0	0	5
62	9	4	14	0	0	0	0	0	0	0	0	0	0	0	0	0	0	0	1	0	0	3.85294	12.835	33.9131	4		0	0	0	0	0	1
63	7	4	14	0	0	0	0	0	0	0	0	0	0	0	0	0	0	0	3	0	0	3.87831	10.4353	30.5748	4		0	0	0	0	0	3
64	6	4	14	0	0	0	0	0	0	0	0	0	0	0	0	0	0	0	4	0	0	4.0791	10.8121	31.2871	4		0	0	0	0	0	4
65	5	4	14	0	0	0	0	0	0	0	0	0	0	0	0	0	0	0	5	0	0	3.05368	12.0786	31.5896	4		0	0	0	0	0	5
66	9	4	14	0	0	0	0	0	0	0	0	0	0	0	0	0	0	0	0	1	0	4.32671	13.1965	34.3755	4		0	0	0	0	0	1
67	7	4	14	0	0	0	0	0	0	0	0	0	0	0	0	0	0	0	0	3	0	3.77158	11.3234	32.9386	4		0	0	0	0	0	3
68	6	4	14	0	0	0	0	0	0	0	0	0	0	0	0	0	0	0	0	4	0	3.6996	14.0067	32.4652	4		0	0	0	0	0	4
69	5	4	14	0	0	0	0	0	0	0	0	0	0	0	0	0	0	0	0	5	0	3.83026	12.784	39.6457	4		0	0	0	0	0	5
70	4	4	14	0	0	0	0	0	0	0	0	0	0	0	0	0	0	3	0	3	0	3.4788	13.8648	31.3627	4		0	0	0	0	0	6
71	9	4	14	0	0	0	0	0	0	0	0	0	0	0	0	0	0	1	0	0	0	4.17919	11.6262	36.8054	4		0	0	0	0	0	1
72	7	4	14	0	0	0	0	0	0	0	0	0	0	0	0	0	0	3	0	0	0	3.95888	12.5018	38.5011	4		0	0	0	0	0	3
73	1	4	14	0	0	0	0	0	0	0	0	0	0	0	0	0	0	9	0	0	0	3.71582	14.6219	35.5673	4		0	0	0	0	0	9
74	9	4	14	0	0	0	0	0	0	0	0	0	0	0	0	0	0	0	1	0	0	3.66714	12.8644	34.2077	4		0	0	0	0	0	1
75	7	4	14	0	0	0	0	0	0	0	0	0	0	0	0	0	0	0	3	0	0	4.40548	14.1722	32.2417	4		0	0	0	0	0	3
76	1	4	14	0	0	0	0	0	0	0	0	0	0	0	0	0	0	0	9	0	0	3.54168	13.2068	39.4797	4		0	0	0	0	0	9
77	9	4	14	0	0	0	0	0	0	0	0	0	0	0	0	0	0	0	0	1	0	4.73811	13.4687	30.8853	4		0	0	0	0	0	1
78	7	4	14	0	0	0	0	0	0	0	0	0	0	0	0	0	0	0	0	3	0	4.60537	11.9199	35.0241	4		0	0	0	0	0	3
79	1	4	14	0	0	0	0	0	0	0	0	0	0	0	0	0	0	0	0	9	0	3.37467	14.3714	34.4508	4		0	0	0	0	0	9
80	4	4	14	0	0	0	0	0	0	0	0	0	0	0	0	0	0	3	0	3	0	3.39712	11.2726	36.1815	4		0	0	0	0	0	6
81	5	3	9	0	0	0	0	0	0	0	0	0	0	0	0	0	0	1	0	0	0	3.98547	11.7871	33.0568	4		0	0	0	0	0	1
82	3	3	9	0	0	0	0	0	0	0	0	0	0	0	0	0	0	3	0	0	0	3.89548	13.2362	37.4537	4		0	0	0	0	0	3
83	5	3	9	0	0	0	0	0	0	0	0	0	0	0	0	0	0	1	0	0	0	3.44368	13.3854	38.9993	4		0	0	0	0	0	1
84	5	3	9	0	0	0	0	0	0	0	0	0	0	0	0	0	0	1	0	0	0	3.86323	13.4654	37.9626	4		0	0	0	0	0	1
85	4	3	9	0	0	0	0	0	0	0	0	0	0	0	0	0	0	2	0	0	0	4.35051	12.4372	37.1356	4		0	0	0	0	0	2
86	5	3	9	0	0	0	0	0	0	0	0	0	0	0	0	0	0	0	1	0	0	3.17839	10.978	34.0335	4		0	0	0	0	0	1
87	3	3	9	0	0	0	0	0	0	0	0	0	0	0	0	0	0	0	3	0	0	4.37806	13.019	37.003	4		0	0	0	0	0	3
88	5	3	9	0	0	0	0	0	0	0	0	0	0	0	0	0	0	0	1	0	0	3.17753	12.921	39.3595	4		0	0	0	0	0	1
89	5	3	9	0	0	0	0	0	0	0	0	0	0	0	0	0	0	0	1	0	0	3.90168	11.7415	36.5075	4		0	0	0	0	0	1
90	4	3	9	0	0	0	0	0	0	0	0	0	0	0	0	0	0	0	2	0	0	4.30691	12.7639	32.9072	4		0	0	0	0	0	2
91	5	3	9	0	0	0	0	0	0	0	0	0	0	0	0	0	0	0	0	1	0	3.92708	14.1721	33.0789	4		0	0	0	0	0	1
92	3	3	9	0	0	0	0	0	0	0	0	0	0	0	0	0	0	0	0	3	0	3.72185	12.728	37.7499	4		0	0	0	0	0	3
93	5	3	9	0	0	0	0	0	0	0	0	0	0	0	0	0	0	0	0	1	0	4.07349	13.0451	32.3337	4		0	0	0	0	0	1
94	5	3	9	0	0	0	0	0	0	0	0	0	0	0	0	0	0	0	0	1	0	4.51235	12.0834	39.352	4		0	0	0	0	0	1
95	4	3	9	0	0	0	0	0	0	0	0	0	0	0	0	0	0	0	0	2	0	3.20052	12.4961	36.2619	4		0	0	0	0	0	2
96	1	3	9	0	0	0	0	0	0	0	0	0	0	0	0	0	0	3	2	0	0	4.21944	12.5541	34.4033	4		0	0	0	0	0	5
97	1	3	9	0	0	0	0	0	0	0	0	0	0	0	0	0	0	0	3	2	0	3.19003	11.4743	35.7669	4		0	0	0	0	0	5
98	1	3	9	0	0	0	0	0	0	0	0	0	0	0	0	0	0	2	0	3	0	3.29927	12.448	39.9235	4		0	0	0	0	0	5
99	5	3	10	0	0	0	0	0	0	0	0	0	0	0	0	0	0	1	0	0	0	4.4615	12.4011	34.6564	4		0	0	0	0	0	1
100	4	3	10	0	0	0	0	0	0	0	0	0	0	0	0	0	0	2	0	0	0	4.69684	14.1328	31.6379	4		0	0	0	0	0	2
101	3	3	10	0	0	0	0	0	0	0	0	0	0	0	0	0	0	3	0	0	0	3.95729	12.3662	34.1471	4		0	0	0	0	0	3
102	5	3	10	0	0	0	0	0	0	0	0	0	0	0	0	0	0	0	1	0	0	3.45229	13.8412	38.0694	4		0	0	0	0	0	1
103	4	3	10	0	0	0	0	0	0	0	0	0	0	0	0	0	0	0	2	0	0	3.43347	11.6628	34.501	4		0	0	0	0	0	2
104	3	3	10	0	0	0	0	0	0	0	0	0	0	0	0	0	0	0	3	0	0	3.24864	10.8801	36.8792	4		0	0	0	0	0	3
105	5	3	10	0	0	0	0	0	0	0	0	0	0	0	0	0	0	0	0	1	0	3.855	11.9136	36.8094	4		0	0	0	0	0	1
106	4	3	10	0	0	0	0	0	0	0	0	0	0	0	0	0	0	0	0	2	0	3.87183	13.8978	34.8272	4		0	0	0	0	0	2
107	3	3	10	0	0	0	0	0	0	0	0	0	0	0	0	0	0	0	0	3	0	4.7049	11.0646	39.1517	4		0	0	0	0	0	3
108	2	3	10	0	0	0	0	0	0	0	0	0	0	0	0	0	0	3	0	1	0	3.71272	13.9167	34.8282	4		0	0	0	0	0	4
109	7	4	12	0	0	0	0	0	0	0	0	0	0	0	0	0	0	1	0	0	0	4.06082	11.8961	37.0774	4		0	0	0	0	0	1
110	6	4	12	0	0	0	0	0	0	0	0	0	0	0	0	0	0	2	0	0	0	3.65425	14.0404	35.1735	4		0	0	0	0	0	2
111	4	4	12	0	0	0	0	0	0	0	0	0	0	0	0	0	0	4	0	0	0	3.06257	13.0654	34.1105	4		0	0	0	0	0	4
112	7	4	12	0	0	0	0	0	0	0	0	0	0	0	0	0	0	0	1	0	0	4.72104	12.0002	33.6069	4		0	0	0	0	0	1
113	6	4	12	0	0	0	0	0	0	0	0	0	0	0	0	0	0	0	2	0	0	3.67944	12.4439	39.4578	4		0	0	0	0	0	2
114	4	4	12	0	0	0	0	0	0	0	0	0	0	0	0	0	0	0	4	0	0	3.63873	11.2732	33.8822	4		0	0	0	0	0	4
115	7	4	12	0	0	0	0	0	0	0	0	0	0	0	0	0	0	0	0	1	0	3.56732	13.2367	35.0599	4		0	0	0	0	0	1
116	6	4	12	0	0	0	0	0	0	0	0	0	0	0	0	0	0	0	0	2	0	3.70294	14.7443	30.119	4		0	0	0	0	0	2
117	4	4	12	0	0	0	0	0	0	0	0	0	0	0	0	0	0	0	0	4	0	3.25041	12.0716	31.1405	4		0	0	0	0	0	4
118	4	4	12	0	0	0	0	0	0	0	0	0	0	0	0	0	0	2	0	2	0	4.70263	11.5505	38.1066	4		0	0	0	0	0	4
119	4	4	12	0	0	0	0	0	0	0	0	0	0	0	0	0	0	2	0	2	0	4.42019	13.6256	36.6657	4		0	0	0	0	0	4
120	7	5	13	0	0	0	0	0	0	0	0	0	0	0	0	0	0	1	0	0	0	3.83821	11.5353	38.5202	4		0	0	0	0	0	1
121	7	5	13	0	0	0	0	0	0	0	0	0	0	0	0	0	0	1	0	0	0	3.03236	12.7992	39.0781	4		0	0	0	0	0	1
122	7	5	13	0	0	0	0	0	0	0	0	0	0	0	0	0	0	1	0	0	0	4.40348	13.2731	35.757	4		0	0	0	0	0	1
123	6	5	13	0	0	0	0	0	0	0	0	0	0	0	0	0	0	2	0	0	0	3.51925	12.8469	38.85	4		0	0	0	0	0	2
124	4	5	13	0	0	0	0	0	0	0	0	0	0	0	0	0	0	4	0	0	0	3.3193	13.8867	33.6808	4		0	0	0	0	0	4
125	7	5	13	0	0	0	0	0	0	0	0	0	0	0	0	0	0	0	1	0	0	2.84369	12.284	34.4649	4		0	0	0	0	0	1
126	7	5	13	0	0	0	0	0	0	0	0	0	0	0	0	0	0	0	1	0	0	3.52251	14.5726	36.7698	4		0	0	0	0	0	1
127	7	5	13	0	0	0	0	0	0	0	0	0	0	0	0	0	0	0	1	0	0	3.32271	13.3972	30.1129	4		0	0	0	0	0	1
128	6	5	13	0	0	0	0	0	0	0	0	0	0	0	0	0	0	0	2	0	0	3.3492	12.5349	34.6229	4		0	0	0	0	0	2
129	4	5	13	0	0	0	0	0	0	0	0	0	0	0	0	0	0	0	4	0	0	3.87637	10.8881	32.83	4		0	0	0	0	0	4
130	7	5	13	0	0	0	0	0	0	0	0	0	0	0	0	0	0	0	0	1	0	3.12718	14.0346	39.2883	4		0	0	0	0	0	1
131	7	5	13	0	0	0	0	0	0	0	0	0	0	0	0	0	0	0	0	1	0	3.51736	13.0628	37.4569	4		0	0	0	0	0	1
132	7	5	13	0	0	0	0	0	0	0	0	0	0	0	0	0	0	0	0	1	0	3.05435	11.6417	36.4237	4		0	0	0	0	0	1
133	6	5	13	0	0	0	0	0	0	0	0	0	0	0	0	0	0	0	0	2	0	3.4273	13.1469	35.1494	4		0	0	0	0	0	2
134	4	5	13	0	0	0	0	0	0	0	0	0	0	0	0	0	0	0	0	4	0	3.52681	10.474	38.4328	4		0	0	0	0	0	4
135	4	5	13	0	0	0	0	0	0	0	0	0	0	0	0	0	0	2	2	0	0	3.2086	11.1409	37.4681	4		0	0	0	0	0	4
136	5	5	13	0	0	0	0	0	0	0	0	0	0	0	0	0	0	2	0	1	0	4.66106	11.8983	37.7092	4		0	0	0	0	0	3
137	5	6	12	0	0	0	0	0	0	0	0	0	0	0	0	0	0	1	0	0	0	4.63459	13.3222	36.6579	4		0	0	0	0	0	1
138	4	6	12	0	0	0	0	0	0	0	0	0	0	0	0	0	0	2	0	0	0	3.43397	10.7415	34.8495	4		0	0	0	0	0	2
139	4	6	12	0	0	0	0	0	0	0	0	0	0	0	0	0	0	2	0	0	0	3.74064	11.8471	33.8334	4		0	0	0	0	0	2
140	4	6	12	0	0	0	0	0	0	0	0	0	0	0	0	0	0	2	0	0	0	3.64362	12.6869	38.7848	4		0	0	0	0	0	2
141	3	6	12	0	0	0	0	0	0	0	0	0	0	0	0	0	0	3	0	0	0	4.50197	12.0773	37.3543	4		0	0	0	0	0	3
142	3	6	12	0	0	0	0	0	0	0	0	0	0	0	0	0	0	3	0	0	0	4.49214	13.4607	31.989	4		0	0	0	0	0	3
143	3	6	12	0	0	0	0	0	0	0	0	0	0	0	0	0	0	3	0	0	0	3.77797	11.3753	39.0284	4		0	0	0	0	0	3
144	2	6	12	0	0	0	0	0	0	0	0	0	0	0	0	0	0	4	0	0	0	4.22981	11.1911	31.8301	4		0	0	0	0	0	4
145	2	6	12	0	0	0	0	0	0	0	0	0	0	0	0	0	0	4	0	0	0	3.81101	11.7487	30.3737	4		0	0	0	0	0	4
146	2	6	12	0	0	0	0	0	0	0	0	0	0	0	0	0	0	4	0	0	0	3.79176	12.565	33.2355	4		0	0	0	0	0	4
147	1	6	12	0	0	0	0	0	0	0	0	0	0	0	0	0	0	5	0	0	0	3.19355	13.0854	32.1399	4		0	0	0	0	0	5
148	0	6	12	0	0	0	0	0	0	0	0	0	0	0	0	0	0	6	0	0	0	3.25401	12.2842	37.9026	4		0	0	0	0	0	6
149	5	6	12	0	0	0	0	0	0	0	0	0	0	0	0	0	0	0	1	0	0	4.51154	10.6289	38.5599	4		0	0	0	0	0	1
150	4	6	12	0	0	0	0	0	0	0	0	0	0	0	0	0	0	0	2	0	0	2.66669	11.6634	34.7812	4		0	0	0	0	0	2
151	4	6	12	0	0	0	0	0	0	0	0	0	0	0	0	0	0	0	2	0	0	3.59739	12.2272	39.3008	4		0	0	0	0	0	2
152	4	6	12	0	0	0	0	0	0	0	0	0	0	0	0	0	0	0	2	0	0	4.35123	13.5212	32.7064	4		0	0	0	0	0	2
153	3	6	12	0	0	0	0	0	0	0	0	0	0	0	0	0	0	0	3	0	0	4.97415	13.5311	30.8182	4		0	0	0	0	0	3
154	3	6	12	0	0	0	0	0	0	0	0	0	0	0	0	0	0	0	3	0	0	4.08233	13.521	32.4885	4		0	0	0	0	0	3
155	3	6	12	0	0	0	0	0	0	0	0	0	0	0	0	0	0	0	3	0	0	4.10495	13.5591	39.3637	4		0	0	0	0	0	3
156	2	6	12	0	0	0	0	0	0	0	0	0	0	0	0	0	0	0	4	0	0	3.892	14.4889	32.331	4		0	0	0	0	0	4
157	2	6	12	0	0	0	0	0	0	0	0	0	0	0	0	0	0	0	4	0	0	3.41254	10.9212	31.5996	4		0	0	0	0	0	4
158	2	6	12	0	0	0	0	0	0	0	0	0	0	0	0	0	0	0	4	0	0	4.009	13.8232	32.8367	4		0	0	0	0	0	4
159	1	6	12	0	0	0	0	0	0	0	0	0	0	0	0	0	0	0	5	0	0	3.82831	14.3559	34.0327	4		0	0	0	0	0	5
160	0	6	12	0	0	0	0	0	0	0	0	0	0	0	0	0	0	0	6	0	0	3.00599	13.2238	30.3407	4		0	0	0	0	0	6
161	5	6	12	0	0	0	0	0	0	0	0	0	0	0	0	0	0	0	0	1	0	3.7588	10.5698	32.6151	4		0	0	0	0	0	1
162	4	6	12	0	0	0	0	0	0	0	0	0	0	0	0	0	0	0	0	2	0	4.88858	12.0359	33.7059	4		0	0	0	0	0	2
163	4	6	12	0	0	0	0	0	0	0	0	0	0	0	0	0	0	0	0	2	0	4.39766	11.8309	35.3244	4		0	0	0	0	0	2
164	4	6	12	0	0	0	0	0	0	0	0	0	0	0	0	0	0	0	0	2	0	4.21216	11.6611	34.6643	4		0	0	0	0	0	2
165	3	6	12	0	0	0	0	0	0	0	0	0	0	0	0	0	0	0	0	3	0	4.80931	13.0544	39.906	4		0	0	0	0	0	3
166	3	6	12	0	0	0	0	0	0	0	0	0	0	0	0	0	0	0	0	3	0	4.97085	12.2782	36.5369	4		0	0	0	0	0	3
167	3	6	12	0	0	0	0	0	0	0	0	0	0	0	0	0	0	0	0	3	0	3.21554	11.8956	39.5071	4		0	0	0	0	0	3
168	2	6	12	0	0	0	0	0	0	0	0	0	0	0	0	0	0	0	0	4	0	3.37899	13.2119	32.3453	4		0	0	0	0	0	4
169	2	6	12	0	0	0	0	0	0	0	0	0	0	0	0	0	0	0	0	4	0	3.60824	12.4782	38.3563	4		0	0	0	0	0	4
170	2	6	12	0	0	0	0	0	0	0	0	0	0	0	0	0	0	0	0	4	0	3.4248	11.9512	34.9993	4		0	0	0	0	0	4
171	1	6	12	0	0	0	0	0	0	0	0	0	0	0	0	0	0	0	0	5	0	2.75604	12.2187	30.3158	4		0	0	0	0	0	5
172	0	6	12	0	0	0	0	0	0	0	0	0	0	0	0	0	0	0	0	6	0	3.86614	11.5226	31.2536	4		0	0	0	0	0	6
173	3	6	12	0	0	0	0	0	0	0	0	0	0	0	0	0	0	1	1	1	0	3.05292	11.1294	32.395	4		0	0	0	0	0	3
174	2	6	12	0	0	0	0	0	0	0	0	0	0	0	0	0	0	2	0	2	0	3.85697	12.2812	39.762	4		0	0	0	0	0	4
175	2	6	12	0	0	0	0	0	0	0	0	0	0	0	0	0	0	2	0	2	0	4.51071	14.9492	36.7235	4		0	0	0	0	0	4
176	4	2	9	0	0	0	0	0	0	0	0	0	0	0	0	0	0	2	0	0	0	4.59235	13.778	35.4444	4		0	0	0	0	0	2
177	3	2	9	0	0	0	0	0	0	0	0	0	0	0	0	0	0	3	0	0	0	4.57538	13.3436	30.0186	4		0	0	0	0	0	3
178	1	2	9	0	0	0	0	0	0	0	0	0	0	0	0	0	0	5	0	0	0	3.70917	13.344	36.4294	4		0	0	0	0	0	5
179	4	2	9	0	0	0	0	0	0	0	0	0	0	0	0	0	0	0	2	0	0	3.03842	11.236	37.7109	4		0	0	0	0	0	2
180	3	2	9	0	0	0	0	0	0	0	0	0	0	0	0	0	0	0	3	0	0	3.34967	14.1176	33.9701	4		0	0	0	0	0	3
181	1	2	9	0	0	0	0	0	0	0	0	0	0	0	0	0	0	0	5	0	0	3.70812	11.1433	35.3195	4		0	0	0	0	0	5
182	4	2	9	0	0	0	0	0	0	0	0	0	0	0	0	0	0	0	0	2	0	3.54358	12.6696	31.6125	4		0	0	0	0	0	2
183	3	2	9	0	0	0	0	0	0	0	0	0	0	0	0	0	0	0	0	3	0	3.7369	13.574	32.0376	4		0	0	0	0	0	3
184	1	2	9	0	0	0	0	0	0	0	0	0	0	0	0	0	0	0	0	5	0	2.85109	13.6932	36.0278	4		0	0	0	0	0	5
185	3	4	9	0	0	0	0	0	0	0	0	0	0	0	0	0	0	1	0	0	0	3.14223	12.7717	33.4502	4		0	0	0	0	0	1
186	2	4	9	0	0	0	0	0	0	0	0	0	0	0	0	0	0	2	0	0	0	2.86302	10.9807	34.9832	4		0	0	0	0	0	2
187	2	4	9	0	0	0	0	0	0	0	0	0	0	0	0	0	0	2	0	0	0	3.49258	12.2873	39.5407	4		0	0	0	0	0	2
188	0	4	9	0	0	0	0	0	0	0	0	0	0	0	0	0	0	4	0	0	0	2.84152	10.3623	34.9668	4		0	0	0	0	0	4
189	3	4	9	0	0	0	0	0	0	0	0	0	0	0	0	0	0	0	1	0	0	3.47765	13.6074	37.9136	4		0	0	0	0	0	1
190	2	4	9	0	0	0	0	0	0	0	0	0	0	0	0	0	0	0	2	0	0	3.921	12.1957	30.0447	4		0	0	0	0	0	2
191	2	4	9	0	0	0	0	0	0	0	0	0	0	0	0	0	0	0	2	0	0	3.44568	12.5462	37.6893	4		0	0	0	0	0	2
192	0	4	9	0	0	0	0	0	0	0	0	0	0	0	0	0	0	0	4	0	0	4.37118	14.4023	33.5003	4		0	0	0	0	0	4
193	3	4	9	0	0	0	0	0	0	0	0	0	0	0	0	0	0	0	0	1	0	4.26867	13.2768	38.9468	4		0	0	0	0	0	1
194	2	4	9	0	0	0	0	0	0	0	0	0	0	0	0	0	0	0	0	2	0	3.3528	14.1009	38.0596	4		0	0	0	0	0	2
195	2	4	9	0	0	0	0	0	0	0	0	0	0	0	0	0	0	0	0	2	0	3.9694	12.2557	35.6643	4		0	0	0	0	0	2
196	0	4	9	0	0	0	0	0	0	0	0	0	0	0	0	0	0	0	0	4	0	3.93869	13.0393	38.1422	4		0	0	0	0	0	4
197	3	4	9	0	0	0	0	0	0	0	0	0	0	0	0	0	0	1	0	0	0	3.45035	12.5296	35.384	4		0	0	0	0	0	1
198	3	4	9	0	0	0	0	0	0	0	0	0	0	0	0	0	0	1	0	0	0	4.07169	12.7476	35.3968	4		0	0	0	0	0	1
199	3	4	9	0	0	0	0	0	0	0	0	0	0	0	0	0	0	0	1	0	0	3.21802	13.5981	33.445	4		0	0	0	0	0	1
200	3	4	9	0	0	0	0	0	0	0	0	0	0	0	0	0	0	0	1	0	0	3.19677	14.5521	39.1666	4		0	0	0	0	0	1
201	3	4	9	0	0	0	0	0	0	0	0	0	0	0	0	0	0	0	0	1	0	3.73629	13.7388	31.3803	4		0	0	0	0	0	1
202	3	4	9	0	0	0	0	0	0	0	0	0	0	0	0	0	0	0	0	1	0	3.9099	14.4154	33.5715	4		0	0	0	0	0	1
203	6	4	13	0	0	0	0	0	0	0	0	0	0	0	0	0	0	2	0	0	0	3.67863	12.9537	34.3546	4		0	0	0	0	0	2
204	6	4	13	0	0	0	0	0	0	0	0	0	0	0	0	0	0	2	0	0	0	3.50665	12.0809	39.9237	4		0	0	0	0	0	2
205	4	4	13	0	0	0	0	0	0	0	0	0	0	0	0	0	0	4	0	0	0	3.29863	13.358	32.6778	4		0	0	0	0	0	4
206	6	4	13	0	0	0	0	0	0	0	0	0	0	0	0	0	0	0	2	0	0	3.35357	12.5167	35.2431	4		0	0	0	0	0	2
207	6	4	13	0	0	0	0	0	0	0	0	0	0	0	0	0	0	0	2	0	0	3.46719	11.475	30.3105	4		0	0	0	0	0	2
208	4	4	13	0	0	0	0	0	0	0	0	0	0	0	0	0	0	0	4	0	0	3.27727	14.9079	32.6067	4		0	0	0	0	0	4
209	6	4	13	0	0	0	0	0	0	0	0	0	0	0	0	0	0	0	0	2	0	3.66846	14.3561	35.5936	4		0	0	0	0	0	2
210	6	4	13	0	0	0	0	0	0	0	0	0	0	0	0	0	0	0	0	2	0	3.63381	12.7091	30.7377	4		0	0	0	0	0	2
211	4	4	13	0	0	0	0	0	0	0	0	0	0	0	0	0	0	0	0	4	0	3.48872	14.1589	36.904	4		0	0	0	0	0	4
212	6	4	13	0	0	0	0	0	0	0	0	0	0	0	0	0	0	2	0	0	0	4.08065	14.5438	35.0831	4		0	0	0	0	0	2
213	6	4	13	0	0	0	0	0	0	0	0	0	0	0	0	0	0	0	2	0	0	4.73471	11.0272	38.957	4		0	0	0	0	0	2
214	6	4	13	0	0	0	0	0	0	0	0	0	0	0	0	0	0	0	0	2	0	4.1072	14.9148	35.1462	4		0	0	0	0	0	2
215	7	3	14	0	0	0	0	0	0	0	0	0	0	0	0	0	0	1	0	0	0	3.42609	13.1715	31.8713	4		0	0	0	0	0	1
216	6	3	14	0	0	0	0	0	0	0	0	0	0	0	0	0	0	2	0	0	0	4.26209	11.0629	33.439	4		0	0	0	0	0	2
217	7	3	14	0	0	0	0	0	0	0	0	0	0	0	0	0	0	0	1	0	0	3.62949	10.7457	34.0192	4		0	0	0	0	0	1
218	6	3	14	0	0	0	0	0	0	0	0	0	0	0	0	0	0	0	2	0	0	2.91354	11.1696	38.4752	4		0	0	0	0	0	2
219	7	3	14	0	0	0	0	0	0	0	0	0	0	0	0	0	0	0	0	1	0	4.91368	11.4741	33.2909	4		0	0	0	0	0	1
220	6	3	14	0	0	0	0	0	0	0	0	0	0	0	0	0	0	0	0	2	0	3.47893	14.4137	37.5292	4		0	0	0	0	0	2
221	6	3	14	0	0	0	0	0	0	0	0	0	0	0	0	0	0	2	0	0	0	3.58461	11.697	36.515	4		0	0	0	0	0	2
222	6	3	14	0	0	0	0	0	0	0	0	0	0	0	0	0	0	0	2	0	0	3.48191	11.998	30.3462	4		0	0	0	0	0	2
223	6	3	14	0	0	0	0	0	0	0	0	0	0	0	0	0	0	0	0	2	0	3.40822	14.4611	31.0664	4		0	0	0	0	0	2
224	6	4	14	0	0	0	0	0	0	0	0	0	0	0	0	0	0	2	0	0	0	4.2108	12.2306	38.6522	4		0	0	0	0	0	2
225	6	4	14	0	0	0	0	0	0	0	0	0	0	0	0	0	0	2	0	0	0	4.18235	12.7535	33.5063	4		0	0	0	0	0	2
226	4	4	14	0	0	0	0	0	0	0	0	0	0	0	0	0	0	4	0	0	0	2.895	14.4826	33.5267	4		0	0	0	0	0	4
227	4	4	14	0	0	0	0	0	0	0	0	0	0	0	0	0	0	4	0	0	0	4.1437	10.9187	33.7137	4		0	0	0	0	0	4
228	6	4	14	0	0	0	0	0	0	0	0	0	0	0	0	0	0	0	2	0	0	3.29229	11.0997	37.8683	4		0	0	0	0	0	2
229	6	4	14	0	0	0	0	0	0	0	0	0	0	0	0	0	0	0	2	0	0	4.5446	10.7986	31.9417	4		0	0	0	0	0	2
230	4	4	14	0	0	0	0	0	0	0	0	0	0	0	0	0	0	0	4	0	0	3.94941	12.9002	37.1925	4		0	0	0	0	0	4
231	4	4	14	0	0	0	0	0	0	0	0	0	0	0	0	0	0	0	4	0	0	4.02481	12.8184	36.7007	4		0	0	0	0	0	4
232	6	4	14	0	0	0	0	0	0	0	0	0	0	0	0	0	0	0	0	2	0	4.00326	11.8998	33.7897	4		0	0	0	0	0	2
233	6	4	14	0	0	0	0	0	0	0	0	0	0	0	0	0	0	0	0	2	0	4.2338	12.6401	33.215	4		0	0	0	0	0	2
234	4	4	14	0	0	0	0	0	0	0	0	0	0	0	0	0	0	0	0	4	0	4.34534	13.0479	34.7974	4		0	0	0	0	0	4
235	4	4	14	0	0	0	0	0	0	0	0	0	0	0	0	0	0	0	0	4	0	3.79348	14.5848	33.2106	4		0	0	0	0	0	4
236	6	4	14	0	0	0	0	0	0	0	0	0	0	0	0	0	0	2	0	0	0	4.19485	14.877	37.0753	4		0	0	0	0	0	2
237	6	4	14	0	0	0	0	0	0	0	0	0	0	0	0	0	0	2	0	0	0	3.8761	10.2778	39.7579	4		0	0	0	0	0	2
238	6	3	14	0	0	0	0	0	0	0	0	0	0	0	0	0	0	1	0	0	0	4.50816	10.4803	36.6957	4		0	0	0	0	0	1
239	5	3	14	0	0	0	0	0	0	0	0	0	0	0	0	0	0	2	0	0	0	3.02429	13.6229	38.9979	4		0	0	0	0	0	2
240	6	3	14	0	0	0	0	0	0	0	0	0	0	0	0	0	0	0	1	0	0	3.54254	13.4146	35.7832	4		0	0	0	0	0	1
241	5	3	14	0	0	0	0	0	0	0	0	0	0	0	0	0	0	0	2	0	0	2.79056	13.9156	31.4422	4		0	0	0	0	0	2
242	6	3	14	0	0	0	0	0	0	0	0	0	0	0	0	0	0	0	0	1	0	4.37837	12.0234	31.5573	4		0	0	0	0	0	1
243	5	3	14	0	0	0	0	0	0	0	0	0	0	0	0	0	0	0	0	2	0	2.68517	14.7831	32.903	4		0	0	0	0	0	2
244	11	6	22	0	0	0	0	0	0	0	0	0	0	0	0	0	0	3	0	0	0	3.61709	14.14	38.9376	4		0	0	0	0	0	3
245	5	6	22	0	0	0	0	0	0	0	0	0	0	0	0	0	0	9	0	0	0	3.19365	13.7037	33.8966	4		0	0	0	0	0	9
246	11	6	22	0	0	0	0	0	0	0	0	0	0	0	0	0	0	0	3	0	0	3.97794	12.0995	37.0591	4		0	0	0	0	0	3
247	5	6	22	0	0	0	0	0	0	0	0	0	0	0	0	0	0	0	9	0	0	3.66116	12.2317	34.7841	4		0	0	0	0	0	9
248	11	6	22	0	0	0	0	0	0	0	0	0	0	0	0	0	0	0	0	3	0	4.6984	14.0453	34.8685	4		0	0	0	0	0	3
249	5	6	22	0	0	0	0	0	0	0	0	0	0	0	0	0	0	0	0	9	0	3.3172	11.6581	35.2312	4		0	0	0	0	0	9
250	6	12	24	0	0	0	0	0	0	0	0	0	0	0	0	0	0	4	0	0	0	3.35471	12.9436	39.6247	4		0	0	0	0	0	4
251	4	12	24	0	0	0	0	0	0	0	0	0	0	0	0	0	0	6	0	0	0	4.56532	11.9412	38.0497	4		0	0	0	0	0	6
252	6	12	24	0	0	0	0	0	0	0	0	0	0	0	0	0	0	0	4	0	0	4.07566	13.0112	37.1025	4		0	0	0	0	0	4
253	4	12	24	0	0	0	0	0	0	0	0	0	0	0	0	0	0	0	6	0	0	4.25343	14.5461	34.5186	4		0	0	0	0	0	6
254	6	12	24	0	0	0	0	0	0	0	0	0	0	0	0	0	0	0	0	4	0	3.18252	11.5709	35.4464	4		0	0	0	0	0	4
255	4	12	24	0	0	0	0	0	0	0	0	0	0	0	0	0	0	0	0	6	0	3.37687	12.2434	33.4588	4		0	0	0	0	0	6
256	5	3	10	0	0	0	0	0	0	0	0	0	0	0	0	1	0	1	0	0	0	3.78933	10.6654	37.1976	4		0	0	0	0	1	1
257	4	3	10	0	0	0	0	0	0	0	0	0	0	0	0	1	0	2	0	0	0	3.66294	12.2589	36.9472	4		0	0	0	0	1	2
258	3	3	10	0	0	0	0	0	0	0	0	0	0	0	0	1	0	3	0	0	0	4.38525	12.9009	39.1976	4		0	0	0	0	1	3
259	3	4	9	0	0	0	0	0	0	0	0	0	0	0	0	1	0	1	0	0	0	4.13553	11.8247	32.3595	4		0	0	0	0	1	1
260	3	4	9	0	0	0	0	0	0	0	0	0	0	0	0	1	0	1	0	0	0	3.33779	11.7473	38.0997	4		0	0	0	0	1	1
261	3	4	9	0	0	0	0	0	0	0	0	0	0	0	0	1	0	0	1	0	0	4.28522	13.6692	34.2001	4		0	0	0	0	1	1
262	3	4	9	0	0	0	0	0	0	0	0	0	0	0	0	1	0	0	1	0	0	4.16556	13.2929	35.5571	4		0	0	0	0	1	1
263	3	4	9	0	0	0	0	0	0	0	0	0	0	0	0	1	0	0	0	1	0	3.80558	12.0836	36.5961	4		0	0	0	0	1	1
264	3	4	9	0	0	0	0	0	0	0	0	0	0	0	0	1	0	0	0	1	0	3.87011	14.0895	36.4183	4		0	0	0	0	1	1
265	3	4	9	0	0	0	0	0	0	0	0	0	0	0	0	0	1	1	0	0	0	3.38851	11.6678	33.907	4		0	0	0	0	1	1
266	3	4	9	0	0	0	0	0	0	0	0	0	0	0	0	0	1	1	0	0	0	3.80861	14.2045	36.7161	4		0	0	0	0	1	1
267	3	4	9	0	0	0	0	0	0	0	0	0	0	0	0	0	1	0	1	0	0	4.41746	13.3372	37.7629	4		0	0	0	0	1	1
268	3	4	9	0	0	0	0	0	0	0	0	0	0	0	0	0	1	0	1	0	0	4.07678	11.3972	37.6479	4		0	0	0	0	1	1
269	3	4	9	0	0	0	0	0	0	0	0	0	0	0	0	0	1	0	0	1	0	4.00725	14.4236	36.7318	4		0	0	0	0	1	1
270	3	4	9	0	0	0	0	0	0	0	0	0	0	0	0	0	1	0	0	1	0	4.76933	12.6805	38.6171	4		0	0	0	0	1	1
271	6	4	13	0	0	0	0	0	0	0	0	0	0	0	0	1	0	2	0	0	0	3.57049	11.1523	30.5292	4		0	0	0	0	1	2
272	6	4	13	0	0	0	0	0	0	0	0	0	0	0	0	1	0	0	2	0	0	3.86426	14.6669	37.1697	4		0	0	0	0	1	2
273	6	4	13	0	0	0	0	0	0	0	0	0	0	0	0	1	0	0	0	2	0	4.99505	13.3369	32.7426	4		0	0	0	0	1	2
274	6	4	13	0	0	0	0	0	0	0	0	0	0	0	0	0	1	2	0	0	0	3.47858	14.9831	32.5776	4		0	0	0	0	1	2
275	6	4	13	0	0	0	0	0	0	0	0	0	0	0	0	0	1	0	2	0	0	4.09724	12.4027	34.723	4		0	0	0	0	1	2
276	6	4	13	0	0	0	0	0	0	0	0	0	0	0	0	0	1	0	0	2	0	4.48314	12.8312	37.9056	4		0	0	0	0	1	2
277	6	3	14	0	0	0	0	0	0	0	0	0	0	0	0	1	0	2	0	0	0	3.16212	14.3915	31.5714	4		0	0	0	0	1	2
278	6	3	14	0	0	0	0	0	0	0	0	0	0	0	0	1	0	0	2	0	0	3.67934	11.7196	33.4388	4		0	0	0	0	1	2
279	6	3	14	0	0	0	0	0	0	0	0	0	0	0	0	1	0	0	0	2	0	3.73809	12.1311	30.9627	4		0	0	0	0	1	2
280	6	3	14	0	0	0	0	0	0	0	0	0	0	0	0	0	1	2	0	0	0	3.44545	10.7464	39.7351	4		0	0	0	0	1	2
281	6	3	14	0	0	0	0	0	0	0	0	0	0	0	0	0	1	0	2	0	0	4.30094	11.004	30.3739	4		0	0	0	0	1	2
282	6	3	14	0	0	0	0	0	0	0	0	0	0	0	0	0	1	0	0	2	0	3.14303	11.2099	36.1457	4		0	0	0	0	1	2
283	6	4	14	0	0	0	0	0	0	0	0	0	0	0	0	1	0	2	0	0	0	4.09005	13.4179	38.6529	4		0	0	0	0	1	2
284	6	4	14	0	0	0	0	0	0	0	0	0	0	0	0	0	1	2	0	0	0	3.39424	13.9258	35.9056	4		0	0	0	0	1	2
285	6	4	14	0	0	0	0	0	0	0	0	0	0	0	0	2	0	2	0	0	0	4.65452	13.7654	31.309	4		0	0	0	0	2	2
286	6	4	14	0	0	0	0	0	0	0	0	0	0	0	0	1	1	2	0	0	0	4.40965	12.1619	30.552	4		0	0	0	0	2	2
287	6	4	14	0	0	0	0	0	0	0	0	0	0	0	0	0	2	2	0	0	0	3.36526	10.5036	36.5494	4		0	0	0	0	2	2
288	6	3	14	0	0	0	0	0	0	0	0	0	0	0	0	1	0	1	0	0	0	3.10763	13.2844	37.2712	4		0	0	0	0	1	1
289	6	3	14	0	0	0	0	0	0	0	0	0	0	0	0	1	0	0	1	0	0	4.24774	13.8116	31.7836	4		0	0	0	0	1	1
290	6	3	14	0	0	0	0	0	0	0	0	0	0	0	0	1	0	0	0	1	0	3.26674	10.8636	30.7791	4		0	0	0	0	1	1
291	6	3	14	0	0	0	0	0	0	0	0	0	0	0	0	0	1	1	0	0	0	4.44961	11.4288	32.9953	4		0	0	0	0	1	1
292	6	3	14	0	0	0	0	0	0	0	0	0	0	0	0	0	1	0	1	0	0	4.12422	12.292	36.6512	4		0	0	0	0	1	1
293	6	3	14	0	0	0	0	0	0	0	0	0	0	0	0	0	1	0	0	1	0	4.87058	13.8604	31.2993	4		0	0	0	0	1	1
294	11	6	22	0	0	0	0	0	0	0	0	0	0	0	0	2	0	3	0	0	0	4.58277	13.4422	34.39	4		0	0	0	0	2	3
295	11	6	22	0	0	0	0	0	0	0	0	0	0	0	0	2	0	0	3	0	0	3.48606	14.3354	36.5806	4		0	0	0	0	2	3
296	11	6	22	0	0	0	0	0	0	0	0	0	0	0	0	2	0	0	0	3	0	4.32998	14.0307	32.7196	4		0	0	0	0	2	3
297	11	6	22	0	0	0	0	0	0	0	0	0	0	0	0	1	1	3	0	0	0	3.14734	14.2127	34.7748	4		0	0	0	0	2	3
298	11	6	22	0	0	0	0	0	0	0	0	0	0	0	0	1	1	0	3	0	0	4.29188	13.6223	35.6137	4		0	0	0	0	2	3
299	11	6	22	0	0	0	0	0	0	0	0	0	0	0	0	1	1	0	0	3	0	4.86798	12.126	37.1351	4		0	0	0	0	2	3
300	11	6	22	0	0	0	0	0	0	0	0	0	0	0	0	0	2	3	0	0	0	3.69414	11.7369	33.2118	4		0	0	0	0	2	3
301	11	6	22	0	0	0	0	0	0	0	0	0	0	0	0	0	2	0	3	0	0	3.40002	13.6679	34.6499	4		0	0	0	0	2	3
302	11	6	22	0	0	0	0	0	0	0	0	0	0	0	0	0	2	0	0	3	0	3.31388	13.4754	33.7143	4		0	0	0	0	2	3
303	6	12	24	0	0	0	0	0	0	0	0	0	0	0	0	2	0	4	0	0	0	3.61809	12.4228	35.9018	4		0	0	0	0	2	4
304	6	12	24	0	0	0	0	0	0	0	0	0	0	0	0	2	0	0	4	0	0	4.12518	12.0821	31.3529	4		0	0	0	0	2	4
305	6	12	24	0	0	0	0	0	0	0	0	0	0	0	0	2	0	0	0	4	0	3.15748	12.1453	31.9115	4		0	0	0	0	2	4
306	6	12	24	0	0	0	0	0	0	0	0	0	0	0	0	1	1	4	0	0	0	3.71472	13.9909	34.6464	4		0	0	0	0	2	4
307	6	12	24	0	0	0	0	0	0	0	0	0	0	0	0	1	1	0	4	0	0	3.7761	14.608	38.0594	4		0	0	0	0	2	4
308	6	12	24	0	0	0	0	0	0	0	0	0	0	0	0	1	1	0	0	4	0	3.6527	12.6841	36.7138	4		0	0	0	0	2	4
309	6	12	24	0	0	0	0	0	0	0	0	0	0	0	0	0	2	4	0	0	0	3.81377	13.5337	32.3736	4		0	0	0	0	2	4
310	6	12	24	0	0	0	0	0	0	0	0	0	0	0	0	0	2	0	4	0	0	2.94095	14.9087	31.902	4		0	0	0	0	2	4
311	6	12	24	0	0	0	0	0	0	0	0	0	0	0	0	0	2	0	0	4	0	4.68036	13.6852	33.0242	4		0	0	0	0	2	4
312	0	1	4	0	0	0	0	0	0	0	0	0	0	0	0	1	0	2	0	0	0	4.27231	14.3827	34.9612	4		0	0	0	0	1	2
313	0	1	4	0	0	0	0	0	0	0	0	0	0	0	0	1	0	1	1	0	0	2.9248	13.5204	33.4473	4		0	0	0	0	1	2
314	0	1	4	0	0	0	0	0	0	0	0	0	0	0	0	1	0	1	0	1	0	4.26908	13.2291	33.6586	4		0	0	0	0	1	2
315	0	1	4	0	0	0	0	0	0	0	0	0	0	0	0	1	0	0	2	0	0	4.09457	11.592	35.8304	4		0	0	0	0	1	2
316	0	1	4	0	0	0	0	0	0	0	0	0	0	0	0	1	0	0	1	1	0	4.19	13.2451	39.0319	4		0	0	0	0	1	2
317	0	1	4	0	0	0	0	0	0	0	0	0	0	0	0	1	0	0	0	2	0	3.12271	13.2044	34.5093	4		0	0	0	0	1	2
318	0	1	4	0	0	0	0	0	0	0	0	0	0	0	0	0	1	2	0	0	0	3.64133	11.3556	34.6788	4		0	0	0	0	1	2
319	0	1	4	0	0	0	0	0	0	0	0	0	0	0	0	0	1	1	1	0	0	4.16756	12.4006	37.6811	4		0	0	0	0	1	2
320	0	1	4	0	0	0	0	0	0	0	0	0	0	0	0	0	1	1	0	1	0	3.70171	14.85	36.7679	4		0	0	0	0	1	2
321	0	1	4	0	0	0	0	0	0	0	0	0	0	0	0	0	1	0	2	0	0	3.86372	13.3652	30.2286	4		0	0	0	0	1	2
322	0	1	4	0	0	0	0	0	0	0	0	0	0	0	0	0	1	0	1	1	0	4.40227	14.9263	32.436	4		0	0	0	0	1	2
323	0	1	4	0	0	0	0	0	0	0	0	0	0	0	0	0	1	0	0	2	0	3.782	14.0805	34.3119	4		0	0	0	0	1	2
324	6	2	9	0	0	0	0	0	0	0	0	0	0	0	0	1	0	0	0	0	0	3.702	13.0111	30.0756	4		0	0	0	0	1	0
325	6	2	9	0	0	0	0	0	0	0	0	0	0	0	0	0	1	0	0	0	0	2.97351	14.2328	36.0205	4		0	0	0	0	1	0
326	10	12	24	0	0	0	0	0	0	0	0	0	0	0	0	2	0	0	0	0	0	4.26883	13.3742	37.1293	4		0	0	0	0	2	0
327	10	12	24	0	0	0	0	0	0	0	0	0	0	0	0	1	1	0	0	0	0	3.40737	13.6926	30.315	4		0	0	0	0	2	0
328	10	12	24	0	0	0	0	0	0	0	0	0	0	0	0	0	2	0	0	0	0	3.99064	13.5547	33.7149	4		0	0	0	0	2	0
329	3	2	7	0	0	0	0	0	0	0	0	0	0	0	0	1	0	0	0	0	0	3.48751	12.4634	36.83	4		0	0	0	0	1	0
330	3	2	7	0	0	0	0	0	0	0	0	0	0	0	0	0	1	0	0	0	0	4.30819	13.7918	32.7804	4		0	0	0	0	1	0
331	7	4	13	0	0	0	0	0	0	0	0	0	0	0	0	1	0	0	0	0	0	3.0684	11.5716	32.3418	4		0	0	0	0	1	0
332	7	4	13	0	0	0	0	0	0	0	0	0	0	0	0	0	1	0	0	0	0	4.04054	11.4792	36.0193	4		0	0	0	0	1	0
333	5	4	11	0	0	0	0	0	0	0	0	0	0	0	0	1	0	0	0	0	0	4.55548	12.5289	34.1498	4		0	0	0	0	1	0
334	5	4	11	0	0	0	0	0	0	0	0	0	0	0	0	0	1	0	0	0	0	4.12083	12.7127	31.0238	4		0	0	0	0	1	0
335	5	5	12	0	0	0	0	0	0	0	0	0	0	0	0	1	0	0	0	0	0	4.00657	13.4421	36.2004	4		0	0	0	0	1	0
336	5	5	12	0	0	0	0	0	0	0	0	0	0	0	0	0	1	0	0	0	0	3.25399	12.1304	38.1855	4		0	0	0	0	1	0
337	5	7	14	0	0	0	0	0	0	0	0	0	0	0	0	1	0	0	0	0	0	3.43922	11.337	38.1855	4		0	0	0	0	1	0
338	5	7	14	0	0	0	0	0	0	0	0	0	0	0	0	0	1	0	0	0	0	4.25497	11.0748	36.0067	4		0	0	0	0	1	0
339	0	1	3	0	0	0	0	0	0	0	0	0	0	0	0	2	0	0	0	0	0	3.15702	12.562	39.6475	4		0	0	0	0	2	0
340	0	1	3	0	0	0	0	0	0	0	0	0	0	0	0	1	1	0	0	0	0	3.99526	11.7033	33.7824	4		0	0	0	0	2	0
341	0	1	3	0	0	0	0	0	0	0	0	0	0	0	0	0	2	0	0	0	0	4.16616	13.9218	39.4073	4		0	0	0	0	2	0
342	8	7	16	0	0	0	0	0	0	0	0	0	0	0	0	1	0	0	0	0	0	4.25052	11.5641	32.8505	4		0	0	0	0	1	0
343	8	7	16	0	0	0	0	0	0	0	0	0	0	0	0	0	1	0	0	0	0	3.44489	10.4169	33.5141	4		0	0	0	0	1	0
344	10	8	19	0	0	0	0	0	0	0	0	0	0	0	0	1	0	0	0	0	0	3.74941	12.3719	31.6936	4		0	0	0	0	1	0
345	10	8	19	0	0	0	0	0	0	0	0	0	0	0	0	0	1	0	0	0	0	3.92305	11.736	33.2389	4		0	0	0	0	1	0
346	10	9	20	0	0	0	0	0	0	0	0	0	0	0	0	1	0	0	0	0	0	3.84579	13.1261	31.9463	4		0	0	0	0	1	0
347	10	9	20	0	0	0	0	0	0	0	0	0	0	0	0	0	1	0	0	0	0	3.23073	12.2426	32.314	4		0	0	0	0	1	0
348	9	8	19	0	0	0	0	0	0	0	0	0	0	0	0	1	0	0	0	0	0	4.33045	13.5349	31.6369	4		0	0	0	0	1	0
349	9	8	19	0	0	0	0	0	0	0	0	0	0	0	0	0	1	0	0	0	0	4.44591	11.3483	38.1313	4		0	0	0	0	1	0
350	7	8	17	0	0	0	0	0	0	0	0	0	0	0	0	1	0	0	0	0	0	3.24491	11.3971	39.3853	4		0	0	0	0	1	0
351	7	8	17	0	0	0	0	0	0	0	0	0	0	0	0	0	1	0	0	0	0	3.32337	13.9842	36.0101	4		0	0	0	0	1	0
352	8	9	18	0	0	0	0	0	0	0	0	0	0	0	0	1	0	0	0	0	0	2.77362	13.7729	31.1473	4		0	0	0	0	1	0
353	8	9	18	0	0	0	0	0	0	0	0	0	0	0	0	0	1	0	0	0	0	4.02914	13.5751	32.2924	4		0	0	0	0	1	0
354	12	13	26	0	0	0	0	0	0	0	0	0	0	0	0	1	0	0	0	0	0	4.24068	14.6305	39.148	4		0	0	0	0	1	0
355	12	13	26	0	0	0	0	0	0	0	0	0	0	0	0	0	1	0	0	0	0	3.65403	11.4208	38.7353	4		0	0	0	0	1	0
356	2	1	5	0	0	0	0	0	0	0	0	0	0	0	0	1	0	0	0	0	0	2.91873	12.4886	39.2432	4		0	0	0	0	1	0
357	2	1	5	0	0	0	0	0	0	0	0	0	0	0	0	0	1	0	0	0	0	3.32433	13.5276	38.5985	4		0	0	0	0	1	0
358	3	1	6	0	0	0	0	0	0	0	0	0	0	0	0	1	0	0	0	0	0	3.50097	13.0859	38.1864	4		0	0	0	0	1	0
359	3	1	6	0	0	0	0	0	0	0	0	0	0	0	0	0	1	0	0	0	0	4.71232	10.8073	32.672	4		0	0	0	0	1	0
360	2	1	5	0	0	0	0	0	0	0	0	0	0	0	0	1	0	0	0	0	0	3.95359	11.2174	35.9388	4		0	0	0	0	1	0
361	2	1	5	0	0	0	0	0	0	0	0	0	0	0	0	0	1	0	0	0	0	3.52855	13.2963	37.0546	4		0	0	0	0	1	0
362	2	1	5	0	0	0	0	0	0	0	0	0	0	0	0	2	0	0	0	0	0	3.24672	12.4924	32.7781	4		0	0	0	0	2	0
363	2	1	5	0	0	0	0	0	0	0	0	0	0	0	0	1	1	0	0	0	0	4.48625	12.8114	36.2999	4		0	0	0	0	2	0
364	2	1	5	0	0	0	0	0	0	0	0	0	0	0	0	1	1	0	0	0	0	3.23313	13.9691	30.8231	4		0	0	0	0	2	0
365	2	1	5	0	0	0	0	0	0	0	0	0	0	0	0	0	2	0	0	0	0	3.38666	12.0601	33.9903	4		0	0	0	0	2	0
366	4	2	8	0	0	0	0	0	0	0	0	0	0	0	0	1	0	0	0	0	0	3.49586	10.9628	35.9864	4		0	0	0	0	1	0
367	4	2	8	0	0	0	0	0	0	0	0	0	0	0	0	0	1	0	0	0	0	4.86304	11.3043	38.1545	4		0	0	0	0	1	0
368	5	2	9	0	0	0	0	0	0	0	0	0	0	0	0	1	0	0	0	0	0	3.66502	13.0531	32.5342	4		0	0	0	0	1	0
369	5	2	9	0	0	0	0	0	0	0	0	0	0	0	0	0	1	0	0	0	0	3.28345	13.0876	33.8343	4		0	0	0	0	1	0
370	7	3	12	0	0	0	0	0	0	0	0	0	0	0	0	1	0	0	0	0	0	3.03203	13.2657	37.5717	4		0	0	0	0	1	0
371	7	3	12	0	0	0	0	0	0	0	0	0	0	0	0	0	1	0	0	0	0	3.52669	12.8926	36.615	4		0	0	0	0	1	0
372	4	2	8	0	0	0	0	0	0	0	0	0	0	0	0	1	0	0	0	0	0	3.64632	14.3668	33.5842	4		0	0	0	0	1	0
373	4	2	8	0	0	0	0	0	0	0	0	0	0	0	0	0	1	0	0	0	0	4.5345	10.4435	31.8067	4		0	0	0	0	1	0
374	4	2	8	0	0	0	0	0	0	0	0	0	0	0	0	2	0	0	0	0	0	3.29499	12.7092	35.7775	4		0	0	0	0	2	0
375	4	2	8	0	0	0	0	0	0	0	0	0	0	0	0	1	1	0	0	0	0	3.33789	13.6319	37.6788	4		0	0	0	0	2	0
376	4	2	8	0	0	0	0	0	0	0	0	0	0	0	0	1	1	0	0	0	0	3.69039	14.1205	31.8845	4		0	0	0	0	2	0
377	4	2	8	0	0	0	0	0	0	0	0	0	0	0	0	0	2	0	0	0	0	2.81736	12.5919	33.8565	4		0	0	0	0	2	0
378	6	3	11	0	0	0	0	0	0	0	0	0	0	0	0	1	0	0	0	0	0	4.65993	14.829	36.6458	4		0	0	0	0	1	0
379	6	3	11	0	0	0	0	0	0	0	0	0	0	0	0	0	1	0	0	0	0	4.46157	10.7012	33.7188	4		0	0	0	0	1	0
380	7	3	12	0	0	0	0	0	0	0	0	0	0	0	0	1	0	0	0	0	0	3.72409	12.0793	35.004	4		0	0	0	0	1	0
381	7	3	12	0	0	0	0	0	0	0	0	0	0	0	0	0	1	0	0	0	0	4.52252	11.829	38.6946	4		0	0	0	0	1	0
382	9	4	15	0	0	0	0	0	0	0	0	0	0	0	0	1	0	0	0	0	0	3.4997	12.5358	35.0077	4		0	0	0	0	1	0
383	9	4	15	0	0	0	0	0	0	0	0	0	0	0	0	0	1	0	0	0	0	3.99421	10.9424	36.1735	4		0	0	0	0	1	0
384	6	3	11	0	0	0	0	0	0	0	0	0	0	0	0	1	0	0	0	0	0	4.19318	10.7923	39.6206	4		0	0	0	0	1	0
385	6	3	11	0	0	0	0	0	0	0	0	0	0	0	0	0	1	0	0	0	0	3.90441	13.0377	35.665	4		0	0	0	0	1	0
386	6	3	11	0	0	0	0	0	0	0	0	0	0	0	0	2	0	0	0	0	0	3.48898	11.9754	33.8942	4		0	0	0	0	2	0
387	6	3	11	0	0	0	0	0	0	0	0	0	0	0	0	1	1	0	0	0	0	3.76957	12.5006	36.0969	4		0	0	0	0	2	0
388	6	3	11	0	0	0	0	0	0	0	0	0	0	0	0	1	1	0	0	0	0	3.81833	11.7906	33.4425	4		0	0	0	0	2	0
389	6	3	11	0	0	0	0	0	0	0	0	0	0	0	0	0	2	0	0	0	0	4.28222	11.6202	35.3883	4		0	0	0	0	2	0
390	10	5	17	0	0	0	0	0	0	0	0	0	0	0	0	2	0	0	0	0	0	3.38381	11.642	33.4827	4		0	0	0	0	2	0
391	10	5	17	0	0	0	0	0	0	0	0	0	0	0	0	1	1	0	0	0	0	4.06344	12.7518	38.9897	4		0	0	0	0	2	0
392	8	5	15	0	0	0	0	0	0	0	0	0	0	0	0	2	0	0	0	0	0	3.45585	11.3497	38.4073	4		0	0	0	0	2	0
393	8	5	15	0	0	0	0	0	0	0	0	0	0	0	0	1	1	0	0	0	0	3.377	12.4987	32.3488	4		0	0	0	0	2	0
394	4	4	10	0	0	0	0	0	0	0	0	0	0	0	0	2	0	0	0	0	0	4.22928	14.7989	36.8678	4		0	0	0	0	2	0
395	4	4	10	0	0	0	0	0	0	0	0	0	0	0	0	1	1	0	0	0	0	4.13116	12.7974	30.7223	4		0	0	0	0	2	0
396	8	8	18	0	0	0	0	0	0	0	0	0	0	0	0	2	0	0	0	0	0	3.92777	10.4008	33.0007	4		0	0	0	0	2	0
397	8	8	18	0	0	0	0	0	0	0	0	0	0	0	0	1	1	0	0	0	0	3.35687	11.1025	35.3866	4		0	0	0	0	2	0
398	10	6	18	0	0	0	0	0	0	0	0	0	0	0	0	2	0	0	0	0	0	4.71314	14.1273	37.5374	4		0	0	0	0	2	0
399	10	6	18	0	0	0	0	0	0	0	0	0	0	0	0	1	1	0	0	0	0	3.82356	13.5287	37.9207	4		0	0	0	0	2	0
400	10	6	18	0	0	0	0	0	0	0	0	0	0	0	0	0	2	0	0	0	0	3.2292	11.1774	35.5278	4		0	0	0	0	2	0
401	9	5	17	0	0	0	0	0	0	0	0	0	0	0	0	2	0	0	0	0	0	4.12051	12.2607	31.6722	4		0	0	0	0	2	0
402	9	5	17	0	0	0	0	0	0	0	0	0	0	0	0	1	1	0	0	0	0	2.76139	14.4677	34.3166	4		0	0	0	0	2	0
403	9	5	17	0	0	0	0	0	0	0	0	0	0	0	0	0	2	0	0	0	0	2.79458	10.9544	33.6442	4		0	0	0	0	2	0
404	8	5	16	0	0	0	0	0	0	0	0	0	0	0	0	2	0	0	0	0	0	3.14957	12.0431	36.2704	4		0	0	0	0	2	0
405	8	5	16	0	0	0	0	0	0	0	0	0	0	0	0	1	1	0	0	0	0	3.82921	12.8797	39.8069	4		0	0	0	0	2	0
406	8	5	16	0	0	0	0	0	0	0	0	0	0	0	0	0	2	0	0	0	0	2.87153	11.093	34.9207	4		0	0	0	0	2	0
407	8	5	16	0	0	0	0	0	0	0	0	0	0	0	0	3	0	0	0	0	0	4.03159	12.6611	39.7838	4		0	0	0	0	3	0
408	8	5	16	0	0	0	0	0	0	0	0	0	0	0	0	2	1	0	0	0	0	3.68794	12.2136	35.532	4		0	0	0	0	3	0
409	8	5	16	0	0	0	0	0	0	0	0	0	0	0	0	2	1	0	0	0	0	3.44477	11.934	32.6363	4		0	0	0	0	3	0
410	8	5	16	0	0	0	0	0	0	0	0	0	0	0	0	1	2	0	0	0	0	3.34667	13.8375	33.1459	4		0	0	0	0	3	0
411	8	5	16	0	0	0	0	0	0	0	0	0	0	0	0	1	2	0	0	0	0	4.31529	14.5571	33.8489	4		0	0	0	0	3	0
412	8	5	16	0	0	0	0	0	0	0	0	0	0	0	0	0	3	0	0	0	0	3.34788	14.5721	33.5999	4		0	0	0	0	3	0
413	4	1	8	0	0	0	0	0	0	0	0	0	0	0	0	1	0	0	0	0	0	3.42477	12.7993	35.0028	4		0	0	0	0	1	0
414	4	1	8	0	0	0	0	0	0	0	0	0	0	0	0	0	1	0	0	0	0	4.34494	12.7621	36.4898	4		0	0	0	0	1	0
415	8	3	14	0	0	0	0	0	0	0	0	0	0	0	0	1	0	0	0	0	0	4.29309	13.2201	38.6158	4		0	0	0	0	1	0
416	8	3	14	0	0	0	0	0	0	0	0	0	0	0	0	0	1	0	0	0	0	4.10417	10.3337	34.0209	4		0	0	0	0	1	0
417	12	5	20	0	0	0	0	0	0	0	0	0	0	0	0	1	0	0	0	0	0	3.79009	11.6086	35.5496	4		0	0	0	0	1	0
418	12	5	20	0	0	0	0	0	0	0	0	0	0	0	0	0	1	0	0	0	0	3.74944	11.1302	31.8246	4		0	0	0	0	1	0
419	8	5	14	0	0	0	0	0	0	0	0	0	0	0	0	1	0	0	0	0	0	2.9676	13.0857	39.8368	4		0	0	0	0	1	0
420	8	5	14	0	0	0	0	0	0	0	0	0	0	0	0	0	1	0	0	0	0	3.12151	12.7145	31.2062	4		0	0	0	0	1	0
421	10	6	17	0	0	0	0	0	0	0	0	0	0	0	0	1	0	0	0	0	0	4.85822	13.6067	39.894	4		0	0	0	0	1	0
422	10	6	17	0	0	0	0	0	0	0	0	0	0	0	0	0	1	0	0	0	0	3.75418	10.618	32.1319	4		0	0	0	0	1	0
423	7	4	13	0	0	0	0	0	0	0	0	0	0	0	0	1	0	0	0	0	0	3.40264	13.1634	35.2044	4		0	0	0	0	1	0
424	7	4	13	0	0	0	0	0	0	0	0	0	0	0	0	0	1	0	0	0	0	3.33699	12.343	36.9574	4		0	0	0	0	1	0
425	6	3	12	0	0	0	0	0	0	0	0	0	0	0	0	1	0	0	0	0	0	4.49752	13.0657	36.8369	4		0	0	0	0	1	0
426	6	3	12	0	0	0	0	0	0	0	0	0	0	0	0	0	1	0	0	0	0	4.46359	11.2228	38.751	4		0	0	0	0	1	0
427	8	5	17	0	0	0	0	0	0	0	0	0	0	0	0	2	0	0	0	0	0	4.87292	10.9864	36.5969	4		0	0	0	0	2	0
428	8	5	17	0	0	0	0	0	0	0	0	0	0	0	0	1	1	0	0	0	0	3.85416	12.5905	37.7219	4		0	0	0	0	2	0
429	8	5	17	0	0	0	0	0	0	0	0	0	0	0	0	1	1	0	0	0	0	3.07588	13.4623	38.454	4		0	0	0	0	2	0
430	8	5	17	0	0	0	0	0	0	0	0	0	0	0	0	0	2	0	0	0	0	2.89655	12.1274	31.7503	4		0	0	0	0	2	0
431	9	5	19	0	0	0	0	0	0	0	0	0	0	0	0	2	0	0	0	0	0	3.90741	13.183	38.5189	4		0	0	0	0	2	0
432	9	5	19	0	0	0	0	0	0	0	0	0	0	0	0	1	1	0	0	0	0	4.4274	14.8988	33.2008	4		0	0	0	0	2	0
433	9	5	19	0	0	0	0	0	0	0	0	0	0	0	0	1	1	0	0	0	0	4.17531	13.2277	37.9191	4		0	0	0	0	2	0
434	9	5	19	0	0	0	0	0	0	0	0	0	0	0	0	0	2	0	0	0	0	3.77269	11.9175	36.9416	4		0	0	0	0	2	0
435	8	5	16	0	0	0	0	0	0	0	0	0	0	0	0	1	0	0	0	0	0	3.41166	11.6993	37.8669	4		0	0	0	0	1	0
436	8	5	16	0	0	0	0	0	0	0	0	0	0	0	0	0	1	0	0	0	0	4.68697	10.9174	36.5755	4		0	0	0	0	1	0
437	4	4	9	0	0	0	0	0	0	0	0	0	0	0	0	1	0	0	0	0	0	4.33274	12.9436	35.5599	4		0	0	0	0	1	0
438	4	4	9	0	0	0	0	0	0	0	0	0	0	0	0	0	1	0	0	0	0	3.22953	12.9735	36.4056	4		0	0	0	0	1	0
439	6	5	12	0	0	0	0	0	0	0	0	0	0	0	0	1	0	0	0	0	0	4.50858	14.866	34.1095	4		0	0	0	0	1	0
440	6	5	12	0	0	0	0	0	0	0	0	0	0	0	0	0	1	0	0	0	0	3.41058	12.9169	34.5432	4		0	0	0	0	1	0
441	5	4	11	0	0	0	0	0	0	0	0	0	0	0	0	1	0	0	0	0	0	4.90915	11.6013	35.7468	4		0	0	0	0	1	0
442	5	4	11	0	0	0	0	0	0	0	0	0	0	0	0	0	1	0	0	0	0	3.17658	12.3449	32.9692	4		0	0	0	0	1	0
443	7	5	15	0	0	0	0	0	0	0	0	0	0	0	0	1	0	0	0	0	0	4.42335	13.4766	34.0488	4		0	0	0	0	1	0
444	7	5	15	0	0	0	0	0	0	0	0	0	0	0	0	0	1	0	0	0	0	3.30184	12.8723	36.9856	4		0	0	0	0	1	0
445	7	5	15	0	0	0	0	0	0	0	0	0	0	0	0	1	0	0	0	0	0	3.25639	12.5867	34.9314	4		0	0	0	0	1	0
446	7	5	15	0	0	0	0	0	0	0	0	0	0	0	0	0	1	0	0	0	0	3.35432	11.6764	36.7404	4		0	0	0	0	1	0
447	7	5	15	0	0	0	0	0	0	0	0	0	0	0	0	2	0	0	0	0	0	4.64151	14.4515	31.6061	4		0	0	0	0	2	0
448	7	5	15	0	0	0	0	0	0	0	0	0	0	0	0	1	1	0	0	0	0	3.05792	11.9891	37.0276	4		0	0	0	0	2	0
449	7	5	15	0	0	0	0	0	0	0	0	0	0	0	0	1	1	0	0	0	0	3.53673	13.1796	36.9151	4		0	0	0	0	2	0
450	7	5	15	0	0	0	0	0	0	0	0	0	0	0	0	0	2	0	0	0	0	4.0839	10.9533	32.17	4		0	0	0	0	2	0
451	11	7	20	0	0	0	0	0	0	0	0	0	0	0	0	1	0	0	0	0	0	4.33199	10.716	33.4518	4		0	0	0	0	1	0
452	11	7	20	0	0	0	0	0	0	0	0	0	0	0	0	0	1	0	0	0	0	4.54595	11.0157	39.5547	4		0	0	0	0	1	0
453	11	8	23	0	0	0	0	0	0	0	0	0	0	0	0	2	0	0	0	0	0	4.66282	12.279	30.4624	4		0	0	0	0	2	0
454	11	8	23	0	0	0	0	0	0	0	0	0	0	0	0	1	1	0	0	0	0	4.28804	13.0481	38.4537	4		0	0	0	0	2	0
455	11	8	23	0	0	0	0	0	0	0	0	0	0	0	0	1	1	0	0	0	0	3.689	12.2097	33.3736	4		0	0	0	0	2	0
456	11	8	23	0	0	0	0	0	0	0	0	0	0	0	0	0	2	0	0	0	0	4.37359	11.1124	36.6428	4		0	0	0	0	2	0
457	6	8	15	0	0	0	0	0	0	0	0	0	0	0	0	1	0	0	0	0	0	3.20236	12.8208	35.1152	4		0	0	0	0	1	0
458	6	8	15	0	0	0	0	0	0	0	0	0	0	0	0	0	1	0	0	0	0	4.04262	13.0271	35.393	4		0	0	0	0	1	0
459	4	6	13	0	0	0	0	0	0	0	0	0	0	0	0	1	0	0	0	0	0	4.10429	14.6195	37.7719	4		0	0	0	0	1	0
460	4	6	13	0	0	0	0	0	0	0	0	0	0	0	0	0	1	0	0	0	0	3.87898	11.8872	33.3248	4		0	0	0	0	1	0
461	7	8	18	0	0	0	0	0	0	0	0	0	0	0	0	1	0	0	0	0	0	3.21536	12.8008	30.8183	4		0	0	0	0	1	0
462	7	8	18	0	0	0	0	0	0	0	0	0	0	0	0	0	1	0	0	0	0	4.62143	12.3143	31.5053	4		0	0	0	0	1	0
463	10	11	23	0	0	0	0	0	0	0	0	0	0	0	0	2	0	0	0	0	0	3.89074	14.8023	36.9854	4		0	0	0	0	2	0
464	10	11	23	0	0	0	0	0	0	0	0	0	0	0	0	1	1	0	0	0	0	3.01895	13.2083	37.709	4		0	0	0	0	2	0
465	10	11	23	0	0	0	0	0	0	0	0	0	0	0	0	1	1	0	0	0	0	4.12556	10.467	37.0289	4		0	0	0	0	2	0
466	10	11	23	0	0	0	0	0	0	0	0	0	0	0	0	0	2	0	0	0	0	3.26013	11.5064	32.3424	4		0	0	0	0	2	0
467	4	2	7	0	0	0	0	0	0	0	0	0	0	0	0	1	0	0	0	0	0	3.41452	13.8472	33.7254	4		0	0	0	0	1	0
468	4	2	7	0	0	0	0	0	0	0	0	0	0	0	0	0	1	0	0	0	0	3.79489	13.3727	34.3287	4		0	0	0	0	1	0
469	6	3	10	0	0	0	0	0	0	0	0	0	0	0	0	1	0	0	0	0	0	3.93658	13.6606	33.0421	4		0	0	0	0	1	0
470	6	3	10	0	0	0	0	0	0	0	0	0	0	0	0	0	1	0	0	0	0	3.58927	12.7908	36.0922	4		0	0	0	0	1	0
471	8	4	13	0	0	0	0	0	0	0	0	0	0	0	0	1	0	0	0	0	0	4.39381	13.4899	36.5416	4		0	0	0	0	1	0
472	8	4	13	0	0	0	0	0	0	0	0	0	0	0	0	0	1	0	0	0	0	4.26165	11.0907	32.5035	4		0	0	0	0	1	0
473	10	5	16	0	0	0	0	0	0	0	0	0	0	0	0	1	0	0	0	0	0	3.31592	11.7419	35.4702	4		0	0	0	0	1	0
474	10	5	16	0	0	0	0	0	0	0	0	0	0	0	0	0	1	0	0	0	0	4.70867	12.344	32.8774	4		0	0	0	0	1	0
475	8	4	14	0	0	0	0	0	0	0	0	0	0	0	0	2	0	0	0	0	0	3.94381	12.8678	32.6841	4		0	0	0	0	2	0
476	8	4	14	0	0	0	0	0	0	0	0	0	0	0	0	1	1	0	0	0	0	3.34537	13.2208	32.513	4		0	0	0	0	2	0
477	8	4	14	0	0	0	0	0	0	0	0	0	0	0	0	0	2	0	0	0	0	3.26544	12.3916	34.5524	4		0	0	0	0	2	0
478	20	10	32	0	0	0	0	0	0	0	0	0	0	0	0	2	0	0	0	0	0	4.41539	12.9459	36.6665	4		0	0	0	0	2	0
479	20	10	32	0	0	0	0	0	0	0	0	0	0	0	0	0	2	0	0	0	0	4.04288	13.0661	36.4096	4		0	0	0	0	2	0
480	24	12	38	0	0	0	0	0	0	0	0	0	0	0	0	2	0	0	0	0	0	3.87301	13.2016	33.5603	4		0	0	0	0	2	0
481	24	12	38	0	0	0	0	0	0	0	0	0	0	0	0	0	2	0	0	0	0	3.28358	11.9027	38.0558	4		0	0	0	0	2	0
482	18	9	30	0	0	0	0	0	0	0	0	0	0	0	0	3	0	0	0	0	0	3.89398	12.874	36.222	4		0	0	0	0	3	0
483	18	9	30	0	0	0	0	0	0	0	0	0	0	0	0	0	3	0	0	0	0	3.4911	11.3947	35.7318	4		0	0	0	0	3	0
484	8	5	15	0	0	0	0	0	0	0	0	0	0	0	0	2	0	0	0	0	0	3.85931	14.4825	35.131	4		0	0	0	0	2	0
485	8	5	15	0	0	0	0	0	0	0	0	0	0	0	0	0	2	0	0	0	0	3.71964	13.1588	31.2237	4		0	0	0	0	2	0
486	8	6	16	0	0	0	0	0	0	0	0	0	0	0	0	2	0	0	0	0	0	4.0163	12.5422	32.6329	4		0	0	0	0	2	0
487	8	6	16	0	0	0	0	0	0	0	0	0	0	0	0	0	2	0	0	0	0	2.94209	12.6326	33.7716	4		0	0	0	0	2	0
488	7	5	15	0	0	0	0	0	0	0	0	0	0	0	0	2	0	0	0	0	0	3.628	13.467	30.9517	4		0	0	0	0	2	0
489	7	5	15	0	0	0	0	0	0	0	0	0	0	0	0	0	2	0	0	0	0	3.91067	12.2333	31.7322	4		0	0	0	0	2	0
490	8	5	16	0	0	0	0	0	0	0	0	0	0	0	0	1	0	0	0	0	0	3.99622	12.8515	33.2574	4		0	0	0	0	1	0
491	8	5	16	0	0	0	0	0	0	0	0	0	0	0	0	0	1	0	0	0	0	3.66925	12.2965	37.8595	4		0	0	0	0	1	0
492	7	5	15	0	0	0	0	0	0	0	0	0	0	0	0	1	0	0	0	0	0	4.19829	13.5007	37.0143	4		0	0	0	0	1	0
493	7	5	15	0	0	0	0	0	0	0	0	0	0	0	0	0	1	0	0	0	0	3.21824	13.2052	33.7406	4		0	0	0	0	1	0
494	6	2	10	0	0	0	0	0	0	0	0	0	0	0	0	1	0	0	0	0	0	3.20841	13.4338	34.8554	4		0	0	0	0	1	0
495	6	2	10	0	0	0	0	0	0	0	0	0	0	0	0	0	1	0	0	0	0	4.03535	10.3248	34.8111	4		0	0	0	0	1	0
496	10	4	16	0	0	0	0	0	0	0	0	0	0	0	0	1	0	0	0	0	0	3.11917	12.6619	38.1781	4		0	0	0	0	1	0
497	10	4	16	0	0	0	0	0	0	0	0	0	0	0	0	0	1	0	0	0	0	4.3708	10.7121	31.0047	4		0	0	0	0	1	0
498	8	4	14	0	0	0	0	0	0	0	0	0	0	0	0	1	0	0	0	0	0	4.52534	14.8143	39.6315	4		0	0	0	0	1	0
499	8	4	14	0	0	0	0	0	0	0	0	0	0	0	0	0	1	0	0	0	0	4.15851	12.1322	34.5155	4		0	0	0	0	1	0
500	12	5	19	0	0	0	0	0	0	0	0	0	0	0	0	1	0	0	0	0	0	3.95768	11.8101	34.5974	4		0	0	0	0	1	0
501	12	5	19	0	0	0	0	0	0	0	0	0	0	0	0	0	1	0	0	0	0	4.00366	14.1532	31.6998	4		0	0	0	0	1	0
502	8	7	17	0	0	0	0	0	0	0	0	0	0	0	0	1	0	0	0	0	0	4.11954	11.3452	32.7503	4		0	0	0	0	1	0
503	8	7	17	0	0	0	0	0	0	0	0	0	0	0	0	0	1	0	0	0	0	3.22065	11.4172	36.232	4		0	0	0	0	1	0
504	10	5	17	0	0	0	0	0	0	0	0	0	0	0	0	1	0	0	0	0	0	3.33944	11.9033	35.9194	4		0	0	0	0	1	0
505	10	5	17	0	0	0	0	0	0	0	0	0	0	0	0	0	1	0	0	0	0	4.33559	11.9786	35.9526	4		0	0	0	0	1	0
506	5	4	13	0	0	0	0	0	0	0	0	0	0	0	0	1	0	0	0	0	0	4.3437	10.932	33.8902	4		0	0	0	0	1	0
507	5	4	13	0	0	0	0	0	0	0	0	0	0	0	0	0	1	0	0	0	0	4.73786	13.3515	33.8629	4		0	0	0	0	1	0
508	6	2	11	0	0	0	0	0	0	0	0	0	0	0	0	1	0	0	0	0	0	4.57731	10.3952	37.0619	4		0	0	0	0	1	0
509	6	2	11	0	0	0	0	0	0	0	0	0	0	0	0	0	1	0	0	0	0	3.7341	12.0494	37.0542	4		0	0	0	0	1	0
510	10	4	17	0	0	0	0	0	0	0	0	0	0	0	0	1	0	0	0	0	0	3.99006	12.1451	31.7749	4		0	0	0	0	1	0
511	10	4	17	0	0	0	0	0	0	0	0	0	0	0	0	0	1	0	0	0	0	4.13283	10.172	35.0345	4		0	0	0	0	1	0
512	8	4	15	0	0	0	0	0	0	0	0	0	0	0	0	1	0	0	0	0	0	4.8724	11.3635	31.5312	4		0	0	0	0	1	0
513	8	4	15	0	0	0	0	0	0	0	0	0	0	0	0	0	1	0	0	0	0	4.36499	10.7749	35.245	4		0	0	0	0	1	0
514	12	5	20	0	0	0	0	0	0	0	0	0	0	0	0	1	0	0	0	0	0	3.70255	12.7139	38.0449	4		0	0	0	0	1	0
515	12	5	20	0	0	0	0	0	0	0	0	0	0	0	0	0	1	0	0	0	0	3.99116	11.759	30.1459	4		0	0	0	0	1	0
516	8	7	18	0	0	0	0	0	0	0	0	0	0	0	0	1	0	0	0	0	0	3.76458	12.2944	33.4507	4		0	0	0	0	1	0
517	8	7	18	0	0	0	0	0	0	0	0	0	0	0	0	0	1	0	0	0	0	4.19071	10.7817	35.8532	4		0	0	0	0	1	0
518	10	5	18	0	0	0	0	0	0	0	0	0	0	0	0	1	0	0	0	0	0	3.89272	11.6824	33.0676	4		0	0	0	0	1	0
519	10	5	18	0	0	0	0	0	0	0	0	0	0	0	0	0	1	0	0	0	0	4.17362	13.593	31.0998	4		0	0	0	0	1	0
520	5	4	14	0	0	0	0	0	0	0	0	0	0	0	0	1	0	0	0	0	0	4.22879	12.2417	36.5802	4		0	0	0	0	1	0
521	5	4	14	0	0	0	0	0	0	0	0	0	0	0	0	0	1	0	0	0	0	4.81831	14.5871	32.3851	4		0	0	0	0	1	0
522	6	4	13	0	0	0	0	0	0	0	0	0	0	0	0	1	0	0	0	0	0	3.1826	13.8456	34.9318	4		0	0	0	0	1	0
523	6	4	13	0	0	0	0	0	0	0	0	0	0	0	0	0	1	0	0	0	0	3.04838	14.253	31.8227	4		0	0	0	0	1	0
524	4	4	12	0	0	0	0	0	0	0	0	0	0	0	0	1	0	0	0	0	0	3.15163	11.1826	32.5296	4		0	0	0	0	1	0
525	4	4	12	0	0	0	0	0	0	0	0	0	0	0	0	0	1	0	0	0	0	4.85877	13.1651	37.2885	4		0	0	0	0	1	0
526	0	1	3	0	0	0	0	0	0	0	0	0	0	0	0	1	0	0	0	0	0	3.64305	14.1178	32.8492	4		0	0	0	0	1	0
527	0	1	3	0	0	0	0	0	0	0	0	0	0	0	0	1	0	0	0	0	0	3.06197	14.6587	36.5015	4		0	0	0	0	1	0
528	0	1	3	0	0	0	0	0	0	0	0	0	0	0	0	0	1	0	0	0	0	4.71745	11.957	35.1726	4		0	0	0	0	1	0
529	0	1	3	0	0	0	0	0	0	0	0	0	0	0	0	0	1	0	0	0	0	3.94069	14.6731	36.05	4		0	0	0	0	1	0
530	6	2	10	0	0	0	0	0	0	0	0	0	1	0	0	0	0	1	0	0	0	3.76343	12.1358	34.2453	4		0	0	0	1	0	1
531	6	2	10	0	0	0	0	0	0	0	0	0	1	0	0	0	0	0	1	0	0	3.77055	12.7902	35.674	4		0	0	0	1	0	1
532	6	2	10	0	0	0	0	0	0	0	0	0	1	0	0	0	0	0	0	1	0	4.70049	14.2642	32.4935	4		0	0	0	1	0	1
533	6	2	10	0	0	0	0	0	0	0	0	0	0	1	0	0	0	1	0	0	0	4.37554	12.9728	35.7448	4		0	0	0	1	0	1
534	6	2	10	0	0	0	0	0	0	0	0	0	0	1	0	0	0	0	1	0	0	3.55255	11.6854	37.4343	4		0	0	0	1	0	1
535	6	2	10	0	0	0	0	0	0	0	0	0	0	1	0	0	0	0	0	1	0	3.36218	14.6235	36.1489	4		0	0	0	1	0	1
536	6	2	10	0	0	0	0	0	0	0	0	0	0	0	1	0	0	1	0	0	0	3.93256	14.9093	30.3628	4		0	0	0	1	0	1
537	6	2	10	0	0	0	0	0	0	0	0	0	0	0	1	0	0	0	1	0	0	3.11449	11.721	32.3457	4		0	0	0	1	0	1
538	6	2	10	0	0	0	0	0	0	0	0	0	0	0	1	0	0	0	0	1	0	4.24165	12.2084	32.6922	4		0	0	0	1	0	1
539	5	3	13	0	0	0	0	0	0	0	0	0	1	0	0	0	0	4	0	0	0	4.00512	12.769	36.2715	4		0	0	0	1	0	4
540	5	3	13	0	0	0	0	0	0	0	0	0	1	0	0	0	0	0	4	0	0	3.98384	12.7856	30.5382	4		0	0	0	1	0	4
541	5	3	13	0	0	0	0	0	0	0	0	0	1	0	0	0	0	0	0	4	0	3.25469	14.3606	35.8394	4		0	0	0	1	0	4
542	5	3	13	0	0	0	0	0	0	0	0	0	0	1	0	0	0	4	0	0	0	3.85914	10.5183	32.151	4		0	0	0	1	0	4
543	5	3	13	0	0	0	0	0	0	0	0	0	0	1	0	0	0	0	4	0	0	4.21068	13.4586	31.0407	4		0	0	0	1	0	4
544	5	3	13	0	0	0	0	0	0	0	0	0	0	1	0	0	0	0	0	4	0	3.18469	12.1731	34.896	4		0	0	0	1	0	4
545	5	3	13	0	0	0	0	0	0	0	0	0	0	0	1	0	0	4	0	0	0	3.35664	14.7661	35.2727	4		0	0	0	1	0	4
546	5	3	13	0	0	0	0	0	0	0	0	0	0	0	1	0	0	0	4	0	0	3.77025	11.7789	32.1032	4		0	0	0	1	0	4
547	5	3	13	0	0	0	0	0	0	0	0	0	0	0	1	0	0	0	0	4	0	3.69117	12.1864	33.2972	4		0	0	0	1	0	4
548	8	5	19	0	0	0	0	0	0	0	0	0	1	0	0	0	0	5	0	0	0	3.66934	12.2559	37.9078	4		0	0	0	1	0	5
549	8	5	19	0	0	0	0	0	0	0	0	0	1	0	0	0	0	0	5	0	0	3.98141	11.3402	34.0424	4		0	0	0	1	0	5
550	8	5	19	0	0	0	0	0	0	0	0	0	1	0	0	0	0	0	0	5	0	3.84943	13.9325	34.3001	4		0	0	0	1	0	5
551	8	5	19	0	0	0	0	0	0	0	0	0	0	1	0	0	0	5	0	0	0	4.04988	11.8629	34.4056	4		0	0	0	1	0	5
552	8	5	19	0	0	0	0	0	0	0	0	0	0	1	0	0	0	0	5	0	0	3.48403	11.3326	37.4778	4		0	0	0	1	0	5
553	8	5	19	0	0	0	0	0	0	0	0	0	0	1	0	0	0	0	0	5	0	3.10566	13.6207	36.1167	4		0	0	0	1	0	5
554	8	5	19	0	0	0	0	0	0	0	0	0	0	0	1	0	0	5	0	0	0	3.73022	13.1858	34.9305	4		0	0	0	1	0	5
555	8	5	19	0	0	0	0	0	0	0	0	0	0	0	1	0	0	0	5	0	0	3.27191	12.7624	36.0408	4		0	0	0	1	0	5
556	8	5	19	0	0	0	0	0	0	0	0	0	0	0	1	0	0	0	0	5	0	2.83454	14.3862	39.1218	4		0	0	0	1	0	5
557	12	6	20	0	0	0	0	0	0	0	0	0	1	0	0	0	0	1	0	0	0	2.72838	14.5214	38.4284	4		0	0	0	1	0	1
558	12	6	20	0	0	0	0	0	0	0	0	0	1	0	0	0	0	0	1	0	0	3.5753	12.1673	35.3596	4		0	0	0	1	0	1
559	12	6	20	0	0	0	0	0	0	0	0	0	1	0	0	0	0	0	0	1	0	3.6028	13.2235	36.4118	4		0	0	0	1	0	1
560	12	6	20	0	0	0	0	0	0	0	0	0	0	1	0	0	0	1	0	0	0	3.30694	12.9682	34.8061	4		0	0	0	1	0	1
561	12	6	20	0	0	0	0	0	0	0	0	0	0	1	0	0	0	0	1	0	0	3.88488	13.1945	32.2202	4		0	0	0	1	0	1
562	12	6	20	0	0	0	0	0	0	0	0	0	0	1	0	0	0	0	0	1	0	3.69937	12.6726	38.8482	4		0	0	0	1	0	1
563	12	6	20	0	0	0	0	0	0	0	0	0	0	0	1	0	0	1	0	0	0	3.97413	14.6558	36.247	4		0	0	0	1	0	1
564	12	6	20	0	0	0	0	0	0	0	0	0	0	0	1	0	0	0	1	0	0	3.22058	12.0222	31.3933	4		0	0	0	1	0	1
565	12	6	20	0	0	0	0	0	0	0	0	0	0	0	1	0	0	0	0	1	0	4.38039	12.6774	34.7081	4		0	0	0	1	0	1
566	9	3	15	0	0	0	0	0	0	0	0	0	1	0	0	0	0	2	0	0	0	3.91126	14.6778	38.2369	4		0	0	0	1	0	2
567	9	3	15	0	0	0	0	0	0	0	0	0	1	0	0	0	0	0	2	0	0	2.71454	14.1512	33.2252	4		0	0	0	1	0	2
568	9	3	15	0	0	0	0	0	0	0	0	0	1	0	0	0	0	0	0	2	0	3.74395	14.4938	33.1638	4		0	0	0	1	0	2
569	9	3	15	0	0	0	0	0	0	0	0	0	0	1	0	0	0	2	0	0	0	4.30715	12.8217	35.1255	4		0	0	0	1	0	2
570	9	3	15	0	0	0	0	0	0	0	0	0	0	1	0	0	0	0	2	0	0	3.75112	12.2642	37.5216	4		0	0	0	1	0	2
571	9	3	15	0	0	0	0	0	0	0	0	0	0	1	0	0	0	0	0	2	0	3.68592	11.73	36.0126	4		0	0	0	1	0	2
572	9	3	15	0	0	0	0	0	0	0	0	0	0	0	1	0	0	2	0	0	0	3.39892	12.0683	35.6844	4		0	0	0	1	0	2
573	9	3	15	0	0	0	0	0	0	0	0	0	0	0	1	0	0	0	2	0	0	3.29984	10.9148	33.007	4		0	0	0	1	0	2
574	9	3	15	0	0	0	0	0	0	0	0	0	0	0	1	0	0	0	0	2	0	3.67691	11.8713	35.3509	4		0	0	0	1	0	2
575	2	2	8	0	0	0	0	0	0	0	0	0	1	0	0	0	0	3	0	0	0	4.14892	11.2239	33.0279	4		0	0	0	1	0	3
576	2	2	8	0	0	0	0	0	0	0	0	0	1	0	0	0	0	0	3	0	0	3.90308	12.6779	36.1739	4		0	0	0	1	0	3
577	2	2	8	0	0	0	0	0	0	0	0	0	1	0	0	0	0	0	0	3	0	3.68468	13.034	37.3992	4		0	0	0	1	0	3
578	2	2	8	0	0	0	0	0	0	0	0	0	0	1	0	0	0	3	0	0	0	3.42263	13.8791	30.5952	4		0	0	0	1	0	3
579	2	2	8	0	0	0	0	0	0	0	0	0	0	1	0	0	0	0	3	0	0	4.41059	12.933	33.848	4		0	0	0	1	0	3
580	2	2	8	0	0	0	0	0	0	0	0	0	0	1	0	0	0	0	0	3	0	3.38868	12.5951	38.9623	4		0	0	0	1	0	3
581	2	2	8	0	0	0	0	0	0	0	0	0	0	0	1	0	0	3	0	0	0	4.05889	13.925	33.1384	4		0	0	0	1	0	3
582	2	2	8	0	0	0	0	0	0	0	0	0	0	0	1	0	0	0	3	0	0	4.1686	13.5703	34.1412	4		0	0	0	1	0	3
583	2	2	8	0	0	0	0	0	0	0	0	0	0	0	1	0	0	0	0	3	0	3.66217	12.8043	32.5914	4		0	0	0	1	0	3
584	16	18	41	0	0	0	0	0	0	1	0	0	0	0	0	0	0	6	0	0	0	3.99333	13.1885	35.7821	4		0	0	1	0	0	6
585	16	18	41	0	0	0	0	0	0	1	0	0	0	0	0	0	0	0	6	0	0	3.5136	10.4753	36.2207	4		0	0	1	0	0	6
586	16	18	41	0	0	0	0	0	0	1	0	0	0	0	0	0	0	0	0	6	0	3.41596	13.3107	37.3081	4		0	0	1	0	0	6
587	16	18	41	0	0	0	0	0	0	0	1	0	0	0	0	0	0	6	0	0	0	3.17494	13.4986	35.1916	4		0	0	1	0	0	6
588	16	18	41	0	0	0	0	0	0	0	1	0	0	0	0	0	0	0	6	0	0	4.05452	11.6038	34.0653	4		0	0	1	0	0	6
589	16	18	41	0	0	0	0	0	0	0	1	0	0	0	0	0	0	0	0	6	0	4.21722	14.3067	36.8167	4		0	0	1	0	0	6
590	16	18	41	0	0	0	0	0	0	0	0	1	0	0	0	0	0	6	0	0	0	3.62907	12.9115	37.4198	4		0	0	1	0	0	6
591	16	18	41	0	0	0	0	0	0	0	0	1	0	0	0	0	0	0	6	0	0	3.61944	13.3768	36.3921	4		0	0	1	0	0	6
592	16	18	41	0	0	0	0	0	0	0	0	1	0	0	0	0	0	0	0	6	0	3.12151	13.3717	36.3815	4		0	0	1	0	0	6
593	18	18	41	0	0	0	0	0	0	1	0	0	0	0	0	0	0	2	2	0	0	3.06084	13.4115	37.5253	4		0	0	1	0	0	4
594	18	18	41	0	0	0	0	0	0	1	0	0	0	0	0	0	0	2	0	2	0	4.21486	10.862	31.0219	4		0	0	1	0	0	4
595	18	18	41	0	0	0	0	0	0	1	0	0	0	0	0	0	0	0	2	2	0	3.77639	13.4453	33.6297	4		0	0	1	0	0	4
596	18	18	41	0	0	0	0	0	0	0	1	0	0	0	0	0	0	2	2	0	0	4.07316	14.7711	33.4181	4		0	0	1	0	0	4
597	18	18	41	0	0	0	0	0	0	0	1	0	0	0	0	0	0	2	0	2	0	3.86737	13.7514	34.2705	4		0	0	1	0	0	4
598	18	18	41	0	0	0	0	0	0	0	1	0	0	0	0	0	0	0	2	2	0	3.39943	12.8278	38.4401	4		0	0	1	0	0	4
599	18	18	41	0	0	0	0	0	0	0	0	1	0	0	0	0	0	2	2	0	0	3.08771	10.7867	35.3125	4		0	0	1	0	0	4
600	18	18	41	0	0	0	0	0	0	0	0	1	0	0	0	0	0	2	0	2	0	3.32787	12.5374	34.8612	4		0	0	1	0	0	4
601	18	18	41	0	0	0	0	0	0	0	0	1	0	0	0	0	0	0	2	2	0	3.50275	13.8654	36.0102	4		0	0	1	0	0	4
602	5	6	15	0	0	0	0	0	0	1	0	0	0	0	0	0	0	3	0	0	0	3.71422	12.8428	35.6168	4		0	0	1	0	0	3
603	5	6	15	0	0	0	0	0	0	1	0	0	0	0	0	0	0	0	3	0	0	3.45471	10.7683	39.4043	4		0	0	1	0	0	3
604	5	6	15	0	0	0	0	0	0	1	0	0	0	0	0	0	0	0	0	3	0	3.38453	14.559	31.9302	4		0	0	1	0	0	3
605	5	6	15	0	0	0	0	0	0	0	1	0	0	0	0	0	0	3	0	0	0	4.11939	14.8283	36.6926	4		0	0	1	0	0	3
606	5	6	15	0	0	0	0	0	0	0	1	0	0	0	0	0	0	0	3	0	0	3.01865	13.0824	38.2958	4		0	0	1	0	0	3
607	5	6	15	0	0	0	0	0	0	0	1	0	0	0	0	0	0	0	0	3	0	3.57745	12.3175	33.3664	4		0	0	1	0	0	3
608	5	6	15	0	0	0	0	0	0	0	0	1	0	0	0	0	0	3	0	0	0	3.37278	11.7008	38.0326	4		0	0	1	0	0	3
609	5	6	15	0	0	0	0	0	0	0	0	1	0	0	0	0	0	0	3	0	0	3.39257	11.0948	32.5165	4		0	0	1	0	0	3
610	5	6	15	0	0	0	0	0	0	0	0	1	0	0	0	0	0	0	0	3	0	3.90598	10.8785	31.9911	4		0	0	1	0	0	3
611	3	6	15	0	0	0	0	0	0	1	0	0	0	0	0	0	0	5	0	0	0	3.88621	11.9685	34.19	4		0	0	1	0	0	5
612	3	6	15	0	0	0	0	0	0	1	0	0	0	0	0	0	0	2	3	0	0	4.70414	13.6534	37.7412	4		0	0	1	0	0	5
613	3	6	15	0	0	0	0	0	0	1	0	0	0	0	0	0	0	2	0	3	0	3.6357	10.0876	30.3302	4		0	0	1	0	0	5
614	3	6	15	0	0	0	0	0	0	0	1	0	0	0	0	0	0	5	0	0	0	4.70763	14.149	36.6653	4		0	0	1	0	0	5
615	3	6	15	0	0	0	0	0	0	0	1	0	0	0	0	0	0	2	3	0	0	4.01233	12.0404	38.3732	4		0	0	1	0	0	5
616	3	6	15	0	0	0	0	0	0	0	1	0	0	0	0	0	0	2	0	3	0	4.62461	12.3333	36.2427	4		0	0	1	0	0	5
617	3	6	15	0	0	0	0	0	0	0	0	1	0	0	0	0	0	5	0	0	0	3.4144	12.3353	36.3243	4		0	0	1	0	0	5
618	3	6	15	0	0	0	0	0	0	0	0	1	0	0	0	0	0	2	3	0	0	3.76493	11.4784	39.4257	4		0	0	1	0	0	5
619	3	6	15	0	0	0	0	0	0	0	0	1	0	0	0	0	0	2	0	3	0	4.63095	13.4175	31.215	4		0	0	1	0	0	5
620	11	14	31	0	0	0	0	0	0	1	0	0	0	0	0	0	0	5	0	0	0	3.45643	11.3042	33.8304	4		0	0	1	0	0	5
621	11	14	31	0	0	0	0	0	0	1	0	0	0	0	0	0	0	0	5	0	0	3.97378	14.0574	34.3071	4		0	0	1	0	0	5
622	11	14	31	0	0	0	0	0	0	1	0	0	0	0	0	0	0	0	0	5	0	3.57185	12.9532	35.4301	4		0	0	1	0	0	5
623	11	14	31	0	0	0	0	0	0	0	1	0	0	0	0	0	0	5	0	0	0	4.94221	13.3414	38.0583	4		0	0	1	0	0	5
624	11	14	31	0	0	0	0	0	0	0	1	0	0	0	0	0	0	0	5	0	0	3.77809	14.2934	36.0682	4		0	0	1	0	0	5
625	11	14	31	0	0	0	0	0	0	0	1	0	0	0	0	0	0	0	0	5	0	4.52925	13.133	35.1645	4		0	0	1	0	0	5
626	11	14	31	0	0	0	0	0	0	0	0	1	0	0	0	0	0	5	0	0	0	3.84615	10.9736	31.5348	4		0	0	1	0	0	5
627	11	14	31	0	0	0	0	0	0	0	0	1	0	0	0	0	0	0	5	0	0	3.87118	10.4339	36.6202	4		0	0	1	0	0	5
628	11	14	31	0	0	0	0	0	0	0	0	1	0	0	0	0	0	0	0	5	0	3.35397	13.5387	32.7108	4		0	0	1	0	0	5
629	7	7	18	0	0	0	0	0	0	1	0	0	0	0	0	0	0	3	0	0	0	3.71831	12.2264	31.3733	4		0	0	1	0	0	3
630	7	7	18	0	0	0	0	0	0	1	0	0	0	0	0	0	0	0	3	0	0	4.56301	11.7596	39.4913	4		0	0	1	0	0	3
631	7	7	18	0	0	0	0	0	0	1	0	0	0	0	0	0	0	0	0	3	0	4.45568	14.8344	35.7017	4		0	0	1	0	0	3
632	7	7	18	0	0	0	0	0	0	0	1	0	0	0	0	0	0	3	0	0	0	3.74636	11.5394	38.3112	4		0	0	1	0	0	3
633	7	7	18	0	0	0	0	0	0	0	1	0	0	0	0	0	0	0	3	0	0	3.92746	12.3457	32.0761	4		0	0	1	0	0	3
634	7	7	18	0	0	0	0	0	0	0	1	0	0	0	0	0	0	0	0	3	0	3.36771	14.1116	39.203	4		0	0	1	0	0	3
635	7	7	18	0	0	0	0	0	0	0	0	1	0	0	0	0	0	3	0	0	0	4.51789	12.2592	33.7138	4		0	0	1	0	0	3
636	7	7	18	0	0	0	0	0	0	0	0	1	0	0	0	0	0	0	3	0	0	4.09149	12.5906	38.4239	4		0	0	1	0	0	3
637	7	7	18	0	0	0	0	0	0	0	0	1	0	0	0	0	0	0	0	3	0	3.22268	13.2512	36.9305	4		0	0	1	0	0	3
638	6	8	21	0	0	0	0	0	0	1	0	0	0	0	0	0	0	6	0	0	0	4.23933	11.8341	35.2983	4		0	0	1	0	0	6
639	6	8	21	0	0	0	0	0	0	1	0	0	0	0	0	0	0	0	6	0	0	3.22676	10.0149	31.5989	4		0	0	1	0	0	6
640	6	8	21	0	0	0	0	0	0	1	0	0	0	0	0	0	0	0	0	6	0	3.0644	11.9415	32.9436	4		0	0	1	0	0	6
641	6	8	21	0	0	0	0	0	0	0	1	0	0	0	0	0	0	6	0	0	0	4.06476	12.971	36.3131	4		0	0	1	0	0	6
642	6	8	21	0	0	0	0	0	0	0	1	0	0	0	0	0	0	0	6	0	0	2.59044	13.6506	37.7451	4		0	0	1	0	0	6
643	6	8	21	0	0	0	0	0	0	0	1	0	0	0	0	0	0	0	0	6	0	3.37071	11.0232	37.7702	4		0	0	1	0	0	6
644	6	8	21	0	0	0	0	0	0	0	0	1	0	0	0	0	0	6	0	0	0	3.82011	10.2831	35.3597	4		0	0	1	0	0	6
645	6	8	21	0	0	0	0	0	0	0	0	1	0	0	0	0	0	0	6	0	0	4.57267	12.917	36.1635	4		0	0	1	0	0	6
646	6	8	21	0	0	0	0	0	0	0	0	1	0	0	0	0	0	0	0	6	0	3.81386	12.1621	34.1055	4		0	0	1	0	0	6
647	15	6	23	0	0	0	0	0	0	1	0	0	0	0	0	0	0	1	0	0	0	3.6361	13.1829	38.2194	4		0	0	1	0	0	1
648	15	6	23	0	0	0	0	0	0	1	0	0	0	0	0	0	0	0	1	0	0	3.64453	12.4028	37.9737	4		0	0	1	0	0	1
649	15	6	23	0	0	0	0	0	0	1	0	0	0	0	0	0	0	0	0	1	0	2.78189	11.7852	34.1957	4		0	0	1	0	0	1
650	15	6	23	0	0	0	0	0	0	0	1	0	0	0	0	0	0	1	0	0	0	3.29343	12.2078	37.2452	4		0	0	1	0	0	1
651	15	6	23	0	0	0	0	0	0	0	1	0	0	0	0	0	0	0	1	0	0	3.07629	12.1114	35.0226	4		0	0	1	0	0	1
652	15	6	23	0	0	0	0	0	0	0	1	0	0	0	0	0	0	0	0	1	0	4.12368	11.5429	36.5483	4		0	0	1	0	0	1
653	15	6	23	0	0	0	0	0	0	0	0	1	0	0	0	0	0	1	0	0	0	3.95951	12.7859	39.6168	4		0	0	1	0	0	1
654	15	6	23	0	0	0	0	0	0	0	0	1	0	0	0	0	0	0	1	0	0	3.97157	11.7019	32.6747	4		0	0	1	0	0	1
655	15	6	23	0	0	0	0	0	0	0	0	1	0	0	0	0	0	0	0	1	0	2.7757	13.5416	35.7963	4		0	0	1	0	0	1
656	12	5	20	0	0	0	0	0	0	1	0	0	0	0	0	0	0	2	0	0	0	4.48201	13.379	33.1836	4		0	0	1	0	0	2
657	12	5	20	0	0	0	0	0	0	1	0	0	0	0	0	0	0	0	2	0	0	3.58714	14.4958	32.474	4		0	0	1	0	0	2
658	12	5	20	0	0	0	0	0	0	1	0	0	0	0	0	0	0	0	0	2	0	4.04918	10.8441	30.3595	4		0	0	1	0	0	2
659	12	5	20	0	0	0	0	0	0	0	1	0	0	0	0	0	0	2	0	0	0	4.6378	11.3065	34.4754	4		0	0	1	0	0	2
660	12	5	20	0	0	0	0	0	0	0	1	0	0	0	0	0	0	0	2	0	0	3.0545	12.721	35.3707	4		0	0	1	0	0	2
661	12	5	20	0	0	0	0	0	0	0	1	0	0	0	0	0	0	0	0	2	0	3.9256	11.6155	37.2794	4		0	0	1	0	0	2
662	12	5	20	0	0	0	0	0	0	0	0	1	0	0	0	0	0	2	0	0	0	4.00998	13.5221	38.4574	4		0	0	1	0	0	2
663	12	5	20	0	0	0	0	0	0	0	0	1	0	0	0	0	0	0	2	0	0	3.5147	14.3058	30.9682	4		0	0	1	0	0	2
664	12	5	20	0	0	0	0	0	0	0	0	1	0	0	0	0	0	0	0	2	0	3.11446	12.0933	35.9995	4		0	0	1	0	0	2
665	9	4	17	0	0	0	0	0	0	1	0	0	0	0	0	0	0	3	0	0	0	3.17787	12.3819	35.4437	4		0	0	1	0	0	3
666	9	4	17	0	0	0	0	0	0	1	0	0	0	0	0	0	0	0	3	0	0	3.53714	11.8173	36.6655	4		0	0	1	0	0	3
667	9	4	17	0	0	0	0	0	0	1	0	0	0	0	0	0	0	0	0	3	0	4.26943	11.4249	37.6039	4		0	0	1	0	0	3
668	9	4	17	0	0	0	0	0	0	0	1	0	0	0	0	0	0	3	0	0	0	3.75405	14.3968	32.3753	4		0	0	1	0	0	3
669	9	4	17	0	0	0	0	0	0	0	1	0	0	0	0	0	0	0	3	0	0	3.04073	10.3672	34.0183	4		0	0	1	0	0	3
670	9	4	17	0	0	0	0	0	0	0	1	0	0	0	0	0	0	0	0	3	0	3.5106	12.9445	39.2976	4		0	0	1	0	0	3
671	9	4	17	0	0	0	0	0	0	0	0	1	0	0	0	0	0	3	0	0	0	4.08897	13.5808	35.8402	4		0	0	1	0	0	3
672	9	4	17	0	0	0	0	0	0	0	0	1	0	0	0	0	0	0	3	0	0	4.19148	14.7274	34.6999	4		0	0	1	0	0	3
673	9	4	17	0	0	0	0	0	0	0	0	1	0	0	0	0	0	0	0	3	0	4.64337	11.6753	32.2971	4		0	0	1	0	0	3
674	12	6	20	0	0	0	1	0	0	0	0	0	0	0	0	0	0	1	0	0	0	3.21399	10.9156	32.3957	4		0	1	0	0	0	1
675	12	6	20	0	0	0	1	0	0	0	0	0	0	0	0	0	0	0	1	0	0	4.27384	11.3462	31.4747	4		0	1	0	0	0	1
676	12	6	20	0	0	0	1	0	0	0	0	0	0	0	0	0	0	0	0	1	0	3.80073	12.2045	31.9573	4		0	1	0	0	0	1
677	12	6	20	0	0	0	0	1	0	0	0	0	0	0	0	0	0	1	0	0	0	3.41221	13.0251	33.5408	4		0	1	0	0	0	1
678	12	6	20	0	0	0	0	1	0	0	0	0	0	0	0	0	0	0	1	0	0	3.36536	14.4384	33.102	4		0	1	0	0	0	1
679	12	6	20	0	0	0	0	1	0	0	0	0	0	0	0	0	0	0	0	1	0	4.44983	14.7601	30.735	4		0	1	0	0	0	1
680	12	6	20	0	0	0	0	0	1	0	0	0	0	0	0	0	0	1	0	0	0	4.34223	12.2161	30.8638	4		0	1	0	0	0	1
681	12	6	20	0	0	0	0	0	1	0	0	0	0	0	0	0	0	0	1	0	0	3.82177	11.9905	30.8976	4		0	1	0	0	0	1
682	12	6	20	0	0	0	0	0	1	0	0	0	0	0	0	0	0	0	0	1	0	4.21363	13.5081	34.2836	4		0	1	0	0	0	1
683	9	4	16	0	0	0	1	0	0	0	0	0	0	0	0	0	0	2	0	0	0	3.56279	14.2761	33.2294	4		0	1	0	0	0	2
684	9	4	16	0	0	0	1	0	0	0	0	0	0	0	0	0	0	0	2	0	0	3.1529	14.9076	38.3751	4		0	1	0	0	0	2
685	9	4	16	0	0	0	1	0	0	0	0	0	0	0	0	0	0	0	0	2	0	3.40702	12.9543	38.5137	4		0	1	0	0	0	2
686	9	4	16	0	0	0	0	1	0	0	0	0	0	0	0	0	0	2	0	0	0	2.92377	13.5824	35.5759	4		0	1	0	0	0	2
687	9	4	16	0	0	0	0	1	0	0	0	0	0	0	0	0	0	0	2	0	0	3.38233	11.6795	36.876	4		0	1	0	0	0	2
688	9	4	16	0	0	0	0	1	0	0	0	0	0	0	0	0	0	0	0	2	0	4.02752	11.6931	35.7572	4		0	1	0	0	0	2
689	9	4	16	0	0	0	0	0	1	0	0	0	0	0	0	0	0	2	0	0	0	3.60669	12.9923	37.6761	4		0	1	0	0	0	2
690	9	4	16	0	0	0	0	0	1	0	0	0	0	0	0	0	0	0	2	0	0	4.08522	14.7703	30.0108	4		0	1	0	0	0	2
691	9	4	16	0	0	0	0	0	1	0	0	0	0	0	0	0	0	0	0	2	0	3.19911	12.2898	31.1453	4		0	1	0	0	0	2
692	5	6	14	0	0	0	1	0	0	0	0	0	0	0	0	0	0	2	0	0	0	3.5005	10.3472	31.8241	4		0	1	0	0	0	2
693	5	6	14	0	0	0	1	0	0	0	0	0	0	0	0	0	0	0	2	0	0	3.34229	11.0256	36.3029	4		0	1	0	0	0	2
694	5	6	14	0	0	0	1	0	0	0	0	0	0	0	0	0	0	0	0	2	0	3.52347	13.1351	37.0637	4		0	1	0	0	0	2
695	5	6	14	0	0	0	0	1	0	0	0	0	0	0	0	0	0	2	0	0	0	4.74428	11.6569	35.9412	4		0	1	0	0	0	2
696	5	6	14	0	0	0	0	1	0	0	0	0	0	0	0	0	0	0	2	0	0	3.60044	11.7791	38.9539	4		0	1	0	0	0	2
697	5	6	14	0	0	0	0	1	0	0	0	0	0	0	0	0	0	0	0	2	0	4.1892	10.9584	32.8423	4		0	1	0	0	0	2
698	5	6	14	0	0	0	0	0	1	0	0	0	0	0	0	0	0	2	0	0	0	3.54474	14.9366	36.2953	4		0	1	0	0	0	2
699	5	6	14	0	0	0	0	0	1	0	0	0	0	0	0	0	0	0	2	0	0	4.45333	12.514	31.7748	4		0	1	0	0	0	2
700	5	6	14	0	0	0	0	0	1	0	0	0	0	0	0	0	0	0	0	2	0	3.5903	10.8677	31.8071	4		0	1	0	0	0	2
701	8	8	20	0	0	0	1	0	0	0	0	0	0	0	0	0	0	3	0	0	0	3.70541	14.7951	33.3314	4		0	1	0	0	0	3
702	8	8	20	0	0	0	1	0	0	0	0	0	0	0	0	0	0	0	3	0	0	3.66171	12.6085	36.3325	4		0	1	0	0	0	3
703	8	8	20	0	0	0	1	0	0	0	0	0	0	0	0	0	0	0	0	3	0	3.87901	14.9791	38.4932	4		0	1	0	0	0	3
704	8	8	20	0	0	0	0	1	0	0	0	0	0	0	0	0	0	3	0	0	0	3.63951	14.1405	39.5247	4		0	1	0	0	0	3
705	8	8	20	0	0	0	0	1	0	0	0	0	0	0	0	0	0	0	3	0	0	3.45088	14.2613	30.0006	4		0	1	0	0	0	3
706	8	8	20	0	0	0	0	1	0	0	0	0	0	0	0	0	0	0	0	3	0	3.55156	11.4115	39.0477	4		0	1	0	0	0	3
707	8	8	20	0	0	0	0	0	1	0	0	0	0	0	0	0	0	3	0	0	0	3.62446	13.0323	37.6813	4		0	1	0	0	0	3
708	8	8	20	0	0	0	0	0	1	0	0	0	0	0	0	0	0	0	3	0	0	3.49338	12.776	34.4383	4		0	1	0	0	0	3
709	8	8	20	0	0	0	0	0	1	0	0	0	0	0	0	0	0	0	0	3	0	3.99163	12.1169	33.2006	4		0	1	0	0	0	3
710	4	2	9	1	0	0	0	0	0	0	0	0	0	0	0	0	0	2	0	0	0	3.24637	11.8693	38.5783	4		1	0	0	0	0	2
711	4	2	9	1	0	0	0	0	0	0	0	0	0	0	0	0	0	0	2	0	0	3.71012	12.6719	32.5771	4		1	0	0	0	0	2
712	4	2	9	1	0	0	0	0	0	0	0	0	0	0	0	0	0	0	0	2	0	3.77087	12.9684	33.4477	4		1	0	0	0	0	2
713	4	2	9	0	1	0	0	0	0	0	0	0	0	0	0	0	0	2	0	0	0	4.98971	10.7467	34.2319	4		1	0	0	0	0	2
714	4	2	9	0	1	0	0	0	0	0	0	0	0	0	0	0	0	0	2	0	0	4.24287	12.4489	37.9963	4		1	0	0	0	0	2
715	4	2	9	0	1	0	0	0	0	0	0	0	0	0	0	0	0	0	0	2	0	2.72038	12.8563	34.3628	4		1	0	0	0	0	2
716	4	2	9	0	0	1	0	0	0	0	0	0	0	0	0	0	0	2	0	0	0	3.686	11.6251	33.7363	4		1	0	0	0	0	2
717	4	2	9	0	0	1	0	0	0	0	0	0	0	0	0	0	0	0	2	0	0	4.17446	12.7389	32.0858	4		1	0	0	0	0	2
718	4	2	9	0	0	1	0	0	0	0	0	0	0	0	0	0	0	0	0	2	0	3.17891	12.8489	30.0901	4		1	0	0	0	0	2
719	2	2	9	1	0	0	0	0	0	0	0	0	0	0	0	0	0	4	0	0	0	4.34235	11.8311	36.6474	4		1	0	0	0	0	4
720	2	2	9	1	0	0	0	0	0	0	0	0	0	0	0	0	0	0	4	0	0	3.30894	13.0141	38.1974	4		1	0	0	0	0	4
721	2	2	9	1	0	0	0	0	0	0	0	0	0	0	0	0	0	0	0	4	0	3.85654	10.8635	38.447	4		1	0	0	0	0	4
722	2	2	9	0	1	0	0	0	0	0	0	0	0	0	0	0	0	4	0	0	0	4.08998	10.3006	35.1818	4		1	0	0	0	0	4
723	2	2	9	0	1	0	0	0	0	0	0	0	0	0	0	0	0	0	4	0	0	3.65536	12.2238	30.8218	4		1	0	0	0	0	4
724	2	2	9	0	1	0	0	0	0	0	0	0	0	0	0	0	0	0	0	4	0	3.95368	12.6037	36.3768	4		1	0	0	0	0	4
725	2	2	9	0	0	1	0	0	0	0	0	0	0	0	0	0	0	4	0	0	0	4.31891	11.1996	39.9289	4		1	0	0	0	0	4
726	2	2	9	0	0	1	0	0	0	0	0	0	0	0	0	0	0	0	4	0	0	3.60685	11.5667	34.5964	4		1	0	0	0	0	4
727	2	2	9	0	0	1	0	0	0	0	0	0	0	0	0	0	0	0	0	4	0	3.44593	11.4214	37.0301	4		1	0	0	0	0	4
728	0	2	9	1	0	0	0	0	0	0	0	0	0	0	0	0	0	6	0	0	0	3.93598	12.3946	31.0495	4		1	0	0	0	0	6
729	0	2	9	1	0	0	0	0	0	0	0	0	0	0	0	0	0	0	6	0	0	4.11014	10.9278	33.9333	4		1	0	0	0	0	6
730	0	2	9	1	0	0	0	0	0	0	0	0	0	0	0	0	0	0	0	6	0	3.51786	11.9471	36.828	4		1	0	0	0	0	6
731	0	2	9	0	1	0	0	0	0	0	0	0	0	0	0	0	0	6	0	0	0	3.67999	13.3519	38.7749	4		1	0	0	0	0	6
732	0	2	9	0	1	0	0	0	0	0	0	0	0	0	0	0	0	0	6	0	0	4.19969	14.0135	35.2023	4		1	0	0	0	0	6
733	0	2	9	0	1	0	0	0	0	0	0	0	0	0	0	0	0	0	0	6	0	3.43824	13.2496	33.3438	4		1	0	0	0	0	6
734	0	2	9	0	0	1	0	0	0	0	0	0	0	0	0	0	0	6	0	0	0	3.85816	11.5396	34.5186	4		1	0	0	0	0	6
735	0	2	9	0	0	1	0	0	0	0	0	0	0	0	0	0	0	0	6	0	0	4.26167	11.0539	36.6939	4		1	0	0	0	0	6
736	0	2	9	0	0	1	0	0	0	0	0	0	0	0	0	0	0	0	0	6	0	4.22771	12.9524	35.9584	4		1	0	0	0	0	6
737	7	5	18	1	0	0	0	0	0	0	0	0	0	0	0	0	0	5	0	0	0	3.15727	12.3552	37.5262	4		1	0	0	0	0	5
738	7	5	18	1	0	0	0	0	0	0	0	0	0	0	0	0	0	0	5	0	0	3.71899	13.114	30.9737	4		1	0	0	0	0	5
739	7	5	18	1	0	0	0	0	0	0	0	0	0	0	0	0	0	0	0	5	0	3.21071	12.3135	33.68	4		1	0	0	0	0	5
740	7	5	18	0	1	0	0	0	0	0	0	0	0	0	0	0	0	5	0	0	0	3.45756	14.9085	36.7186	4		1	0	0	0	0	5
741	7	5	18	0	1	0	0	0	0	0	0	0	0	0	0	0	0	0	5	0	0	4.13288	10.978	36.9869	4		1	0	0	0	0	5
742	7	5	18	0	1	0	0	0	0	0	0	0	0	0	0	0	0	0	0	5	0	3.88972	12.8724	36.2634	4		1	0	0	0	0	5
743	7	5	18	0	0	1	0	0	0	0	0	0	0	0	0	0	0	5	0	0	0	3.70234	13.7536	38.3692	4		1	0	0	0	0	5
744	7	5	18	0	0	1	0	0	0	0	0	0	0	0	0	0	0	0	5	0	0	3.69699	14.8874	39.9141	4		1	0	0	0	0	5
745	7	5	18	0	0	1	0	0	0	0	0	0	0	0	0	0	0	0	0	5	0	4.0215	13.0253	35.5096	4		1	0	0	0	0	5
746	8	4	15	1	0	0	0	0	0	0	0	0	0	0	0	0	0	2	0	0	0	3.98642	12.456	35.546	4		1	0	0	0	0	2
747	8	4	15	1	0	0	0	0	0	0	0	0	0	0	0	0	0	0	2	0	0	4.0941	13.4484	32.5744	4		1	0	0	0	0	2
748	8	4	15	1	0	0	0	0	0	0	0	0	0	0	0	0	0	0	0	2	0	3.95984	11.9043	30.5586	4		1	0	0	0	0	2
749	8	4	15	0	1	0	0	0	0	0	0	0	0	0	0	0	0	2	0	0	0	3.9581	11.2395	30.4736	4		1	0	0	0	0	2
750	8	4	15	0	1	0	0	0	0	0	0	0	0	0	0	0	0	0	2	0	0	3.28538	12.3227	34.7163	4		1	0	0	0	0	2
751	8	4	15	0	1	0	0	0	0	0	0	0	0	0	0	0	0	0	0	2	0	3.12804	13.351	31.9782	4		1	0	0	0	0	2
752	8	4	15	0	0	1	0	0	0	0	0	0	0	0	0	0	0	2	0	0	0	4.011	11.2681	36.8994	4		1	0	0	0	0	2
753	8	4	15	0	0	1	0	0	0	0	0	0	0	0	0	0	0	0	2	0	0	3.4834	10.4147	33.1081	4		1	0	0	0	0	2
754	8	4	15	0	0	1	0	0	0	0	0	0	0	0	0	0	0	0	0	2	0	3.5958	14.3074	39.1987	4		1	0	0	0	0	2
755	5	3	10	1	0	0	0	0	0	0	0	0	0	0	0	0	0	1	0	0	0	2.70109	11.2757	38.7957	4		1	0	0	0	0	1
756	5	3	10	1	0	0	0	0	0	0	0	0	0	0	0	0	0	0	1	0	0	3.95146	14.6898	39.0839	4		1	0	0	0	0	1
757	5	3	10	1	0	0	0	0	0	0	0	0	0	0	0	0	0	0	0	1	0	2.68505	10.6213	36.585	4		1	0	0	0	0	1
758	5	3	10	0	1	0	0	0	0	0	0	0	0	0	0	0	0	1	0	0	0	2.83824	13.111	32.1521	4		1	0	0	0	0	1
759	5	3	10	0	1	0	0	0	0	0	0	0	0	0	0	0	0	0	1	0	0	3.80212	13.784	35.115	4		1	0	0	0	0	1
760	5	3	10	0	1	0	0	0	0	0	0	0	0	0	0	0	0	0	0	1	0	2.96079	12.5447	36.9024	4		1	0	0	0	0	1
761	5	3	10	0	0	1	0	0	0	0	0	0	0	0	0	0	0	1	0	0	0	2.88873	12.3597	35.1794	4		1	0	0	0	0	1
762	5	3	10	0	0	1	0	0	0	0	0	0	0	0	0	0	0	0	1	0	0	4.45512	12.2745	34.1532	4		1	0	0	0	0	1
763	5	3	10	0	0	1	0	0	0	0	0	0	0	0	0	0	0	0	0	1	0	4.16591	11.3207	32.5457	4		1	0	0	0	0	1
764	5	6	13	1	0	0	0	0	0	0	0	0	0	0	0	0	0	1	0	0	0	4.23686	12.6385	31.2341	4		1	0	0	0	0	1
765	5	6	13	1	0	0	0	0	0	0	0	0	0	0	0	0	0	0	1	0	0	4.42056	10.8513	32.1225	4		1	0	0	0	0	1
766	5	6	13	1	0	0	0	0	0	0	0	0	0	0	0	0	0	0	0	1	0	4.74924	11.0975	39.2953	4		1	0	0	0	0	1
767	5	6	13	0	1	0	0	0	0	0	0	0	0	0	0	0	0	1	0	0	0	3.15415	12.5184	36.0271	4		1	0	0	0	0	1
768	5	6	13	0	1	0	0	0	0	0	0	0	0	0	0	0	0	0	1	0	0	3.1122	11.6559	36.0085	4		1	0	0	0	0	1
769	5	6	13	0	1	0	0	0	0	0	0	0	0	0	0	0	0	0	0	1	0	3.68169	12.2341	36.6189	4		1	0	0	0	0	1
770	5	6	13	0	0	1	0	0	0	0	0	0	0	0	0	0	0	1	0	0	0	2.87517	12.7585	34.1402	4		1	0	0	0	0	1
771	5	6	13	0	0	1	0	0	0	0	0	0	0	0	0	0	0	0	1	0	0	4.36284	11.1764	33.3445	4		1	0	0	0	0	1
772	5	6	13	0	0	1	0	0	0	0	0	0	0	0	0	0	0	0	0	1	0	3.46663	11.5365	33.1231	4		1	0	0	0	0	1
773	8	4	14	0	0	0	0	0	0	0	0	0	0	0	0	1	0	0	0	0	0	3.77241	12.5031	35.9379	4		0	0	0	0	1	0
774	8	4	14	0	0	0	0	0	0	0	0	0	0	0	0	0	1	0	0	0	0	3.14513	12.5068	38.6553	4		0	0	0	0	1	0
775	10	8	21	0	0	0	0	0	0	0	0	0	0	0	0	2	0	0	0	0	0	3.10177	10.0191	36.0477	4		0	0	0	0	2	0
776	10	8	21	0	0	0	0	0	0	0	0	0	0	0	0	1	1	0	0	0	0	3.89678	14.5328	32.7228	4		0	0	0	0	2	0
777	10	8	21	0	0	0	0	0	0	0	0	0	0	0	0	0	2	0	0	0	0	3.73803	12.9456	32.845	4		0	0	0	0	2	0
778	5	7	14	0	0	0	0	0	0	0	0	0	1	0	0	1	0	0	0	0	0	3.44618	10.8086	39.0441	4		0	0	0	1	1	0
779	5	7	14	0	0	0	0	0	0	0	0	0	1	0	0	0	1	0	0	0	0	4.48582	14.8649	39.573	4		0	0	0	1	1	0
780	5	7	14	0	0	0	0	0	0	0	0	0	0	1	0	1	0	0	0	0	0	4.54719	12.5226	39.2033	4		0	0	0	1	1	0
781	5	7	14	0	0	0	0	0	0	0	0	0	0	1	0	0	1	0	0	0	0	3.75634	14.9422	31.0013	4		0	0	0	1	1	0
782	5	7	14	0	0	0	0	0	0	0	0	0	0	0	1	1	0	0	0	0	0	3.4412	12.8005	37.7011	4		0	0	0	1	1	0
783	5	7	14	0	0	0	0	0	0	0	0	0	0	0	1	0	1	0	0	0	0	4.78756	13.1498	36.4761	4		0	0	0	1	1	0
784	15	10	27	0	0	0	0	0	0	0	0	0	1	0	0	1	0	0	0	0	0	4.24955	13.0634	30.6718	4		0	0	0	1	1	0
785	15	10	27	0	0	0	0	0	0	0	0	0	1	0	0	0	1	0	0	0	0	3.53225	12.9959	32.9584	4		0	0	0	1	1	0
786	15	10	27	0	0	0	0	0	0	0	0	0	0	1	0	1	0	0	0	0	0	4.03711	12.1674	34.7919	4		0	0	0	1	1	0
787	15	10	27	0	0	0	0	0	0	0	0	0	0	1	0	0	1	0	0	0	0	3.51988	12.6333	31.8439	4		0	0	0	1	1	0
788	15	10	27	0	0	0	0	0	0	0	0	0	0	0	1	1	0	0	0	0	0	4.01439	13.593	34.6606	4		0	0	0	1	1	0
789	15	10	27	0	0	0	0	0	0	0	0	0	0	0	1	0	1	0	0	0	0	3.24871	12.3858	35.7461	4		0	0	0	1	1	0
790	8	4	14	0	0	0	0	0	0	1	0	0	0	0	0	1	0	0	0	0	0	4.45205	12.4081	35.8179	4		0	0	1	0	1	0
791	8	4	14	0	0	0	0	0	0	1	0	0	0	0	0	0	1	0	0	0	0	4.23155	13.4471	37.9888	4		0	0	1	0	1	0
792	8	4	14	0	0	0	0	0	0	0	1	0	0	0	0	1	0	0	0	0	0	3.95308	12.9837	33.668	4		0	0	1	0	1	0
793	8	4	14	0	0	0	0	0	0	0	1	0	0	0	0	0	1	0	0	0	0	4.37558	13.3603	32.6118	4		0	0	1	0	1	0
794	8	4	14	0	0	0	0	0	0	0	0	1	0	0	0	1	0	0	0	0	0	4.39723	14.0633	39.4875	4		0	0	1	0	1	0
795	8	4	14	0	0	0	0	0	0	0	0	1	0	0	0	0	1	0	0	0	0	3.56061	13.8272	37.6903	4		0	0	1	0	1	0
796	10	8	21	0	0	0	0	0	0	1	0	0	0	0	0	2	0	0	0	0	0	3.6072	13.5976	33.5979	4		0	0	1	0	2	0
797	10	8	21	0	0	0	0	0	0	1	0	0	0	0	0	1	1	0	0	0	0	3.20449	10.6421	39.4966	4		0	0	1	0	2	0
798	10	8	21	0	0	0	0	0	0	1	0	0	0	0	0	0	2	0	0	0	0	4.34761	12.8099	30.1729	4		0	0	1	0	2	0
799	10	8	21	0	0	0	0	0	0	0	1	0	0	0	0	2	0	0	0	0	0	3.55654	13.3733	34.0598	4		0	0	1	0	2	0
800	10	8	21	0	0	0	0	0	0	0	1	0	0	0	0	1	1	0	0	0	0	3.75753	12.6599	33.2541	4		0	0	1	0	2	0
801	10	8	21	0	0	0	0	0	0	0	1	0	0	0	0	0	2	0	0	0	0	3.548	11.966	34.9266	4		0	0	1	0	2	0
802	10	8	21	0	0	0	0	0	0	0	0	1	0	0	0	2	0	0	0	0	0	4.4898	14.9748	39.8611	4		0	0	1	0	2	0
803	10	8	21	0	0	0	0	0	0	0	0	1	0	0	0	1	1	0	0	0	0	4.68647	13.3066	35.5544	4		0	0	1	0	2	0
804	10	8	21	0	0	0	0	0	0	0	0	1	0	0	0	0	2	0	0	0	0	3.80212	13.6894	32.7713	4		0	0	1	0	2	0
805	12	6	24	0	0	0	0	0	0	1	0	0	0	0	0	1	0	0	0	0	0	3.42986	14.4004	36.5098	4		0	0	1	0	1	0
806	12	6	24	0	0	0	0	0	0	1	0	0	0	0	0	0	1	0	0	0	0	3.66366	13.8453	38.5863	4		0	0	1	0	1	0
807	12	6	24	0	0	0	0	0	0	0	1	0	0	0	0	1	0	0	0	0	0	3.17066	11.5942	37.7513	4		0	0	1	0	1	0
808	12	6	24	0	0	0	0	0	0	0	1	0	0	0	0	0	1	0	0	0	0	3.96763	11.4569	38.5834	4		0	0	1	0	1	0
809	12	6	24	0	0	0	0	0	0	0	0	1	0	0	0	1	0	0	0	0	0	4.03995	13.7673	36.7929	4		0	0	1	0	1	0
810	12	6	24	0	0	0	0	0	0	0	0	1	0	0	0	0	1	0	0	0	0	4.05008	14.7764	36.6272	4		0	0	1	0	1	0
811	12	6	24	0	0	0	0	0	0	1	0	0	0	0	0	2	0	0	0	0	0	3.45046	13.0372	38.7665	4		0	0	1	0	2	0
812	12	6	24	0	0	0	0	0	0	1	0	0	0	0	0	0	2	0	0	0	0	3.52953	11.1504	33.9022	4		0	0	1	0	2	0
813	12	6	24	0	0	0	0	0	0	0	1	0	0	0	0	2	0	0	0	0	0	3.6612	13.7655	33.2435	4		0	0	1	0	2	0
814	12	6	24	0	0	0	0	0	0	0	1	0	0	0	0	0	2	0	0	0	0	3.92738	14.2372	35.485	4		0	0	1	0	2	0
815	12	6	24	0	0	0	0	0	0	0	0	1	0	0	0	2	0	0	0	0	0	4.27461	11.3417	37.7493	4		0	0	1	0	2	0
816	12	6	24	0	0	0	0	0	0	0	0	1	0	0	0	0	2	0	0	0	0	2.74324	14.1474	35.1867	4		0	0	1	0	2	0
817	18	16	39	0	0	0	0	0	0	1	0	0	0	0	0	2	0	0	0	0	0	3.97036	14.0133	31.8422	4		0	0	1	0	2	0
818	18	16	39	0	0	0	0	0	0	1	0	0	0	0	0	0	2	0	0	0	0	3.48154	13.267	35.6603	4		0	0	1	0	2	0
819	18	16	39	0	0	0	0	0	0	0	1	0	0	0	0	2	0	0	0	0	0	3.99247	14.5777	34.4147	4		0	0	1	0	2	0
820	18	16	39	0	0	0	0	0	0	0	1	0	0	0	0	0	2	0	0	0	0	4.01512	11.5962	37.6261	4		0	0	1	0	2	0
821	18	16	39	0	0	0	0	0	0	0	0	1	0	0	0	2	0	0	0	0	0	3.19668	12.8424	33.0256	4		0	0	1	0	2	0
822	18	16	39	0	0	0	0	0	0	0	0	1	0	0	0	0	2	0	0	0	0	4.64148	11.216	36.102	4		0	0	1	0	2	0
823	20	8	30	0	0	0	0	0	0	1	0	0	0	0	0	1	0	0	0	0	0	3.54252	14.5505	32.0431	4		0	0	1	0	1	0
824	20	8	30	0	0	0	0	0	0	1	0	0	0	0	0	0	1	0	0	0	0	3.8647	12.4712	36.8602	4		0	0	1	0	1	0
825	20	8	30	0	0	0	0	0	0	0	1	0	0	0	0	1	0	0	0	0	0	3.26496	11.8777	36.8219	4		0	0	1	0	1	0
826	20	8	30	0	0	0	0	0	0	0	1	0	0	0	0	0	1	0	0	0	0	3.69712	13.3299	37.0803	4		0	0	1	0	1	0
827	20	8	30	0	0	0	0	0	0	0	0	1	0	0	0	1	0	0	0	0	0	4.18654	14.7498	37.6295	4		0	0	1	0	1	0
828	20	8	30	0	0	0	0	0	0	0	0	1	0	0	0	0	1	0	0	0	0	3.20433	11.6458	35.4045	4		0	0	1	0	1	0
829	12	5	19	1	0	0	0	0	0	0	0	0	0	0	0	1	0	0	0	0	0	3.91346	14.2173	30.8719	4		1	0	0	0	1	0
830	12	5	19	1	0	0	0	0	0	0	0	0	0	0	0	0	1	0	0	0	0	4.04776	14.0027	36.1063	4		1	0	0	0	1	0
831	12	5	19	0	1	0	0	0	0	0	0	0	0	0	0	1	0	0	0	0	0	4.8261	10.7743	34.2556	4		1	0	0	0	1	0
832	12	5	19	0	1	0	0	0	0	0	0	0	0	0	0	0	1	0	0	0	0	4.5445	12.7026	32.5303	4		1	0	0	0	1	0
833	12	5	19	0	0	1	0	0	0	0	0	0	0	0	0	1	0	0	0	0	0	4.28723	12.7917	37.3699	4		1	0	0	0	1	0
834	12	5	19	0	0	1	0	0	0	0	0	0	0	0	0	0	1	0	0	0	0	3.21996	13.0995	32.5836	4		1	0	0	0	1	0
835	10	4	17	1	0	0	0	0	0	0	0	0	0	0	0	2	0	0	0	0	0	3.02827	12.6224	32.914	4		1	0	0	0	2	0
836	10	4	17	1	0	0	0	0	0	0	0	0	0	0	0	0	2	0	0	0	0	3.89611	14.4412	31.7489	4		1	0	0	0	2	0
837	10	4	17	0	1	0	0	0	0	0	0	0	0	0	0	2	0	0	0	0	0	3.29186	13.169	34.6754	4		1	0	0	0	2	0
838	10	4	17	0	1	0	0	0	0	0	0	0	0	0	0	0	2	0	0	0	0	4.01319	14.8791	35.6689	4		1	0	0	0	2	0
839	10	4	17	0	0	1	0	0	0	0	0	0	0	0	0	2	0	0	0	0	0	4.2223	11.8352	38.9903	4		1	0	0	0	2	0
840	10	4	17	0	0	1	0	0	0	0	0	0	0	0	0	0	2	0	0	0	0	4.60502	10.9786	31.6679	4		1	0	0	0	2	0
841	12	6	21	1	0	0	0	0	0	0	0	0	0	0	0	2	0	0	0	0	0	3.16912	10.2646	39.575	4		1	0	0	0	2	0
842	12	6	21	1	0	0	0	0	0	0	0	0	0	0	0	0	2	0	0	0	0	3.66291	12.1253	31.8923	4		1	0	0	0	2	0
843	12	6	21	0	1	0	0	0	0	0	0	0	0	0	0	2	0	0	0	0	0	3.73956	11.95	37.6036	4		1	0	0	0	2	0
844	12	6	21	0	1	0	0	0	0	0	0	0	0	0	0	0	2	0	0	0	0	3.68192	13.6385	32.8187	4		1	0	0	0	2	0
845	12	6	21	0	0	1	0	0	0	0	0	0	0	0	0	2	0	0	0	0	0	3.63659	12.5368	32.9812	4		1	0	0	0	2	0
846	12	6	21	0	0	1	0	0	0	0	0	0	0	0	0	0	2	0	0	0	0	3.2221	12.0505	30.9838	4		1	0	0	0	2	0
847	12	5	20	1	0	0	0	0	0	0	0	0	0	0	0	2	0	0	0	0	0	4.12643	14.2075	36.6864	4		1	0	0	0	2	0
848	12	5	20	1	0	0	0	0	0	0	0	0	0	0	0	0	2	0	0	0	0	4.34149	14.73	31.8909	4		1	0	0	0	2	0
849	12	5	20	0	1	0	0	0	0	0	0	0	0	0	0	2	0	0	0	0	0	4.24317	12.8191	36.5173	4		1	0	0	0	2	0
850	12	5	20	0	1	0	0	0	0	0	0	0	0	0	0	0	2	0	0	0	0	4.28012	10.4842	31.4963	4		1	0	0	0	2	0
851	12	5	20	0	0	1	0	0	0	0	0	0	0	0	0	2	0	0	0	0	0	4.36085	13.3017	36.1988	4		1	0	0	0	2	0
852	12	5	20	0	0	1	0	0	0	0	0	0	0	0	0	0	2	0	0	0	0	3.46325	10.7237	38.1254	4		1	0	0	0	2	0
853	7	4	14	1	0	0	0	0	0	0	0	0	0	0	0	1	0	0	0	0	0	3.7509	11.7594	35.9232	4		1	0	0	0	1	0
854	7	4	14	1	0	0	0	0	0	0	0	0	0	0	0	0	1	0	0	0	0	2.76454	11.1086	37.1635	4		1	0	0	0	1	0
855	7	4	14	0	1	0	0	0	0	0	0	0	0	0	0	1	0	0	0	0	0	2.9325	12.6814	38.1144	4		1	0	0	0	1	0
856	7	4	14	0	1	0	0	0	0	0	0	0	0	0	0	0	1	0	0	0	0	4.04665	12.6669	38.752	4		1	0	0	0	1	0
857	7	4	14	0	0	1	0	0	0	0	0	0	0	0	0	1	0	0	0	0	0	3.96389	11.4149	32.098	4		1	0	0	0	1	0
858	7	4	14	0	0	1	0	0	0	0	0	0	0	0	0	0	1	0	0	0	0	3.15453	12.5982	37.2329	4		1	0	0	0	1	0
859	9	3	13	0	0	0	0	0	0	0	0	0	1	0	0	0	0	0	0	0	0	3.47592	13.7836	30.7726	4		0	0	0	1	0	0
860	9	3	13	0	0	0	0	0	0	0	0	0	0	1	0	0	0	0	0	0	0	3.53497	11.2174	36.0368	4		0	0	0	1	0	0
861	9	3	13	0	0	0	0	0	0	0	0	0	0	0	1	0	0	0	0	0	0	4.86727	12.7015	32.1783	4		0	0	0	1	0	0
862	5	1	7	0	0	0	0	0	0	0	0	0	1	0	0	0	0	0	0	0	0	2.72404	14.6797	32.2151	4		0	0	0	1	0	0
863	5	1	7	0	0	0	0	0	0	0	0	0	0	1	0	0	0	0	0	0	0	3.47944	14.7005	35.7464	4		0	0	0	1	0	0
864	5	1	7	0	0	0	0	0	0	0	0	0	0	0	1	0	0	0	0	0	0	4.10029	12.2901	33.0248	4		0	0	0	1	0	0
865	12	4	18	0	0	0	0	0	0	0	0	0	2	0	0	0	0	0	0	0	0	3.50601	11.0412	39.5282	4		0	0	0	2	0	0
866	12	4	18	0	0	0	0	0	0	0	0	0	1	1	0	0	0	0	0	0	0	3.51468	13.4014	39.1198	4		0	0	0	2	0	0
867	12	4	18	0	0	0	0	0	0	0	0	0	1	0	1	0	0	0	0	0	0	3.49386	11.7598	37.4713	4		0	0	0	2	0	0
868	12	4	18	0	0	0	0	0	0	0	0	0	0	2	0	0	0	0	0	0	0	4.30865	11.5499	36.4411	4		0	0	0	2	0	0
869	12	4	18	0	0	0	0	0	0	0	0	0	0	1	1	0	0	0	0	0	0	3.44209	12.7608	33.2927	4		0	0	0	2	0	0
870	12	4	18	0	0	0	0	0	0	0	0	0	0	0	2	0	0	0	0	0	0	3.37118	14.7789	37.0169	4		0	0	0	2	0	0
871	13	6	20	0	0	0	0	0	0	0	0	0	1	0	0	0	0	0	0	0	0	3.44181	14.1566	31.5072	4		0	0	0	1	0	0
872	13	6	20	0	0	0	0	0	0	0	0	0	0	1	0	0	0	0	0	0	0	3.51213	11.9753	35.748	4		0	0	0	1	0	0
873	13	6	20	0	0	0	0	0	0	0	0	0	0	0	1	0	0	0	0	0	0	3.93954	14.7048	34.1953	4		0	0	0	1	0	0
874	13	9	23	0	0	0	0	0	0	0	0	0	1	0	0	0	0	0	0	0	0	3.09441	12.0661	33.1346	4		0	0	0	1	0	0
875	13	9	23	0	0	0	0	0	0	0	0	0	0	1	0	0	0	0	0	0	0	4.48565	13.7004	31.8653	4		0	0	0	1	0	0
876	13	9	23	0	0	0	0	0	0	0	0	0	0	0	1	0	0	0	0	0	0	4.09671	11.9615	36.981	4		0	0	0	1	0	0
877	21	9	31	0	0	0	0	0	0	0	0	0	1	0	0	0	0	0	0	0	0	3.29069	12.9687	35.3305	4		0	0	0	1	0	0
878	21	9	31	0	0	0	0	0	0	0	0	0	0	1	0	0	0	0	0	0	0	4.26317	14.2539	35.1408	4		0	0	0	1	0	0
879	21	9	31	0	0	0	0	0	0	0	0	0	0	0	1	0	0	0	0	0	0	4.48058	12.0296	33.9444	4		0	0	0	1	0	0
880	5	5	11	0	0	0	0	0	0	0	0	0	1	0	0	0	0	0	0	0	0	3.0871	12.9058	31.5139	4		0	0	0	1	0	0
881	5	5	11	0	0	0	0	0	0	0	0	0	0	1	0	0	0	0	0	0	0	3.9906	11.5869	35.4487	4		0	0	0	1	0	0
882	5	5	11	0	0	0	0	0	0	0	0	0	0	0	1	0	0	0	0	0	0	3.74946	11.8045	32.8929	4		0	0	0	1	0	0
883	13	6	20	0	0	0	0	0	0	0	0	0	1	0	0	0	0	0	0	0	0	4.41866	14.932	39.2419	4		0	0	0	1	0	0
884	13	6	20	0	0	0	0	0	0	0	0	0	0	1	0	0	0	0	0	0	0	4.04828	11.9932	34.7892	4		0	0	0	1	0	0
885	13	6	20	0	0	0	0	0	0	0	0	0	0	0	1	0	0	0	0	0	0	2.84574	10.4986	36.4855	4		0	0	0	1	0	0
886	11	6	18	0	0	0	0	0	0	0	0	0	1	0	0	0	0	0	0	0	0	3.27109	11.8054	38.5034	4		0	0	0	1	0	0
887	11	6	18	0	0	0	0	0	0	0	0	0	0	1	0	0	0	0	0	0	0	4.33866	11.3484	30.0078	4		0	0	0	1	0	0
888	11	6	18	0	0	0	0	0	0	0	0	0	0	0	1	0	0	0	0	0	0	3.8462	11.5144	37.2942	4		0	0	0	1	0	0
889	9	6	16	0	0	0	0	0	0	0	0	0	1	0	0	0	0	0	0	0	0	3.43948	13.6087	32.2057	4		0	0	0	1	0	0
890	9	6	16	0	0	0	0	0	0	0	0	0	0	1	0	0	0	0	0	0	0	3.56606	14.0084	37.3257	4		0	0	0	1	0	0
891	9	6	16	0	0	0	0	0	0	0	0	0	0	0	1	0	0	0	0	0	0	4.19789	12.9532	35.4588	4		0	0	0	1	0	0
892	17	15	33	0	0	0	0	0	0	0	0	0	1	0	0	0	0	0	0	0	0	3.88933	10.5187	37.8646	4		0	0	0	1	0	0
893	17	15	33	0	0	0	0	0	0	0	0	0	0	1	0	0	0	0	0	0	0	4.07509	12.6356	37.9206	4		0	0	0	1	0	0
894	17	15	33	0	0	0	0	0	0	0	0	0	0	0	1	0	0	0	0	0	0	3.64727	11.5983	34.4078	4		0	0	0	1	0	0
895	12	13	27	0	0	0	0	0	0	0	0	0	1	0	0	0	0	0	0	0	0	3.81781	11.3659	32.0181	4		0	0	0	1	0	0
896	12	13	27	0	0	0	0	0	0	0	0	0	0	1	0	0	0	0	0	0	0	3.09315	11.2434	35.2078	4		0	0	0	1	0	0
897	12	13	27	0	0	0	0	0	0	0	0	0	0	0	1	0	0	0	0	0	0	3.2959	14.553	36.1297	4		0	0	0	1	0	0
898	9	8	20	0	0	0	0	0	0	0	0	0	1	0	0	0	0	0	0	0	0	3.78998	13.37	37.3908	4		0	0	0	1	0	0
899	9	8	20	0	0	0	0	0	0	0	0	0	0	1	0	0	0	0	0	0	0	3.39231	10.953	34.4555	4		0	0	0	1	0	0
900	9	8	20	0	0	0	0	0	0	0	0	0	0	0	1	0	0	0	0	0	0	3.91464	11.2786	34.9794	4		0	0	0	1	0	0
901	9	4	14	0	0	0	0	0	0	0	0	0	1	0	0	0	0	0	0	0	0	4.33288	11.4262	34.9977	4		0	0	0	1	0	0
902	9	4	14	0	0	0	0	0	0	0	0	0	0	1	0	0	0	0	0	0	0	3.74455	14.129	32.4099	4		0	0	0	1	0	0
903	9	4	14	0	0	0	0	0	0	0	0	0	0	0	1	0	0	0	0	0	0	2.90522	14.6321	30.426	4		0	0	0	1	0	0
904	11	7	19	0	0	0	0	0	0	0	0	0	1	0	0	0	0	0	0	0	0	4.35599	11.6419	37.9802	4		0	0	0	1	0	0
905	11	7	19	0	0	0	0	0	0	0	0	0	0	1	0	0	0	0	0	0	0	3.95606	12.9162	33.6592	4		0	0	0	1	0	0
906	11	7	19	0	0	0	0	0	0	0	0	0	0	0	1	0	0	0	0	0	0	3.39629	13.2167	30.7011	4		0	0	0	1	0	0
907	16	10	28	0	0	0	0	0	0	0	0	0	2	0	0	0	0	0	0	0	0	3.88402	12.5744	34.461	4		0	0	0	2	0	0
908	16	10	28	0	0	0	0	0	0	0	0	0	0	2	0	0	0	0	0	0	0	4.02991	13.9785	35.6467	4		0	0	0	2	0	0
909	16	10	28	0	0	0	0	0	0	0	0	0	0	0	2	0	0	0	0	0	0	3.66694	14.6744	31.4853	4		0	0	0	2	0	0
910	16	10	28	0	0	0	0	0	0	0	0	0	2	0	0	0	0	0	0	0	0	3.73106	12.5962	31.3667	4		0	0	0	2	0	0
911	16	10	28	0	0	0	0	0	0	0	0	0	0	2	0	0	0	0	0	0	0	4.23374	14.7929	34.757	4		0	0	0	2	0	0
912	16	10	28	0	0	0	0	0	0	0	0	0	0	0	2	0	0	0	0	0	0	4.13186	12.6327	37.5404	4		0	0	0	2	0	0
913	16	10	28	0	0	0	0	0	0	0	0	0	2	0	0	0	0	0	0	0	0	2.81012	12.0097	36.8157	4		0	0	0	2	0	0
914	16	10	28	0	0	0	0	0	0	0	0	0	0	2	0	0	0	0	0	0	0	3.83953	13.0488	34.3812	4		0	0	0	2	0	0
915	16	10	28	0	0	0	0	0	0	0	0	0	0	0	2	0	0	0	0	0	0	4.12553	12.358	33.5835	4		0	0	0	2	0	0
916	18	11	31	0	0	0	0	0	0	0	0	0	2	0	0	0	0	0	0	0	0	2.84668	12.2644	36.9485	4		0	0	0	2	0	0
917	18	11	31	0	0	0	0	0	0	0	0	0	0	2	0	0	0	0	0	0	0	3.29425	11.1135	33.2989	4		0	0	0	2	0	0
918	18	11	31	0	0	0	0	0	0	0	0	0	0	0	2	0	0	0	0	0	0	2.94115	13.0957	32.8605	4		0	0	0	2	0	0
919	15	5	21	0	0	0	0	0	0	0	0	0	1	0	0	0	0	0	0	0	0	3.33585	13.7611	38.306	4		0	0	0	1	0	0
920	15	5	21	0	0	0	0	0	0	0	0	0	0	1	0	0	0	0	0	0	0	3.83115	13.3059	34.9134	4		0	0	0	1	0	0
921	15	5	21	0	0	0	0	0	0	0	0	0	0	0	1	0	0	0	0	0	0	4.07048	13.5575	35.6218	4		0	0	0	1	0	0
922	15	9	25	0	0	0	0	0	0	0	0	0	1	0	0	0	0	0	0	0	0	4.36727	11.3926	39.8407	4		0	0	0	1	0	0
923	15	9	25	0	0	0	0	0	0	0	0	0	0	1	0	0	0	0	0	0	0	4.35849	14.9369	35.9591	4		0	0	0	1	0	0
924	15	9	25	0	0	0	0	0	0	0	0	0	0	0	1	0	0	0	0	0	0	4.44657	13.1489	30.4845	4		0	0	0	1	0	0
925	9	3	14	0	0	0	0	0	0	0	0	0	1	0	0	0	0	0	0	0	0	3.3499	13.4653	35.2401	4		0	0	0	1	0	0
926	9	3	14	0	0	0	0	0	0	0	0	0	0	1	0	0	0	0	0	0	0	3.09596	14.0866	37.8818	4		0	0	0	1	0	0
927	9	3	14	0	0	0	0	0	0	0	0	0	0	0	1	0	0	0	0	0	0	4.65858	14.1593	31.2551	4		0	0	0	1	0	0
928	7	2	12	0	0	0	0	0	0	0	0	0	1	0	0	0	0	0	0	0	0	3.77623	13.5838	39.3515	4		0	0	0	1	0	0
929	7	2	12	0	0	0	0	0	0	0	0	0	0	1	0	0	0	0	0	0	0	4.51475	14.637	33.5174	4		0	0	0	1	0	0
930	7	2	12	0	0	0	0	0	0	0	0	0	0	0	1	0	0	0	0	0	0	4.3142	11.8309	38.6122	4		0	0	0	1	0	0
931	5	1	10	0	0	0	0	0	0	0	0	0	1	0	0	0	0	0	0	0	0	3.74979	14.0499	36.586	4		0	0	0	1	0	0
932	5	1	10	0	0	0	0	0	0	0	0	0	0	1	0	0	0	0	0	0	0	4.32721	13.8647	37.111	4		0	0	0	1	0	0
933	5	1	10	0	0	0	0	0	0	0	0	0	0	0	1	0	0	0	0	0	0	4.85991	10.2036	38.3362	4		0	0	0	1	0	0
934	15	10	27	0	0	0	0	0	0	0	0	0	1	0	0	0	0	0	0	0	0	3.43616	12.274	32.6879	4		0	0	0	1	0	0
935	15	10	27	0	0	0	0	0	0	0	0	0	0	1	0	0	0	0	0	0	0	3.09365	11.6058	32.4179	4		0	0	0	1	0	0
936	15	10	27	0	0	0	0	0	0	0	0	0	0	0	1	0	0	0	0	0	0	3.41573	13.0545	38.9693	4		0	0	0	1	0	0
937	7	6	17	0	0	0	0	0	0	0	0	0	1	0	0	0	0	0	0	0	0	3.8591	14.7988	35.769	4		0	0	0	1	0	0
938	7	6	17	0	0	0	0	0	0	0	0	0	0	1	0	0	0	0	0	0	0	2.94815	10.8234	30.5382	4		0	0	0	1	0	0
939	7	6	17	0	0	0	0	0	0	0	0	0	0	0	1	0	0	0	0	0	0	4.0536	12.9038	33.2174	4		0	0	0	1	0	0
940	9	7	19	0	0	0	0	0	0	0	0	0	1	0	0	0	0	0	0	0	0	4.61745	13.0556	31.0341	4		0	0	0	1	0	0
941	9	7	19	0	0	0	0	0	0	0	0	0	0	1	0	0	0	0	0	0	0	3.52067	11.3299	39.2544	4		0	0	0	1	0	0
942	9	7	19	0	0	0	0	0	0	0	0	0	0	0	1	0	0	0	0	0	0	2.63013	11.0423	38.1834	4		0	0	0	1	0	0
943	11	5	18	0	0	0	0	0	0	0	0	0	1	0	0	0	0	0	0	0	0	3.14014	12.8415	38.0658	4		0	0	0	1	0	0
944	11	5	18	0	0	0	0	0	0	0	0	0	0	1	0	0	0	0	0	0	0	3.61259	12.4577	38.1632	4		0	0	0	1	0	0
945	11	5	18	0	0	0	0	0	0	0	0	0	0	0	1	0	0	0	0	0	0	4.31802	11.3279	38.2411	4		0	0	0	1	0	0
946	11	4	18	0	0	0	0	0	0	0	0	0	1	0	0	0	0	0	0	0	0	3.02512	13.2137	36.444	4		0	0	0	1	0	0
947	11	4	18	0	0	0	0	0	0	0	0	0	0	1	0	0	0	0	0	0	0	4.36206	11.6672	37.5272	4		0	0	0	1	0	0
948	11	4	18	0	0	0	0	0	0	0	0	0	0	0	1	0	0	0	0	0	0	3.68096	12.4386	32.4844	4		0	0	0	1	0	0
949	15	10	28	0	0	0	0	0	0	0	0	0	3	0	0	0	0	0	0	0	0	3.86128	12.4605	37.8436	4		0	0	0	3	0	0
950	15	10	28	0	0	0	0	0	0	0	0	0	0	3	0	0	0	0	0	0	0	2.92593	13.171	34.906	4		0	0	0	3	0	0
951	15	10	28	0	0	0	0	0	0	0	0	0	0	0	3	0	0	0	0	0	0	4.15907	13.9718	34.9648	4		0	0	0	3	0	0
952	25	10	40	0	0	0	0	0	0	0	0	0	5	0	0	0	0	0	0	0	0	3.35196	14.8007	33.299	4		0	0	0	5	0	0
953	25	10	40	0	0	0	0	0	0	0	0	0	0	5	0	0	0	0	0	0	0	3.52273	12.7229	34.7082	4		0	0	0	5	0	0
954	25	10	40	0	0	0	0	0	0	0	0	0	0	0	5	0	0	0	0	0	0	3.50467	12.6617	31.9307	4		0	0	0	5	0	0
955	5	7	14	0	0	0	0	0	0	0	0	0	1	0	0	0	0	0	0	0	0	4.46009	14.6248	36.7227	4		0	0	0	1	0	0
956	5	7	14	0	0	0	0	0	0	0	0	0	1	0	0	0	0	0	0	0	0	3.84934	13.4442	36.2046	4		0	0	0	1	0	0
957	5	7	14	0	0	0	0	0	0	0	0	0	0	1	0	0	0	0	0	0	0	3.8711	11.3461	31.4153	4		0	0	0	1	0	0
958	5	7	14	0	0	0	0	0	0	0	0	0	0	1	0	0	0	0	0	0	0	2.98719	11.2659	31.8351	4		0	0	0	1	0	0
959	5	7	14	0	0	0	0	0	0	0	0	0	0	0	1	0	0	0	0	0	0	3.98874	11.994	37.2747	4		0	0	0	1	0	0
960	5	7	14	0	0	0	0	0	0	0	0	0	0	0	1	0	0	0	0	0	0	4.49636	14.2642	31.6074	4		0	0	0	1	0	0
961	15	8	25	0	0	0	0	0	0	0	0	0	1	0	0	0	0	0	0	0	0	3.15269	12.5128	36.8692	4		0	0	0	1	0	0
962	15	8	25	0	0	0	0	0	0	0	0	0	0	1	0	0	0	0	0	0	0	3.35919	12.7919	34.4251	4		0	0	0	1	0	0
963	15	8	25	0	0	0	0	0	0	0	0	0	0	0	1	0	0	0	0	0	0	4.47924	12.9137	35.0819	4		0	0	0	1	0	0
964	18	8	28	0	0	0	0	0	0	0	0	0	1	0	0	0	0	0	0	0	0	4.52878	12.922	33.7367	4		0	0	0	1	0	0
965	18	8	28	0	0	0	0	0	0	0	0	0	0	1	0	0	0	0	0	0	0	4.04549	12.2929	35.2151	4		0	0	0	1	0	0
966	18	8	28	0	0	0	0	0	0	0	0	0	0	0	1	0	0	0	0	0	0	3.72043	10.7731	32.2929	4		0	0	0	1	0	0
967	11	9	21	0	0	0	0	0	0	0	0	0	1	0	0	0	0	0	0	0	0	3.70999	13.9759	36.3279	4		0	0	0	1	0	0
968	11	9	21	0	0	0	0	0	0	0	0	0	0	1	0	0	0	0	0	0	0	2.95139	11.7398	31.6234	4		0	0	0	1	0	0
969	11	9	21	0	0	0	0	0	0	0	0	0	0	0	1	0	0	0	0	0	0	3.87787	10.7032	31.9057	4		0	0	0	1	0	0
970	11	8	20	0	0	0	0	0	0	0	0	0	1	0	0	0	0	0	0	0	0	3.43775	11.8232	30.4019	4		0	0	0	1	0	0
971	11	8	20	0	0	0	0	0	0	0	0	0	0	1	0	0	0	0	0	0	0	4.3857	12.7856	32.7111	4		0	0	0	1	0	0
972	11	8	20	0	0	0	0	0	0	0	0	0	0	0	1	0	0	0	0	0	0	4.0979	13.9175	33.0385	4		0	0	0	1	0	0
973	11	4	16	0	0	0	0	0	0	0	0	0	1	0	0	0	0	0	0	0	0	3.12143	11.6218	37.6445	4		0	0	0	1	0	0
974	11	4	16	0	0	0	0	0	0	0	0	0	0	1	0	0	0	0	0	0	0	3.04873	12.331	34.1023	4		0	0	0	1	0	0
975	11	4	16	0	0	0	0	0	0	0	0	0	0	0	1	0	0	0	0	0	0	4.65314	12.7841	31.7456	4		0	0	0	1	0	0
976	17	8	26	0	0	0	0	0	0	0	0	0	1	0	0	0	0	0	0	0	0	3.018	12.2495	34.5452	4		0	0	0	1	0	0
977	17	8	26	0	0	0	0	0	0	0	0	0	0	1	0	0	0	0	0	0	0	4.2271	13.346	38.6252	4		0	0	0	1	0	0
978	17	8	26	0	0	0	0	0	0	0	0	0	0	0	1	0	0	0	0	0	0	4.27079	12.1554	33.2221	4		0	0	0	1	0	0
979	15	9	26	0	0	0	0	0	0	0	0	0	1	0	0	0	0	0	0	0	0	2.97667	13.3671	37.8076	4		0	0	0	1	0	0
980	15	9	26	0	0	0	0	0	0	0	0	0	0	1	0	0	0	0	0	0	0	3.77061	13.0397	39.1905	4		0	0	0	1	0	0
981	15	9	26	0	0	0	0	0	0	0	0	0	0	0	1	0	0	0	0	0	0	4.61983	11.6951	35.5431	4		0	0	0	1	0	0
982	13	9	23	0	0	0	0	0	0	0	0	0	1	0	0	0	0	0	0	0	0	3.65012	13.0723	37.1926	4		0	0	0	1	0	0
983	13	9	23	0	0	0	0	0	0	0	0	0	0	1	0	0	0	0	0	0	0	3.92978	13.9132	30.4206	4		0	0	0	1	0	0
984	13	9	23	0	0	0	0	0	0	0	0	0	0	0	1	0	0	0	0	0	0	3.74979	14.0629	37.4806	4		0	0	0	1	0	0
985	15	10	27	0	0	0	0	0	0	0	0	0	1	0	0	0	0	0	0	0	0	3.78894	10.428	35.6112	4		0	0	0	1	0	0
986	15	10	27	0	0	0	0	0	0	0	0	0	1	0	0	0	0	0	0	0	0	4.27676	11.2053	32.1431	4		0	0	0	1	0	0
987	15	10	27	0	0	0	0	0	0	0	0	0	0	1	0	0	0	0	0	0	0	4.12067	13.927	37.1507	4		0	0	0	1	0	0
988	15	10	27	0	0	0	0	0	0	0	0	0	0	1	0	0	0	0	0	0	0	3.19089	13.6415	35.476	4		0	0	0	1	0	0
989	15	10	27	0	0	0	0	0	0	0	0	0	0	0	1	0	0	0	0	0	0	3.8227	14.7147	34.453	4		0	0	0	1	0	0
990	15	10	27	0	0	0	0	0	0	0	0	0	0	0	1	0	0	0	0	0	0	3.77037	14.8985	33.2705	4		0	0	0	1	0	0
991	18	6	27	0	0	0	0	0	0	0	0	0	1	0	0	0	0	0	0	0	0	4.521	13.4884	33.4698	4		0	0	0	1	0	0
992	18	6	27	0	0	0	0	0	0	0	0	0	0	1	0	0	0	0	0	0	0	3.80638	13.4143	33.2589	4		0	0	0	1	0	0
993	18	6	27	0	0	0	0	0	0	0	0	0	0	0	1	0	0	0	0	0	0	4.32322	12.5462	38.4424	4		0	0	0	1	0	0
994	19	6	28	0	0	0	0	0	0	0	0	0	1	0	0	0	0	0	0	0	0	3.16453	14.4645	37.9117	4		0	0	0	1	0	0
995	19	6	28	0	0	0	0	0	0	0	0	0	0	1	0	0	0	0	0	0	0	3.80981	11.7151	36.1198	4		0	0	0	1	0	0
996	19	6	28	0	0	0	0	0	0	0	0	0	0	0	1	0	0	0	0	0	0	4.11867	10.7819	30.928	4		0	0	0	1	0	0
997	14	6	22	0	0	0	0	0	0	0	0	0	1	0	0	0	0	0	0	0	0	4.15917	13.6869	31.5439	4		0	0	0	1	0	0
998	14	6	22	0	0	0	0	0	0	0	0	0	0	1	0	0	0	0	0	0	0	4.452	13.5216	30.6311	4		0	0	0	1	0	0
999	14	6	22	0	0	0	0	0	0	0	0	0	0	0	1	0	0	0	0	0	0	3.47733	12.9648	30.4372	4		0	0	0	1	0	0
1000	14	5	21	0	0	0	0	0	0	0	0	0	1	0	0	0	0	0	0	0	0	4.98087	11.7146	38.1549	4		0	0	0	1	0	0
1001	14	5	21	0	0	0	0	0	0	0	0	0	0	1	0	0	0	0	0	0	0	3.50905	10.721	38.1085	4		0	0	0	1	0	0
1002	14	5	21	0	0	0	0	0	0	0	0	0	0	0	1	0	0	0	0	0	0	3.28715	14.3962	31.4769	4		0	0	0	1	0	0
1003	9	5	17	0	0	0	0	0	0	0	0	0	3	0	0	0	0	0	0	0	0	3.45877	14.8624	34.3476	4		0	0	0	3	0	0
1004	9	5	17	0	0	0	0	0	0	0	0	0	0	3	0	0	0	0	0	0	0	3.67507	13.3859	34.1671	4		0	0	0	3	0	0
1005	9	5	17	0	0	0	0	0	0	0	0	0	0	0	3	0	0	0	0	0	0	4.87919	14.3928	38.2468	4		0	0	0	3	0	0
1006	15	8	29	0	0	0	0	0	0	0	0	0	3	0	0	0	0	0	0	0	0	3.11914	13.2474	34.9131	4		0	0	0	3	0	0
1007	15	8	29	0	0	0	0	0	0	0	0	0	0	3	0	0	0	0	0	0	0	4.03608	11.6112	38.8617	4		0	0	0	3	0	0
1008	15	8	29	0	0	0	0	0	0	0	0	0	0	0	3	0	0	0	0	0	0	4.06296	12.2686	35.1721	4		0	0	0	3	0	0
1009	6	3	16	0	0	0	0	0	0	0	0	0	4	0	0	0	0	0	0	0	0	4.75089	11.6122	38.3465	4		0	0	0	4	0	0
1010	6	3	16	0	0	0	0	0	0	0	0	0	0	4	0	0	0	0	0	0	0	3.76158	11.4855	32.3992	4		0	0	0	4	0	0
1011	6	3	16	0	0	0	0	0	0	0	0	0	0	0	4	0	0	0	0	0	0	4.05431	12.2722	34.6732	4		0	0	0	4	0	0
1012	14	6	22	0	0	0	0	0	0	0	0	0	2	0	0	0	0	0	0	0	0	3.17571	12.2132	33.0511	4		0	0	0	2	0	0
1013	14	6	22	0	0	0	0	0	0	0	0	0	0	2	0	0	0	0	0	0	0	3.24632	10.5884	34.6166	4		0	0	0	2	0	0
1014	14	6	22	0	0	0	0	0	0	0	0	0	0	0	2	0	0	0	0	0	0	2.97381	14.1744	34.9971	4		0	0	0	2	0	0
1015	10	9	21	0	0	0	0	0	0	0	0	0	2	0	0	0	0	0	0	0	0	3.54487	13.4697	31.6859	4		0	0	0	2	0	0
1016	10	9	21	0	0	0	0	0	0	0	0	0	0	2	0	0	0	0	0	0	0	3.98735	14.5427	36.1423	4		0	0	0	2	0	0
1017	10	9	21	0	0	0	0	0	0	0	0	0	0	0	2	0	0	0	0	0	0	2.9964	13.9141	30.0832	4		0	0	0	2	0	0
1018	17	6	25	0	0	0	0	0	0	1	0	0	1	0	0	0	0	0	0	0	0	3.51649	13.5188	35.9403	4		0	0	1	1	0	0
1019	17	6	25	0	0	0	0	0	0	0	1	0	1	0	0	0	0	0	0	0	0	3.16672	14.5085	38.7599	4		0	0	1	1	0	0
1020	17	6	25	0	0	0	0	0	0	0	0	1	1	0	0	0	0	0	0	0	0	3.22691	13.7179	37.707	4		0	0	1	1	0	0
1021	19	7	28	0	0	0	0	0	0	1	0	0	1	0	0	0	0	0	0	0	0	4.32633	12.1143	36.6485	4		0	0	1	1	0	0
1022	19	7	28	0	0	0	0	0	0	0	1	0	1	0	0	0	0	0	0	0	0	3.47184	13.092	36.1083	4		0	0	1	1	0	0
1023	19	7	28	0	0	0	0	0	0	0	0	1	1	0	0	0	0	0	0	0	0	2.98925	11.4654	33.0446	4		0	0	1	1	0	0
1024	21	8	31	0	0	0	0	0	0	1	0	0	1	0	0	0	0	0	0	0	0	3.17879	12.9695	35.3881	4		0	0	1	1	0	0
1025	21	8	31	0	0	0	0	0	0	0	1	0	1	0	0	0	0	0	0	0	0	3.95987	13.2071	35.5697	4		0	0	1	1	0	0
1026	21	8	31	0	0	0	0	0	0	0	0	1	1	0	0	0	0	0	0	0	0	4.28467	12.6337	32.6556	4		0	0	1	1	0	0
1027	11	4	17	0	0	0	0	0	0	1	0	0	1	0	0	0	0	0	0	0	0	3.17435	12.5406	39.0323	4		0	0	1	1	0	0
1028	11	4	17	0	0	0	0	0	0	0	1	0	1	0	0	0	0	0	0	0	0	3.8799	11.2376	35.4467	4		0	0	1	1	0	0
1029	11	4	17	0	0	0	0	0	0	0	0	1	1	0	0	0	0	0	0	0	0	3.72955	13.8688	38.2557	4		0	0	1	1	0	0
1030	15	6	23	0	0	0	0	0	0	1	0	0	1	0	0	0	0	0	0	0	0	4.15133	12.537	37.5183	4		0	0	1	1	0	0
1031	15	6	23	0	0	0	0	0	0	0	1	0	1	0	0	0	0	0	0	0	0	3.46131	11.5143	32.1166	4		0	0	1	1	0	0
1032	15	6	23	0	0	0	0	0	0	0	0	1	1	0	0	0	0	0	0	0	0	3.65339	13.9951	38.8625	4		0	0	1	1	0	0
1033	17	6	25	0	0	0	0	0	0	1	0	0	0	1	0	0	0	0	0	0	0	4.39414	11.4855	33.9884	4		0	0	1	1	0	0
1034	17	6	25	0	0	0	0	0	0	0	1	0	0	1	0	0	0	0	0	0	0	2.9668	13.6853	31.4565	4		0	0	1	1	0	0
1035	17	6	25	0	0	0	0	0	0	0	0	1	0	1	0	0	0	0	0	0	0	3.24491	11.545	38.3464	4		0	0	1	1	0	0
1036	19	7	28	0	0	0	0	0	0	1	0	0	0	1	0	0	0	0	0	0	0	3.2036	12.3432	36.0449	4		0	0	1	1	0	0
1037	19	7	28	0	0	0	0	0	0	0	1	0	0	1	0	0	0	0	0	0	0	4.22721	12.1326	35.6975	4		0	0	1	1	0	0
1038	19	7	28	0	0	0	0	0	0	0	0	1	0	1	0	0	0	0	0	0	0	3.3767	14.5798	36.2724	4		0	0	1	1	0	0
1039	21	8	31	0	0	0	0	0	0	1	0	0	0	1	0	0	0	0	0	0	0	3.53871	14.0368	34.7398	4		0	0	1	1	0	0
1040	21	8	31	0	0	0	0	0	0	0	1	0	0	1	0	0	0	0	0	0	0	3.78752	12.806	36.7925	4		0	0	1	1	0	0
1041	21	8	31	0	0	0	0	0	0	0	0	1	0	1	0	0	0	0	0	0	0	3.66557	13.2012	38.4625	4		0	0	1	1	0	0
1042	11	4	17	0	0	0	0	0	0	1	0	0	0	1	0	0	0	0	0	0	0	3.66726	13.9186	34.9513	4		0	0	1	1	0	0
1043	11	4	17	0	0	0	0	0	0	0	1	0	0	1	0	0	0	0	0	0	0	3.45139	12.5079	33.726	4		0	0	1	1	0	0
1044	11	4	17	0	0	0	0	0	0	0	0	1	0	1	0	0	0	0	0	0	0	3.7107	11.947	37.0299	4		0	0	1	1	0	0
1045	15	6	23	0	0	0	0	0	0	1	0	0	0	1	0	0	0	0	0	0	0	3.69498	10.4071	35.4035	4		0	0	1	1	0	0
1046	15	6	23	0	0	0	0	0	0	0	1	0	0	1	0	0	0	0	0	0	0	3.89373	13.6337	30.4785	4		0	0	1	1	0	0
1047	15	6	23	0	0	0	0	0	0	0	0	1	0	1	0	0	0	0	0	0	0	3.92565	12.6781	34.6571	4		0	0	1	1	0	0
1048	17	6	25	0	0	0	0	0	0	1	0	0	0	0	1	0	0	0	0	0	0	3.51476	13.6064	39.7231	4		0	0	1	1	0	0
1049	17	6	25	0	0	0	0	0	0	0	1	0	0	0	1	0	0	0	0	0	0	2.92249	10.804	33.3526	4		0	0	1	1	0	0
1050	17	6	25	0	0	0	0	0	0	0	0	1	0	0	1	0	0	0	0	0	0	4.37704	11.4805	39.7555	4		0	0	1	1	0	0
1051	19	7	28	0	0	0	0	0	0	1	0	0	0	0	1	0	0	0	0	0	0	4.02256	12.7827	34.4059	4		0	0	1	1	0	0
1052	19	7	28	0	0	0	0	0	0	0	1	0	0	0	1	0	0	0	0	0	0	4.17045	12.6475	31.5519	4		0	0	1	1	0	0
1053	19	7	28	0	0	0	0	0	0	0	0	1	0	0	1	0	0	0	0	0	0	3.86518	13.4569	33.5596	4		0	0	1	1	0	0
1054	21	8	31	0	0	0	0	0	0	1	0	0	0	0	1	0	0	0	0	0	0	3.90369	13.3529	36.488	4		0	0	1	1	0	0
1055	21	8	31	0	0	0	0	0	0	0	1	0	0	0	1	0	0	0	0	0	0	3.54131	13.1243	32.6344	4		0	0	1	1	0	0
1056	21	8	31	0	0	0	0	0	0	0	0	1	0	0	1	0	0	0	0	0	0	4.12013	13.9469	30.7917	4		0	0	1	1	0	0
1057	11	4	17	0	0	0	0	0	0	1	0	0	0	0	1	0	0	0	0	0	0	2.99137	13.5813	34.4116	4		0	0	1	1	0	0
1058	11	4	17	0	0	0	0	0	0	0	1	0	0	0	1	0	0	0	0	0	0	4.81294	13.4117	30.834	4		0	0	1	1	0	0
1059	11	4	17	0	0	0	0	0	0	0	0	1	0	0	1	0	0	0	0	0	0	3.91449	12.8888	38.3524	4		0	0	1	1	0	0
1060	15	6	23	0	0	0	0	0	0	1	0	0	0	0	1	0	0	0	0	0	0	3.27094	13.2372	31.6207	4		0	0	1	1	0	0
1061	15	6	23	0	0	0	0	0	0	0	1	0	0	0	1	0	0	0	0	0	0	4.42042	13.0863	33.9739	4		0	0	1	1	0	0
1062	15	6	23	0	0	0	0	0	0	0	0	1	0	0	1	0	0	0	0	0	0	3.09353	13.0797	37.8966	4		0	0	1	1	0	0
1063	19	11	34	0	0	0	0	0	0	1	0	0	1	0	0	0	0	0	0	0	0	3.53992	10.6016	34.1278	4		0	0	1	1	0	0
1064	19	11	34	0	0	0	0	0	0	0	1	0	1	0	0	0	0	0	0	0	0	3.27938	13.954	34.7484	4		0	0	1	1	0	0
1065	19	11	34	0	0	0	0	0	0	0	0	1	1	0	0	0	0	0	0	0	0	4.19646	11.776	36.9916	4		0	0	1	1	0	0
1066	19	11	34	0	0	0	0	0	0	1	0	0	0	1	0	0	0	0	0	0	0	3.76604	13.2806	34.796	4		0	0	1	1	0	0
1067	19	11	34	0	0	0	0	0	0	0	1	0	0	1	0	0	0	0	0	0	0	4.29255	11.726	39.1972	4		0	0	1	1	0	0
1068	19	11	34	0	0	0	0	0	0	0	0	1	0	1	0	0	0	0	0	0	0	4.24805	14.4952	37.6754	4		0	0	1	1	0	0
1069	19	11	34	0	0	0	0	0	0	1	0	0	0	0	1	0	0	0	0	0	0	3.61569	10.3287	32.3918	4		0	0	1	1	0	0
1070	19	11	34	0	0	0	0	0	0	0	1	0	0	0	1	0	0	0	0	0	0	3.73048	11.1755	33.6764	4		0	0	1	1	0	0
1071	19	11	34	0	0	0	0	0	0	0	0	1	0	0	1	0	0	0	0	0	0	3.80946	11.291	35.5293	4		0	0	1	1	0	0
1072	18	6	26	0	0	0	1	0	0	0	0	0	1	0	0	0	0	0	0	0	0	3.97102	10.9206	37.7397	4		0	1	0	1	0	0
1073	18	6	26	0	0	0	1	0	0	0	0	0	0	1	0	0	0	0	0	0	0	3.11877	11.7571	33.0746	4		0	1	0	1	0	0
1074	18	6	26	0	0	0	1	0	0	0	0	0	0	0	1	0	0	0	0	0	0	3.20981	12.4998	35.3982	4		0	1	0	1	0	0
1075	18	6	26	0	0	0	0	1	0	0	0	0	1	0	0	0	0	0	0	0	0	3.99027	12.3082	38.0985	4		0	1	0	1	0	0
1076	18	6	26	0	0	0	0	1	0	0	0	0	0	1	0	0	0	0	0	0	0	3.91218	14.1035	33.1164	4		0	1	0	1	0	0
1077	18	6	26	0	0	0	0	1	0	0	0	0	0	0	1	0	0	0	0	0	0	2.90189	11.3159	38.2597	4		0	1	0	1	0	0
1078	18	6	26	0	0	0	0	0	1	0	0	0	1	0	0	0	0	0	0	0	0	3.4535	12.2769	33.8286	4		0	1	0	1	0	0
1079	18	6	26	0	0	0	0	0	1	0	0	0	0	1	0	0	0	0	0	0	0	3.41921	13.6436	30.0572	4		0	1	0	1	0	0
1080	18	6	26	0	0	0	0	0	1	0	0	0	0	0	1	0	0	0	0	0	0	4.37486	13.6769	35.814	4		0	1	0	1	0	0
1081	18	7	27	0	0	0	1	0	0	0	0	0	1	0	0	0	0	0	0	0	0	3.22659	11.2605	36.6422	4		0	1	0	1	0	0
1082	18	7	27	0	0	0	1	0	0	0	0	0	0	1	0	0	0	0	0	0	0	3.05947	12.5395	37.6113	4		0	1	0	1	0	0
1083	18	7	27	0	0	0	1	0	0	0	0	0	0	0	1	0	0	0	0	0	0	2.94341	12.1514	39.7617	4		0	1	0	1	0	0
1084	18	7	27	0	0	0	0	1	0	0	0	0	1	0	0	0	0	0	0	0	0	3.52563	14.1958	36.7978	4		0	1	0	1	0	0
1085	18	7	27	0	0	0	0	1	0	0	0	0	0	1	0	0	0	0	0	0	0	3.54236	12.2299	35.5236	4		0	1	0	1	0	0
1086	18	7	27	0	0	0	0	1	0	0	0	0	0	0	1	0	0	0	0	0	0	3.41382	12.257	34.1854	4		0	1	0	1	0	0
1087	18	7	27	0	0	0	0	0	1	0	0	0	1	0	0	0	0	0	0	0	0	3.13011	11.6564	35.7432	4		0	1	0	1	0	0
1088	18	7	27	0	0	0	0	0	1	0	0	0	0	1	0	0	0	0	0	0	0	3.65509	13.3165	34.4596	4		0	1	0	1	0	0
1089	18	7	27	0	0	0	0	0	1	0	0	0	0	0	1	0	0	0	0	0	0	3.84227	14.448	37.9384	4		0	1	0	1	0	0
1090	15	6	24	0	0	0	1	0	0	0	0	0	2	0	0	0	0	0	0	0	0	3.70544	13.4062	30.9969	4		0	1	0	2	0	0
1091	15	6	24	0	0	0	1	0	0	0	0	0	0	2	0	0	0	0	0	0	0	3.47395	11.8356	33.4157	4		0	1	0	2	0	0
1092	15	6	24	0	0	0	1	0	0	0	0	0	0	0	2	0	0	0	0	0	0	2.94267	11.6774	37.069	4		0	1	0	2	0	0
1093	15	6	24	0	0	0	0	1	0	0	0	0	2	0	0	0	0	0	0	0	0	3.07256	12.7665	36.3932	4		0	1	0	2	0	0
1094	15	6	24	0	0	0	0	1	0	0	0	0	0	2	0	0	0	0	0	0	0	3.55036	11.6301	37.536	4		0	1	0	2	0	0
1095	15	6	24	0	0	0	0	1	0	0	0	0	0	0	2	0	0	0	0	0	0	2.99232	14.3353	35.2543	4		0	1	0	2	0	0
1096	15	6	24	0	0	0	0	0	1	0	0	0	2	0	0	0	0	0	0	0	0	4.48774	10.0824	36.0591	4		0	1	0	2	0	0
1097	15	6	24	0	0	0	0	0	1	0	0	0	0	2	0	0	0	0	0	0	0	4.11047	12.7394	36.6094	4		0	1	0	2	0	0
1098	15	6	24	0	0	0	0	0	1	0	0	0	0	0	2	0	0	0	0	0	0	4.40753	13.9341	35.0282	4		0	1	0	2	0	0
1099	16	8	28	0	0	0	2	0	0	0	0	0	2	0	0	0	0	0	0	0	0	4.00459	11.8754	36.915	4		0	2	0	2	0	0
1100	16	8	28	0	0	0	2	0	0	0	0	0	0	2	0	0	0	0	0	0	0	3.64374	11.323	32.2465	4		0	2	0	2	0	0
1101	16	8	28	0	0	0	2	0	0	0	0	0	0	0	2	0	0	0	0	0	0	4.2703	13.8942	33.6079	4		0	2	0	2	0	0
1102	16	8	28	0	0	0	0	2	0	0	0	0	2	0	0	0	0	0	0	0	0	3.76581	12.7477	30.1353	4		0	2	0	2	0	0
1103	16	8	28	0	0	0	0	2	0	0	0	0	0	2	0	0	0	0	0	0	0	2.99115	11.5424	31.1976	4		0	2	0	2	0	0
1104	16	8	28	0	0	0	0	2	0	0	0	0	0	0	2	0	0	0	0	0	0	3.38586	11.0914	34.2535	4		0	2	0	2	0	0
1105	16	8	28	0	0	0	0	0	2	0	0	0	2	0	0	0	0	0	0	0	0	4.02399	10.2479	36.0789	4		0	2	0	2	0	0
1106	16	8	28	0	0	0	0	0	2	0	0	0	0	2	0	0	0	0	0	0	0	4.90631	11.3845	31.7781	4		0	2	0	2	0	0
1107	16	8	28	0	0	0	0	0	2	0	0	0	0	0	2	0	0	0	0	0	0	4.53661	11.8893	36.3503	4		0	2	0	2	0	0
1108	10	6	25	0	0	0	0	0	0	2	0	0	0	0	0	0	0	0	0	0	0	3.40262	12.348	37.5755	4		0	0	2	0	0	0
1109	10	6	25	0	0	0	0	0	0	0	2	0	0	0	0	0	0	0	0	0	0	4.2007	11.1938	33.2209	4		0	0	2	0	0	0
1110	10	6	25	0	0	0	0	0	0	0	0	2	0	0	0	0	0	0	0	0	0	3.48946	13.0901	36.1082	4		0	0	2	0	0	0
1111	27	13	42	0	0	0	0	0	0	1	0	0	0	0	0	0	0	0	0	0	0	3.39088	11.783	37.3325	4		0	0	1	0	0	0
1112	27	13	42	0	0	0	0	0	0	0	1	0	0	0	0	0	0	0	0	0	0	3.5889	11.5156	37.8727	4		0	0	1	0	0	0
1113	27	13	42	0	0	0	0	0	0	0	0	1	0	0	0	0	0	0	0	0	0	3.73876	12.0842	36.4642	4		0	0	1	0	0	0
1114	17	8	30	0	0	0	0	0	0	1	0	0	0	0	0	0	0	0	0	0	0	3.4364	11.7775	33.873	4		0	0	1	0	0	0
1115	17	8	30	0	0	0	0	0	0	0	1	0	0	0	0	0	0	0	0	0	0	4.33093	12.0709	37.806	4		0	0	1	0	0	0
1116	17	8	30	0	0	0	0	0	0	0	0	1	0	0	0	0	0	0	0	0	0	3.42732	10.3218	33.5295	4		0	0	1	0	0	0
1117	18	7	27	0	0	0	0	0	0	1	0	0	0	0	0	0	0	0	0	0	0	3.66963	10.051	38.9986	4		0	0	1	0	0	0
1118	18	7	27	0	0	0	0	0	0	0	1	0	0	0	0	0	0	0	0	0	0	3.93486	13.78	32.3927	4		0	0	1	0	0	0
1119	18	7	27	0	0	0	0	0	0	0	0	1	0	0	0	0	0	0	0	0	0	4.30381	11.0791	38.2479	4		0	0	1	0	0	0
1120	22	17	46	0	0	0	0	0	0	1	0	0	0	0	0	0	0	0	0	0	0	3.66754	11.72	38.667	4		0	0	1	0	0	0
1121	22	17	46	0	0	0	0	0	0	0	1	0	0	0	0	0	0	0	0	0	0	4.09513	11.6843	33.8375	4		0	0	1	0	0	0
1122	22	17	46	0	0	0	0	0	0	0	0	1	0	0	0	0	0	0	0	0	0	2.89518	13.9217	39.4627	4		0	0	1	0	0	0
1123	16	8	27	0	0	0	0	0	0	2	0	0	0	0	0	0	0	0	0	0	0	2.94019	10.7467	39.3743	4		0	0	2	0	0	0
1124	16	8	27	0	0	0	0	0	0	0	2	0	0	0	0	0	0	0	0	0	0	3.40858	12.1016	37.0272	4		0	0	2	0	0	0
1125	16	8	27	0	0	0	0	0	0	0	0	2	0	0	0	0	0	0	0	0	0	3.98093	13.1251	35.3393	4		0	0	2	0	0	0
1126	14	14	31	0	0	0	0	0	0	2	0	0	0	0	0	0	0	0	0	0	0	4.11464	13.6876	35.0403	4		0	0	2	0	0	0
1127	14	14	31	0	0	0	0	0	0	0	2	0	0	0	0	0	0	0	0	0	0	3.81357	12.1426	36.2593	4		0	0	2	0	0	0
1128	14	14	31	0	0	0	0	0	0	0	0	2	0	0	0	0	0	0	0	0	0	4.5995	12.3166	36.5125	4		0	0	2	0	0	0
1129	8	4	13	0	0	0	0	0	0	1	0	0	0	0	0	0	0	0	0	0	0	2.96511	10.4825	34.3594	4		0	0	1	0	0	0
1130	8	4	13	0	0	0	0	0	0	0	1	0	0	0	0	0	0	0	0	0	0	3.09904	12.4541	36.3125	4		0	0	1	0	0	0
1131	8	4	13	0	0	0	0	0	0	0	0	1	0	0	0	0	0	0	0	0	0	2.82579	13.2891	39.1802	4		0	0	1	0	0	0
1132	22	18	41	0	0	0	0	0	0	1	0	0	0	0	0	0	0	0	0	0	0	3.60999	12.0171	33.2723	4		0	0	1	0	0	0
1133	22	18	41	0	0	0	0	0	0	0	1	0	0	0	0	0	0	0	0	0	0	3.7582	13.9531	36.0505	4		0	0	1	0	0	0
1134	22	18	41	0	0	0	0	0	0	0	0	1	0	0	0	0	0	0	0	0	0	3.94185	12.9501	32.4477	4		0	0	1	0	0	0
1135	10	11	22	0	0	0	0	0	0	1	0	0	0	0	0	0	0	0	0	0	0	3.02528	10.4595	39.3571	4		0	0	1	0	0	0
1136	10	11	22	0	0	0	0	0	0	0	1	0	0	0	0	0	0	0	0	0	0	4.07278	13.453	35.6765	4		0	0	1	0	0	0
1137	10	11	22	0	0	0	0	0	0	0	0	1	0	0	0	0	0	0	0	0	0	4.00742	11.3825	30.3264	4		0	0	1	0	0	0
1138	16	4	28	0	0	0	0	0	0	2	0	0	0	0	0	0	0	0	0	0	0	3.32119	12.0114	36.2176	4		0	0	2	0	0	0
1139	16	4	28	0	0	0	0	0	0	0	2	0	0	0	0	0	0	0	0	0	0	3.42967	14.5412	35.6149	4		0	0	2	0	0	0
1140	16	4	28	0	0	0	0	0	0	0	0	2	0	0	0	0	0	0	0	0	0	4.74164	14.1659	32.2541	4		0	0	2	0	0	0
1141	10	11	22	0	0	0	0	0	0	1	0	0	0	0	0	0	0	0	0	0	0	3.58907	12.0252	34.3148	4		0	0	1	0	0	0
1142	10	11	22	0	0	0	0	0	0	0	1	0	0	0	0	0	0	0	0	0	0	3.54587	10.9722	37.8335	4		0	0	1	0	0	0
1143	10	11	22	0	0	0	0	0	0	0	0	1	0	0	0	0	0	0	0	0	0	4.33084	11.4738	37.8681	4		0	0	1	0	0	0
1144	20	16	38	0	0	0	0	0	0	1	0	0	0	0	0	0	0	0	0	0	0	2.82359	12.07	34.1656	4		0	0	1	0	0	0
1145	20	16	38	0	0	0	0	0	0	0	1	0	0	0	0	0	0	0	0	0	0	3.95303	11.4572	33.5898	4		0	0	1	0	0	0
1146	20	16	38	0	0	0	0	0	0	0	0	1	0	0	0	0	0	0	0	0	0	3.42347	12.8967	36.7305	4		0	0	1	0	0	0
1147	20	24	45	0	0	0	0	0	0	1	0	0	0	0	0	0	0	0	0	0	0	3.73847	10.7702	34.3124	4		0	0	1	0	0	0
1148	20	24	45	0	0	0	0	0	0	0	1	0	0	0	0	0	0	0	0	0	0	3.64031	13.7353	36.746	4		0	0	1	0	0	0
1149	20	24	45	0	0	0	0	0	0	0	0	1	0	0	0	0	0	0	0	0	0	4.52153	12.7807	34.8237	4		0	0	1	0	0	0
1150	18	20	43	0	0	0	0	0	0	1	0	0	0	0	0	0	0	0	0	0	0	4.27839	10.6472	34.3211	4		0	0	1	0	0	0
1151	18	20	43	0	0	0	0	0	0	0	1	0	0	0	0	0	0	0	0	0	0	3.75029	10.4648	33.437	4		0	0	1	0	0	0
1152	18	20	43	0	0	0	0	0	0	0	0	1	0	0	0	0	0	0	0	0	0	4.60004	13.3002	35.6399	4		0	0	1	0	0	0
1153	12	6	24	0	0	0	0	0	0	1	0	0	0	0	0	0	0	0	0	0	0	3.67711	12.0528	35.6367	4		0	0	1	0	0	0
1154	12	6	24	0	0	0	0	0	0	0	1	0	0	0	0	0	0	0	0	0	0	3.75233	11.9797	33.5499	4		0	0	1	0	0	0
1155	12	6	24	0	0	0	0	0	0	0	0	1	0	0	0	0	0	0	0	0	0	3.07993	12.5023	36.3508	4		0	0	1	0	0	0
1156	24	8	35	0	0	0	0	0	0	3	0	0	0	0	0	0	0	0	0	0	0	3.14281	14.6093	37.7135	4		0	0	3	0	0	0
1157	24	8	35	0	0	0	0	0	0	0	3	0	0	0	0	0	0	0	0	0	0	3.91635	12.6554	36.7626	4		0	0	3	0	0	0
1158	24	8	35	0	0	0	0	0	0	0	0	3	0	0	0	0	0	0	0	0	0	3.69922	14.9944	36.5136	4		0	0	3	0	0	0
1159	24	8	35	0	0	0	0	0	0	2	1	0	0	0	0	0	0	0	0	0	0	3.94797	11.8825	33.6303	4		0	0	3	0	0	0
1160	24	8	35	0	0	0	0	0	0	2	0	1	0	0	0	0	0	0	0	0	0	3.44241	13.2071	31.2608	4		0	0	3	0	0	0
1161	24	8	35	0	0	0	0	0	0	0	2	1	0	0	0	0	0	0	0	0	0	3.53639	13.2087	36.1679	4		0	0	3	0	0	0
1162	8	6	15	0	0	0	0	0	0	1	0	0	0	0	0	0	0	0	0	0	0	3.85805	11.9859	39.1686	4		0	0	1	0	0	0
1163	8	6	15	0	0	0	0	0	0	0	1	0	0	0	0	0	0	0	0	0	0	4.34744	10.864	39.9037	4		0	0	1	0	0	0
1164	8	6	15	0	0	0	0	0	0	0	0	1	0	0	0	0	0	0	0	0	0	3.99412	11.2298	35.7336	4		0	0	1	0	0	0
1165	10	7	18	0	0	0	0	0	0	1	0	0	0	0	0	0	0	0	0	0	0	3.89451	12.0983	37.1418	4		0	0	1	0	0	0
1166	10	7	18	0	0	0	0	0	0	0	1	0	0	0	0	0	0	0	0	0	0	3.40123	12.9216	35.0617	4		0	0	1	0	0	0
1167	10	7	18	0	0	0	0	0	0	0	0	1	0	0	0	0	0	0	0	0	0	4.04435	11.1963	31.5501	4		0	0	1	0	0	0
1168	12	8	21	0	0	0	0	0	0	1	0	0	0	0	0	0	0	0	0	0	0	4.30499	12.0027	39.4323	4		0	0	1	0	0	0
1169	12	8	21	0	0	0	0	0	0	0	1	0	0	0	0	0	0	0	0	0	0	4.00483	14.346	32.6495	4		0	0	1	0	0	0
1170	12	8	21	0	0	0	0	0	0	0	0	1	0	0	0	0	0	0	0	0	0	4.74258	11.96	34.3875	4		0	0	1	0	0	0
1171	14	9	24	0	0	0	0	0	0	1	0	0	0	0	0	0	0	0	0	0	0	2.98236	13.5259	31.2813	4		0	0	1	0	0	0
1172	14	9	24	0	0	0	0	0	0	0	1	0	0	0	0	0	0	0	0	0	0	3.8367	12.1638	34.2688	4		0	0	1	0	0	0
1173	14	9	24	0	0	0	0	0	0	0	0	1	0	0	0	0	0	0	0	0	0	3.87233	11.3287	35.5233	4		0	0	1	0	0	0
1174	20	14	38	0	0	0	0	0	0	1	0	0	0	0	0	0	0	0	0	0	0	3.64676	11.6171	37.4176	4		0	0	1	0	0	0
1175	20	14	38	0	0	0	0	0	0	3	0	0	0	0	0	0	0	0	0	0	0	3.74146	11.2083	37.0574	4		0	0	3	0	0	0
1176	20	14	38	0	0	0	0	0	0	1	2	0	0	0	0	0	0	0	0	0	0	3.87403	14.0596	34.55	4		0	0	3	0	0	0
1177	20	14	38	0	0	0	0	0	0	1	0	2	0	0	0	0	0	0	0	0	0	3.65554	14.431	35.3471	4		0	0	3	0	0	0
1178	20	14	38	0	0	0	0	0	0	0	1	0	0	0	0	0	0	0	0	0	0	4.30373	12.5595	37.0993	4		0	0	1	0	0	0
1179	20	14	38	0	0	0	0	0	0	2	1	0	0	0	0	0	0	0	0	0	0	3.82382	11.2383	34.876	4		0	0	3	0	0	0
1180	20	14	38	0	0	0	0	0	0	0	3	0	0	0	0	0	0	0	0	0	0	3.59206	13.0783	37.7151	4		0	0	3	0	0	0
1181	20	14	38	0	0	0	0	0	0	0	1	2	0	0	0	0	0	0	0	0	0	3.96259	12.7794	33.8086	4		0	0	3	0	0	0
1182	20	14	38	0	0	0	0	0	0	0	0	1	0	0	0	0	0	0	0	0	0	3.55679	12.8825	34.4064	4		0	0	1	0	0	0
1183	20	14	38	0	0	0	0	0	0	2	0	1	0	0	0	0	0	0	0	0	0	4.53496	12.0189	37.7717	4		0	0	3	0	0	0
1184	20	14	38	0	0	0	0	0	0	0	2	1	0	0	0	0	0	0	0	0	0	3.49035	12.9332	32.6163	4		0	0	3	0	0	0
1185	20	14	38	0	0	0	0	0	0	0	0	3	0	0	0	0	0	0	0	0	0	4.28362	13.6343	36.1762	4		0	0	3	0	0	0
1186	6	1	8	0	0	0	0	0	0	1	0	0	0	0	0	0	0	0	0	0	0	3.21349	11.2145	33.0047	4		0	0	1	0	0	0
1187	6	1	8	0	0	0	0	0	0	0	1	0	0	0	0	0	0	0	0	0	0	3.58845	14.3449	38.2861	4		0	0	1	0	0	0
1188	6	1	8	0	0	0	0	0	0	0	0	1	0	0	0	0	0	0	0	0	0	4.55564	12.9681	34.1887	4		0	0	1	0	0	0
1189	8	2	11	0	0	0	0	0	0	1	0	0	0	0	0	0	0	0	0	0	0	2.96767	11.3725	33.0798	4		0	0	1	0	0	0
1190	8	2	11	0	0	0	0	0	0	0	1	0	0	0	0	0	0	0	0	0	0	3.71182	10.8635	36.453	4		0	0	1	0	0	0
1191	8	2	11	0	0	0	0	0	0	0	0	1	0	0	0	0	0	0	0	0	0	3.33256	12.186	34.5695	4		0	0	1	0	0	0
1192	10	3	14	0	0	0	0	0	0	1	0	0	0	0	0	0	0	0	0	0	0	3.89082	13.7495	32.7491	4		0	0	1	0	0	0
1193	10	3	14	0	0	0	0	0	0	0	1	0	0	0	0	0	0	0	0	0	0	3.59478	11.6973	32.6776	4		0	0	1	0	0	0
1194	10	3	14	0	0	0	0	0	0	0	0	1	0	0	0	0	0	0	0	0	0	4.31106	13.2077	36.5153	4		0	0	1	0	0	0
1195	12	4	17	0	0	0	0	0	0	1	0	0	0	0	0	0	0	0	0	0	0	3.71058	13.0598	34.6442	4		0	0	1	0	0	0
1196	12	4	17	0	0	0	0	0	0	0	1	0	0	0	0	0	0	0	0	0	0	3.3418	12.2789	37.8132	4		0	0	1	0	0	0
1197	12	4	17	0	0	0	0	0	0	0	0	1	0	0	0	0	0	0	0	0	0	4.29219	11.6918	38.6255	4		0	0	1	0	0	0
1198	16	6	23	0	0	0	0	0	0	1	0	0	0	0	0	0	0	0	0	0	0	3.44237	12.7086	34.1028	4		0	0	1	0	0	0
1199	16	6	23	0	0	0	0	0	0	0	1	0	0	0	0	0	0	0	0	0	0	2.74451	12.6389	33.361	4		0	0	1	0	0	0
1200	16	6	23	0	0	0	0	0	0	0	0	1	0	0	0	0	0	0	0	0	0	3.58975	13.7175	34.2642	4		0	0	1	0	0	0
1201	20	9	30	0	0	0	0	0	0	1	0	0	0	0	0	0	0	0	0	0	0	3.43669	14.8032	35.1704	4		0	0	1	0	0	0
1202	20	9	30	0	0	0	0	0	0	0	1	0	0	0	0	0	0	0	0	0	0	3.7136	10.4113	33.2004	4		0	0	1	0	0	0
1203	20	9	30	0	0	0	0	0	0	0	0	1	0	0	0	0	0	0	0	0	0	4.30601	14.3795	35.0798	4		0	0	1	0	0	0
1204	20	10	31	0	0	0	0	0	0	1	0	0	0	0	0	0	0	0	0	0	0	3.62923	13.7521	34.7103	4		0	0	1	0	0	0
1205	20	10	31	0	0	0	0	0	0	0	1	0	0	0	0	0	0	0	0	0	0	3.34251	12.3656	36.8085	4		0	0	1	0	0	0
1206	20	10	31	0	0	0	0	0	0	0	0	1	0	0	0	0	0	0	0	0	0	3.9815	12.2897	37.1401	4		0	0	1	0	0	0
1207	18	10	29	0	0	0	0	0	0	1	0	0	0	0	0	0	0	0	0	0	0	3.42342	12.1074	36.7117	4		0	0	1	0	0	0
1208	18	10	29	0	0	0	0	0	0	0	1	0	0	0	0	0	0	0	0	0	0	3.71071	11.1288	32.6128	4		0	0	1	0	0	0
1209	18	10	29	0	0	0	0	0	0	0	0	1	0	0	0	0	0	0	0	0	0	2.99398	13.6175	33.7315	4		0	0	1	0	0	0
1210	16	8	25	0	0	0	0	0	0	1	0	0	0	0	0	0	0	0	0	0	0	3.61455	14.4923	38.7947	4		0	0	1	0	0	0
1211	16	8	25	0	0	0	0	0	0	0	1	0	0	0	0	0	0	0	0	0	0	3.51939	14.9852	32.5908	4		0	0	1	0	0	0
1212	16	8	25	0	0	0	0	0	0	0	0	1	0	0	0	0	0	0	0	0	0	4.38438	12.982	37.3132	4		0	0	1	0	0	0
1213	10	3	15	0	0	0	0	0	0	1	0	0	0	0	0	0	0	0	0	0	0	4.35824	12.7123	38.6911	4		0	0	1	0	0	0
1214	10	3	15	0	0	0	0	0	0	0	1	0	0	0	0	0	0	0	0	0	0	3.29726	12.0971	37.9	4		0	0	1	0	0	0
1215	10	3	15	0	0	0	0	0	0	0	0	1	0	0	0	0	0	0	0	0	0	3.61825	11.3897	36.5862	4		0	0	1	0	0	0
1216	12	4	18	0	0	0	0	0	0	1	0	0	0	0	0	0	0	0	0	0	0	3.72761	11.86	32.5474	4		0	0	1	0	0	0
1217	12	4	18	0	0	0	0	0	0	0	1	0	0	0	0	0	0	0	0	0	0	3.33386	12.9488	34.2482	4		0	0	1	0	0	0
1218	12	4	18	0	0	0	0	0	0	0	0	1	0	0	0	0	0	0	0	0	0	3.27274	11.2241	32.1772	4		0	0	1	0	0	0
1219	20	8	30	0	0	0	0	0	0	1	0	0	0	0	0	0	0	0	0	0	0	3.70494	10.5458	33.114	4		0	0	1	0	0	0
1220	20	8	30	0	0	0	0	0	0	1	0	0	0	0	0	0	0	0	0	0	0	2.97344	14.7248	33.0925	4		0	0	1	0	0	0
1221	20	8	30	0	0	0	0	0	0	0	1	0	0	0	0	0	0	0	0	0	0	3.58426	12.1049	31.741	4		0	0	1	0	0	0
1222	20	8	30	0	0	0	0	0	0	0	1	0	0	0	0	0	0	0	0	0	0	3.18511	11.2889	35.3513	4		0	0	1	0	0	0
1223	20	8	30	0	0	0	0	0	0	0	0	1	0	0	0	0	0	0	0	0	0	4.56515	14.5051	39.1247	4		0	0	1	0	0	0
1224	20	8	30	0	0	0	0	0	0	0	0	1	0	0	0	0	0	0	0	0	0	3.53802	13.5825	34.1722	4		0	0	1	0	0	0
1225	16	7	24	0	0	0	0	0	0	1	0	0	0	0	0	0	0	0	0	0	0	3.55312	12.628	34.6061	4		0	0	1	0	0	0
1226	16	7	24	0	0	0	0	0	0	0	1	0	0	0	0	0	0	0	0	0	0	4.52712	12.6797	39.5268	4		0	0	1	0	0	0
1227	16	7	24	0	0	0	0	0	0	0	0	1	0	0	0	0	0	0	0	0	0	3.10585	14.3709	33.6643	4		0	0	1	0	0	0
1228	16	8	25	0	0	0	0	0	0	1	0	0	0	0	0	0	0	0	0	0	0	3.85078	14.7962	30.3624	4		0	0	1	0	0	0
1229	16	8	25	0	0	0	0	0	0	0	1	0	0	0	0	0	0	0	0	0	0	3.3483	14.3239	37.5473	4		0	0	1	0	0	0
1230	16	8	25	0	0	0	0	0	0	0	0	1	0	0	0	0	0	0	0	0	0	3.33109	14.0494	35.4518	4		0	0	1	0	0	0
1231	18	9	28	0	0	0	0	0	0	1	0	0	0	0	0	0	0	0	0	0	0	3.53898	11.1648	35.5837	4		0	0	1	0	0	0
1232	18	9	28	0	0	0	0	0	0	0	1	0	0	0	0	0	0	0	0	0	0	3.63497	12.9224	38.2175	4		0	0	1	0	0	0
1233	18	9	28	0	0	0	0	0	0	0	0	1	0	0	0	0	0	0	0	0	0	4.44972	13.262	37.3454	4		0	0	1	0	0	0
1234	16	9	26	0	0	0	0	0	0	1	0	0	0	0	0	0	0	0	0	0	0	3.81178	13.7481	34.9667	4		0	0	1	0	0	0
1235	16	9	26	0	0	0	0	0	0	0	1	0	0	0	0	0	0	0	0	0	0	3.29046	12.3672	30.6004	4		0	0	1	0	0	0
1236	16	9	26	0	0	0	0	0	0	0	0	1	0	0	0	0	0	0	0	0	0	3.42593	12.4621	38.6218	4		0	0	1	0	0	0
1237	20	7	29	0	0	0	0	0	0	2	0	0	0	0	0	0	0	0	0	0	0	3.86863	14.2165	34.513	4		0	0	2	0	0	0
1238	20	7	29	0	0	0	0	0	0	0	2	0	0	0	0	0	0	0	0	0	0	3.14397	13.1647	38.0983	4		0	0	2	0	0	0
1239	20	7	29	0	0	0	0	0	0	0	0	2	0	0	0	0	0	0	0	0	0	3.68628	14.0671	36.718	4		0	0	2	0	0	0
1240	24	10	36	0	0	0	0	0	0	2	0	0	0	0	0	0	0	0	0	0	0	3.32515	13.9533	34.4206	4		0	0	2	0	0	0
1241	24	10	36	0	0	0	0	0	0	0	2	0	0	0	0	0	0	0	0	0	0	3.38447	12.6221	31.2598	4		0	0	2	0	0	0
1242	24	10	36	0	0	0	0	0	0	0	0	2	0	0	0	0	0	0	0	0	0	3.68245	10.9713	36.5019	4		0	0	2	0	0	0
1243	22	10	34	0	0	0	0	0	0	2	0	0	0	0	0	0	0	0	0	0	0	4.32814	11.7817	34.0313	4		0	0	2	0	0	0
1244	22	10	34	0	0	0	0	0	0	0	2	0	0	0	0	0	0	0	0	0	0	3.53509	10.3161	37.9003	4		0	0	2	0	0	0
1245	22	10	34	0	0	0	0	0	0	0	0	2	0	0	0	0	0	0	0	0	0	3.40203	11.3193	33.5925	4		0	0	2	0	0	0
1246	18	6	30	0	0	0	0	0	0	3	0	0	0	0	0	0	0	0	0	0	0	3.61444	14.3994	36.6616	4		0	0	3	0	0	0
1247	18	6	30	0	0	0	0	0	0	0	3	0	0	0	0	0	0	0	0	0	0	2.85989	12.4355	38.6718	4		0	0	3	0	0	0
1248	18	6	30	0	0	0	0	0	0	0	0	3	0	0	0	0	0	0	0	0	0	4.23463	11.9451	36.4331	4		0	0	3	0	0	0
1249	14	6	22	0	0	0	0	0	0	1	0	0	0	0	0	0	0	0	0	0	0	3.99084	12.4477	32.3252	4		0	0	1	0	0	0
1250	14	6	22	0	0	0	0	0	0	0	1	0	0	0	0	0	0	0	0	0	0	4.01295	10.3994	39.5919	4		0	0	1	0	0	0
1251	14	6	22	0	0	0	0	0	0	0	0	1	0	0	0	0	0	0	0	0	0	4.41637	13.4242	31.4499	4		0	0	1	0	0	0
1252	10	5	17	0	0	0	0	0	0	1	0	0	0	0	0	0	0	0	0	0	0	3.47892	14.4828	37.0939	4		0	0	1	0	0	0
1253	10	5	17	0	0	0	0	0	0	0	1	0	0	0	0	0	0	0	0	0	0	4.51297	10.1859	34.2821	4		0	0	1	0	0	0
1254	10	5	17	0	0	0	0	0	0	0	0	1	0	0	0	0	0	0	0	0	0	4.11891	12.2936	35.045	4		0	0	1	0	0	0
1255	18	8	29	0	0	0	0	0	0	1	0	0	0	0	0	0	0	0	0	0	0	3.68685	12.5794	34.41	4		0	0	1	0	0	0
1256	18	8	29	0	0	0	0	0	0	0	1	0	0	0	0	0	0	0	0	0	0	3.33937	13.22	35.4761	4		0	0	1	0	0	0
1257	18	8	29	0	0	0	0	0	0	0	0	1	0	0	0	0	0	0	0	0	0	3.49724	11.5186	37.3287	4		0	0	1	0	0	0
1258	13	6	23	0	0	0	0	0	0	1	0	0	0	0	0	0	0	0	0	0	0	4.03203	12.7329	31.4689	4		0	0	1	0	0	0
1259	13	6	23	0	0	0	0	0	0	0	1	0	0	0	0	0	0	0	0	0	0	4.21075	14.9124	30.9472	4		0	0	1	0	0	0
1260	13	6	23	0	0	0	0	0	0	0	0	1	0	0	0	0	0	0	0	0	0	4.2827	14.8437	35.6277	4		0	0	1	0	0	0
1261	17	6	25	0	0	0	0	0	0	1	0	0	0	0	0	0	0	0	0	0	0	4.77219	12.2993	34.848	4		0	0	1	0	0	0
1262	17	6	25	0	0	0	0	0	0	0	1	0	0	0	0	0	0	0	0	0	0	4.14224	12.5503	36.5989	4		0	0	1	0	0	0
1263	17	6	25	0	0	0	0	0	0	0	0	1	0	0	0	0	0	0	0	0	0	3.30482	12.0786	31.5964	4		0	0	1	0	0	0
1264	19	7	28	0	0	0	0	0	0	1	0	0	0	0	0	0	0	0	0	0	0	3.30364	12.3185	39.4662	4		0	0	1	0	0	0
1265	19	7	28	0	0	0	0	0	0	0	1	0	0	0	0	0	0	0	0	0	0	3.36503	12.1928	36.794	4		0	0	1	0	0	0
1266	19	7	28	0	0	0	0	0	0	0	0	1	0	0	0	0	0	0	0	0	0	3.99279	13.5606	33.8218	4		0	0	1	0	0	0
1267	21	8	31	0	0	0	0	0	0	1	0	0	0	0	0	0	0	0	0	0	0	4.12081	12.8911	36.4904	4		0	0	1	0	0	0
1268	21	8	31	0	0	0	0	0	0	0	1	0	0	0	0	0	0	0	0	0	0	3.0696	11.7868	37.6676	4		0	0	1	0	0	0
1269	21	8	31	0	0	0	0	0	0	0	0	1	0	0	0	0	0	0	0	0	0	3.51729	13.36	37.2041	4		0	0	1	0	0	0
1270	11	4	17	0	0	0	0	0	0	1	0	0	0	0	0	0	0	0	0	0	0	3.71451	11.7718	34.2513	4		0	0	1	0	0	0
1271	11	4	17	0	0	0	0	0	0	0	1	0	0	0	0	0	0	0	0	0	0	3.897	14.0179	35.7122	4		0	0	1	0	0	0
1272	11	4	17	0	0	0	0	0	0	0	0	1	0	0	0	0	0	0	0	0	0	3.63918	11.5719	36.9768	4		0	0	1	0	0	0
1273	15	6	23	0	0	0	0	0	0	1	0	0	0	0	0	0	0	0	0	0	0	3.89507	12.5067	38.8167	4		0	0	1	0	0	0
1274	15	6	23	0	0	0	0	0	0	0	1	0	0	0	0	0	0	0	0	0	0	3.82631	10.6025	34.8485	4		0	0	1	0	0	0
1275	15	6	23	0	0	0	0	0	0	0	0	1	0	0	0	0	0	0	0	0	0	3.73342	13.2997	32.7232	4		0	0	1	0	0	0
1276	16	7	24	0	0	0	0	0	0	1	0	0	0	0	0	0	0	0	0	0	0	2.99233	10.8358	35.724	4		0	0	1	0	0	0
1277	16	7	24	0	0	0	0	0	0	0	1	0	0	0	0	0	0	0	0	0	0	3.46098	12.7283	34.1816	4		0	0	1	0	0	0
1278	16	7	24	0	0	0	0	0	0	0	0	1	0	0	0	0	0	0	0	0	0	3.7952	14.0054	36.3028	4		0	0	1	0	0	0
1279	16	7	24	0	0	0	0	0	0	1	0	0	0	0	0	0	0	0	0	0	0	4.57826	11.8176	30.127	4		0	0	1	0	0	0
1280	16	7	24	0	0	0	0	0	0	0	1	0	0	0	0	0	0	0	0	0	0	3.48011	13.2513	33.379	4		0	0	1	0	0	0
1281	16	7	24	0	0	0	0	0	0	0	0	1	0	0	0	0	0	0	0	0	0	3.994	10.5458	31.1057	4		0	0	1	0	0	0
1282	10	4	15	0	0	0	0	0	0	1	0	0	0	0	0	0	0	0	0	0	0	3.44187	12.9721	38.8126	4		0	0	1	0	0	0
1283	10	4	15	0	0	0	0	0	0	0	1	0	0	0	0	0	0	0	0	0	0	3.45296	11.7272	38.4296	4		0	0	1	0	0	0
1284	10	4	15	0	0	0	0	0	0	0	0	1	0	0	0	0	0	0	0	0	0	4.3155	11.8333	34.971	4		0	0	1	0	0	0
1285	12	6	19	0	0	0	0	0	0	1	0	0	0	0	0	0	0	0	0	0	0	3.34848	11.3576	36.2974	4		0	0	1	0	0	0
1286	12	6	19	0	0	0	0	0	0	0	1	0	0	0	0	0	0	0	0	0	0	4.17753	10.583	30.329	4		0	0	1	0	0	0
1287	12	6	19	0	0	0	0	0	0	0	0	1	0	0	0	0	0	0	0	0	0	3.58583	13.1456	36.0219	4		0	0	1	0	0	0
1288	6	5	12	0	0	0	0	0	0	1	0	0	0	0	0	0	0	0	0	0	0	3.43134	11.9493	34.9951	4		0	0	1	0	0	0
1289	6	5	12	0	0	0	0	0	0	0	1	0	0	0	0	0	0	0	0	0	0	4.53659	10.0872	37.7574	4		0	0	1	0	0	0
1290	6	5	12	0	0	0	0	0	0	0	0	1	0	0	0	0	0	0	0	0	0	4.04937	13.8977	38.8191	4		0	0	1	0	0	0
1291	8	6	15	0	0	0	0	0	0	1	0	0	0	0	0	0	0	0	0	0	0	3.07231	11.8646	37.7379	4		0	0	1	0	0	0
1292	8	6	15	0	0	0	0	0	0	0	1	0	0	0	0	0	0	0	0	0	0	3.69272	12.6209	34.4878	4		0	0	1	0	0	0
1293	8	6	15	0	0	0	0	0	0	0	0	1	0	0	0	0	0	0	0	0	0	4.50661	12.0657	36.7734	4		0	0	1	0	0	0
1294	10	6	18	0	0	0	0	0	0	2	0	0	0	0	0	0	0	0	0	0	0	3.88928	13.6079	35.6694	4		0	0	2	0	0	0
1295	10	6	18	0	0	0	0	0	0	0	2	0	0	0	0	0	0	0	0	0	0	4.10504	13.7631	33.3634	4		0	0	2	0	0	0
1296	10	6	18	0	0	0	0	0	0	0	0	2	0	0	0	0	0	0	0	0	0	2.78167	14.2879	33.8495	4		0	0	2	0	0	0
1297	10	6	18	0	0	0	0	0	0	2	0	0	0	0	0	0	0	0	0	0	0	4.08106	12.0298	36.5384	4		0	0	2	0	0	0
1298	10	6	18	0	0	0	0	0	0	0	2	0	0	0	0	0	0	0	0	0	0	4.10313	11.6519	34.643	4		0	0	2	0	0	0
1299	10	6	18	0	0	0	0	0	0	0	0	2	0	0	0	0	0	0	0	0	0	3.99292	12.1971	33.7456	4		0	0	2	0	0	0
1300	10	6	18	0	0	0	0	0	0	2	0	0	0	0	0	0	0	0	0	0	0	2.69371	13.8371	30.5637	4		0	0	2	0	0	0
1301	10	6	18	0	0	0	0	0	0	0	2	0	0	0	0	0	0	0	0	0	0	3.16005	13.4186	35.1736	4		0	0	2	0	0	0
1302	10	6	18	0	0	0	0	0	0	0	0	2	0	0	0	0	0	0	0	0	0	4.33475	11.8481	38.2489	4		0	0	2	0	0	0
1303	12	6	21	0	0	0	0	0	0	3	0	0	0	0	0	0	0	0	0	0	0	4.13255	13.6456	36.2683	4		0	0	3	0	0	0
1304	12	6	21	0	0	0	0	0	0	0	3	0	0	0	0	0	0	0	0	0	0	4.11597	13.4733	34.9212	4		0	0	3	0	0	0
1305	12	6	21	0	0	0	0	0	0	0	0	3	0	0	0	0	0	0	0	0	0	3.25333	13.1846	38.9535	4		0	0	3	0	0	0
1306	20	7	29	0	0	0	0	0	0	1	1	0	0	0	0	0	0	0	0	0	0	3.68182	12.9406	39.5253	4		0	0	2	0	0	0
1307	20	7	29	0	0	0	0	0	0	1	0	1	0	0	0	0	0	0	0	0	0	3.31546	11.4812	38.812	4		0	0	2	0	0	0
1308	20	7	29	0	0	0	0	0	0	0	1	1	0	0	0	0	0	0	0	0	0	3.22037	11.9943	36.5134	4		0	0	2	0	0	0
1309	24	10	36	0	0	0	0	0	0	1	1	0	0	0	0	0	0	0	0	0	0	2.79555	14.1099	32.2234	4		0	0	2	0	0	0
1310	24	10	36	0	0	0	0	0	0	1	0	1	0	0	0	0	0	0	0	0	0	3.30336	11.7827	35.1529	4		0	0	2	0	0	0
1311	24	10	36	0	0	0	0	0	0	0	1	1	0	0	0	0	0	0	0	0	0	4.1548	11.8802	32.3309	4		0	0	2	0	0	0
1312	22	10	34	0	0	0	0	0	0	1	1	0	0	0	0	0	0	0	0	0	0	3.76619	12.8927	35.361	4		0	0	2	0	0	0
1313	22	10	34	0	0	0	0	0	0	1	0	1	0	0	0	0	0	0	0	0	0	4.41558	10.9819	32.7618	4		0	0	2	0	0	0
1314	22	10	34	0	0	0	0	0	0	0	1	1	0	0	0	0	0	0	0	0	0	3.57638	14.841	37.2197	4		0	0	2	0	0	0
1315	18	7	27	0	0	0	0	0	0	2	0	0	0	0	0	0	0	0	0	0	0	3.89065	14.1547	35.0769	4		0	0	2	0	0	0
1316	18	7	27	0	0	0	0	0	0	0	2	0	0	0	0	0	0	0	0	0	0	3.42388	12.7352	34.3899	4		0	0	2	0	0	0
1317	18	7	27	0	0	0	0	0	0	0	0	2	0	0	0	0	0	0	0	0	0	3.91127	14.5088	35.2654	4		0	0	2	0	0	0
1318	18	7	27	0	0	0	0	0	0	1	1	0	0	0	0	0	0	0	0	0	0	3.00717	14.7289	36.101	4		0	0	2	0	0	0
1319	18	7	27	0	0	0	0	0	0	1	0	1	0	0	0	0	0	0	0	0	0	4.94044	13.6312	33.3681	4		0	0	2	0	0	0
1320	18	7	27	0	0	0	0	0	0	0	1	1	0	0	0	0	0	0	0	0	0	3.43476	14.0181	37.3686	4		0	0	2	0	0	0
1321	16	11	29	0	0	0	0	0	0	2	0	0	0	0	0	0	0	0	0	0	0	3.55842	14.7784	36.2424	4		0	0	2	0	0	0
1322	16	11	29	0	0	0	0	0	0	0	2	0	0	0	0	0	0	0	0	0	0	3.57008	13.9181	34.4407	4		0	0	2	0	0	0
1323	16	11	29	0	0	0	0	0	0	0	0	2	0	0	0	0	0	0	0	0	0	4.12439	11.3171	35.2997	4		0	0	2	0	0	0
1324	16	11	29	0	0	0	0	0	0	1	1	0	0	0	0	0	0	0	0	0	0	3.95981	11.5551	35.3946	4		0	0	2	0	0	0
1325	16	11	29	0	0	0	0	0	0	1	0	1	0	0	0	0	0	0	0	0	0	3.46984	12.4956	30.8706	4		0	0	2	0	0	0
1326	16	11	29	0	0	0	0	0	0	0	1	1	0	0	0	0	0	0	0	0	0	3.10411	12.4801	36.544	4		0	0	2	0	0	0
1327	14	10	26	0	0	0	0	0	0	2	0	0	0	0	0	0	0	0	0	0	0	4.28824	12.9245	39.3306	4		0	0	2	0	0	0
1328	14	10	26	0	0	0	0	0	0	0	2	0	0	0	0	0	0	0	0	0	0	3.47594	14.4853	35.1781	4		0	0	2	0	0	0
1329	14	10	26	0	0	0	0	0	0	0	0	2	0	0	0	0	0	0	0	0	0	4.0958	11.5903	36.8156	4		0	0	2	0	0	0
1330	17	6	25	0	0	0	0	0	0	1	0	0	0	0	0	0	0	0	0	0	0	4.32483	12.4195	33.0322	4		0	0	1	0	0	0
1331	17	6	25	0	0	0	0	0	0	0	1	0	0	0	0	0	0	0	0	0	0	4.39658	13.0701	37.3869	4		0	0	1	0	0	0
1332	17	6	25	0	0	0	0	0	0	0	0	1	0	0	0	0	0	0	0	0	0	3.83366	14.8028	37.0153	4		0	0	1	0	0	0
1333	19	7	28	0	0	0	0	0	0	1	0	0	0	0	0	0	0	0	0	0	0	4.87869	10.3987	33.5472	4		0	0	1	0	0	0
1334	19	7	28	0	0	0	0	0	0	0	1	0	0	0	0	0	0	0	0	0	0	4.01678	14.8969	37.0352	4		0	0	1	0	0	0
1335	19	7	28	0	0	0	0	0	0	0	0	1	0	0	0	0	0	0	0	0	0	3.49802	12.5298	37.9636	4		0	0	1	0	0	0
1336	21	8	31	0	0	0	0	0	0	1	0	0	0	0	0	0	0	0	0	0	0	4.11693	11.4001	32.8591	4		0	0	1	0	0	0
1337	21	8	31	0	0	0	0	0	0	0	1	0	0	0	0	0	0	0	0	0	0	3.36831	11.4927	33.2783	4		0	0	1	0	0	0
1338	21	8	31	0	0	0	0	0	0	0	0	1	0	0	0	0	0	0	0	0	0	4.22843	14.42	35.2491	4		0	0	1	0	0	0
1339	11	4	17	0	0	0	0	0	0	1	0	0	0	0	0	0	0	0	0	0	0	2.86898	13.5131	35.9826	4		0	0	1	0	0	0
1340	11	4	17	0	0	0	0	0	0	0	1	0	0	0	0	0	0	0	0	0	0	3.15544	10.8605	34.6257	4		0	0	1	0	0	0
1341	11	4	17	0	0	0	0	0	0	0	0	1	0	0	0	0	0	0	0	0	0	4.07726	14.5994	38.7777	4		0	0	1	0	0	0
1342	15	6	23	0	0	0	0	0	0	1	0	0	0	0	0	0	0	0	0	0	0	3.59837	14.0279	33.6486	4		0	0	1	0	0	0
1343	15	6	23	0	0	0	0	0	0	0	1	0	0	0	0	0	0	0	0	0	0	3.69581	12.1955	33.061	4		0	0	1	0	0	0
1344	15	6	23	0	0	0	0	0	0	0	0	1	0	0	0	0	0	0	0	0	0	4.25049	11.9985	35.4083	4		0	0	1	0	0	0
1345	9	3	13	0	0	0	1	0	0	0	0	0	0	0	0	0	0	0	0	0	0	3.62118	14.3793	33.556	4		0	1	0	0	0	0
1346	9	3	13	0	0	0	0	1	0	0	0	0	0	0	0	0	0	0	0	0	0	4.55347	12.2172	35.9363	4		0	1	0	0	0	0
1347	9	3	13	0	0	0	0	0	1	0	0	0	0	0	0	0	0	0	0	0	0	2.94638	13.3066	34.6212	4		0	1	0	0	0	0
1348	7	2	10	0	0	0	1	0	0	0	0	0	0	0	0	0	0	0	0	0	0	3.45317	12.184	32.827	4		0	1	0	0	0	0
1349	7	2	10	0	0	0	0	1	0	0	0	0	0	0	0	0	0	0	0	0	0	3.92207	11.6043	36.6249	4		0	1	0	0	0	0
1350	7	2	10	0	0	0	0	0	1	0	0	0	0	0	0	0	0	0	0	0	0	4.90213	11.7588	31.6122	4		0	1	0	0	0	0
1351	5	1	7	0	0	0	1	0	0	0	0	0	0	0	0	0	0	0	0	0	0	2.87993	12.8636	31.221	4		0	1	0	0	0	0
1352	5	1	7	0	0	0	0	1	0	0	0	0	0	0	0	0	0	0	0	0	0	3.10982	13.3234	37.281	4		0	1	0	0	0	0
1353	5	1	7	0	0	0	0	0	1	0	0	0	0	0	0	0	0	0	0	0	0	4.32904	13.953	33.6217	4		0	1	0	0	0	0
1354	15	6	22	0	0	0	1	0	0	0	0	0	0	0	0	0	0	0	0	0	0	4.45737	12.5834	36.1455	4		0	1	0	0	0	0
1355	15	6	22	0	0	0	0	1	0	0	0	0	0	0	0	0	0	0	0	0	0	3.67628	14.3665	32.1197	4		0	1	0	0	0	0
1356	15	6	22	0	0	0	0	0	1	0	0	0	0	0	0	0	0	0	0	0	0	3.91331	10.273	34.1595	4		0	1	0	0	0	0
1357	11	4	16	0	0	0	1	0	0	0	0	0	0	0	0	0	0	0	0	0	0	3.49857	11.0548	30.2534	4		0	1	0	0	0	0
1358	11	4	16	0	0	0	0	1	0	0	0	0	0	0	0	0	0	0	0	0	0	3.48557	10.6091	39.5163	4		0	1	0	0	0	0
1359	11	4	16	0	0	0	0	0	1	0	0	0	0	0	0	0	0	0	0	0	0	3.09646	12.44	34.1155	4		0	1	0	0	0	0
1360	7	2	10	0	0	0	1	0	0	0	0	0	0	0	0	0	0	0	0	0	0	4.53089	14.4012	32.1622	4		0	1	0	0	0	0
1361	7	2	10	0	0	0	0	1	0	0	0	0	0	0	0	0	0	0	0	0	0	3.77871	12.6112	31.0585	4		0	1	0	0	0	0
1362	7	2	10	0	0	0	0	0	1	0	0	0	0	0	0	0	0	0	0	0	0	3.8254	13.4851	39.2112	4		0	1	0	0	0	0
1363	21	10	32	0	0	0	1	0	0	0	0	0	0	0	0	0	0	0	0	0	0	3.54741	11.6367	32.8199	4		0	1	0	0	0	0
1364	21	10	32	0	0	0	0	1	0	0	0	0	0	0	0	0	0	0	0	0	0	3.74781	12.0666	31.9513	4		0	1	0	0	0	0
1365	21	10	32	0	0	0	0	0	1	0	0	0	0	0	0	0	0	0	0	0	0	3.36649	12.8695	37.7442	4		0	1	0	0	0	0
1366	11	5	17	0	0	0	1	0	0	0	0	0	0	0	0	0	0	0	0	0	0	3.26363	10.6163	39.4889	4		0	1	0	0	0	0
1367	11	5	17	0	0	0	0	1	0	0	0	0	0	0	0	0	0	0	0	0	0	2.85205	10.442	32.1637	4		0	1	0	0	0	0
1368	11	5	17	0	0	0	0	0	1	0	0	0	0	0	0	0	0	0	0	0	0	3.08598	12.724	38.6477	4		0	1	0	0	0	0
1369	11	10	22	0	0	0	1	0	0	0	0	0	0	0	0	0	0	0	0	0	0	4.19742	14.1987	30.001	4		0	1	0	0	0	0
1370	11	10	22	0	0	0	0	1	0	0	0	0	0	0	0	0	0	0	0	0	0	3.64112	10.4477	36.2498	4		0	1	0	0	0	0
1371	11	10	22	0	0	0	0	0	1	0	0	0	0	0	0	0	0	0	0	0	0	3.94022	11.939	35.6607	4		0	1	0	0	0	0
1372	15	18	34	0	0	0	1	0	0	0	0	0	0	0	0	0	0	0	0	0	0	4.7402	13.2391	37.556	4		0	1	0	0	0	0
1373	15	18	34	0	0	0	0	1	0	0	0	0	0	0	0	0	0	0	0	0	0	4.47691	13.5356	35.1474	4		0	1	0	0	0	0
1374	15	18	34	0	0	0	0	0	1	0	0	0	0	0	0	0	0	0	0	0	0	3.88495	11.5645	36.5438	4		0	1	0	0	0	0
1375	13	10	27	0	0	0	1	0	0	0	0	0	0	0	0	0	0	0	0	0	0	4.10105	13.8773	35.2195	4		0	1	0	0	0	0
1376	13	10	27	0	0	0	0	1	0	0	0	0	0	0	0	0	0	0	0	0	0	3.78326	11.5067	32.778	4		0	1	0	0	0	0
1377	13	10	27	0	0	0	0	0	1	0	0	0	0	0	0	0	0	0	0	0	0	4.32921	11.3297	34.1311	4		0	1	0	0	0	0
1378	22	8	34	0	0	0	2	0	0	0	0	0	0	0	0	0	0	0	0	0	0	3.89973	14.0812	35.1227	4		0	2	0	0	0	0
1379	22	8	34	0	0	0	1	1	0	0	0	0	0	0	0	0	0	0	0	0	0	3.61079	12.6995	34.4396	4		0	2	0	0	0	0
1380	22	8	34	0	0	0	1	0	1	0	0	0	0	0	0	0	0	0	0	0	0	3.45625	12.19	32.8618	4		0	2	0	0	0	0
1381	22	8	34	0	0	0	0	2	0	0	0	0	0	0	0	0	0	0	0	0	0	3.91412	11.6835	33.6016	4		0	2	0	0	0	0
1382	22	8	34	0	0	0	0	1	1	0	0	0	0	0	0	0	0	0	0	0	0	3.4363	13.8763	38.6033	4		0	2	0	0	0	0
1383	22	8	34	0	0	0	0	0	2	0	0	0	0	0	0	0	0	0	0	0	0	3.65862	13.5436	36.8452	4		0	2	0	0	0	0
1384	5	5	11	0	0	0	1	0	0	0	0	0	0	0	0	0	0	0	0	0	0	4.05044	13.9597	37.965	4		0	1	0	0	0	0
1385	5	5	11	0	0	0	0	1	0	0	0	0	0	0	0	0	0	0	0	0	0	3.40187	12.1139	32.6703	4		0	1	0	0	0	0
1386	5	5	11	0	0	0	0	0	1	0	0	0	0	0	0	0	0	0	0	0	0	2.9931	14.0113	36.4885	4		0	1	0	0	0	0
1387	9	6	22	0	0	0	1	0	0	0	0	0	0	0	0	0	0	0	0	0	0	3.65637	14.9007	39.1749	4		0	1	0	0	0	0
1388	9	6	22	0	0	0	0	1	0	0	0	0	0	0	0	0	0	0	0	0	0	4.58569	13.4354	38.2051	4		0	1	0	0	0	0
1389	9	6	22	0	0	0	0	0	1	0	0	0	0	0	0	0	0	0	0	0	0	2.82239	11.6677	38.7094	4		0	1	0	0	0	0
1390	11	10	26	0	0	0	1	0	0	0	0	0	0	0	0	0	0	0	0	0	0	3.05499	11.8314	33.64	4		0	1	0	0	0	0
1391	11	10	26	0	0	0	0	1	0	0	0	0	0	0	0	0	0	0	0	0	0	3.95175	10.8806	35.7046	4		0	1	0	0	0	0
1392	11	10	26	0	0	0	0	0	1	0	0	0	0	0	0	0	0	0	0	0	0	3.00911	12.9453	36.7148	4		0	1	0	0	0	0
1393	13	7	21	0	0	0	1	0	0	0	0	0	0	0	0	0	0	0	0	0	0	3.36952	13.3686	35.8993	4		0	1	0	0	0	0
1394	13	7	21	0	0	0	0	1	0	0	0	0	0	0	0	0	0	0	0	0	0	3.32624	12.8924	30.6578	4		0	1	0	0	0	0
1395	13	7	21	0	0	0	0	0	1	0	0	0	0	0	0	0	0	0	0	0	0	3.53742	12.3316	33.3673	4		0	1	0	0	0	0
1396	11	6	18	0	0	0	1	0	0	0	0	0	0	0	0	0	0	0	0	0	0	2.6784	13.352	38.9228	4		0	1	0	0	0	0
1397	11	6	18	0	0	0	0	1	0	0	0	0	0	0	0	0	0	0	0	0	0	3.76684	11.6122	36.5145	4		0	1	0	0	0	0
1398	11	6	18	0	0	0	0	0	1	0	0	0	0	0	0	0	0	0	0	0	0	4.26725	13.1101	33.6975	4		0	1	0	0	0	0
1399	7	5	13	0	0	0	1	0	0	0	0	0	0	0	0	0	0	0	0	0	0	4.14697	11.1186	34.8	4		0	1	0	0	0	0
1400	7	5	13	0	0	0	0	1	0	0	0	0	0	0	0	0	0	0	0	0	0	3.3049	13.1405	36.5229	4		0	1	0	0	0	0
1401	7	5	13	0	0	0	0	0	1	0	0	0	0	0	0	0	0	0	0	0	0	3.4551	13.6285	38.0633	4		0	1	0	0	0	0
1402	13	6	20	0	0	0	1	0	0	0	0	0	0	0	0	0	0	0	0	0	0	4.55572	13.8756	39.4834	4		0	1	0	0	0	0
1403	13	6	20	0	0	0	0	1	0	0	0	0	0	0	0	0	0	0	0	0	0	4.60058	10.6256	38.019	4		0	1	0	0	0	0
1404	13	6	20	0	0	0	0	0	1	0	0	0	0	0	0	0	0	0	0	0	0	4.36007	10.4965	34.0613	4		0	1	0	0	0	0
1405	15	9	25	0	0	0	1	0	0	0	0	0	0	0	0	0	0	0	0	0	0	3.73646	12.9855	35.4229	4		0	1	0	0	0	0
1406	15	9	25	0	0	0	0	1	0	0	0	0	0	0	0	0	0	0	0	0	0	3.50456	11.1335	34.763	4		0	1	0	0	0	0
1407	15	9	25	0	0	0	0	0	1	0	0	0	0	0	0	0	0	0	0	0	0	3.89022	14.1749	35.457	4		0	1	0	0	0	0
1408	7	6	14	0	0	0	1	0	0	0	0	0	0	0	0	0	0	0	0	0	0	3.27537	10.6775	34.0083	4		0	1	0	0	0	0
1409	7	6	14	0	0	0	0	1	0	0	0	0	0	0	0	0	0	0	0	0	0	3.44607	10.7089	39.4212	4		0	1	0	0	0	0
1410	7	6	14	0	0	0	0	0	1	0	0	0	0	0	0	0	0	0	0	0	0	4.62196	10.4987	31.031	4		0	1	0	0	0	0
1411	9	6	18	0	0	0	1	0	0	0	0	0	0	0	0	0	0	0	0	0	0	4.99679	10.048	31.8049	4		0	1	0	0	0	0
1412	9	6	18	0	0	0	0	1	0	0	0	0	0	0	0	0	0	0	0	0	0	4.2947	12.1111	38.3646	4		0	1	0	0	0	0
1413	9	6	18	0	0	0	0	0	1	0	0	0	0	0	0	0	0	0	0	0	0	3.83069	13.1069	34.8925	4		0	1	0	0	0	0
1414	11	5	19	0	0	0	1	0	0	0	0	0	0	0	0	0	0	0	0	0	0	2.98047	10.9228	32.8452	4		0	1	0	0	0	0
1415	11	5	19	0	0	0	0	1	0	0	0	0	0	0	0	0	0	0	0	0	0	4.43205	11.587	37.8406	4		0	1	0	0	0	0
1416	11	5	19	0	0	0	0	0	1	0	0	0	0	0	0	0	0	0	0	0	0	3.41939	10.8113	31.071	4		0	1	0	0	0	0
1417	15	7	25	0	0	0	1	0	0	0	0	0	0	0	0	0	0	0	0	0	0	3.69146	11.793	30.5338	4		0	1	0	0	0	0
1418	15	7	25	0	0	0	0	1	0	0	0	0	0	0	0	0	0	0	0	0	0	4.08712	12.0346	37.5988	4		0	1	0	0	0	0
1419	15	7	25	0	0	0	0	0	1	0	0	0	0	0	0	0	0	0	0	0	0	3.30833	12.0903	37.6843	4		0	1	0	0	0	0
1420	14	5	21	0	0	0	1	0	0	0	0	0	0	0	0	0	0	0	0	0	0	4.361	13.3615	38.1154	4		0	1	0	0	0	0
1421	14	5	21	0	0	0	0	1	0	0	0	0	0	0	0	0	0	0	0	0	0	4.23053	12.6904	30.6778	4		0	1	0	0	0	0
1422	14	5	21	0	0	0	0	0	1	0	0	0	0	0	0	0	0	0	0	0	0	4.24461	12.1638	30.9959	4		0	1	0	0	0	0
1423	16	6	24	0	0	0	1	0	0	0	0	0	0	0	0	0	0	0	0	0	0	3.59328	13.7564	35.3657	4		0	1	0	0	0	0
1424	16	6	24	0	0	0	0	1	0	0	0	0	0	0	0	0	0	0	0	0	0	3.19364	11.0389	37.8182	4		0	1	0	0	0	0
1425	16	6	24	0	0	0	0	0	1	0	0	0	0	0	0	0	0	0	0	0	0	4.43744	14.8221	34.3962	4		0	1	0	0	0	0
1426	18	7	27	0	0	0	1	0	0	0	0	0	0	0	0	0	0	0	0	0	0	3.17461	10.0911	35.2111	4		0	1	0	0	0	0
1427	18	7	27	0	0	0	0	1	0	0	0	0	0	0	0	0	0	0	0	0	0	4.31579	13.4081	36.6439	4		0	1	0	0	0	0
1428	18	7	27	0	0	0	0	0	1	0	0	0	0	0	0	0	0	0	0	0	0	3.11472	10.1026	36.522	4		0	1	0	0	0	0
1429	16	7	25	0	0	0	1	0	0	0	0	0	0	0	0	0	0	0	0	0	0	3.53184	12.9627	37.7551	4		0	1	0	0	0	0
1430	16	7	25	0	0	0	0	1	0	0	0	0	0	0	0	0	0	0	0	0	0	4.17904	11.7692	35.5528	4		0	1	0	0	0	0
1431	16	7	25	0	0	0	0	0	1	0	0	0	0	0	0	0	0	0	0	0	0	4.17031	13.446	34.6673	4		0	1	0	0	0	0
1432	15	6	24	0	0	0	1	0	0	0	0	0	0	0	0	0	0	0	0	0	0	3.97442	12.3065	36.2252	4		0	1	0	0	0	0
1433	15	6	24	0	0	0	0	1	0	0	0	0	0	0	0	0	0	0	0	0	0	3.29592	14.655	36.5021	4		0	1	0	0	0	0
1434	15	6	24	0	0	0	0	0	1	0	0	0	0	0	0	0	0	0	0	0	0	3.77843	14.4163	32.9262	4		0	1	0	0	0	0
1435	15	7	25	0	0	0	1	0	0	0	0	0	0	0	0	0	0	0	0	0	0	3.53978	14.2482	37.0199	4		0	1	0	0	0	0
1436	15	7	25	0	0	0	0	1	0	0	0	0	0	0	0	0	0	0	0	0	0	3.16341	13.4783	34.9332	4		0	1	0	0	0	0
1437	15	7	25	0	0	0	0	0	1	0	0	0	0	0	0	0	0	0	0	0	0	4.62556	14.3847	38.2819	4		0	1	0	0	0	0
1438	12	6	20	0	0	0	1	0	0	0	0	0	0	0	0	0	0	0	0	0	0	2.94323	14.7253	32.9543	4		0	1	0	0	0	0
1439	12	6	20	0	0	0	0	1	0	0	0	0	0	0	0	0	0	0	0	0	0	4.79588	10.7208	35.8634	4		0	1	0	0	0	0
1440	12	6	20	0	0	0	0	0	1	0	0	0	0	0	0	0	0	0	0	0	0	4.13717	12.6863	38.1789	4		0	1	0	0	0	0
1441	13	7	23	0	0	0	1	0	0	0	0	0	0	0	0	0	0	0	0	0	0	3.34368	11.2336	32.1737	4		0	1	0	0	0	0
1442	13	7	23	0	0	0	0	1	0	0	0	0	0	0	0	0	0	0	0	0	0	3.81879	10.7118	35.5685	4		0	1	0	0	0	0
1443	13	7	23	0	0	0	0	0	1	0	0	0	0	0	0	0	0	0	0	0	0	3.17187	12.9934	33.3302	4		0	1	0	0	0	0
1444	14	10	26	0	0	0	2	0	0	0	0	0	0	0	0	0	0	0	0	0	0	3.42574	11.1011	38.2857	4		0	2	0	0	0	0
1445	14	10	26	0	0	0	1	1	0	0	0	0	0	0	0	0	0	0	0	0	0	4.06715	12.4487	36.0153	4		0	2	0	0	0	0
1446	14	10	26	0	0	0	1	0	1	0	0	0	0	0	0	0	0	0	0	0	0	3.81224	13.9484	36.9151	4		0	2	0	0	0	0
1447	14	10	26	0	0	0	0	2	0	0	0	0	0	0	0	0	0	0	0	0	0	4.27022	12.339	33.375	4		0	2	0	0	0	0
1448	14	10	26	0	0	0	0	1	1	0	0	0	0	0	0	0	0	0	0	0	0	3.97346	11.6055	38.8558	4		0	2	0	0	0	0
1449	14	10	26	0	0	0	0	0	2	0	0	0	0	0	0	0	0	0	0	0	0	3.66206	11.8312	39.1544	4		0	2	0	0	0	0
1450	10	10	22	0	0	0	2	0	0	0	0	0	0	0	0	0	0	0	0	0	0	3.81836	13.7641	36.6974	4		0	2	0	0	0	0
1451	10	10	22	0	0	0	0	2	0	0	0	0	0	0	0	0	0	0	0	0	0	3.87608	12.7211	31.5536	4		0	2	0	0	0	0
1452	10	10	22	0	0	0	0	0	2	0	0	0	0	0	0	0	0	0	0	0	0	3.01242	13.2773	33.7314	4		0	2	0	0	0	0
1453	18	8	28	0	0	0	2	0	0	0	0	0	0	0	0	0	0	0	0	0	0	3.78297	12.7601	34.8979	4		0	2	0	0	0	0
1454	18	8	28	0	0	0	0	2	0	0	0	0	0	0	0	0	0	0	0	0	0	3.50781	13.1114	35.8037	4		0	2	0	0	0	0
1455	18	8	28	0	0	0	0	0	2	0	0	0	0	0	0	0	0	0	0	0	0	3.4944	11.57	31.5686	4		0	2	0	0	0	0
1456	14	9	25	0	0	0	2	0	0	0	0	0	0	0	0	0	0	0	0	0	0	4.00056	12.4812	37.469	4		0	2	0	0	0	0
1457	14	9	25	0	0	0	1	1	0	0	0	0	0	0	0	0	0	0	0	0	0	4.07767	13.3959	38.8917	4		0	2	0	0	0	0
1458	14	9	25	0	0	0	1	0	1	0	0	0	0	0	0	0	0	0	0	0	0	3.13698	10.3073	31.165	4		0	2	0	0	0	0
1459	14	9	25	0	0	0	0	2	0	0	0	0	0	0	0	0	0	0	0	0	0	4.41554	10.968	35.3663	4		0	2	0	0	0	0
1460	14	9	25	0	0	0	0	1	1	0	0	0	0	0	0	0	0	0	0	0	0	3.47672	12.0003	34.7716	4		0	2	0	0	0	0
1461	14	9	25	0	0	0	0	0	2	0	0	0	0	0	0	0	0	0	0	0	0	3.63178	13.6738	33.4947	4		0	2	0	0	0	0
1462	23	9	35	0	0	0	3	0	0	0	0	0	0	0	0	0	0	0	0	0	0	2.88502	12.8886	35.3169	4		0	3	0	0	0	0
1463	23	9	35	0	0	0	2	1	0	0	0	0	0	0	0	0	0	0	0	0	0	3.78346	12.5784	33.5606	4		0	3	0	0	0	0
1464	23	9	35	0	0	0	2	0	1	0	0	0	0	0	0	0	0	0	0	0	0	3.73671	11.2266	30.7739	4		0	3	0	0	0	0
1465	23	9	35	0	0	0	0	3	0	0	0	0	0	0	0	0	0	0	0	0	0	3.56385	11.8312	39.6925	4		0	3	0	0	0	0
1466	23	9	35	0	0	0	0	2	1	0	0	0	0	0	0	0	0	0	0	0	0	3.61276	13.9802	38.6575	4		0	3	0	0	0	0
1467	23	9	35	0	0	0	0	0	3	0	0	0	0	0	0	0	0	0	0	0	0	3.53252	12.6584	36.6815	4		0	3	0	0	0	0
1468	12	7	21	0	0	0	2	0	0	0	0	0	0	0	0	0	0	0	0	0	0	4.27025	14.3161	33.0734	4		0	2	0	0	0	0
1469	12	7	21	0	0	0	1	1	0	0	0	0	0	0	0	0	0	0	0	0	0	2.77187	12.2174	38.7445	4		0	2	0	0	0	0
1470	12	7	21	0	0	0	1	0	1	0	0	0	0	0	0	0	0	0	0	0	0	3.2544	14.4317	34.3801	4		0	2	0	0	0	0
1471	12	7	21	0	0	0	0	2	0	0	0	0	0	0	0	0	0	0	0	0	0	3.79329	12.2435	35.6102	4		0	2	0	0	0	0
1472	12	7	21	0	0	0	0	1	1	0	0	0	0	0	0	0	0	0	0	0	0	4.04163	11.6782	37.619	4		0	2	0	0	0	0
1473	12	7	21	0	0	0	0	0	2	0	0	0	0	0	0	0	0	0	0	0	0	3.45544	13.5486	38.1362	4		0	2	0	0	0	0
1474	6	2	9	1	0	0	0	0	0	0	0	0	0	0	0	0	0	0	0	0	0	3.40231	13.206	37.4531	4		1	0	0	0	0	0
1475	6	2	9	0	1	0	0	0	0	0	0	0	0	0	0	0	0	0	0	0	0	4.70485	12.0395	34.0662	4		1	0	0	0	0	0
1476	6	2	9	0	0	1	0	0	0	0	0	0	0	0	0	0	0	0	0	0	0	2.65176	11.0963	37.9295	4		1	0	0	0	0	0
1477	12	5	18	1	0	0	0	0	0	0	0	0	0	0	0	0	0	0	0	0	0	4.2657	10.3379	31.9798	4		1	0	0	0	0	0
1478	12	5	18	0	1	0	0	0	0	0	0	0	0	0	0	0	0	0	0	0	0	3.8947	13.575	32.0195	4		1	0	0	0	0	0
1479	12	5	18	0	0	1	0	0	0	0	0	0	0	0	0	0	0	0	0	0	0	2.94558	13.1769	32.8271	4		1	0	0	0	0	0
1480	14	7	22	1	0	0	0	0	0	0	0	0	0	0	0	0	0	0	0	0	0	3.70111	11.3882	38.856	4		1	0	0	0	0	0
1481	14	7	22	0	1	0	0	0	0	0	0	0	0	0	0	0	0	0	0	0	0	3.59953	13.2771	36.6779	4		1	0	0	0	0	0
1482	14	7	22	0	0	1	0	0	0	0	0	0	0	0	0	0	0	0	0	0	0	3.4429	13.935	33.8562	4		1	0	0	0	0	0
1483	14	7	22	1	0	0	0	0	0	0	0	0	0	0	0	0	0	0	0	0	0	3.86305	12.44	32.1533	4		1	0	0	0	0	0
1484	14	7	22	0	1	0	0	0	0	0	0	0	0	0	0	0	0	0	0	0	0	3.51482	12.0295	36.6957	4		1	0	0	0	0	0
1485	14	7	22	0	0	1	0	0	0	0	0	0	0	0	0	0	0	0	0	0	0	3.40813	14.0956	33.3899	4		1	0	0	0	0	0
1486	14	10	25	1	0	0	0	0	0	0	0	0	0	0	0	0	0	0	0	0	0	4.45723	14.5882	35.5648	4		1	0	0	0	0	0
1487	14	10	25	0	1	0	0	0	0	0	0	0	0	0	0	0	0	0	0	0	0	3.20005	14.0336	30.5799	4		1	0	0	0	0	0
1488	14	10	25	0	0	1	0	0	0	0	0	0	0	0	0	0	0	0	0	0	0	3.89514	12.9472	37.3034	4		1	0	0	0	0	0
1489	8	9	18	1	0	0	0	0	0	0	0	0	0	0	0	0	0	0	0	0	0	3.98375	12.7378	34.169	4		1	0	0	0	0	0
1490	8	9	18	0	1	0	0	0	0	0	0	0	0	0	0	0	0	0	0	0	0	3.93583	11.4808	35.899	4		1	0	0	0	0	0
1491	8	9	18	0	0	1	0	0	0	0	0	0	0	0	0	0	0	0	0	0	0	4.11306	14.2415	39.9092	4		1	0	0	0	0	0
1492	12	7	20	1	0	0	0	0	0	0	0	0	0	0	0	0	0	0	0	0	0	3.93961	13.4354	31.5155	4		1	0	0	0	0	0
1493	12	7	20	0	1	0	0	0	0	0	0	0	0	0	0	0	0	0	0	0	0	4.07075	13.0104	36.8384	4		1	0	0	0	0	0
1494	12	7	20	0	0	1	0	0	0	0	0	0	0	0	0	0	0	0	0	0	0	3.42826	11.2878	31.6862	4		1	0	0	0	0	0
1495	10	12	23	1	0	0	0	0	0	0	0	0	0	0	0	0	0	0	0	0	0	4.45288	13.001	34.6532	4		1	0	0	0	0	0
1496	10	12	23	0	1	0	0	0	0	0	0	0	0	0	0	0	0	0	0	0	0	4.55006	11.2006	38.3778	4		1	0	0	0	0	0
1497	10	12	23	0	0	1	0	0	0	0	0	0	0	0	0	0	0	0	0	0	0	4.09243	10.2824	31.0908	4		1	0	0	0	0	0
1498	12	9	22	1	0	0	0	0	0	0	0	0	0	0	0	0	0	0	0	0	0	3.39941	14.6159	30.1151	4		1	0	0	0	0	0
1499	12	9	22	0	1	0	0	0	0	0	0	0	0	0	0	0	0	0	0	0	0	3.33252	11.2459	33.9644	4		1	0	0	0	0	0
1500	12	9	22	0	0	1	0	0	0	0	0	0	0	0	0	0	0	0	0	0	0	3.70402	10.9541	30.4891	4		1	0	0	0	0	0
1501	14	7	22	1	0	0	0	0	0	0	0	0	0	0	0	0	0	0	0	0	0	4.75135	14.3492	34.4907	4		1	0	0	0	0	0
1502	14	7	22	0	1	0	0	0	0	0	0	0	0	0	0	0	0	0	0	0	0	3.95514	14.6132	34.9026	4		1	0	0	0	0	0
1503	14	7	22	0	0	1	0	0	0	0	0	0	0	0	0	0	0	0	0	0	0	3.7605	14.9434	38.3669	4		1	0	0	0	0	0
1504	10	7	19	2	0	0	0	0	0	0	0	0	0	0	0	0	0	0	0	0	0	3.53796	10.8286	32.1527	4		2	0	0	0	0	0
1505	8	5	15	1	0	0	0	0	0	0	0	0	0	0	0	0	0	0	0	0	0	3.23164	10.6964	32.3756	4		1	0	0	0	0	0
1506	8	5	15	0	1	0	0	0	0	0	0	0	0	0	0	0	0	0	0	0	0	2.87321	12.6342	35.0365	4		1	0	0	0	0	0
1507	8	5	15	0	0	1	0	0	0	0	0	0	0	0	0	0	0	0	0	0	0	3.4755	12.536	31.4727	4		1	0	0	0	0	0
1508	6	3	12	1	0	0	0	0	0	0	0	0	0	0	0	0	0	0	0	0	0	4.23841	14.5916	33.4979	4		1	0	0	0	0	0
1509	6	3	12	0	1	0	0	0	0	0	0	0	0	0	0	0	0	0	0	0	0	4.01488	11.4195	31.6565	4		1	0	0	0	0	0
1510	6	3	12	0	0	1	0	0	0	0	0	0	0	0	0	0	0	0	0	0	0	4.27341	10.9139	37.4766	4		1	0	0	0	0	0
1511	12	5	19	1	0	0	0	0	0	0	0	0	0	0	0	0	0	0	0	0	0	3.69627	13.5413	34.05	4		1	0	0	0	0	0
1512	12	5	19	0	1	0	0	0	0	0	0	0	0	0	0	0	0	0	0	0	0	4.92204	14.4027	38.5317	4		1	0	0	0	0	0
1513	12	5	19	0	0	1	0	0	0	0	0	0	0	0	0	0	0	0	0	0	0	4.6678	10.6404	31.1072	4		1	0	0	0	0	0
1514	8	3	13	1	0	0	0	0	0	0	0	0	0	0	0	0	0	0	0	0	0	4.51305	13.4207	35.0655	4		1	0	0	0	0	0
1515	8	3	13	0	1	0	0	0	0	0	0	0	0	0	0	0	0	0	0	0	0	3.47014	11.8199	38.1676	4		1	0	0	0	0	0
1516	8	3	13	0	0	1	0	0	0	0	0	0	0	0	0	0	0	0	0	0	0	4.32241	13.0517	32.4615	4		1	0	0	0	0	0
1517	10	4	17	1	0	0	0	0	0	0	0	0	0	0	0	0	0	0	0	0	0	4.61735	11.0316	38.125	4		1	0	0	0	0	0
1518	10	4	17	0	1	0	0	0	0	0	0	0	0	0	0	0	0	0	0	0	0	4.43152	10.0901	30.461	4		1	0	0	0	0	0
1519	10	4	17	0	0	1	0	0	0	0	0	0	0	0	0	0	0	0	0	0	0	3.04762	12.0398	30.8423	4		1	0	0	0	0	0
1520	18	7	29	2	0	0	0	0	0	0	0	0	0	0	0	0	0	0	0	0	0	3.2621	10.3836	36.9601	4		2	0	0	0	0	0
1521	18	7	29	1	1	0	0	0	0	0	0	0	0	0	0	0	0	0	0	0	0	4.15273	11.3202	33.1312	4		2	0	0	0	0	0
1522	18	7	29	1	0	1	0	0	0	0	0	0	0	0	0	0	0	0	0	0	0	3.7917	13.3197	33.7697	4		2	0	0	0	0	0
1523	18	7	29	0	2	0	0	0	0	0	0	0	0	0	0	0	0	0	0	0	0	4.24872	13.9915	35.0048	4		2	0	0	0	0	0
1524	18	7	29	0	1	1	0	0	0	0	0	0	0	0	0	0	0	0	0	0	0	4.10626	13.3992	38.3327	4		2	0	0	0	0	0
1525	18	7	29	0	0	2	0	0	0	0	0	0	0	0	0	0	0	0	0	0	0	3.21606	11.1347	37.4829	4		2	0	0	0	0	0
1526	15	6	23	1	0	0	0	0	0	0	0	0	0	0	0	0	0	0	0	0	0	3.62885	12.0914	38.1595	4		1	0	0	0	0	0
1527	15	6	23	0	1	0	0	0	0	0	0	0	0	0	0	0	0	0	0	0	0	4.04497	10.2099	36.1357	4		1	0	0	0	0	0
1528	15	6	23	0	0	1	0	0	0	0	0	0	0	0	0	0	0	0	0	0	0	4.59775	11.3556	39.9986	4		1	0	0	0	0	0
1529	11	4	17	1	0	0	0	0	0	0	0	0	0	0	0	0	0	0	0	0	0	3.17902	14.0175	36.4989	4		1	0	0	0	0	0
1530	11	4	17	0	1	0	0	0	0	0	0	0	0	0	0	0	0	0	0	0	0	4.73729	11.6125	31.322	4		1	0	0	0	0	0
1531	11	4	17	0	0	1	0	0	0	0	0	0	0	0	0	0	0	0	0	0	0	3.88364	11.1835	34.0158	4		1	0	0	0	0	0
1532	11	4	17	1	0	0	0	0	0	0	0	0	0	0	0	0	0	0	0	0	0	3.3842	10.7717	34.4997	4		1	0	0	0	0	0
1533	11	4	17	0	1	0	0	0	0	0	0	0	0	0	0	0	0	0	0	0	0	3.85033	13.6583	38.8652	4		1	0	0	0	0	0
1534	11	4	17	0	0	1	0	0	0	0	0	0	0	0	0	0	0	0	0	0	0	4.32847	11.5008	35.4851	4		1	0	0	0	0	0
1535	11	6	19	1	0	0	0	0	0	0	0	0	0	0	0	0	0	0	0	0	0	3.21372	12.6474	32.1957	4		1	0	0	0	0	0
1536	11	6	19	0	1	0	0	0	0	0	0	0	0	0	0	0	0	0	0	0	0	4.23417	13.8651	34.1528	4		1	0	0	0	0	0
1537	11	6	19	0	0	1	0	0	0	0	0	0	0	0	0	0	0	0	0	0	0	3.05834	13.2784	39.5543	4		1	0	0	0	0	0
1538	13	6	21	1	0	0	0	0	0	0	0	0	0	0	0	0	0	0	0	0	0	4.21874	13.2476	37.2227	4		1	0	0	0	0	0
1539	13	6	21	0	1	0	0	0	0	0	0	0	0	0	0	0	0	0	0	0	0	3.96908	13.0538	37.2135	4		1	0	0	0	0	0
1540	13	6	21	0	0	1	0	0	0	0	0	0	0	0	0	0	0	0	0	0	0	3.54154	10.2269	36.2623	4		1	0	0	0	0	0
1541	22	8	34	2	0	0	0	0	0	0	0	0	0	0	0	0	0	0	0	0	0	4.02266	10.375	34.6624	4		2	0	0	0	0	0
1542	22	8	34	1	1	0	0	0	0	0	0	0	0	0	0	0	0	0	0	0	0	4.54476	12.6513	35.3174	4		2	0	0	0	0	0
1543	22	8	34	1	0	1	0	0	0	0	0	0	0	0	0	0	0	0	0	0	0	4.14243	13.8059	33.7953	4		2	0	0	0	0	0
1544	22	8	34	0	2	0	0	0	0	0	0	0	0	0	0	0	0	0	0	0	0	3.87954	12.8263	34.8524	4		2	0	0	0	0	0
1545	22	8	34	0	1	1	0	0	0	0	0	0	0	0	0	0	0	0	0	0	0	3.48081	14.4561	35.2591	4		2	0	0	0	0	0
1546	22	8	34	0	0	2	0	0	0	0	0	0	0	0	0	0	0	0	0	0	0	3.83956	12.0663	36.2041	4		2	0	0	0	0	0
1547	8	8	19	1	0	0	0	0	0	0	0	0	0	0	0	0	0	0	0	0	0	3.4453	13.3844	39.9734	4		1	0	0	0	0	0
1548	8	8	19	0	1	0	0	0	0	0	0	0	0	0	0	0	0	0	0	0	0	3.49185	12.804	30.2863	4		1	0	0	0	0	0
1549	8	8	19	0	0	1	0	0	0	0	0	0	0	0	0	0	0	0	0	0	0	3.45175	12.4872	38.6191	4		1	0	0	0	0	0
1550	0	2	5	1	0	0	0	0	0	0	0	0	0	0	0	0	0	0	0	0	0	2.86947	13.5585	35.5659	4		1	0	0	0	0	0
1551	0	2	5	0	1	0	0	0	0	0	0	0	0	0	0	0	0	0	0	0	0	4.2105	10.2781	31.1114	4		1	0	0	0	0	0
1552	0	2	5	0	0	1	0	0	0	0	0	0	0	0	0	0	0	0	0	0	0	3.67787	14.2589	33.936	4		1	0	0	0	0	0
1553	0	2	7	1	0	0	0	0	0	0	0	0	0	0	0	0	0	0	0	0	0	3.07812	14.8792	37.9485	4		1	0	0	0	0	0
1554	0	2	7	0	1	0	0	0	0	0	0	0	0	0	0	0	0	0	0	0	0	2.64307	13.1381	38.7163	4		1	0	0	0	0	0
1555	0	2	7	0	0	1	0	0	0	0	0	0	0	0	0	0	0	0	0	0	0	4.18821	12.2592	37.1708	4		1	0	0	0	0	0
1556	9	5	16	1	0	0	0	0	0	0	0	0	0	0	0	0	0	0	0	0	0	4.04004	12.6434	39.6756	4		1	0	0	0	0	0
1557	9	5	16	0	1	0	0	0	0	0	0	0	0	0	0	0	0	0	0	0	0	4.55406	14.2671	30.81	4		1	0	0	0	0	0
1558	9	5	16	0	0	1	0	0	0	0	0	0	0	0	0	0	0	0	0	0	0	3.91839	12.3787	39.7593	4		1	0	0	0	0	0
1559	7	4	14	1	0	0	0	0	0	0	0	0	0	0	0	0	0	0	0	0	0	4.0822	14.6778	36.1041	4		1	0	0	0	0	0
1560	7	4	14	0	1	0	0	0	0	0	0	0	0	0	0	0	0	0	0	0	0	4.322	13.6104	33.8852	4		1	0	0	0	0	0
1561	7	4	14	0	0	1	0	0	0	0	0	0	0	0	0	0	0	0	0	0	0	3.22239	11.9251	36.0234	4		1	0	0	0	0	0
1562	10	4	16	1	0	0	0	0	0	0	0	0	0	0	0	0	0	0	0	0	0	4.02317	11.9088	39.5093	4		1	0	0	0	0	0
1563	10	4	16	0	1	0	0	0	0	0	0	0	0	0	0	0	0	0	0	0	0	3.71655	11.3444	37.2414	4		1	0	0	0	0	0
1564	10	4	16	0	0	1	0	0	0	0	0	0	0	0	0	0	0	0	0	0	0	3.68799	13.8792	31.7013	4		1	0	0	0	0	0
1565	11	6	19	1	0	0	0	0	0	0	0	0	0	0	0	0	0	0	0	0	0	3.78948	11.8545	32.0824	4		1	0	0	0	0	0
1566	11	6	19	0	1	0	0	0	0	0	0	0	0	0	0	0	0	0	0	0	0	4.99966	14.5087	35.871	4		1	0	0	0	0	0
1567	11	6	19	0	0	1	0	0	0	0	0	0	0	0	0	0	0	0	0	0	0	4.24868	11.3269	35.2813	4		1	0	0	0	0	0
1568	12	9	23	1	0	0	0	0	0	0	0	0	0	0	0	0	0	0	0	0	0	3.30683	11.9866	30.4315	4		1	0	0	0	0	0
1569	12	9	23	0	1	0	0	0	0	0	0	0	0	0	0	0	0	0	0	0	0	3.63469	13.7297	39.7236	4		1	0	0	0	0	0
1570	12	9	23	0	0	1	0	0	0	0	0	0	0	0	0	0	0	0	0	0	0	4.35979	13.1254	38.3148	4		1	0	0	0	0	0
1571	12	6	19	1	0	0	0	0	0	0	0	0	0	0	0	0	0	0	0	0	0	4.58624	14.5576	33.0123	4		1	0	0	0	0	0
1572	12	6	19	0	1	0	0	0	0	0	0	0	0	0	0	0	0	0	0	0	0	3.86289	14.3187	32.0804	4		1	0	0	0	0	0
1573	12	6	19	0	0	1	0	0	0	0	0	0	0	0	0	0	0	0	0	0	0	3.62049	12.2056	30.4069	4		1	0	0	0	0	0
1574	8	5	16	1	0	0	0	0	0	0	0	0	0	0	0	0	0	0	0	0	0	3.06449	11.2452	37.4542	4		1	0	0	0	0	0
1575	8	5	16	0	1	0	0	0	0	0	0	0	0	0	0	0	0	0	0	0	0	3.41692	10.6531	35.2132	4		1	0	0	0	0	0
1576	8	5	16	0	0	1	0	0	0	0	0	0	0	0	0	0	0	0	0	0	0	4.11439	14.1418	37.8346	4		1	0	0	0	0	0
1577	6	5	12	1	0	0	0	0	0	0	0	0	0	0	0	0	0	0	0	0	0	3.25402	14.5832	37.3419	4		1	0	0	0	0	0
1578	6	5	12	0	1	0	0	0	0	0	0	0	0	0	0	0	0	0	0	0	0	3.05517	13.0565	38.5392	4		1	0	0	0	0	0
1579	6	5	12	0	0	1	0	0	0	0	0	0	0	0	0	0	0	0	0	0	0	2.84202	12.2697	34.7049	4		1	0	0	0	0	0
1580	10	10	21	1	0	0	0	0	0	0	0	0	0	0	0	0	0	0	0	0	0	3.86294	13.6014	38.5335	4		1	0	0	0	0	0
1581	10	10	21	0	1	0	0	0	0	0	0	0	0	0	0	0	0	0	0	0	0	3.62197	11.406	39.9897	4		1	0	0	0	0	0
1582	10	10	21	0	0	1	0	0	0	0	0	0	0	0	0	0	0	0	0	0	0	3.4998	11.5667	31.7082	4		1	0	0	0	0	0
1583	12	6	20	2	0	0	0	0	0	0	0	0	0	0	0	0	0	0	0	0	0	3.92783	14.7419	33.4899	4		2	0	0	0	0	0
1584	12	6	20	1	1	0	0	0	0	0	0	0	0	0	0	0	0	0	0	0	0	2.8574	14.7881	34.1621	4		2	0	0	0	0	0
1585	12	6	20	1	0	1	0	0	0	0	0	0	0	0	0	0	0	0	0	0	0	3.57648	10.8409	39.2762	4		2	0	0	0	0	0
1586	12	6	20	0	2	0	0	0	0	0	0	0	0	0	0	0	0	0	0	0	0	3.63392	12.4376	35.9857	4		2	0	0	0	0	0
1587	12	6	20	0	1	1	0	0	0	0	0	0	0	0	0	0	0	0	0	0	0	3.97846	12.5347	39.8264	4		2	0	0	0	0	0
1588	12	6	20	0	0	2	0	0	0	0	0	0	0	0	0	0	0	0	0	0	0	4.07335	10.9508	33.7345	4		2	0	0	0	0	0
1589	10	6	18	2	0	0	0	0	0	0	0	0	0	0	0	0	0	0	0	0	0	3.70828	11.862	36.4723	4		2	0	0	0	0	0
1590	10	6	18	0	2	0	0	0	0	0	0	0	0	0	0	0	0	0	0	0	0	3.93828	10.011	36.2879	4		2	0	0	0	0	0
1591	10	6	18	0	0	2	0	0	0	0	0	0	0	0	0	0	0	0	0	0	0	4.53395	13.6946	32.44	4		2	0	0	0	0	0
1592	12	5	19	2	0	0	0	0	0	0	0	0	0	0	0	0	0	0	0	0	0	4.13649	14.3661	38.0917	4		2	0	0	0	0	0
1593	12	5	19	1	1	0	0	0	0	0	0	0	0	0	0	0	0	0	0	0	0	3.97164	13.7838	35.4702	4		2	0	0	0	0	0
1594	12	5	19	1	0	1	0	0	0	0	0	0	0	0	0	0	0	0	0	0	0	3.86384	13.8606	32.3765	4		2	0	0	0	0	0
1595	12	5	19	0	2	0	0	0	0	0	0	0	0	0	0	0	0	0	0	0	0	3.71544	13.5202	30.5145	4		2	0	0	0	0	0
1596	12	5	19	0	1	1	0	0	0	0	0	0	0	0	0	0	0	0	0	0	0	4.52717	12.0522	30.1642	4		2	0	0	0	0	0
1597	12	5	19	0	0	2	0	0	0	0	0	0	0	0	0	0	0	0	0	0	0	3.14218	13.5568	34.6771	4		2	0	0	0	0	0
				Number of HAs of the given element																	Relative r²SCAN-3c energy [kcal/mol]
	# 1H Nuclei	# 13C Nuclei	# Atoms	Zn	Cd	Hg	Ga	In	Tl	Ge	Sn	Pb	As	Sb	Bi	Se	Te	Cl	Br	I	0	1	2	3	Σ structures
Sum	64436	38740																							6388
Average	10.087	6.0645	18.9743																		0	3.76911	12.6404	35.1606	4
Min	0	1	3	0	0	0	0	0	0	0	0	0	0	0	0	0	0	0	0	0	0	2.59044	10.011	30.0006	4
Max	27	24	46	2	2	2	3	3	3	3	3	3	5	5	5	3	3	9	9	9	0	4.99966	14.9944	39.9986	4
Included in # structures				308	304	304	288	288	288	592	592	592	424	424	424	816	788	888	776	808
Included in # structures				868			804			1680			1260			1440		2264

## Sheet: Reference tests
Method dependence of the reference ΔSOδ (Table 2)
13C	σ, PBE0, SR					σ, PBE0, SO					PBE0, ΔSOσ									PBE0, ΔSOδ, relative to TMS										13C	σ, TZ2P, SR						σ, TZ2P, SO						TZ2P, ΔSOσ
Molecule	DZ	DZP	TZP	TZ2P	QZ4P	DZ	DZP	TZP	TZ2P	QZ4P	DZ	DZP	TZP	TZ2P	QZ4P	DZ-TZ2P	DZP-TZ2P	TZP-TZ2P	QZ4P-TZ2P	DZ	DZP	TZP	TZ2P	QZ4P	DZ-TZ2P	DZP-TZ2P	TZP-TZ2P	QZ4P-TZ2P		Molecule	PBE	BLYP	mPW	PBE0	B3LYP	mPW1PW	PBE	BLYP	mPW	PBE0	B3LYP	mPW1PW	PBE	BLYP	mPW	PBE0	B3LYP	mPW1PW	PBE-PBE0
Cl1	179.044	166.577	156.839	156.556	150.911	182.281	169.688	159.947	159.642	153.947	3.237	3.111	3.108	3.086	3.036	0.151	0.025	0.022	-0.05	-2.273	-2.199	-2.243	-2.216	-2.25475	-0.057	0.017	-0.027	-0.03875		Cl1	151.955	146.326	150.432	156.556	150.529	155.33	155.076	149.638	153.579	159.642	153.798	158.439	3.121	3.312	3.147	3.086	3.269	3.109	0.035
Cl3	90.186	80.097	79.545	79.164	71.048	106.937	95.612	95.006	94.218	86.298	16.751	15.515	15.461	15.054	15.25	1.697	0.461	0.407	0.196	-15.787	-14.603	-14.596	-14.184	-14.4688	-1.603	-0.419	-0.412	-0.28475		Cl3	67.042	59.16	65.012	79.164	69.479	77.614	82.54	75.53	80.712	94.218	85.429	92.831	15.498	16.37	15.7	15.054	15.95	15.217	0.444
Br1	188.119	173.444	165.04	165.158	159.752	200.193	184.928	176.799	176.838	171.428	12.074	11.484	11.759	11.68	11.676	0.394	-0.196	0.079	-0.004	-11.11	-10.572	-10.894	-10.81	-10.8948	-0.3	0.238	-0.084	-0.08475		Br1	161.03	155.541	159.364	165.158	159.331	163.829	172.865	168.36	171.333	176.838	171.971	175.638	11.835	12.819	11.969	11.68	12.64	11.809	0.155
Br3	99.199	77.133	78.419	78.177	71.602	187.104	160.146	162.919	160.13	154.44	87.905	83.013	84.5	81.953	82.838	5.952	1.06	2.547	0.885	-86.941	-82.101	-83.635	-81.083	-82.0567	-5.858	-1.018	-2.552	-0.97375		Br3	63.875	54.921	61.433	78.177	66.943	76.301	149.019	145.507	147.798	160.13	154.591	159.268	85.144	90.586	86.365	81.953	87.648	82.967	3.191
I1	207.214	194.132	183.153	184.163	179.431	234.932	221.373	209.772	211.459	206.428	27.718	27.241	26.619	27.296	26.997	0.422	-0.055	-0.677	-0.299	-26.754	-26.329	-25.754	-26.426	-26.2157	-0.328	0.097	0.672	0.21025		I1	180.478	175.622	178.728	184.163	179.085	182.792	207.691	205.281	206.225	211.459	208.729	210.388	27.213	29.659	27.497	27.296	29.644	27.596	-0.083
I3	141.307	129.533	109.338	112.787	106.115	379.563	361.387	336.876	337.581	330.271	238.256	231.854	227.538	224.794	224.156	13.462	7.06	2.744	-0.638	-237.292	-230.942	-226.673	-223.924	-223.375	-13.368	-7.018	-2.749	0.54925		I3	94.184	85.674	91.781	112.787	101.249	110.953	326.618	329.378	326.139	337.581	338.417	337.596	232.434	243.704	234.358	224.794	237.168	226.643	7.64
Se	193.389	181.461	171.481	171.78	166.417	203.349	191.17	181.238	181.489	176.213	9.9595	9.709	9.7575	9.709	9.7955	0.2505	0	0.0485	0.0865	-8.9955	-8.797	-8.8925	-8.839	-9.01425	-0.1565	0.042	-0.0535	-0.17525		Se	166.213	160.27	164.884	171.78	165.227	170.669	175.897	170.712	174.659	181.489	175.66	180.472	9.684	10.4415	9.7745	9.709	10.433	9.803	-0.025
Te	206.815	195.686	186.119	186.275	181.424	230.312	218.898	208.69	209.285	204.398	23.498	23.2115	22.571	23.0095	22.973	0.4885	0.202	-0.4385	-0.0365	-22.534	-22.2995	-21.706	-22.1395	-22.1917	-0.3945	-0.16	0.4335	-0.05225		Te	180.886	175.411	179.435	186.275	180.257	185.088	203.827	200.228	202.524	209.285	205.07	208.281	22.9415	24.8175	23.09	23.0095	24.8125	23.1935	-0.068
As	190.754	181.048	171.637	171.924	166.803	195.153	185.299	175.824	176.12	170.959	4.39867	4.25033	4.187	4.196	4.15633	0.202667	0.0543333	-0.009	-0.0396667	-3.43467	-3.33833	-3.322	-3.326	-3.37508	-0.108667	-0.0123333	0.004	-0.0490833		As	166.265	160.264	165.293	171.924	165.151	171.053	170.409	164.559	169.461	176.12	169.486	175.271	4.14433	4.295	4.16867	4.196	4.335	4.218	-0.0516667
Sb	200.111	191.615	182.576	182.516	177.554	208.485	199.971	190.61	190.544	185.573	8.374	8.356	8.034	8.02767	8.01933	0.346333	0.328333	0.00633333	-0.00833333	-7.41	-7.444	-7.169	-7.15767	-7.23808	-0.252333	-0.286333	-0.0113333	-0.0804167		Sb	176.978	171.323	175.861	182.516	176.141	181.549	185.025	179.616	183.917	190.544	184.411	189.585	8.047	8.29267	8.056	8.02767	8.27	8.036	0.0193333
Bi	198.433	190.221	181.937	181.647	176.75	211.623	203.402	194.286	193.732	188.546	13.1897	13.181	12.3493	12.085	11.7963	1.10467	1.096	0.264333	-0.288667	-12.2257	-12.269	-11.4843	-11.215	-11.0151	-1.01067	-1.054	-0.269333	0.199917		Bi	176.105	170.511	174.92	181.647	175.344	180.633	189.059	183.397	187.609	193.732	187.483	192.478	12.9543	12.8863	12.6893	12.085	12.139	11.845	0.869333
Ge	203.811	195.607	188.335	189.142	184.163	205.648	197.339	189.962	190.77	185.739	1.837	1.73125	1.6265	1.628	1.57675	0.209	0.10325	-0.0015	-0.05125	-0.873	-0.81925	-0.7615	-0.758	-0.7955	-0.115	-0.06125	-0.0035	-0.0375		Ge	184.193	179.014	182.862	189.142	183.371	188.046	185.903	180.741	184.562	190.77	185.031	189.667	1.7105	1.727	1.70075	1.628	1.66025	1.621	0.0825
Sn	212.214	205.093	196.869	197.644	193.281	214.751	207.584	199.124	199.954	195.533	2.53775	2.49175	2.2545	2.3105	2.252	0.22725	0.18125	-0.056	-0.0585	-1.57375	-1.57975	-1.3895	-1.4405	-1.47075	-0.13325	-0.13925	0.051	-0.03025		Sn	192.648	187.887	191.087	197.644	192.335	196.41	195.276	190.528	193.662	199.954	194.73	198.68	2.628	2.641	2.575	2.3105	2.39475	2.27075	0.3175
Pb	203.967	196.774	188.868	189.519	185.009	207.993	200.693	192.321	192.988	188.418	4.02575	3.91925	3.454	3.46925	3.40975	0.5565	0.45	-0.01525	-0.0595	-3.06175	-3.00725	-2.589	-2.59925	-2.6285	-0.4625	-0.408	0.01025	-0.02925		Pb	183.573	178.86	181.894	189.519	184.043	188.202	187.672	182.827	185.718	192.988	187.581	191.467	4.099	3.96775	3.824	3.46925	3.538	3.2655	0.62975
Ga	200.061	192.099	188.705	189.126	184.226	199.495	191.54	187.919	188.322	183.312	-0.566	-0.559	-0.785667	-0.804	-0.914	0.238	0.245	0.0183333	-0.11	1.53	1.471	1.65067	1.674	1.69525	-0.144	-0.203	-0.0233333	0.02125		Ga	183.099	177.745	181.737	189.126	182.946	188.036	182.418	176.891	181.018	188.322	182.005	187.199	-0.681	-0.854	-0.719667	-0.804	-0.941	-0.837	0.123
In	206.753	201.471	193.095	193.253	189.147	202.687	197.374	188.841	188.959	184.709	-4.06567	-4.097	-4.254	-4.294	-4.438	0.228333	0.197	0.04	-0.144	5.02967	5.009	5.119	5.164	5.21925	-0.134333	-0.155	-0.045	0.05525		In	186.85	181.458	185.37	193.253	187.047	192.087	182.949	176.958	181.341	188.959	182.277	187.685	-3.901	-4.49967	-4.029	-4.294	-4.77033	-4.40233	0.393
Tl	198.584	192.641	183.972	184.263	179.501	181.843	175.949	166.841	166.835	161.199	-16.7407	-16.6913	-17.1313	-17.4283	-18.3027	0.687667	0.737	0.297	-0.874333	17.7047	17.6033	17.9963	18.2983	19.0839	-0.593667	-0.695	-0.302	0.785583		Tl	176.98	171.533	175.438	184.263	177.773	183.041	160.895	153.313	158.865	166.835	158.625	165.195	-16.0853	-18.2197	-16.573	-17.4283	-19.1473	-17.846	1.343
Zn	214.239	208.27	200.167	200.23	194.919	213.266	207.206	199.017	199.073	193.564	-0.973	-1.064	-1.15	-1.156	-1.356	0.183	0.092	0.006	-0.2	1.937	1.976	2.015	2.026	2.13725	-0.089	-0.05	-0.011	0.11125		Zn	194.191	188.761	192.698	200.23	194.096	199.056	193.15	187.531	191.622	199.073	192.779	197.871	-1.041	-1.2295	-1.0765	-1.156	-1.317	-1.1855	0.115
Cd	215.214	209.957	201.508	201.825	196.768	210.218	204.865	196.278	196.54	190.958	-4.996	-5.091	-5.231	-5.2855	-5.8105	0.2895	0.1945	0.0545	-0.525	5.96	6.003	6.096	6.1555	6.59175	-0.1955	-0.1525	-0.0595	0.43625		Cd	195.207	189.658	193.703	201.825	195.49	200.65	190.169	184.027	188.585	196.54	189.685	195.29	-5.038	-5.631	-5.118	-5.2855	-5.8045	-5.361	0.2475
Hg	208.308	201.888	193.063	193.257	187.329	188.316	182.196	172.894	172.862	165.09	-19.9915	-19.6925	-20.1685	-20.396	-22.2385	0.4045	0.7035	0.2275	-1.8425	20.9555	20.6045	21.0335	21.266	23.0197	-0.3105	-0.6615	-0.2325	1.75375		Hg	186.327	181.004	184.804	193.257	187.018	192.058	167.036	159.761	165.212	172.862	164.979	171.385	-19.2915	-21.243	-19.592	-20.396	-22.039	-20.673	1.1045
TMS	208.692	196.851	189.283	189.87	185.034	209.656	197.763	190.148	190.74	185.815	0.964	0.912	0.865	0.87	0.78125	0.094	0.042	-0.005	-0.08875	0	0	0	0	0	0	0	0	0		TMS	185.786	181.06	184.775	189.87	184.639	189.009	186.662	181.932	185.65	190.74	185.505	189.877	0.876	0.872	0.875	0.87	0.866	0.868	0.006
															MD	1.37472	0.646958	0.278212	-0.203088					MD	-1.28072	-0.604958	-0.283212	0.114338																				MD	0.824087
															MAD	1.37472	0.672058	0.397937	0.319838					MAD	1.28072	0.644358	0.400287	0.297937																				MAD	0.846854
1H	σ, PBE0, SR					σ, PBE0, SO					PBE0, ΔSOσ									PBE0, ΔSOδ, relative to TMS										1H	σ, TZ2P, SR						σ, TZ2P, SO						TZ2P, ΔSOσ
Molecule	DZ	DZP	TZP	TZ2P	QZ4P	DZ	DZP	TZP	TZ2P	QZ4P	DZ	DZP	TZP	TZ2P	QZ4P	DZ-TZ2P	DZP-TZ2P	TZP-TZ2P	QZ4P-TZ2P	DZ	DZP	TZP	TZ2P	QZ4P	DZ-TZ2P	DZP-TZ2P	TZP-TZ2P	QZ4P-TZ2P		Molecule	PBE	BLYP	mPW	PBE0	B3LYP	mPW1PW	PBE	BLYP	mPW	PBE0	B3LYP	mPW1PW	PBE	BLYP	mPW	PBE0	B3LYP	mPW1PW	PBE-PBE0
Cl1	29.895	28.5683	28.759	28.5443	28.1543	29.959	28.623	28.818	28.604	28.2093	0.064	0.0546667	0.059	0.0596667	0.055	0.00433333	-0.005	-0.000666667	-0.00466667	-0.065	-0.0546667	-0.058	-0.0576667	-0.066	-0.00733333	0.003	-0.000333333	-0.00833333		Cl1	28.409	28.522	28.505	28.5443	28.5983	28.615	28.469	28.584	28.5663	28.604	28.6597	28.6757	0.06	0.062	0.0613333	0.0596667	0.0613333	0.0606667	0.000333333
Cl3	26.87	25.271	24.416	24.086	23.376	26.958	25.359	24.537	24.206	23.501	0.088	0.088	0.121	0.12	0.125	-0.032	-0.032	0.001	0.005	-0.089	-0.088	-0.12	-0.118	-0.136	0.029	0.03	-0.002	-0.018		Cl3	23.552	23.715	23.665	24.086	24.112	24.169	23.68	23.844	23.799	24.206	24.232	24.293	0.128	0.129	0.134	0.12	0.12	0.124	0.008
Br1	30.432	28.785	29.029	28.8097	28.4783	30.633	28.97	29.231	29.0107	28.6713	0.201	0.185	0.202	0.201	0.193	0	-0.016	0.001	-0.008	-0.202	-0.185	-0.201	-0.199	-0.204	-0.003	0.014	-0.002	-0.005		Br1	28.692	28.8127	28.784	28.8097	28.873	28.8777	28.904	29.035	29.0027	29.0107	29.0853	29.0827	0.212	0.222333	0.218667	0.201	0.212333	0.205	0.011
Br3	27.086	24.531	23.94	23.466	23.215	27.668	25.128	24.683	24.202	23.937	0.582	0.597	0.743	0.736	0.722	-0.154	-0.139	0.007	-0.014	-0.583	-0.597	-0.742	-0.734	-0.733	0.151	0.137	-0.008	0.001		Br3	22.84	23.003	22.959	23.466	23.471	23.554	23.637	23.81	23.788	24.202	24.219	24.311	0.797	0.807	0.829	0.736	0.748	0.757	0.061
I1	31.25	29.4963	29.677	29.431	29.0843	31.4893	29.7283	29.951	29.6903	29.3363	0.239333	0.232	0.274	0.259333	0.252	-0.02	-0.0273333	0.0146667	-0.00733333	-0.240333	-0.232	-0.273	-0.257333	-0.263	0.017	0.0253333	-0.0156667	-0.00566667		I1	29.35	29.492	29.435	29.431	29.5243	29.494	29.6613	29.821	29.7633	29.6903	29.8103	29.765	0.311333	0.329	0.328333	0.259333	0.286	0.271	0.052
I3	28.131	25.034	25.22	24.165	23.704	30.045	27.267	27.235	26.348	25.905	1.914	2.233	2.015	2.183	2.201	-0.269	0.05	-0.168	0.018	-1.915	-2.233	-2.014	-2.181	-2.212	0.266	-0.052	0.167	-0.031		I3	23.272	23.465	23.41	24.165	24.148	24.263	25.76	25.958	25.966	26.348	26.368	26.491	2.488	2.493	2.556	2.183	2.22	2.228	0.305
Se	31.269	29.7863	29.8352	29.6563	29.4252	31.1927	29.7057	29.7598	29.5843	29.347	-0.0763333	-0.0806667	-0.0753333	-0.072	-0.0781667	-0.00433333	-0.00866667	-0.00333333	-0.00616667	0.0753333	0.0806667	0.0763333	0.074	0.0671667	0.00133333	0.00666667	0.00233333	-0.00683333		Se	29.4875	29.6132	29.587	29.6563	29.7162	29.7295	29.4253	29.5498	29.5273	29.5843	29.6447	29.659	-0.0621667	-0.0633333	-0.0596667	-0.072	-0.0715	-0.0705	0.00983333
Te	31.7942	30.216	30.3098	30.0773	29.8587	31.4118	29.839	29.942	29.7148	29.497	-0.382333	-0.377	-0.367833	-0.3625	-0.361667	-0.0198333	-0.0145	-0.00533333	0.000833333	0.381333	0.377	0.368833	0.3645	0.350667	0.0168333	0.0125	0.00433333	-0.0138333		Te	29.9287	30.066	30.0232	30.0773	30.1543	30.147	29.5997	29.7283	29.701	29.7148	29.789	29.7885	-0.329	-0.337667	-0.322167	-0.3625	-0.365333	-0.3585	0.0335
As	32.0584	30.8687	30.8277	30.6647	30.4898	31.9654	30.7722	30.7331	30.5698	30.3853	-0.093	-0.0964444	-0.0945556	-0.0948889	-0.104444	0.00188889	-0.00155556	0.000333333	-0.00955556	0.092	0.0964444	0.0955556	0.0968889	0.0934444	-0.00488889	-0.000444444	-0.00133333	-0.00344444		As	30.5587	30.7306	30.6522	30.6647	30.7768	30.736	30.4686	30.6393	30.562	30.5698	30.6818	30.6409	-0.0901111	-0.0912222	-0.0902222	-0.0948889	-0.095	-0.0951111	0.00477778
Sb	32.4781	31.1546	31.1944	30.9986	30.8591	32.2189	30.8833	30.9188	30.7281	30.5782	-0.259222	-0.271222	-0.275667	-0.270444	-0.280889	0.0112222	-0.000777778	-0.00522222	-0.0104444	0.258222	0.271222	0.276667	0.272444	0.269889	-0.0142222	-0.00122222	0.00422222	-0.00255556		Sb	30.9134	31.0956	31.0039	30.9986	31.1266	31.0678	30.6431	30.8196	30.7316	30.7281	30.8517	30.796	-0.270333	-0.276	-0.272333	-0.270444	-0.274889	-0.271778	0.000111111
Bi	32.4873	31.1772	31.2131	30.9649	30.8213	31.6667	30.3079	30.3263	30.0802	29.9132	-0.820667	-0.869333	-0.886778	-0.884667	-0.908111	0.064	0.0153333	-0.00211111	-0.0234444	0.819667	0.869333	0.887778	0.886667	0.897111	-0.067	-0.0173333	0.00111111	0.0104444		Bi	30.866	31.0377	30.9552	30.9649	31.0808	31.0322	29.8624	30.0056	29.9413	30.0802	30.153	30.1433	-1.00356	-1.03211	-1.01389	-0.884667	-0.927778	-0.888889	-0.118889
Ge	32.8434	31.4178	31.5839	31.4045	31.2088	32.8032	31.3725	31.5383	31.3585	31.1476	-0.0401667	-0.04525	-0.0455833	-0.046	-0.06125	0.00583333	0.00075	0.000416667	-0.01525	0.0391667	0.04525	0.0465833	0.048	0.05025	-0.00883333	-0.00275	-0.00141667	0.00225		Ge	31.3068	31.4705	31.394	31.4045	31.5135	31.4711	31.259	31.4213	31.346	31.3585	31.466	31.4249	-0.0478333	-0.04925	-0.048	-0.046	-0.0475	-0.0461667	-0.00183333
Sn	33.05	31.6271	31.7452	31.5333	31.3834	32.92	31.481	31.5977	31.3851	31.2194	-0.13	-0.146083	-0.147583	-0.14825	-0.164	0.01825	0.00216667	0.000666667	-0.01575	0.129	0.146083	0.148583	0.15025	0.153	-0.02125	-0.00416667	-0.00166667	0.00275		Sn	31.4535	31.6262	31.5348	31.5333	31.6541	31.5957	31.2926	31.4592	31.3727	31.3851	31.4982	31.4462	-0.160917	-0.167	-0.162083	-0.14825	-0.155917	-0.149583	-0.0126667
Pb	32.6262	31.2304	31.3687	31.1331	30.9777	32.1508	30.7072	30.8387	30.6031	30.4172	-0.475417	-0.523167	-0.53	-0.53	-0.560417	0.0545833	0.00683333	0	-0.0304167	0.474417	0.523167	0.531	0.532	0.549417	-0.0575833	-0.00883333	-0.001	0.0174167		Pb	31.0206	31.1933	31.1001	31.1331	31.2462	31.1933	30.4202	30.5715	30.4962	30.6031	30.6863	30.6618	-0.600333	-0.621833	-0.603833	-0.53	-0.56	-0.531583	-0.0703333
Ga	32.4429	31.3099	31.5637	31.4037	31.1667	32.4123	31.2738	31.528	31.3673	31.1162	-0.0305556	-0.0361111	-0.0356667	-0.0363333	-0.0504444	0.00577778	0.000222222	0.000666667	-0.0141111	0.0295556	0.0361111	0.0366667	0.0383333	0.0394444	-0.00877778	-0.00222222	-0.00166667	0.00111111		Ga	31.262	31.4298	31.3512	31.4037	31.5049	31.4723	31.2179	31.3828	31.306	31.3673	31.4643	31.435	-0.0441111	-0.047	-0.0452222	-0.0363333	-0.0405556	-0.0373333	-0.00777778
In	32.6973	31.4796	31.6087	31.3778	31.2454	32.5618	31.3336	31.4687	31.2316	31.086	-0.135556	-0.146	-0.14	-0.146222	-0.159444	0.0106667	0.000222222	0.00622222	-0.0132222	0.134556	0.146	0.141	0.148222	0.148444	-0.0136667	-0.00222222	-0.00722222	0.000222222		In	31.2453	31.4059	31.3297	31.3778	31.475	31.4424	31.0594	31.2054	31.1401	31.2316	31.3092	31.2942	-0.185889	-0.200444	-0.189556	-0.146222	-0.165778	-0.148222	-0.0396667
Tl	32.2402	30.9743	31.1199	30.9126	30.7348	31.639	30.3307	30.5053	30.2857	30.0496	-0.601222	-0.643667	-0.614556	-0.626889	-0.685222	0.0256667	-0.0167778	0.0123333	-0.0583333	0.600222	0.643667	0.615556	0.628889	0.674222	-0.0286667	0.0147778	-0.0133333	0.0453333		Tl	30.7454	30.8938	30.8314	30.9126	30.9896	30.9778	29.9198	30.0083	29.9962	30.2857	30.2747	30.3449	-0.825667	-0.885444	-0.835222	-0.626889	-0.714889	-0.632889	-0.198778
Zn	33.1237	31.905	32.0843	31.8753	31.7458	33.062	31.8487	32.0403	31.8308	31.6898	-0.0616667	-0.0563333	-0.044	-0.0445	-0.056	-0.0171667	-0.0118333	0.0005	-0.0115	0.0606667	0.0563333	0.045	0.0465	0.045	0.0141667	0.00983333	-0.0015	-0.0015		Zn	31.7207	31.8648	31.8023	31.8753	31.9525	31.9387	31.669	31.8097	31.7497	31.8308	31.9033	31.8935	-0.0516667	-0.0551667	-0.0526667	-0.0445	-0.0491667	-0.0451667	-0.00716667
Cd	33.1197	31.916	32.1343	31.9213	31.7055	32.948	31.7518	32.0028	31.7883	31.5465	-0.171667	-0.164167	-0.1315	-0.133	-0.159	-0.0386667	-0.0311667	0.0015	-0.026	0.170667	0.164167	0.1325	0.135	0.148	0.0356667	0.0291667	-0.0025	0.013		Cd	31.7627	31.902	31.8447	31.9213	31.9935	31.9853	31.604	31.7323	31.6837	31.7883	31.8445	31.8507	-0.158667	-0.169667	-0.161	-0.133	-0.149	-0.134667	-0.0256667
Hg	32.7107	31.456	31.7125	31.4958	31.2958	31.973	30.7318	31.121	30.898	30.6142	-0.737667	-0.724167	-0.5915	-0.597833	-0.681667	-0.139833	-0.126333	0.00633333	-0.0838333	0.736667	0.724167	0.5925	0.599833	0.670667	0.136833	0.124333	-0.00733333	0.0708333		Hg	31.3338	31.502	31.4157	31.4958	31.594	31.5592	30.6348	30.7595	30.7078	30.898	30.9353	30.9562	-0.699	-0.7425	-0.707833	-0.597833	-0.658667	-0.603	-0.101167
TMS	33.126	31.548	31.64	31.458	31.253	33.125	31.548	31.641	31.46	31.242	-0.001	0	0.001	0.002	-0.011	-0.003	-0.002	-0.001	-0.013	0	0	0	0	0	0	0	0	0		TMS	31.384	31.576	31.481	31.458	31.596	31.533	31.385	31.577	31.483	31.46	31.598	31.535	0.001	0.001	0.002	0.002	0.002	0.002	-0.001
															MD	-0.0246306	-0.0177708	-0.00660139	-0.0164097					MD	0.0216306	0.0157708	0.00560139	0.00340972																				MD	-0.00491944
															MAD	0.0448528	0.0253236	0.0118653	0.0187931					MAD	0.0451528	0.0248903	0.0122986	0.0130264																				MAD	0.053475
[truncated: 15 more columns]

## Sheet: SnS51 C
SnS51 Benchmark set for 13C NMR (Figure 8)
						Deviation		Absolute deviation		Squared deviation			# HAs in … bonding sphere
Compound	Atom (C)	δ(DFT,SR)	ΔSOδ (ML)	ΔSOδ (true)		SR	SR+ML	SR	SR+ML	SR	SR+ML		1	2	3	4	Category
2	6	65.394	2.46741	8.95328		-8.95328	-6.48587	8.95328	6.48587	80.1613	42.0665		1	0	0	0	1
	7	40.477	4.11051	3.9157		-3.9157	0.194808	3.9157	0.194808	15.3327	0.03795		0	1	0	0	2
	8	40.539	4.11841	3.92178		-3.92178	0.196632	3.92178	0.196632	15.3803	0.0386642		0	1	0	0	2
	9	65.267	2.46685	8.95935		-8.95935	-6.4925	8.95935	6.4925	80.27	42.1526		1	0	0	0	1
	10	-3.182	0.817026	-3.84668		3.84668	4.66371	3.84668	4.66371	14.797	21.7502		0	0	1	0	3
	11	3.902	0.758989	0.215299		-0.215299	0.54369	0.215299	0.54369	0.0463535	0.295599		0	0	1	0	3
	12	0.906	1.07424	1.02609		-1.02609	0.0481505	1.02609	0.0481505	1.05286	0.00231847		0	0	1	0	3
	13	3.545	0.691759	0.0664503		-0.0664503	0.625309	0.0664503	0.625309	0.00441565	0.391011		0	0	1	0	3
	14	2.632	0.475447	-1.05375		1.05375	1.5292	1.05375	1.5292	1.11039	2.33844		0	0	1	0	3
	15	3.379	0.589054	1.37753		-1.37753	-0.788478	1.37753	0.788478	1.8976	0.621697		0	0	1	0	3
	16	3.598	0.697499	0.0655704		-0.0655704	0.631929	0.0655704	0.631929	0.00429948	0.399334		0	0	1	0	3
	17	3.316	0.572359	1.37744		-1.37744	-0.80508	1.37744	0.80508	1.89734	0.648155		0	0	1	0	3
	18	2.541	0.48956	-1.05156		1.05156	1.54112	1.05156	1.54112	1.10578	2.37505		0	0	1	0	3
	19	-3.298	0.82106	-3.85893		3.85893	4.67999	3.85893	4.67999	14.8913	21.9023		0	0	1	0	3
	20	3.982	0.728475	0.21432		-0.21432	0.514154	0.21432	0.514154	0.0459333	0.264354		0	0	1	0	3
	21	0.978	1.02271	1.02543		-1.02543	-0.00271439	1.02543	0.00271439	1.0515	7.36789e-06		0	0	1	0	3
3	8	57.863	4.75699	11.8409		-11.8409	-7.08393	11.8409	7.08393	140.207	50.182		1	0	0	0	1
	9	4.852	0.610291	0.127017		-0.127017	0.483274	0.127017	0.483274	0.0161333	0.233553		0	0	1	0	3
	10	4.971	1.27763	2.79655		-2.79655	-1.51891	2.79655	1.51891	7.82068	2.3071		0	0	1	0	3
	11	7.532	0.794587	1.3492		-1.3492	-0.554608	1.3492	0.554608	1.82033	0.307591		0	0	1	0	3
	12	3.769	0.999188	-2.73075		2.73075	3.72994	2.73075	3.72994	7.457	13.9124		0	0	1	0	3
	13	7.845	1.05722	0.0216151		-0.0216151	1.03561	0.0216151	1.03561	0.000467214	1.07249		0	0	1	0	3
	14	4.671	0.818281	-2.22846		2.22846	3.04674	2.22846	3.04674	4.96603	9.28263		0	0	1	0	3
	15	5.219	0.635161	0.0705645		-0.0705645	0.564597	0.0705645	0.564597	0.00497935	0.31877		0	0	1	0	3
	16	7.016	1.00229	0.93459		-0.93459	0.0676997	0.93459	0.0676997	0.873459	0.00458325		0	0	1	0	3
	17	17.267	2.99602	0.252391		-0.252391	2.74363	0.252391	2.74363	0.0637013	7.52748		0	0	1	0	3
	18	16.149	2.89906	0.254212		-0.254212	2.64485	0.254212	2.64485	0.0646237	6.99523		0	0	1	0	3
	19	4.796	0.6111	0.116988		-0.116988	0.494111	0.116988	0.494111	0.0136863	0.244146		0	0	1	0	3
	20	5.622	1.39666	2.79902		-2.79902	-1.40236	2.79902	1.40236	7.83451	1.9666		0	0	1	0	3
	21	8.334	1.10044	0.0204192		-0.0204192	1.08002	0.0204192	1.08002	0.000416943	1.16645		0	0	1	0	3
	22	3.138	1.28362	-2.7405		2.7405	4.02412	2.7405	4.02412	7.51035	16.1935		0	0	1	0	3
	23	6.749	0.762286	1.34782		-1.34782	-0.585537	1.34782	0.585537	1.81663	0.342853		0	0	1	0	3
	24	4.49	0.935857	-2.16942		2.16942	3.10528	2.16942	3.10528	4.7064	9.64277		0	0	1	0	3
	25	6.795	0.921258	0.980263		-0.980263	-0.0590051	0.980263	0.0590051	0.960916	0.0034816		0	0	1	0	3
	26	5.015	0.887788	0.0737368		-0.0737368	0.814051	0.0737368	0.814051	0.00543711	0.66268		0	0	1	0	3
	27	55.137	4.88595	11.7861		-11.7861	-6.90015	11.7861	6.90015	138.912	47.6121		1	0	0	0	1
4	2	175.186	31.1665	29.0091		-29.0091	2.15736	29.0091	2.15736	841.53	4.65421		1	0	0	0	1
	3	151.103	2.94643	2.46777		-2.46777	0.478656	2.46777	0.478656	6.0899	0.229112		0	1	0	0	2
	4	134.055	0.580298	2.98		-2.98	-2.3997	2.98	2.3997	8.88039	5.75856		0	0	1	0	3
	6	130.223	0.171512	-0.00663829		0.00663829	0.178151	0.00663829	0.178151	4.40669e-05	0.0317376		0	0	0	1	3
	8	137.695	1.92617	2.53739		-2.53739	-0.611223	2.53739	0.611223	6.43836	0.373593		0	0	1	0	3
	10	150.89	1.50884	1.18739		-1.18739	0.321455	1.18739	0.321455	1.40989	0.103333		0	1	0	0	2
	11	136.995	0.365807	0.298644		-0.298644	0.067163	0.298644	0.067163	0.0891883	0.00451086		0	0	1	0	3
	12	141.081	0.130461	0.116724		-0.116724	0.0137372	0.116724	0.0137372	0.0136244	0.000188711		0	0	0	1	3
	13	129.203	0.148177	0.152259		-0.152259	-0.0040817	0.152259	0.0040817	0.0231827	1.66603e-05		0	0	0	0	3
	15	133.586	0.171431	0.163058		-0.163058	0.00837343	0.163058	0.00837343	0.0265879	7.01143e-05		0	0	0	0	3
	17	129.56	0.141167	0.191847		-0.191847	-0.0506801	0.191847	0.0506801	0.0368055	0.00256847		0	0	0	0	3
	19	150.425	0.189353	0.157488		-0.157488	0.0318653	0.157488	0.0318653	0.0248024	0.0010154		0	0	0	1	3
	20	33.459	0.171512	0.0183684		-0.0183684	0.153144	0.0183684	0.153144	0.000337397	0.0234531		0	0	0	0	3
	22	24.854	0.171512	0.120161		-0.120161	0.0513509	0.120161	0.0513509	0.0144388	0.00263691		0	0	0	0	3
	26	26.033	0.171512	0.180064		-0.180064	-0.00855147	0.180064	0.00855147	0.032423	7.31277e-05		0	0	0	0	3
	30	35.043	0.171512	0.0600945		-0.0600945	0.111418	0.0600945	0.111418	0.00361134	0.0124139		0	0	0	0	3
	32	26.157	0.171512	0.130575		-0.130575	0.0409374	0.130575	0.0409374	0.0170498	0.00167587		0	0	0	0	3
	36	27.649	0.171512	0.0933261		-0.0933261	0.0781862	0.0933261	0.0781862	0.00870977	0.00611308		0	0	0	0	3
	40	132.431	2.21139	-0.588751		0.588751	2.80015	0.588751	2.80015	0.346628	7.84082		0	0	1	0	3
	41	148.621	0.17147	0.0308088		-0.0308088	0.140662	0.0308088	0.140662	0.000949184	0.0197857		0	0	0	1	3
	42	136.246	0.28099	0.248894		-0.248894	0.0320958	0.248894	0.0320958	0.0619482	0.00103014		0	0	0	0	3
	44	134.553	0.171512	0.104227		-0.104227	0.0672852	0.104227	0.0672852	0.0108633	0.0045273		0	0	0	0	3
	46	130.979	0.132249	0.290061		-0.290061	-0.157812	0.290061	0.157812	0.0841356	0.0249048		0	0	0	0	3
	48	153.03	0.16252	-0.0445021		0.0445021	0.207022	0.0445021	0.207022	0.00198044	0.0428582		0	0	0	1	3
	49	41.455	0.16222	0.0782997		-0.0782997	0.0839206	0.0782997	0.0839206	0.00613084	0.00704267		0	0	0	0	3
	51	26.583	0.171512	-0.0517924		0.0517924	0.223305	0.0517924	0.223305	0.00268245	0.049865		0	0	0	0	3
	55	28.502	0.171512	0.162648		-0.162648	0.00886446	0.162648	0.00886446	0.0264543	7.85787e-05		0	0	0	0	3
	59	34.542	0.171512	0.269198		-0.269198	-0.097686	0.269198	0.097686	0.0724678	0.00954256		0	0	0	0	3
	61	26.492	0.171512	0.180862		-0.180862	-0.00934953	0.180862	0.00934953	0.032711	8.74137e-05		0	0	0	0	3
	65	24.815	0.171512	0.527452		-0.527452	-0.355939	0.527452	0.355939	0.278205	0.126693		0	0	0	0	3
	69	174.467	27.0527	29.028		-29.028	-1.97532	29.028	1.97532	842.626	3.90188		1	0	0	0	1
	70	149.986	3.62835	2.45958		-2.45958	1.16876	2.45958	1.16876	6.04956	1.36601		0	1	0	0	2
	71	132.43	0.582764	2.982		-2.982	-2.39923	2.982	2.39923	8.8923	5.75631		0	0	1	0	3
	73	129.909	0.171512	-0.00712706		0.00712706	0.178639	0.00712706	0.178639	5.07949e-05	0.031912		0	0	0	1	3
	75	138.13	2.00647	2.54435		-2.54435	-0.537884	2.54435	0.537884	6.47373	0.289319		0	0	1	0	3
	77	149.326	1.71601	1.19889		-1.19889	0.517126	1.19889	0.517126	1.43733	0.267419		0	1	0	0	2
	78	144.317	0.464809	0.294229		-0.294229	0.17058	0.294229	0.17058	0.0865706	0.0290976		0	0	1	0	3
	79	151.173	0.132816	0.116294		-0.116294	0.0165213	0.116294	0.0165213	0.0135244	0.000272955		0	0	0	1	3
	80	129.613	0.269224	0.152581		-0.152581	0.116643	0.152581	0.116643	0.0232809	0.0136056		0	0	0	0	3
	82	133.395	0.17143	0.162764		-0.162764	0.00866663	0.162764	0.00866663	0.026492	7.51105e-05		0	0	0	0	3
	84	128.857	0.15144	0.191719		-0.191719	-0.0402787	0.191719	0.0402787	0.0367561	0.00162237		0	0	0	0	3
	86	151.553	0.263613	0.156692		-0.156692	0.106921	0.156692	0.106921	0.0245524	0.0114321		0	0	0	1	3
	87	33.053	0.171512	0.019654		-0.019654	0.151858	0.019654	0.151858	0.000386278	0.023061		0	0	0	0	3
	89	27.24	0.171512	0.120141		-0.120141	0.0513714	0.120141	0.0513714	0.0144339	0.00263902		0	0	0	0	3
	93	23.685	0.171512	0.182997		-0.182997	-0.0114848	0.182997	0.0114848	0.0334879	0.0001319		0	0	0	0	3
	97	34.74	0.171512	0.0600345		-0.0600345	0.111478	0.0600345	0.111478	0.00360415	0.0124273		0	0	0	0	3
	99	26.481	0.171512	0.130936		-0.130936	0.0405768	0.130936	0.0405768	0.0171441	0.00164648		0	0	0	0	3
	103	29.253	0.171512	0.0932636		-0.0932636	0.0782487	0.0932636	0.0782487	0.0086981	0.00612286		0	0	0	0	3
	107	125.559	2.20865	-0.584317		0.584317	2.79296	0.584317	2.79296	0.341426	7.80064		0	0	1	0	3
	108	150.145	0.171489	0.031		-0.031	0.140489	0.031	0.140489	0.000961	0.0197373		0	0	0	1	3
	109	135.915	0.331595	0.248705		-0.248705	0.0828892	0.248705	0.0828892	0.0618544	0.00687063		0	0	0	0	3
	111	135.062	0.171512	0.104709		-0.104709	0.0668037	0.104709	0.0668037	0.0109639	0.00446274		0	0	0	0	3
	113	129.912	0.134518	0.289515		-0.289515	-0.154997	0.289515	0.154997	0.0838188	0.0240241		0	0	0	0	3
	115	151.156	0.160535	-0.0420023		0.0420023	0.202537	0.0420023	0.202537	0.0017642	0.0410212		0	0	0	1	3
	116	42.116	0.165456	0.0783705		-0.0783705	0.0870857	0.0783705	0.0870857	0.00614193	0.00758392		0	0	0	0	3
	118	28.079	0.171512	-0.0510522		0.0510522	0.222565	0.0510522	0.222565	0.00260633	0.049535		0	0	0	0	3
	122	30.971	0.171512	0.163181		-0.163181	0.00833151	0.163181	0.00833151	0.026628	6.94141e-05		0	0	0	0	3
	126	35.007	0.171512	0.266726		-0.266726	-0.0952138	0.266726	0.0952138	0.0711428	0.00906566		0	0	0	0	3
	128	24.916	0.171512	0.178453		-0.178453	-0.00694055	0.178453	0.00694055	0.0318454	4.81712e-05		0	0	0	0	3
	132	25.067	0.171512	0.532741		-0.532741	-0.361228	0.532741	0.361228	0.283813	0.130486		0	0	0	0	3
11	1	157.717	1.88297	2.33626		-2.33626	-0.453291	2.33626	0.453291	5.45811	0.205473		1	0	0	0	1
	2	156.591	0.817397	0.166565		-0.166565	0.650831	0.166565	0.650831	0.027744	0.423582		0	1	0	0	2
	4	112.995	1.28493	2.82522		-2.82522	-1.54028	2.82522	1.54028	7.98185	2.37247		0	0	1	0	3
	6	156.658	0.804678	0.163322		-0.163322	0.641356	0.163322	0.641356	0.0266742	0.411338		0	1	0	0	2
	8	157.321	1.86014	2.31954		-2.31954	-0.459395	2.31954	0.459395	5.38025	0.211044		1	0	0	0	1
	9	152.492	3.66854	1.95306		-1.95306	1.71548	1.95306	1.71548	3.81444	2.94288		1	0	0	0	1
	10	148.698	0.84716	0.656855		-0.656855	0.190305	0.656855	0.190305	0.431458	0.036216		0	1	0	0	2
	11	134.986	0.168381	0.383652		-0.383652	-0.215272	0.383652	0.215272	0.147189	0.0463419		0	0	1	0	3
	13	135.331	0.171512	0.128158		-0.128158	0.0433548	0.128158	0.0433548	0.0164244	0.00187964		0	0	0	1	3
	15	130.41	0.132821	0.421167		-0.421167	-0.288346	0.421167	0.288346	0.177382	0.0831435		0	0	1	0	3
	17	143.44	0.815125	0.661149		-0.661149	0.153976	0.661149	0.153976	0.437118	0.0237086		0	1	0	0	2
	19	29.847	0.171511	0.347591		-0.347591	-0.176079	0.347591	0.176079	0.120819	0.031004		0	0	1	0	3
	23	14.094	0.0934143	-0.0584171		0.0584171	0.151831	0.0584171	0.151831	0.00341256	0.0230528		0	0	1	0	3
	25	17.054	0.506827	0.102152		-0.102152	0.404675	0.102152	0.404675	0.010435	0.163762		0	0	0	1	3
	29	19.955	0.5173	0.183401		-0.183401	0.333898	0.183401	0.333898	0.033636	0.111488		0	0	0	1	3
	33	15.629	0.176415	0.264946		-0.264946	-0.0885309	0.264946	0.0885309	0.0701962	0.00783772		0	0	1	0	3
	35	19.666	0.492445	0.195515		-0.195515	0.29693	0.195515	0.29693	0.0382261	0.0881672		0	0	0	1	3
	39	19.754	0.612613	0.0433909		-0.0433909	0.569223	0.0433909	0.569223	0.00188277	0.324014		0	0	0	1	3
	43	19.309	0.137684	0.132401		-0.132401	0.00528382	0.132401	0.00528382	0.0175299	2.79188e-05		0	0	1	0	3
	45	19.991	0.550586	0.0828146		-0.0828146	0.467772	0.0828146	0.467772	0.00685827	0.21881		0	0	0	1	3
	49	21.261	0.691301	0.099789		-0.099789	0.591512	0.099789	0.591512	0.00995784	0.349886		0	0	0	1	3
	53	14.828	0.105967	-0.0230264		0.0230264	0.128993	0.0230264	0.128993	0.000530214	0.0166392		0	0	1	0	3
	55	17.804	0.518658	0.100602		-0.100602	0.418055	0.100602	0.418055	0.0101208	0.17477		0	0	0	1	3
	59	19.7	0.445788	0.149495		-0.149495	0.296293	0.149495	0.296293	0.0223488	0.0877896		0	0	0	1	3
	63	16.158	0.169123	0.241515		-0.241515	-0.072392	0.241515	0.072392	0.0583296	0.0052406		0	0	1	0	3
	65	19.704	0.615089	0.0413257		-0.0413257	0.573764	0.0413257	0.573764	0.00170781	0.329205		0	0	0	1	3
	69	19.775	0.494336	0.191362		-0.191362	0.302974	0.191362	0.302974	0.0366194	0.0917932		0	0	0	1	3
	73	18.31	0.133612	0.134796		-0.134796	-0.0011848	0.134796	0.0011848	0.01817	1.40374e-06		0	0	1	0	3
	75	21.518	0.700634	0.114537		-0.114537	0.586096	0.114537	0.586096	0.0131188	0.343509		0	0	0	1	3
	79	19.64	0.547104	0.0847863		-0.0847863	0.462317	0.0847863	0.462317	0.00718871	0.213737		0	0	0	1	3
16	6	154.215	0.15009	0.81101		-0.81101	-0.66092	0.81101	0.66092	0.657737	0.436815		0	1	0	0	2
	7	133.76	2.75417	0.694411		-0.694411	2.05976	0.694411	2.05976	0.482206	4.24262		0	0	1	0	3
	8	138.191	0.171512	0.162546		-0.162546	0.00896582	0.162546	0.00896582	0.0264213	8.0386e-05		0	0	0	1	3
	10	118.042	0.171498	0.225036		-0.225036	-0.0535377	0.225036	0.0535377	0.050641	0.00286628		0	0	0	0	3
	12	135.211	0.171512	0.14229		-0.14229	0.0292225	0.14229	0.0292225	0.0202464	0.000853957		0	0	0	1	3
	14	132.134	2.00671	0.142779		-0.142779	1.86393	0.142779	1.86393	0.0203858	3.47423		0	0	1	0	3
	15	144.653	3.02029	0.194335		-0.194335	2.82595	0.194335	2.82595	0.037766	7.98602		0	0	0	1	3
	16	147.066	0.171512	0.130459		-0.130459	0.0410534	0.130459	0.0410534	0.0170195	0.00168538		0	0	0	0	3
	17	132.519	2.30613	0.197483		-0.197483	2.10865	0.197483	2.10865	0.0389997	4.4464		0	0	0	0	3
	19	144.498	0.171512	0.138293		-0.138293	0.0332192	0.138293	0.0332192	0.019125	0.00110352		0	0	0	0	3
	20	134.05	2.07271	0.17837		-0.17837	1.89434	0.17837	1.89434	0.031816	3.58853		0	0	0	0	3
	22	145.872	0.17036	0.14916		-0.14916	0.0211994	0.14916	0.0211994	0.0222488	0.000449417		0	0	0	0	3
	23	20.742	0.171512	0.105584		-0.105584	0.065928	0.105584	0.065928	0.011148	0.0043465		0	0	0	0	3
	27	22.733	0.171512	0.130194		-0.130194	0.0413184	0.130194	0.0413184	0.0169505	0.00170721		0	0	0	0	3
	31	23.757	0.171512	0.136333		-0.136333	0.035179	0.136333	0.035179	0.0185868	0.00123756		0	0	0	0	3
	35	140.35	1.50643	0.0258529		-0.0258529	1.48058	0.0258529	1.48058	0.000668371	2.19212		0	0	0	1	3
	36	149.054	0.171512	0.684003		-0.684003	-0.51249	0.684003	0.51249	0.46786	0.262646		0	0	0	0	3
	37	132.658	1.3508	0.191483		-0.191483	1.15931	0.191483	1.15931	0.0366656	1.34401		0	0	0	0	3
	39	149.108	0.171512	0.100649		-0.100649	0.0708636	0.100649	0.0708636	0.0101302	0.00502165		0	0	0	0	3
	40	135.105	1.62526	0.261975		-0.261975	1.36329	0.261975	1.36329	0.0686311	1.85855		0	0	0	0	3
	42	151.562	0.171512	0.125643		-0.125643	0.0458695	0.125643	0.0458695	0.0157861	0.00210402		0	0	0	0	3
	43	24.344	0.171512	0.200061		-0.200061	-0.0285482	0.200061	0.0285482	0.0400242	0.000815002		0	0	0	0	3
	47	22.928	0.171512	0.123319		-0.123319	0.0481938	0.123319	0.0481938	0.0152075	0.00232264		0	0	0	0	3
	51	22.718	0.171512	0.179838		-0.179838	-0.00832565	0.179838	0.00832565	0.0323417	6.93164e-05		0	0	0	0	3
	55	159.706	0.136993	0.806837		-0.806837	-0.669844	0.806837	0.669844	0.650986	0.448692		0	1	0	0	2
	56	130.157	2.03081	0.138879		-0.138879	1.89194	0.138879	1.89194	0.0192874	3.57942		0	0	1	0	3
	57	135.064	0.171512	0.142075		-0.142075	0.029437	0.142075	0.029437	0.0201854	0.000866538		0	0	0	1	3
	59	118.169	0.171508	0.223427		-0.223427	-0.0519186	0.223427	0.0519186	0.0499195	0.00269554		0	0	0	0	3
	61	137.208	0.171512	0.162406		-0.162406	0.00910668	0.162406	0.00910668	0.0263756	8.29316e-05		0	0	0	1	3
	63	138.424	2.06845	0.68491		-0.68491	1.38354	0.68491	1.38354	0.469102	1.91417		0	0	1	0	3
	64	139.042	1.43146	0.0278829		-0.0278829	1.40358	0.0278829	1.40358	0.000777459	1.97003		0	0	0	1	3
	65	147.948	0.171512	0.679863		-0.679863	-0.508351	0.679863	0.508351	0.462214	0.25842		0	0	0	0	3
	66	133.282	1.22234	0.192609		-0.192609	1.02973	0.192609	1.02973	0.0370982	1.06035		0	0	0	0	3
	68	148.084	0.171512	0.10089		-0.10089	0.070622	0.10089	0.070622	0.0101789	0.00498746		0	0	0	0	3
	69	133.901	1.53832	0.262643		-0.262643	1.27568	0.262643	1.27568	0.0689815	1.62736		0	0	0	0	3
	71	151.171	0.171512	0.126857		-0.126857	0.0446554	0.126857	0.0446554	0.0160927	0.00199411		0	0	0	0	3
	72	24.68	0.171512	0.198014		-0.198014	-0.0265016	0.198014	0.0265016	0.0392095	0.000702333		0	0	0	0	3
	76	22.409	0.171512	0.123332		-0.123332	0.0481804	0.123332	0.0481804	0.0152108	0.00232136		0	0	0	0	3
	80	21.885	0.171512	0.1807		-0.1807	-0.00918809	0.1807	0.00918809	0.0326526	8.4421e-05		0	0	0	0	3
	84	148.423	2.91592	0.195655		-0.195655	2.72027	0.195655	2.72027	0.0382807	7.39987		0	0	0	1	3
	85	146.703	0.170402	0.147018		-0.147018	0.0233836	0.147018	0.0233836	0.0216143	0.000546791		0	0	0	0	3
	86	133.29	2.0848	0.178484		-0.178484	1.90632	0.178484	1.90632	0.0318564	3.63404		0	0	0	0	3
	88	145.456	0.171512	0.138124		-0.138124	0.0333885	0.138124	0.0333885	0.0190782	0.00111479		0	0	0	0	3
	89	133.016	2.39415	0.197215		-0.197215	2.19694	0.197215	2.19694	0.0388936	4.82653		0	0	0	0	3
	91	148.621	0.171512	0.133128		-0.133128	0.0383844	0.133128	0.0383844	0.017723	0.00147337		0	0	0	0	3
	92	21.398	0.171512	0.136367		-0.136367	0.0351455	0.136367	0.0351455	0.0185959	0.0012352		0	0	0	0	3
	96	22.822	0.171512	0.130064		-0.130064	0.0414487	0.130064	0.0414487	0.0169166	0.00171799		0	0	0	0	3
	100	18.929	0.171512	0.107759		-0.107759	0.0637534	0.107759	0.0637534	0.011612	0.0040645		0	0	0	0	3
17	3	135.914	0.171512	0.292577		-0.292577	-0.121065	0.292577	0.121065	0.0856014	0.0146567		0	0	1	1	3
	4	133.628	0.171512	0.15618		-0.15618	0.0153319	0.15618	0.0153319	0.0243923	0.000235068		0	0	0	1	3
	7	22.148	0.171512	0.0961878		-0.0961878	0.0753245	0.0961878	0.0753245	0.00925209	0.00567379		0	0	0	1	3
	12	128.666	0.171512	0.174451		-0.174451	-0.00293907	0.174451	0.00293907	0.0304333	8.63815e-06		0	0	0	0	3
	15	168.804	1.12237	1.72521		-1.72521	-0.60284	1.72521	0.60284	2.97635	0.363416		0	1	1	0	2
	17	20.342	0.171512	0.166621		-0.166621	0.00489173	0.166621	0.00489173	0.0277624	2.3929e-05		0	0	0	1	3
	21	132.566	0.171512	0.184339		-0.184339	-0.0128271	0.184339	0.0128271	0.033981	0.000164533		0	0	0	1	3
	23	196.365	4.01827	7.36606		-7.36606	-3.34779	7.36606	3.34779	54.2588	11.2077		1	1	0	0	1
	24	146.088	0.735687	2.31074		-2.31074	-1.57505	2.31074	1.57505	5.3395	2.48078		0	1	1	0	2
	25	129.638	0.171512	0.184419		-0.184419	-0.0129071	0.184419	0.0129071	0.0340105	0.000166594		0	0	0	0	3
	27	157.12	0.986148	0.354531		-0.354531	0.631617	0.354531	0.631617	0.125692	0.39894		0	1	1	0	2
	28	141.968	0.819731	2.59944		-2.59944	-1.77971	2.59944	1.77971	6.7571	3.16737		0	1	1	0	2
	29	156.103	1.28231	0.356054		-0.356054	0.926252	0.356054	0.926252	0.126775	0.857943		0	1	1	0	2
	30	133.782	0.171512	0.10035		-0.10035	0.0711623	0.10035	0.0711623	0.0100701	0.00506408		0	0	0	1	3
	32	167.944	0.947903	1.70771		-1.70771	-0.759803	1.70771	0.759803	2.91626	0.577301		0	1	1	0	2
	34	134.649	0.171512	0.144262		-0.144262	0.0272507	0.144262	0.0272507	0.0208114	0.000742603		0	0	1	1	3
	35	139.459	0.171512	0.111066		-0.111066	0.0604464	0.111066	0.0604464	0.0123356	0.00365377		0	0	1	1	3
	37	143.526	0.778409	2.60047		-2.60047	-1.82207	2.60047	1.82207	6.76247	3.31992		0	1	1	0	2
	38	138.721	0.149284	0.461179		-0.461179	-0.311895	0.461179	0.311895	0.212686	0.0972782		0	0	1	1	3
	40	137.962	0.171298	0.372194		-0.372194	-0.200896	0.372194	0.200896	0.138528	0.0403591		0	0	1	1	3
	42	135.158	0.171512	0.292051		-0.292051	-0.120538	0.292051	0.120538	0.0852936	0.0145295		0	0	1	1	3
	43	166.439	0.970014	1.70055		-1.70055	-0.730532	1.70055	0.730532	2.89185	0.533676		0	1	1	0	2
	45	198.689	5.02623	7.35839		-7.35839	-2.33216	7.35839	2.33216	54.1459	5.43897		1	1	0	0	1
	46	138.457	0.171512	0.172707		-0.172707	-0.00119473	0.172707	0.00119473	0.0298277	1.42737e-06		0	0	1	1	3
	47	169.318	0.97126	1.71938		-1.71938	-0.748121	1.71938	0.748121	2.95627	0.559685		0	1	1	0	2
	49	127.264	0.171512	0.0993407		-0.0993407	0.0721716	0.0993407	0.0721716	0.00986858	0.00520874		0	0	0	1	3
	51	138.825	0.132537	0.461921		-0.461921	-0.329385	0.461921	0.329385	0.213371	0.108494		0	0	1	1	3
	53	157.511	0.654624	0.398109		-0.398109	0.256515	0.398109	0.256515	0.158491	0.0657999		0	1	1	0	2
	54	127.233	0.171512	0.0987929		-0.0987929	0.0727194	0.0987929	0.0727194	0.00976004	0.00528811		0	0	0	1	3
	56	157.327	0.665852	0.398052		-0.398052	0.267801	0.398052	0.267801	0.158445	0.0717171		0	1	1	0	2
	57	139.115	0.171512	0.112278		-0.112278	0.0592344	0.112278	0.0592344	0.0126063	0.00350871		0	0	1	1	3
	58	137.775	0.17145	0.371374		-0.371374	-0.199924	0.371374	0.199924	0.137919	0.0399697		0	0	1	1	3
	60	146.585	0.658935	2.3153		-2.3153	-1.65637	2.3153	1.65637	5.36062	2.74355		0	1	1	0	2
	61	132.256	0.171512	0.209805		-0.209805	-0.0382929	0.209805	0.0382929	0.0440182	0.00146635		0	0	0	1	3
	63	25.453	0.171512	0.114355		-0.114355	0.0571575	0.114355	0.0571575	0.013077	0.00326698		0	0	0	1	3
	67	23.067	0.171512	-0.0119565		0.0119565	0.183469	0.0119565	0.183469	0.000142958	0.0336608		0	0	0	1	3
	71	133.313	0.171512	0.155884		-0.155884	0.015628	0.155884	0.015628	0.0242999	0.000244234		0	0	0	1	3
	73	133.534	0.171512	0.101313		-0.101313	0.0701989	0.101313	0.0701989	0.0102644	0.00492789		0	0	0	1	3
	75	25.842	0.171512	-0.0128106		0.0128106	0.184323	0.0128106	0.184323	0.000164112	0.033975		0	0	0	1	3
	79	134.376	0.171512	0.144476		-0.144476	0.0270363	0.144476	0.0270363	0.0208733	0.000730962		0	0	1	1	3
	80	137.998	0.171512	0.173788		-0.173788	-0.00227559	0.173788	0.00227559	0.0302022	5.17833e-06		0	0	1	1	3
	81	21.491	0.171512	0.0960785		-0.0960785	0.0754338	0.0960785	0.0754338	0.00923108	0.00569026		0	0	0	1	3
	85	133.146	0.171512	0.209986		-0.209986	-0.0384742	0.209986	0.0384742	0.0440943	0.00148026		0	0	0	1	3
	87	130.353	0.171512	0.184609		-0.184609	-0.013097	0.184609	0.013097	0.0340806	0.000171531		0	0	0	0	3
	89	128.788	0.171512	0.174671		-0.174671	-0.00315898	0.174671	0.00315898	0.0305101	9.97918e-06		0	0	0	0	3
	91	24.164	0.171512	0.115494		-0.115494	0.0560185	0.115494	0.0560185	0.0133388	0.00313807		0	0	0	1	3
	95	133.371	0.171512	0.184582		-0.184582	-0.0130695	0.184582	0.0130695	0.0340705	0.000170813		0	0	0	1	3
	97	21.084	0.171512	0.167158		-0.167158	0.00435455	0.167158	0.00435455	0.0279417	1.89621e-05		0	0	0	1	3
19	15	6.79	1.36454	0.129836		-0.129836	1.2347	0.129836	1.2347	0.0168573	1.52449		0	0	1	1	3
	19	7.388	0.344158	0.00138608		-0.00138608	0.342772	0.00138608	0.342772	1.92123e-06	0.117493		0	0	1	1	3
	23	6.703	0.894439	0.274683		-0.274683	0.619756	0.274683	0.619756	0.0754507	0.384098		0	0	1	1	3
	27	5.989	0.83141	0.157552		-0.157552	0.673858	0.157552	0.673858	0.0248226	0.454085		0	0	1	1	3
	31	10.92	0.624465	0.195989		-0.195989	0.428476	0.195989	0.428476	0.0384118	0.183592		0	0	1	1	3
	35	4.158	0.091933	0.0845667		-0.0845667	0.00736634	0.0845667	0.00736634	0.00715153	5.42629e-05		0	0	1	1	3
	39	11.007	0.140352	0.501042		-0.501042	-0.360691	0.501042	0.360691	0.251043	0.130098		0	0	1	1	3
	43	4.479	0.778166	-0.0956718		0.0956718	0.873838	0.0956718	0.873838	0.00915309	0.763593		0	0	1	1	3
	47	9.322	0.107527	0.062624		-0.062624	0.044903	0.062624	0.044903	0.00392176	0.00201628		0	0	1	1	3
	51	5.449	0.315192	0.00700596		-0.00700596	0.308187	0.00700596	0.308187	4.90835e-05	0.0949789		0	0	1	1	3
	55	6.15	0.504116	0.101208		-0.101208	0.402908	0.101208	0.402908	0.0102431	0.162335		0	0	1	1	3
	59	5.787	0.874862	0.0589108		-0.0589108	0.815952	0.0589108	0.815952	0.00347048	0.665777		0	0	1	1	3
	63	6.459	0.134505	0.0894268		-0.0894268	0.045078	0.0894268	0.045078	0.00799716	0.00203202		0	0	1	1	3
	67	5.717	0.990748	-0.0161762		0.0161762	1.00692	0.0161762	1.00692	0.000261671	1.0139		0	0	1	1	3
	71	4.443	0.291232	0.0271486		-0.0271486	0.264084	0.0271486	0.264084	0.000737045	0.0697401		0	0	1	1	3
	75	6.463	0.439325	-0.0852228		0.0852228	0.524547	0.0852228	0.524547	0.00726292	0.27515		0	0	2	0	3
	79	5.918	0.143512	0.0070001		-0.0070001	0.136512	0.0070001	0.136512	4.90014e-05	0.0186354		0	0	2	0	3
	83	16.29	4.232	3.23569		-3.23569	0.996307	3.23569	0.996307	10.4697	0.992628		1	1	0	0	1
	86	7.858	0.963069	0.524533		-0.524533	0.438535	0.524533	0.438535	0.275135	0.192313		0	0	1	1	3
	90	4.801	0.744995	-0.0101216		0.0101216	0.755116	0.0101216	0.755116	0.000102446	0.570201		0	0	1	1	3
	94	7.56	0.134431	0.230957		-0.230957	-0.0965256	0.230957	0.0965256	0.0533412	0.00931719		0	0	1	1	3
	98	6.695	0.429746	-0.703072		0.703072	1.13282	0.703072	1.13282	0.49431	1.28328		0	0	2	0	3
	102	5.444	0.141813	0.22074		-0.22074	-0.0789265	0.22074	0.0789265	0.048726	0.00622939		0	0	2	0	3
	106	11.066	3.61419	3.07133		-3.07133	0.542856	3.07133	0.542856	9.43307	0.294693		1	1	0	0	1
20	3	59.722	-1.04375	-1.30363		1.30363	0.25988	1.30363	0.25988	1.69945	0.0675374		0	1	0	0	2
	4	37.317	0.171513	0.169613		-0.169613	0.00190012	0.169613	0.00190012	0.0287684	3.61047e-06		0	0	1	0	3
	8	35.669	0.172368	0.186186		-0.186186	-0.0138174	0.186186	0.0138174	0.0346652	0.00019092		0	0	1	0	3
	12	35.569	0.171513	0.40228		-0.40228	-0.230767	0.40228	0.230767	0.161829	0.0532536		0	0	1	0	3
	17	59.426	-0.980422	-1.3092		1.3092	0.328779	1.3092	0.328779	1.71401	0.108095		0	1	0	0	2
	18	35.844	0.171514	0.0552858		-0.0552858	0.116228	0.0552858	0.116228	0.00305652	0.0135089		0	0	1	0	3
	22	38.181	0.171512	0.187941		-0.187941	-0.0164293	0.187941	0.0164293	0.035322	0.000269922		0	0	1	0	3
	26	35.58	0.171512	0.357127		-0.357127	-0.185615	0.357127	0.185615	0.12754	0.034453		0	0	1	0	3
	31	61.448	-1.08651	-1.31623		1.31623	0.229713	1.31623	0.229713	1.73245	0.0527681		0	1	0	0	2
	32	37.346	0.171548	0.188174		-0.188174	-0.0166257	0.188174	0.0166257	0.0354095	0.000276415		0	0	1	0	3
	36	35.506	0.171512	0.40899		-0.40899	-0.237478	0.40899	0.237478	0.167273	0.0563958		0	0	1	0	3
	40	38.206	0.171522	0.193527		-0.193527	-0.0220058	0.193527	0.0220058	0.0374528	0.000484253		0	0	1	0	3
	45	60.79	-1.02052	-1.29851		1.29851	0.277987	1.29851	0.277987	1.68613	0.077277		0	1	0	0	2
	46	38.35	0.171513	0.225107		-0.225107	-0.0535941	0.225107	0.0535941	0.0506733	0.00287233		0	0	1	0	3
	50	35.608	0.171512	0.343005		-0.343005	-0.171493	0.343005	0.171493	0.117652	0.0294097		0	0	1	0	3
	54	36.33	0.171606	0.0511911		-0.0511911	0.120415	0.0511911	0.120415	0.00262053	0.0144998		0	0	1	0	3
21	2	132.556	0.173347	0.283941		-0.283941	-0.110594	0.283941	0.110594	0.0806226	0.012231		0	1	0	0	2
	3	10.023	0.21122	0.173973		-0.173973	0.0372467	0.173973	0.0372467	0.0302666	0.00138732		0	0	1	0	3
	7	133.359	0.149962	0.221815		-0.221815	-0.0718531	0.221815	0.0718531	0.0492019	0.00516286		0	1	0	0	2
	8	10.974	0.132744	0.178932		-0.178932	-0.046188	0.178932	0.046188	0.0320168	0.00213334		0	0	1	0	3
	12	121.033	0.758351	-0.844378		0.844378	1.60273	0.844378	1.60273	0.712974	2.56874		1	0	0	0	1
	13	111.129	0.406258	-0.411621		0.411621	0.817879	0.411621	0.817879	0.169431	0.668926		1	0	0	0	1
	14	13.637	0.538848	-0.294415		0.294415	0.833263	0.294415	0.833263	0.0866802	0.694327		0	1	0	0	2
	18	122.448	0.710818	-0.865529		0.865529	1.57635	0.865529	1.57635	0.749141	2.48487		1	0	0	0	1
	19	13.331	1.13265	0.170291		-0.170291	0.962354	0.170291	0.962354	0.0289992	0.926125		0	1	0	0	2
	23	11.411	1.02862	0.167099		-0.167099	0.861517	0.167099	0.861517	0.0279221	0.742211		0	1	0	0	2
	27	174.137	15.859	22.9219		-22.9219	-7.06291	22.9219	7.06291	525.416	49.8847		1	0	0	0	1
	28	152.329	2.89433	1.42643		-1.42643	1.4679	1.42643	1.4679	2.03469	2.15473		0	1	0	0	2
	29	137.53	0.129101	0.145399		-0.145399	-0.0162981	0.145399	0.0162981	0.021141	0.000265629		0	0	1	0	3
	30	151.208	0.167432	0.220425		-0.220425	-0.0529933	0.220425	0.0529933	0.0485873	0.00280829		0	0	0	1	3
	31	128.083	2.45891	0.201998		-0.201998	2.25691	0.201998	2.25691	0.0408033	5.09364		0	0	0	0	3
	33	155.154	0.171512	0.13934		-0.13934	0.0321728	0.13934	0.0321728	0.0194155	0.00103509		0	0	0	0	3
	34	40.61	0.171512	0.0360972		-0.0360972	0.135415	0.0360972	0.135415	0.00130301	0.0183373		0	0	0	0	3
	36	25.382	0.171512	0.0875928		-0.0875928	0.0839195	0.0875928	0.0839195	0.0076725	0.00704249		0	0	0	0	3
	40	26.566	0.171512	0.0855868		-0.0855868	0.0859256	0.0855868	0.0859256	0.00732509	0.00738321		0	0	0	0	3
	44	125.958	2.08524	0.168835		-0.168835	1.9164	0.168835	1.9164	0.0285053	3.6726		0	0	0	0	3
	46	155.137	1.28758	0.173743		-0.173743	1.11384	0.173743	1.11384	0.0301868	1.24064		0	0	0	1	3
	47	34.248	0.171512	0.0788615		-0.0788615	0.0926509	0.0788615	0.0926509	0.00621913	0.00858418		0	0	0	0	3
	49	27.268	0.171512	0.0914895		-0.0914895	0.0800229	0.0914895	0.0800229	0.00837032	0.00640366		0	0	0	0	3
	53	23.238	0.171512	0.100006		-0.100006	0.0715066	0.100006	0.0715066	0.0100011	0.00511319		0	0	0	0	3
	57	36.131	0.171512	0.114657		-0.114657	0.0568555	0.114657	0.0568555	0.0131462	0.00323255		0	0	0	0	3
	59	23.455	0.171512	0.143569		-0.143569	0.0279429	0.143569	0.0279429	0.0206122	0.000780804		0	0	0	0	3
	63	25.674	0.171512	0.113569		-0.113569	0.0579437	0.113569	0.0579437	0.0128978	0.00335747		0	0	0	0	3
	67	132.487	0.969029	1.86195		-1.86195	-0.892918	1.86195	0.892918	3.46685	0.797303		0	0	1	0	3
	69	128.64	0.171512	0.106733		-0.106733	0.0647796	0.106733	0.0647796	0.0113919	0.0041964		0	0	0	1	3
	71	134.647	1.07476	1.85233		-1.85233	-0.777573	1.85233	0.777573	3.43114	0.60462		0	0	1	0	3
	73	150.175	2.85616	1.51035		-1.51035	1.34581	1.51035	1.34581	2.28116	1.81122		0	1	0	0	2
	74	137.322	0.129983	0.252694		-0.252694	-0.122711	0.252694	0.122711	0.0638541	0.015058		0	0	1	0	3
	75	151.183	0.17089	0.22303		-0.22303	-0.0521395	0.22303	0.0521395	0.0497424	0.00271853		0	0	0	1	3
	76	127.967	2.57641	0.196605		-0.196605	2.37981	0.196605	2.37981	0.0386536	5.66349		0	0	0	0	3
	78	155.097	0.171512	0.137816		-0.137816	0.0336961	0.137816	0.0336961	0.0189933	0.00113543		0	0	0	0	3
	79	125.788	2.02419	0.169877		-0.169877	1.85431	0.169877	1.85431	0.0288582	3.43848		0	0	0	0	3
	81	151.244	1.29988	0.192689		-0.192689	1.10719	0.192689	1.10719	0.037129	1.22586		0	0	0	1	3
	82	35.076	0.171512	0.0845408		-0.0845408	0.0869715	0.0845408	0.0869715	0.00714715	0.00756404		0	0	0	0	3
	84	23.029	0.171512	0.10077		-0.10077	0.0707426	0.10077	0.0707426	0.0101545	0.00500452		0	0	0	0	3
	88	27.507	0.171512	0.0874773		-0.0874773	0.084035	0.0874773	0.084035	0.00765228	0.00706188		0	0	0	0	3
	92	41.129	0.171512	0.0357609		-0.0357609	0.135751	0.0357609	0.135751	0.00127884	0.0184285		0	0	0	0	3
	94	27.42	0.171512	0.086143		-0.086143	0.0853694	0.086143	0.0853694	0.00742061	0.00728793		0	0	0	0	3
	98	26.441	0.171512	0.0867852		-0.0867852	0.0847271	0.0867852	0.0847271	0.00753167	0.00717869		0	0	0	0	3
	102	37.654	0.171512	0.101558		-0.101558	0.0699542	0.101558	0.0699542	0.010314	0.00489359		0	0	0	0	3
	104	24.76	0.171512	0.13221		-0.13221	0.0393028	0.13221	0.0393028	0.0174794	0.00154471		0	0	0	0	3
	108	28.481	0.171512	0.109901		-0.109901	0.0616109	0.109901	0.0616109	0.0120783	0.0037959		0	0	0	0	3
23	4	145.694	2.61461	2.78402		-2.78402	-0.169406	2.78402	0.169406	7.75077	0.0286985		1	3	0	0	1
	5	138.586	0.159119	0.683738		-0.683738	-0.524619	0.683738	0.524619	0.467498	0.275225		0	1	3	0	2
	7	135.305	0.170336	0.221578		-0.221578	-0.0512423	0.221578	0.0512423	0.0490969	0.00262578		0	0	1	3	3
	9	138.018	0.171512	0.125127		-0.125127	0.0463852	0.125127	0.0463852	0.0156568	0.00215158		0	0	0	1	3
	11	136.094	0.170933	0.178155		-0.178155	-0.00722186	0.178155	0.00722186	0.0317392	5.21553e-05		0	0	1	3	3
	13	139.508	0.160683	0.657762		-0.657762	-0.497079	0.657762	0.497079	0.432651	0.247088		0	1	3	0	2
24	5	145.479	2.62387	2.48072		-2.48072	0.143144	2.48072	0.143144	6.15398	0.0204903		1	3	0	0	1
	6	138.624	0.13415	0.586058		-0.586058	-0.451908	0.586058	0.451908	0.343464	0.204221		0	1	3	0	2
	8	130.416	0.16633	0.142268		-0.142268	0.0240619	0.142268	0.0240619	0.0202403	0.000578974		0	0	1	3	3
	10	139.047	0.171512	0.122649		-0.122649	0.0488631	0.122649	0.0488631	0.0150428	0.0023876		0	0	0	1	3
	12	140.702	0.171494	0.316595		-0.316595	-0.145101	0.316595	0.145101	0.100233	0.0210543		0	0	1	3	3
	13	135.071	0.171512	0.181803		-0.181803	-0.0102911	0.181803	0.0102911	0.0330525	0.000105906		0	0	0	1	3
	15	132.495	0.171512	0.123075		-0.123075	0.0484377	0.123075	0.0484377	0.0151474	0.00234621		0	0	0	0	3
	17	133.839	0.171512	0.106276		-0.106276	0.0652366	0.106276	0.0652366	0.0112945	0.00425582		0	0	0	1	3
	19	135.204	0.171512	-0.190278		0.190278	0.36179	0.190278	0.36179	0.0362057	0.130892		0	0	1	3	3
	21	140.25	0.824064	0.750563		-0.750563	0.0735011	0.750563	0.0735011	0.563344	0.00540241		0	1	3	0	2
25	4	163.543	0.69683	0.924541		-0.924541	-0.227711	0.924541	0.227711	0.854775	0.0518521		1	0	0	0	1
	5	128.939	0.171512	0.114995		-0.114995	0.0565178	0.114995	0.0565178	0.0132237	0.00319426		0	0	0	1	3
	6	141.019	1.10394	0.682066		-0.682066	0.421878	0.682066	0.421878	0.465214	0.177981		0	1	0	0	2
	7	130.454	0.461935	0.248715		-0.248715	0.21322	0.248715	0.21322	0.0618592	0.0454628		0	0	1	0	3
	8	40.552	-1.50843	-1.3943		1.3943	-0.114134	1.3943	0.114134	1.94407	0.0130266		0	1	0	0	2
	9	41.86	-1.62262	-1.11718		1.11718	-0.50544	1.11718	0.50544	1.2481	0.25547		0	1	0	0	2
	19	141.181	1.10175	0.682513		-0.682513	0.419234	0.682513	0.419234	0.465824	0.175757		0	1	0	0	2
	20	130.401	0.435197	0.250347		-0.250347	0.184849	0.250347	0.184849	0.0626737	0.0341693		0	0	1	0	3
	21	41.808	-1.62653	-1.11556		1.11556	-0.510968	1.11556	0.510968	1.24447	0.261088		0	1	0	0	2
	22	40.383	-1.50262	-1.40186		1.40186	-0.100765	1.40186	0.100765	1.9652	0.0101535		0	1	0	0	2
26	5	147.696	1.60275	2.19448		-2.19448	-0.591729	2.19448	0.591729	4.81574	0.350144		1	3	0	0	1
	6	151.039	0.528283	0.570276		-0.570276	-0.0419927	0.570276	0.0419927	0.325215	0.00176338		0	1	3	0	2
	7	133.55	0.171372	0.313724		-0.313724	-0.142352	0.313724	0.142352	0.0984227	0.020264		0	0	1	3	3
	9	138.093	0.171512	0.109175		-0.109175	0.0623371	0.109175	0.0623371	0.0119192	0.00388592		0	0	0	1	3
	11	134.211	0.17128	0.360593		-0.360593	-0.189312	0.360593	0.189312	0.130027	0.0358392		0	0	1	3	3
	13	151.873	0.381831	0.558957		-0.558957	-0.177125	0.558957	0.177125	0.312432	0.0313734		0	1	3	0	2
	14	28.003	0.170144	0.00990116		-0.00990116	0.160243	0.00990116	0.160243	9.80329e-05	0.0256777		0	0	1	3	3
	18	25.081	0.170971	-0.199493		0.199493	0.370464	0.199493	0.370464	0.0397975	0.137243		0	0	1	3	3
27	3	29.39	-0.281515	0.366665		-0.366665	-0.64818	0.366665	0.64818	0.134443	0.420137		1	0	0	0	1
	6	146.471	0.410976	0.563681		-0.563681	-0.152705	0.563681	0.152705	0.317736	0.0233188		0	1	0	0	2
	7	146.755	-0.724402	-1.2609		1.2609	0.536499	1.2609	0.536499	1.58987	0.287831		0	0	1	0	3
	8	131.798	0.171512	0.209832		-0.209832	-0.0383199	0.209832	0.0383199	0.0440295	0.00146841		0	0	0	1	3
	10	129.312	0.171512	0.221576		-0.221576	-0.050064	0.221576	0.050064	0.0490961	0.00250641		0	0	0	0	3
	12	129.582	0.171512	0.141907		-0.141907	0.0296057	0.141907	0.0296057	0.0201375	0.0008765		0	0	0	1	3
	14	131.633	0.166682	0.177385		-0.177385	-0.0107025	0.177385	0.0107025	0.0314654	0.000114544		0	0	1	0	3
	16	20.946	-0.801734	-1.18504		1.18504	0.383302	1.18504	0.383302	1.40431	0.146921		0	0	0	0	3
	20	146.671	1.41259	1.95287		-1.95287	-0.540282	1.95287	0.540282	3.8137	0.291905		1	0	0	0	1
	21	142.069	0.996664	0.420983		-0.420983	0.575681	0.420983	0.575681	0.177227	0.331409		0	1	0	0	2
	23	132.467	0.164169	0.12669		-0.12669	0.0374785	0.12669	0.0374785	0.0160504	0.00140464		0	0	1	0	3
	25	132.974	0.171512	0.132113		-0.132113	0.0393998	0.132113	0.0393998	0.0174537	0.00155235		0	0	0	1	3
	27	133.263	0.13322	0.32686		-0.32686	-0.19364	0.32686	0.19364	0.106838	0.0374965		0	0	1	0	3
	29	142.836	1.09463	0.795799		-0.795799	0.298831	0.795799	0.298831	0.633296	0.0893		0	1	0	0	2
	31	147.522	1.35567	1.34364		-1.34364	0.0120295	1.34364	0.0120295	1.80536	0.000144709		1	0	0	0	1
	32	143.15	1.02781	0.69397		-0.69397	0.33384	0.69397	0.33384	0.481594	0.111449		0	1	0	0	2
	34	133.528	0.142728	0.317752		-0.317752	-0.175024	0.317752	0.175024	0.100966	0.0306334		0	0	1	0	3
	36	134.18	0.171512	0.0986924		-0.0986924	0.0728199	0.0986924	0.0728199	0.00974019	0.00530274		0	0	0	1	3
	38	133.85	0.136502	0.27749		-0.27749	-0.140988	0.27749	0.140988	0.0770005	0.0198776		0	0	1	0	3
	40	142.137	1.1094	0.703065		-0.703065	0.406335	0.703065	0.406335	0.4943	0.165108		0	1	0	0	2
	42	146.747	1.01295	1.55187		-1.55187	-0.538918	1.55187	0.538918	2.40829	0.290433		1	0	0	0	1
	43	143.001	1.16976	0.776732		-0.776732	0.393033	0.776732	0.393033	0.603312	0.154475		0	1	0	0	2
	45	133.659	0.135021	0.340006		-0.340006	-0.204985	0.340006	0.204985	0.115604	0.042019		0	0	1	0	3
	47	134.481	0.171512	0.102008		-0.102008	0.0695044	0.102008	0.0695044	0.0104056	0.00483085		0	0	0	1	3
	49	133.715	0.133711	0.268535		-0.268535	-0.134824	0.268535	0.134824	0.0721109	0.0181774		0	0	1	0	3
	51	142.72	1.07268	0.649337		-0.649337	0.423344	0.649337	0.423344	0.421639	0.17922		0	1	0	0	2
28	1	145.4	1.36071	1.55438		-1.55438	-0.193665	1.55438	0.193665	2.41609	0.0375062		1	0	0	0	1
	2	142.582	1.20804	0.6146		-0.6146	0.593441	0.6146	0.593441	0.377734	0.352172		0	1	0	0	2
	4	133.35	0.151578	0.290852		-0.290852	-0.139274	0.290852	0.139274	0.0845951	0.0193973		0	0	1	0	3
	6	134.39	0.171512	0.102727		-0.102727	0.068785	0.102727	0.068785	0.0105529	0.00473137		0	0	0	1	3
	8	133.938	0.144207	0.299642		-0.299642	-0.155435	0.299642	0.155435	0.0897853	0.0241599		0	0	1	0	3
	10	143.057	0.996237	0.770845		-0.770845	0.225392	0.770845	0.225392	0.594202	0.0508016		0	1	0	0	2
	13	145.325	0.915706	1.55299		-1.55299	-0.637288	1.55299	0.637288	2.41179	0.406136		1	0	0	0	1
	14	142.827	1.15907	0.581421		-0.581421	0.577647	0.581421	0.577647	0.33805	0.333676		0	1	0	0	2
	16	133.496	0.132731	0.275709		-0.275709	-0.142978	0.275709	0.142978	0.0760153	0.0204426		0	0	1	0	3
	18	134.324	0.171512	0.105194		-0.105194	0.0663186	0.105194	0.0663186	0.0110657	0.00439816		0	0	0	1	3
	20	134.211	0.132931	0.312767		-0.312767	-0.179836	0.312767	0.179836	0.0978232	0.032341		0	0	1	0	3
	22	143.049	0.887578	0.779215		-0.779215	0.108363	0.779215	0.108363	0.607176	0.0117425		0	1	0	0	2
	24	145.528	1.25236	1.46387		-1.46387	-0.21151	1.46387	0.21151	2.14292	0.0447365		1	0	0	0	1
	25	142.667	0.972474	0.768781		-0.768781	0.203694	0.768781	0.203694	0.591024	0.0414911		0	1	0	0	2
	27	134.018	0.160165	0.296618		-0.296618	-0.136454	0.296618	0.136454	0.0879825	0.0186196		0	0	1	0	3
	29	134.319	0.171512	0.106826		-0.106826	0.0646863	0.106826	0.0646863	0.0114118	0.00418431		0	0	0	1	3
	31	133.481	0.152298	0.282704		-0.282704	-0.130405	0.282704	0.130405	0.0799213	0.0170056		0	0	1	0	3
	33	142.658	1.23416	0.599238		-0.599238	0.634924	0.599238	0.634924	0.359086	0.403129		0	1	0	0	2
	35	145.439	0.952001	1.45833		-1.45833	-0.506324	1.45833	0.506324	2.12671	0.256364		1	0	0	0	1
	36	142.501	0.999287	0.765007		-0.765007	0.23428	0.765007	0.23428	0.585235	0.054887		0	1	0	0	2
	38	133.928	0.134934	0.283694		-0.283694	-0.14876	0.283694	0.14876	0.0804826	0.0221297		0	0	1	0	3
	40	134.317	0.171512	0.105134		-0.105134	0.0663783	0.105134	0.0663783	0.0110532	0.00440608		0	0	0	1	3
	42	133.32	0.136623	0.296612		-0.296612	-0.159989	0.296612	0.159989	0.0879785	0.0255964		0	0	1	0	3
	44	142.688	1.13859	0.62791		-0.62791	0.510678	0.62791	0.510678	0.394271	0.260792		0	1	0	0	2
30	3	-0.679	0.150929	2.11148		-2.11148	-1.96055	2.11148	1.96055	4.45834	3.84376		1	1	0	0	1
	7	-1.79	5.93787	-0.973474		0.973474	6.91134	0.973474	6.91134	0.947652	47.7667		1	1	0	0	1
	11	153.864	2.98614	-0.362122		0.362122	3.34827	0.362122	3.34827	0.131132	11.2109		1	1	0	0	1
	12	155.741	2.35851	0.705355		-0.705355	1.65315	0.705355	1.65315	0.497526	2.73291		0	1	1	0	2
	13	135.711	0.128672	0.141711		-0.141711	-0.0130392	0.141711	0.0130392	0.020082	0.00017002		0	0	1	1	3
	15	131.496	0.171512	0.186219		-0.186219	-0.014707	0.186219	0.014707	0.0346777	0.000216297		0	0	0	1	3
	17	133.119	0.428966	0.057185		-0.057185	0.371781	0.057185	0.371781	0.00327012	0.138221		0	0	1	1	3
	19	157.455	1.27195	0.742736		-0.742736	0.529214	0.742736	0.529214	0.551657	0.280068		0	1	1	0	2
	20	147.589	0.880101	0.345485		-0.345485	0.534617	0.345485	0.534617	0.11936	0.285815		0	0	1	1	3
	21	142.149	0.171512	0.169628		-0.169628	0.00188451	0.169628	0.00188451	0.0287736	3.55139e-06		0	0	0	1	3
	22	133.415	1.97248	0.152309		-0.152309	1.82017	0.152309	1.82017	0.0231981	3.31301		0	0	0	0	3
	24	142.762	0.171512	0.125445		-0.125445	0.0460675	0.125445	0.0460675	0.0157364	0.00212221		0	0	0	0	3
	25	133.427	1.96709	0.156302		-0.156302	1.81078	0.156302	1.81078	0.0244304	3.27893		0	0	0	0	3
	27	144.498	0.170531	0.14045		-0.14045	0.0300809	0.14045	0.0300809	0.0197261	0.000904863		0	0	0	1	3
	28	27.184	0.171512	0.148369		-0.148369	0.0231431	0.148369	0.0231431	0.0220134	0.000535601		0	0	0	0	3
	32	21.621	0.171512	0.120683		-0.120683	0.0508295	0.120683	0.0508295	0.0145644	0.00258363		0	0	0	0	3
	36	27.698	0.171512	0.249365		-0.249365	-0.0778524	0.249365	0.0778524	0.0621828	0.006061		0	0	0	0	3
	40	148.147	0.144342	0.53672		-0.53672	-0.392377	0.53672	0.392377	0.288068	0.15396		0	0	1	1	3
	41	140.564	0.1502	0.119848		-0.119848	0.0303519	0.119848	0.0303519	0.0143635	0.000921237		0	0	0	1	3
	42	135.816	0.461098	0.217837		-0.217837	0.243261	0.217837	0.243261	0.0474529	0.0591758		0	0	0	0	3
	44	141.231	0.171512	0.140493		-0.140493	0.0310194	0.140493	0.0310194	0.0197383	0.000962201		0	0	0	0	3
	45	137.574	2.04994	0.214415		-0.214415	1.83553	0.214415	1.83553	0.045974	3.36916		0	0	0	0	3
	47	138.305	0.171512	0.145235		-0.145235	0.0262778	0.145235	0.0262778	0.0210931	0.00069052		0	0	0	1	3
	48	27.007	0.171512	0.137593		-0.137593	0.033919	0.137593	0.033919	0.0189319	0.0011505		0	0	0	0	3
	52	24.303	0.171512	0.135388		-0.135388	0.0361248	0.135388	0.0361248	0.0183298	0.001305		0	0	0	0	3
	56	26.187	0.171512	0.134398		-0.134398	0.0371147	0.134398	0.0371147	0.0180627	0.0013775		0	0	0	0	3
	60	160.455	2.92906	-0.256936		0.256936	3.186	0.256936	3.186	0.0660162	10.1506		1	1	0	0	1
	61	152.728	1.29626	0.723209		-0.723209	0.573047	0.723209	0.573047	0.523031	0.328383		0	1	1	0	2
	62	135.744	0.139439	-0.139029		0.139029	0.278468	0.139029	0.278468	0.0193291	0.0775447		0	0	1	1	3
	64	132.212	0.171512	0.214743		-0.214743	-0.0432304	0.214743	0.0432304	0.0461144	0.00186887		0	0	0	1	3
	66	136.363	0.424997	0.184015		-0.184015	0.240983	0.184015	0.240983	0.0338614	0.0580726		0	0	1	1	3
	68	161.351	1.26307	0.86452		-0.86452	0.39855	0.86452	0.39855	0.747395	0.158842		0	1	1	0	2
	69	151.685	0.562584	0.913362		-0.913362	-0.350779	0.913362	0.350779	0.83423	0.123046		0	0	1	1	3
	70	145.406	0.171512	0.0906643		-0.0906643	0.0808481	0.0906643	0.0808481	0.00822001	0.00653641		0	0	0	1	3
	71	138.109	0.836268	0.195936		-0.195936	0.640332	0.195936	0.640332	0.0383911	0.410025		0	0	0	0	3
	73	145.55	0.171512	0.119254		-0.119254	0.0522583	0.119254	0.0522583	0.0142215	0.00273093		0	0	0	0	3
	74	134.921	0.908697	0.222121		-0.222121	0.686577	0.222121	0.686577	0.0493375	0.471388		0	0	0	0	3
	76	143.307	0.171355	0.0240091		-0.0240091	0.147346	0.0240091	0.147346	0.000576438	0.0217108		0	0	0	1	3
	77	30.511	0.171512	0.137281		-0.137281	0.034231	0.137281	0.034231	0.0188461	0.00117176		0	0	0	0	3
	81	22.619	0.171512	0.1481		-0.1481	0.0234125	0.1481	0.0234125	0.0219336	0.000548145		0	0	0	0	3
	85	20.391	0.171512	0.21548		-0.21548	-0.0439677	0.21548	0.0439677	0.0464316	0.00193316		0	0	0	0	3
	89	147.651	0.854292	0.270509		-0.270509	0.583783	0.270509	0.583783	0.073175	0.340803		0	0	1	1	3
	90	144.525	0.171512	0.138377		-0.138377	0.0331352	0.138377	0.0331352	0.0191482	0.00109794		0	0	0	1	3
	91	132.979	1.84529	0.17889		-0.17889	1.6664	0.17889	1.6664	0.0320017	2.77689		0	0	0	0	3
	93	142.488	0.171512	0.132157		-0.132157	0.0393554	0.132157	0.0393554	0.0174654	0.00154885		0	0	0	0	3
	94	136.325	2.42692	0.202275		-0.202275	2.22464	0.202275	2.22464	0.0409151	4.94903		0	0	0	0	3
	96	142.673	0.171512	0.145765		-0.145765	0.0257476	0.145765	0.0257476	0.0212474	0.000662939		0	0	0	1	3
	97	23.617	0.171512	0.145133		-0.145133	0.0263794	0.145133	0.0263794	0.0210636	0.000695874		0	0	0	0	3
	101	22.972	0.171512	0.129706		-0.129706	0.0418067	0.129706	0.0418067	0.0168236	0.0017478		0	0	0	0	3
	105	26.055	0.171512	0.134499		-0.134499	0.0370137	0.134499	0.0370137	0.0180899	0.00137002		0	0	0	0	3
31	2	182.72	12.3767	-0.412565		0.412565	12.7893	0.412565	12.7893	0.17021	163.566		1	0	0	0	1
	3	150.106	2.50174	0.621285		-0.621285	1.88046	0.621285	1.88046	0.385995	3.53611		0	1	0	0	2
	4	142.231	0.972516	-0.0342234		0.0342234	1.00674	0.0342234	1.00674	0.00117124	1.01352		0	0	1	0	3
	6	142.149	0.998788	-0.032198		0.032198	1.03099	0.032198	1.03099	0.00103671	1.06293		0	0	1	0	3
	8	149.857	2.50101	0.620202		-0.620202	1.88081	0.620202	1.88081	0.38465	3.53745		0	1	0	0	2
	9	182.75	11.5799	-0.383535		0.383535	11.9634	0.383535	11.9634	0.147099	143.124		1	0	0	0	1
	10	142.908	1.60614	0.798109		-0.798109	0.808028	0.798109	0.808028	0.636978	0.652909		0	1	0	0	2
	12	128.732	0.245946	0.596356		-0.596356	-0.350409	0.596356	0.350409	0.35564	0.122787		0	0	1	0	3
	14	124.769	0.171512	0.12208		-0.12208	0.0494322	0.12208	0.0494322	0.0149036	0.00244354		0	0	0	1	3
	16	129.39	0.370462	0.508128		-0.508128	-0.137667	0.508128	0.137667	0.258194	0.0189521		0	0	1	0	3
	18	129.404	0.309261	0.50902		-0.50902	-0.199759	0.50902	0.199759	0.259102	0.0399037		0	0	1	0	3
	20	124.724	0.171512	0.122261		-0.122261	0.0492516	0.122261	0.0492516	0.0149477	0.00242572		0	0	0	1	3
	22	128.615	0.299579	0.597448		-0.597448	-0.297869	0.597448	0.297869	0.356945	0.088726		0	0	1	0	3
	24	143.281	1.61015	0.789739		-0.789739	0.820414	0.789739	0.820414	0.623687	0.67308		0	1	0	0	2
	26	181.274	14.4307	1.46727		-1.46727	12.9635	1.46727	12.9635	2.15287	168.051		1	0	0	0	1
	27	147.782	0.961369	0.803036		-0.803036	0.158333	0.803036	0.158333	0.644866	0.0250693		0	1	0	0	2
	29	128.841	0.530383	0.271886		-0.271886	0.258497	0.271886	0.258497	0.073922	0.0668209		0	0	1	0	3
	31	126.705	0.171512	0.0119638		-0.0119638	0.159549	0.0119638	0.159549	0.000143132	0.0254557		0	0	0	1	3
	33	129.955	0.425475	0.703983		-0.703983	-0.278508	0.703983	0.278508	0.495593	0.0775668		0	0	1	0	3
	35	148.151	1.10073	0.95249		-0.95249	0.148237	0.95249	0.148237	0.907237	0.0219743		0	1	0	0	2
32	4	128.225	0.171512	0.77211		-0.77211	-0.600597	0.77211	0.600597	0.596153	0.360717		0	1	1	0	2
	5	136.585	0.171512	0.221264		-0.221264	-0.0497521	0.221264	0.0497521	0.048958	0.00247527		0	0	1	1	3
	7	137.114	0.171512	0.170891		-0.170891	0.000621113	0.170891	0.000621113	0.0292038	3.85782e-07		0	0	0	1	3
	9	142.138	0.171512	0.181549		-0.181549	-0.0100369	0.181549	0.0100369	0.0329601	0.00010074		0	0	0	0	3
	11	137.004	0.171512	0.264053		-0.264053	-0.0925404	0.264053	0.0925404	0.0697238	0.00856372		0	0	0	1	3
	13	137.279	0.171512	0.53959		-0.53959	-0.368078	0.53959	0.368078	0.291157	0.135481		0	0	1	1	3
	15	122.638	0.171512	-0.0858832		0.0858832	0.257396	0.0858832	0.257396	0.00737592	0.0662525		0	1	1	0	2
	16	136.869	0.171512	0.326012		-0.326012	-0.1545	0.326012	0.1545	0.106284	0.0238702		0	0	1	1	3
	18	137.822	0.171512	0.228483		-0.228483	-0.0569705	0.228483	0.0569705	0.0522044	0.00324564		0	0	0	1	3
	20	142.067	0.171512	0.148963		-0.148963	0.0225491	0.148963	0.0225491	0.0221901	0.00050846		0	0	0	0	3
	22	137.368	0.171512	0.190065		-0.190065	-0.0185524	0.190065	0.0185524	0.0361246	0.00034419		0	0	0	1	3
	24	141.813	0.171512	0.225219		-0.225219	-0.0537066	0.225219	0.0537066	0.0507236	0.0028844		0	0	1	1	3
	26	40.827	0.171512	1.84022		-1.84022	-1.66871	1.84022	1.66871	3.38642	2.78459		0	1	1	0	2
	29	162.757	0.171512	1.38944		-1.38944	-1.21793	1.38944	1.21793	1.93054	1.48335		0	1	1	0	2
	30	132.482	0.171512	-0.12519		0.12519	0.296703	0.12519	0.296703	0.0156726	0.0880324		0	0	1	1	3
	32	151.399	0.171512	0.244819		-0.244819	-0.0733071	0.244819	0.0733071	0.0599365	0.00537393		0	0	0	1	3
	34	131.341	0.171512	0.139743		-0.139743	0.0317694	0.139743	0.0317694	0.0195281	0.00100929		0	0	1	1	3
	36	154.266	0.171512	0.306413		-0.306413	-0.1349	0.306413	0.1349	0.0938888	0.0181981		0	1	1	0	2
33	4	168.296	0.982586	1.50306		-1.50306	-0.520477	1.50306	0.520477	2.2592	0.270896		1	0	0	0	1
	5	142.814	-0.231141	-0.86264		0.86264	0.631499	0.86264	0.631499	0.744148	0.398791		0	0	1	0	3
	6	127.917	0.133394	0.664804		-0.664804	-0.53141	0.664804	0.53141	0.441965	0.282397		0	0	1	0	3
	7	147.86	1.0745	1.13661		-1.13661	-0.0621084	1.13661	0.0621084	1.29188	0.00385745		0	1	0	0	2
	8	159.134	0.151667	0.354801		-0.354801	-0.203134	0.354801	0.203134	0.125884	0.0412635		0	1	0	0	2
	9	121.489	0.171512	0.249078		-0.249078	-0.0775657	0.249078	0.0775657	0.0620399	0.00601644		0	0	1	0	3
	10	143.548	0.171512	0.171363		-0.171363	0.000148863	0.171363	0.000148863	0.0293654	2.21601e-08		0	0	0	1	3
	11	124.36	0.171512	0.194622		-0.194622	-0.0231093	0.194622	0.0231093	0.0378776	0.000534042		0	0	1	0	3
	12	154.535	0.171512	0.216944		-0.216944	-0.0454312	0.216944	0.0454312	0.0470645	0.00206399		0	1	0	0	2
	13	155.199	1.83494	2.2831		-2.2831	-0.448164	2.2831	0.448164	5.21256	0.200851		1	0	0	0	1
	14	141.615	0.899727	0.729419		-0.729419	0.170308	0.729419	0.170308	0.532052	0.0290049		0	1	0	0	2
	15	132.311	0.13742	0.320516		-0.320516	-0.183095	0.320516	0.183095	0.10273	0.0335239		0	0	1	0	3
	16	132.681	0.171512	0.104165		-0.104165	0.067347	0.104165	0.067347	0.0108504	0.00453561		0	0	0	1	3
	17	132.703	0.149932	0.293679		-0.293679	-0.143747	0.293679	0.143747	0.0862476	0.0206632		0	0	1	0	3
	18	141.891	1.12672	0.699459		-0.699459	0.427261	0.699459	0.427261	0.489244	0.182552		0	1	0	0	2
	31	168.645	0.850592	1.47129		-1.47129	-0.620693	1.47129	0.620693	2.16468	0.38526		1	0	0	0	1
	32	156.009	2.06321	2.30237		-2.30237	-0.239163	2.30237	0.239163	5.30091	0.0571992		1	0	0	0	1
	33	159.83	0.165175	0.357209		-0.357209	-0.192034	0.357209	0.192034	0.127598	0.0368769		0	1	0	0	2
	34	155.101	0.171512	0.217636		-0.217636	-0.046124	0.217636	0.046124	0.0473656	0.00212743		0	1	0	0	2
	36	147.902	0.701795	1.14654		-1.14654	-0.444741	1.14654	0.444741	1.31454	0.197795		0	1	0	0	2
	37	141.786	1.17551	0.69676		-0.69676	0.478753	0.69676	0.478753	0.485475	0.229204		0	1	0	0	2
	38	142.085	1.0688	0.722567		-0.722567	0.346233	0.722567	0.346233	0.522104	0.119877		0	1	0	0	2
	39	121.252	0.171512	0.250411		-0.250411	-0.0788983	0.250411	0.0788983	0.0627055	0.00622494		0	0	1	0	3
	40	124.34	0.171512	0.195381		-0.195381	-0.0238686	0.195381	0.0238686	0.0381737	0.000569709		0	0	1	0	3
	42	142.684	0.116334	-0.871248		0.871248	0.987581	0.871248	0.987581	0.759072	0.975316		0	0	1	0	3
	43	127.919	0.13503	0.665574		-0.665574	-0.530543	0.665574	0.530543	0.442988	0.281476		0	0	1	0	3
	44	132.65	0.142631	0.290269		-0.290269	-0.147638	0.290269	0.147638	0.0842564	0.021797		0	0	1	0	3
	46	132.475	0.136961	0.323691		-0.323691	-0.18673	0.323691	0.18673	0.104776	0.0348682		0	0	1	0	3
	48	143.453	0.171512	0.171105		-0.171105	0.000407796	0.171105	0.000407796	0.0292768	1.66297e-07		0	0	0	1	3
	53	132.626	0.171512	0.103713		-0.103713	0.0677994	0.103713	0.0677994	0.0107564	0.00459676		0	0	0	1	3
34	2	-2.294	-0.781513	-0.252242		0.252242	-0.529271	0.252242	0.529271	0.063626	0.280128		1	0	0	0	1
	4	173.001	1.5779	1.62116		-1.62116	-0.0432548	1.62116	0.0432548	2.62816	0.00187098		1	0	0	0	1
	5	141.373	1.86766	0.504732		-0.504732	1.36293	0.504732	1.36293	0.254755	1.85757		0	1	0	0	2
	7	127.57	0.348087	0.189385		-0.189385	0.158702	0.189385	0.158702	0.0358666	0.0251863		0	0	1	0	3
	9	127.317	0.171512	0.0990861		-0.0990861	0.0724262	0.0990861	0.0724262	0.00981806	0.00524556		0	0	0	1	3
	11	123.896	0.110133	0.445665		-0.445665	-0.335532	0.445665	0.335532	0.198617	0.112582		0	0	1	0	3
	13	151.207	2.63947	1.08598		-1.08598	1.55348	1.08598	1.55348	1.17936	2.41331		0	1	0	0	2
	14	159.471	1.62127	1.05468		-1.05468	0.566589	1.05468	0.566589	1.11235	0.321024		1	0	0	0	1
	15	153.371	2.38432	1.04346		-1.04346	1.34086	1.04346	1.34086	1.0888	1.79792		0	1	0	0	2
	16	123.359	0.233853	0.372742		-0.372742	-0.138889	0.372742	0.138889	0.138937	0.0192901		0	0	1	0	3
	18	129.722	0.171512	0.0809992		-0.0809992	0.0905132	0.0809992	0.0905132	0.00656086	0.00819264		0	0	0	1	3
	20	127.791	0.297434	0.202696		-0.202696	0.0947376	0.202696	0.0947376	0.0410857	0.00897521		0	0	1	0	3
	22	142.24	1.66617	0.705649		-0.705649	0.960525	0.705649	0.960525	0.497941	0.922609		0	1	0	0	2
	24	159.944	1.05685	1.07251		-1.07251	-0.0156596	1.07251	0.0156596	1.15029	0.000245223		1	0	0	0	1
	25	142.341	1.51646	0.705524		-0.705524	0.810933	0.705524	0.810933	0.497764	0.657613		0	1	0	0	2
	27	127.929	0.254184	0.20518		-0.20518	0.0490045	0.20518	0.0490045	0.0420988	0.00240144		0	0	1	0	3
	29	129.545	0.171512	0.0812265		-0.0812265	0.0902858	0.0812265	0.0902858	0.00659774	0.00815153		0	0	0	1	3
	31	123.34	0.554141	0.371781		-0.371781	0.18236	0.371781	0.18236	0.138221	0.0332552		0	0	1	0	3
	33	153.018	2.38941	1.03821		-1.03821	1.3512	1.03821	1.3512	1.07787	1.82574		0	1	0	0	2
	34	173.356	1.33442	1.64686		-1.64686	-0.312436	1.64686	0.312436	2.71214	0.0976165		1	0	0	0	1
	35	151.501	2.78413	1.08317		-1.08317	1.70096	1.08317	1.70096	1.17325	2.89326		0	1	0	0	2
	36	124.2	0.391863	0.442899		-0.442899	-0.0510367	0.442899	0.0510367	0.19616	0.00260475		0	0	1	0	3
	38	127.393	0.171512	0.0979396		-0.0979396	0.0735727	0.0979396	0.0735727	0.00959217	0.00541294		0	0	0	1	3
	40	127.9	0.388013	0.194998		-0.194998	0.193015	0.194998	0.193015	0.0380241	0.0372549		0	0	1	0	3
	42	141.075	1.8111	0.532888		-0.532888	1.27821	0.532888	1.27821	0.28397	1.63382		0	1	0	0	2
35	1	8.6	0.855101	0.934475		-0.934475	-0.0793733	0.934475	0.0793733	0.873243	0.00630012		1	0	0	0	1
	5	9.059	0.778561	0.836072		-0.836072	-0.0575112	0.836072	0.0575112	0.699017	0.00330754		1	0	0	0	1
	9	156.219	-1.59797	-1.90833		1.90833	0.310363	1.90833	0.310363	3.64173	0.0963253		0	1	0	0	2
	10	218.36	-4.64206	-5.71816		5.71816	1.0761	5.71816	1.0761	32.6973	1.15799		0	1	0	0	2
	11	47.905	0.0471593	0.020386		-0.020386	0.0267733	0.020386	0.0267733	0.000415589	0.000716808		0	0	0	1	3
	15	47.743	0.0368407	-0.0521104		0.0521104	0.0889511	0.0521104	0.0889511	0.00271549	0.00791229		0	0	0	1	3
36	6	5.259	2.59384	0.28931		-0.28931	2.30453	0.28931	2.30453	0.0837005	5.31084		0	1	1	1	2
	10	4.788	1.81749	0.2848		-0.2848	1.53269	0.2848	1.53269	0.0811111	2.34915		0	1	1	1	2
	14	5.008	2.37464	0.339991		-0.339991	2.03465	0.339991	2.03465	0.115594	4.13981		0	1	1	1	2
	18	3.886	2.20389	0.183927		-0.183927	2.01996	0.183927	2.01996	0.0338291	4.08026		0	1	1	1	2
	22	7.06	2.7028	0.359285		-0.359285	2.34351	0.359285	2.34351	0.129086	5.49205		0	1	1	1	2
	26	5.775	1.80212	0.382193		-0.382193	1.41992	0.382193	1.41992	0.146072	2.01618		0	1	1	1	2
	30	5.332	2.07225	0.307138		-0.307138	1.76512	0.307138	1.76512	0.0943338	3.11564		0	1	1	1	2
	34	5.302	2.36644	0.286959		-0.286959	2.07948	0.286959	2.07948	0.0823456	4.32423		0	1	1	1	2
	38	4.395	2.25025	0.284982		-0.284982	1.96527	0.284982	1.96527	0.0812145	3.86229		0	1	1	1	2
	42	1.327	-2.47649	-4.90455		4.90455	2.42806	4.90455	2.42806	24.0546	5.89549		1	2	0	0	1
	47	5.439	2.53174	0.369287		-0.369287	2.16245	0.369287	2.16245	0.136373	4.6762		0	1	1	1	2
	51	4.404	2.40187	0.408334		-0.408334	1.99353	0.408334	1.99353	0.166736	3.97418		0	1	1	1	2
	55	6.677	2.79512	0.307514		-0.307514	2.4876	0.307514	2.4876	0.0945648	6.18818		0	1	1	1	2
	59	5.24	2.0625	0.253869		-0.253869	1.80863	0.253869	1.80863	0.0644496	3.27116		0	1	1	1	2
	63	4.985	2.31444	0.201892		-0.201892	2.11254	0.201892	2.11254	0.0407606	4.46284		0	1	1	1	2
	67	5.972	2.88564	0.528139		-0.528139	2.3575	0.528139	2.3575	0.278931	5.55781		0	1	1	1	2
	71	4.653	2.1547	0.219128		-0.219128	1.93557	0.219128	1.93557	0.048017	3.74645		0	1	1	1	2
	75	5.724	2.4537	0.254433		-0.254433	2.19927	0.254433	2.19927	0.064736	4.83679		0	1	1	1	2
	79	5.426	2.82628	0.186081		-0.186081	2.64019	0.186081	2.64019	0.0346263	6.97063		0	1	1	1	2
	83	1.124	-2.12917	-4.96731		4.96731	2.83814	4.96731	2.83814	24.6741	8.05504		1	2	0	0	1
37	3	148.728	0.170921	3.22023		-3.22023	-3.04931	3.22023	3.04931	10.3699	9.29829		0	1	0	0	2
	4	132.524	0.133135	0.0742608		-0.0742608	0.058874	0.0742608	0.058874	0.00551466	0.00346615		0	0	1	0	3
	5	129.032	1.45308	0.357183		-0.357183	1.09589	0.357183	1.09589	0.12758	1.20098		0	0	0	1	3
	7	157.011	0.171512	0.0948683		-0.0948683	0.076644	0.0948683	0.076644	0.009	0.00587431		0	0	0	0	3
	8	122.593	1.98969	0.183137		-0.183137	1.80656	0.183137	1.80656	0.0335392	3.26365		0	0	0	1	3
	10	128.425	0.171512	0.890504		-0.890504	-0.718992	0.890504	0.718992	0.792998	0.516949		0	0	1	0	3
	11	128.242	0.171512	0.895523		-0.895523	-0.724011	0.895523	0.724011	0.801962	0.524192		0	0	1	0	3
	12	123.184	2.01069	0.185776		-0.185776	1.82492	0.185776	1.82492	0.0345125	3.33032		0	0	0	1	3
	14	157.314	0.171512	0.0953125		-0.0953125	0.0761999	0.0953125	0.0761999	0.00908447	0.00580642		0	0	0	0	3
	15	129.074	1.34838	0.36247		-0.36247	0.985908	0.36247	0.985908	0.131384	0.972014		0	0	0	1	3
	17	132.234	0.137517	0.0698023		-0.0698023	0.0677145	0.0698023	0.0677145	0.00487236	0.00458525		0	0	1	0	3
	18	149.965	0.169893	3.23301		-3.23301	-3.06312	3.23301	3.06312	10.4524	9.38269		0	1	0	0	2
	19	153.626	0.188438	0.456185		-0.456185	-0.267748	0.456185	0.267748	0.208105	0.0716888		0	0	0	1	3
	20	121.146	1.15632	-0.0371078		0.0371078	1.19343	0.0371078	1.19343	0.00137699	1.42427		0	0	0	0	3
	22	172.569	0.171512	0.206075		-0.206075	-0.0345625	0.206075	0.0345625	0.0424668	0.00119456		0	0	0	0	3
	23	132.165	0.12912	0.274589		-0.274589	-0.145469	0.274589	0.145469	0.075399	0.0211613		0	0	0	0	3
	25	175.001	0.171512	0.206443		-0.206443	-0.0349307	0.206443	0.0349307	0.0426187	0.00122016		0	0	0	0	3
	26	127.81	0.962564	-0.0519333		0.0519333	1.0145	0.0519333	1.0145	0.00269707	1.02921		0	0	0	0	3
	28	40.173	0.171512	0.0287054		-0.0287054	0.142807	0.0287054	0.142807	0.000824001	0.0203938		0	0	0	0	3
	29	29.259	0.171512	0.119547		-0.119547	0.0519649	0.119547	0.0519649	0.0142916	0.00270035		0	0	0	0	3
	33	33.873	0.171512	0.0803685		-0.0803685	0.0911438	0.0803685	0.0911438	0.0064591	0.00830719		0	0	0	0	3
	37	34.61	0.171512	-0.0861525		0.0861525	0.257665	0.0861525	0.257665	0.00742226	0.0663912		0	0	0	0	3
	41	41.415	0.171512	0.028824		-0.028824	0.142688	0.028824	0.142688	0.000830822	0.02036		0	0	0	0	3
	42	34.133	0.171512	-0.0386502		0.0386502	0.210163	0.0386502	0.210163	0.00149384	0.0441683		0	0	0	0	3
	46	28.72	0.171512	0.117395		-0.117395	0.0541177	0.117395	0.0541177	0.0137815	0.00292873		0	0	0	0	3
	50	37.664	0.171512	0.0989637		-0.0989637	0.0725487	0.0989637	0.0725487	0.00979381	0.00526331		0	0	0	0	3
	54	39.258	0.171512	-0.056639		0.056639	0.228151	0.056639	0.228151	0.00320797	0.052053		0	0	0	0	3
	55	34.035	0.171512	0.224287		-0.224287	-0.0527747	0.224287	0.0527747	0.0503047	0.00278517		0	0	0	0	3
	59	30.311	0.171512	0.127618		-0.127618	0.0438941	0.127618	0.0438941	0.0162864	0.00192669		0	0	0	0	3
	63	34.083	0.171512	0.223153		-0.223153	-0.0516406	0.223153	0.0516406	0.0497972	0.00266675		0	0	0	0	3
	67	39.027	0.171512	-0.0567392		0.0567392	0.228251	0.0567392	0.228251	0.00321933	0.0520987		0	0	0	0	3
	68	34.317	0.171512	0.222137		-0.222137	-0.0506248	0.222137	0.0506248	0.0493449	0.00256287		0	0	0	0	3
	72	33.823	0.171512	0.224501		-0.224501	-0.0529886	0.224501	0.0529886	0.0504007	0.00280779		0	0	0	0	3
	76	30.355	0.171512	0.12781		-0.12781	0.0437027	0.12781	0.0437027	0.0163353	0.00190992		0	0	0	0	3
	80	155.361	0.160065	0.458321		-0.458321	-0.298256	0.458321	0.298256	0.210058	0.0889567		0	0	0	1	3
	81	126.947	0.927409	0.0290356		-0.0290356	0.898374	0.0290356	0.898374	0.000843064	0.807076		0	0	0	0	3
	83	170.472	0.171512	0.197983		-0.197983	-0.0264703	0.197983	0.0264703	0.0391971	0.000700676		0	0	0	0	3
	84	132.256	0.128752	0.276851		-0.276851	-0.148099	0.276851	0.148099	0.0766466	0.0219334		0	0	0	0	3
	86	171.218	0.171512	0.213725		-0.213725	-0.0422127	0.213725	0.0422127	0.0456784	0.00178192		0	0	0	0	3
	87	121.995	1.15545	-0.135216		0.135216	1.29066	0.135216	1.29066	0.0182835	1.66581		0	0	0	0	3
	89	40.457	0.171512	0.028926		-0.028926	0.142586	0.028926	0.142586	0.000836713	0.0203309		0	0	0	0	3
	90	36.137	0.171512	0.09758		-0.09758	0.0739324	0.09758	0.0739324	0.00952185	0.00546599		0	0	0	0	3
	94	32.834	0.171512	-0.0436227		0.0436227	0.215135	0.0436227	0.215135	0.00190294	0.0462831		0	0	0	0	3
	98	29.555	0.171512	0.117076		-0.117076	0.0544365	0.117076	0.0544365	0.0137068	0.00296334		0	0	0	0	3
	102	40.301	0.171512	0.0293547		-0.0293547	0.142158	0.0293547	0.142158	0.000861699	0.0202088		0	0	0	0	3
	103	34.987	0.171513	-0.0936112		0.0936112	0.265124	0.0936112	0.265124	0.00876305	0.0702906		0	0	0	0	3
	107	28.259	0.171512	0.118719		-0.118719	0.0527937	0.118719	0.0527937	0.0140941	0.00278718		0	0	0	0	3
	111	35.08	0.171512	0.0842167		-0.0842167	0.0872957	0.0842167	0.0872957	0.00709245	0.00762053		0	0	0	0	3
38	7	76.557	0.171512	-0.142584		0.142584	0.314096	0.142584	0.314096	0.0203302	0.0986566		0	1	0	0	2
	8	32.583	0.16439	0.475086		-0.475086	-0.310696	0.475086	0.310696	0.225707	0.0965321		0	0	1	0	3
	12	34.954	0.171512	-0.0416612		0.0416612	0.213173	0.0416612	0.213173	0.00173566	0.0454429		0	0	1	0	3
	16	32.538	0.171449	0.109397		-0.109397	0.0620516	0.109397	0.0620516	0.0119678	0.0038504		0	0	1	0	3
	20	73.799	0.180568	0.106806		-0.106806	0.0737623	0.106806	0.0737623	0.0114075	0.00544087		0	1	0	0	2
	23	66.834	0.171512	0.231894		-0.231894	-0.0603819	0.231894	0.0603819	0.0537749	0.00364597		0	1	0	0	2
	24	27.177	0.171512	0.118546		-0.118546	0.0529661	0.118546	0.0529661	0.0140532	0.00280541		0	0	1	0	3
	28	20.631	0.171386	0.0702773		-0.0702773	0.101109	0.0702773	0.101109	0.00493889	0.0102231		0	0	1	0	3
	32	71.937	0.171512	-0.0118895		0.0118895	0.183402	0.0118895	0.183402	0.000141361	0.0336362		0	1	0	0	2
	33	60.053	0.171509	0.360484		-0.360484	-0.188975	0.360484	0.188975	0.129949	0.0357114		0	1	0	0	2
	36	31.837	0.171502	0.316933		-0.316933	-0.145432	0.316933	0.145432	0.100447	0.0211503		0	0	1	0	3
	40	36.642	0.171512	0.0521961		-0.0521961	0.119316	0.0521961	0.119316	0.00272444	0.0142364		0	0	1	0	3
	44	71.591	0.171512	0.0230651		-0.0230651	0.148447	0.0230651	0.148447	0.000531999	0.0220366		0	1	0	0	2
	45	63.343	0.166611	0.300121		-0.300121	-0.13351	0.300121	0.13351	0.0900726	0.0178248		0	1	0	0	2
	48	32.552	0.171511	0.127607		-0.127607	0.0439034	0.127607	0.0439034	0.0162836	0.00192751		0	0	1	0	3
	52	35.861	0.170733	0.184086		-0.184086	-0.0133526	0.184086	0.0133526	0.0338875	0.000178292		0	0	1	0	3
39	4	142.286	-0.502925	-0.998803		0.998803	0.495878	0.998803	0.495878	0.997608	0.245895		1	0	0	0	1
	5	142.42	0.674924	0.983937		-0.983937	-0.309013	0.983937	0.309013	0.968132	0.0954888		0	1	0	0	2
	7	133.686	0.133344	0.227463		-0.227463	-0.094119	0.227463	0.094119	0.0517393	0.00885838		0	0	1	0	3
	9	134.236	0.171512	0.0772082		-0.0772082	0.0943042	0.0772082	0.0943042	0.0059611	0.00889328		0	0	0	1	3
	11	133.773	0.133241	0.298354		-0.298354	-0.165113	0.298354	0.165113	0.0890148	0.0272622		0	0	1	0	3
	13	142.779	0.579687	0.998278		-0.998278	-0.418592	0.998278	0.418592	0.99656	0.175219		0	1	0	0	2
40	2	150.668	6.72984	-0.203753		0.203753	6.93359	0.203753	6.93359	0.0415154	48.0747		1	0	0	0	1
	3	157.879	2.0969	0.687686		-0.687686	1.40921	0.687686	1.40921	0.472913	1.98588		0	1	0	0	2
	4	132.611	0.25965	-0.00859252		0.00859252	0.268242	0.00859252	0.268242	7.38314e-05	0.0719538		0	0	1	0	3
	6	132.51	0.171512	0.182091		-0.182091	-0.0105782	0.182091	0.0105782	0.033157	0.000111899		0	0	0	1	3
	8	144.463	1.22561	0.527682		-0.527682	0.697927	0.527682	0.697927	0.278448	0.487103		0	0	1	0	3
	9	153.445	0.171512	0.160809		-0.160809	0.0107032	0.160809	0.0107032	0.0258596	0.000114559		0	0	0	1	3
	10	127.927	2.28723	0.253365		-0.253365	2.03387	0.253365	2.03387	0.0641938	4.13661		0	0	0	0	3
	12	156.156	0.171512	0.138821		-0.138821	0.0326918	0.138821	0.0326918	0.0192712	0.00106875		0	0	0	0	3
	13	124.819	1.79172	0.25426		-0.25426	1.53746	0.25426	1.53746	0.064648	2.36379		0	0	0	0	3
	15	153.185	0.171234	0.109952		-0.109952	0.0612817	0.109952	0.0612817	0.0120895	0.00375545		0	0	0	1	3
	16	33.952	0.171512	0.0468147		-0.0468147	0.124698	0.0468147	0.124698	0.00219162	0.0155495		0	0	0	0	3
	18	26.118	0.171512	0.0728323		-0.0728323	0.0986801	0.0728323	0.0986801	0.00530454	0.00973776		0	0	0	0	3
	22	23.781	0.171512	0.120014		-0.120014	0.0514983	0.120014	0.0514983	0.0144034	0.00265207		0	0	0	0	3
	26	40.956	0.171512	0.0395685		-0.0395685	0.131944	0.0395685	0.131944	0.00156567	0.0174092		0	0	0	0	3
	28	26.972	0.171512	0.08646		-0.08646	0.0850524	0.08646	0.0850524	0.00747532	0.00723391		0	0	0	0	3
	32	26.952	0.171512	0.0897756		-0.0897756	0.0817367	0.0897756	0.0817367	0.00805966	0.00668089		0	0	0	0	3
	36	35.728	0.171512	0.0824861		-0.0824861	0.0890262	0.0824861	0.0890262	0.00680396	0.00792567		0	0	0	0	3
	38	22.988	0.171512	0.0973039		-0.0973039	0.0742084	0.0973039	0.0742084	0.00946805	0.00550689		0	0	0	0	3
	42	27.392	0.171512	0.0767		-0.0767	0.0948123	0.0767	0.0948123	0.0058829	0.00898937		0	0	0	0	3
	48	157.907	2.09302	0.684387		-0.684387	1.40863	0.684387	1.40863	0.468386	1.98423		0	1	0	0	2
	49	132.591	0.260165	-0.00835504		0.00835504	0.26852	0.00835504	0.26852	6.98067e-05	0.0721031		0	0	1	0	3
	51	144.653	1.23529	0.52632		-0.52632	0.708968	0.52632	0.708968	0.277013	0.502636		0	0	1	0	3
	52	153.293	0.17128	0.109747		-0.109747	0.0615335	0.109747	0.0615335	0.0120444	0.00378637		0	0	0	1	3
	53	124.738	1.77995	0.2545		-0.2545	1.52545	0.2545	1.52545	0.06477	2.32701		0	0	0	0	3
	55	156.213	0.171512	0.138869		-0.138869	0.0326433	0.138869	0.0326433	0.0192846	0.00106558		0	0	0	0	3
	56	127.98	2.27714	0.25437		-0.25437	2.02277	0.25437	2.02277	0.0647042	4.09161		0	0	0	0	3
	58	153.47	0.171512	0.159813		-0.159813	0.0116998	0.159813	0.0116998	0.02554	0.000136886		0	0	0	1	3
	59	35.699	0.171512	0.0826976		-0.0826976	0.0888148	0.0826976	0.0888148	0.00683889	0.00788806		0	0	0	0	3
	61	22.929	0.171512	0.0988077		-0.0988077	0.0727047	0.0988077	0.0727047	0.00976296	0.00528597		0	0	0	0	3
	65	27.357	0.171512	0.076773		-0.076773	0.0947393	0.076773	0.0947393	0.0058941	0.00897553		0	0	0	0	3
	69	40.925	0.171512	0.0395449		-0.0395449	0.131967	0.0395449	0.131967	0.0015638	0.0174154		0	0	0	0	3
	71	26.884	0.171512	0.0864593		-0.0864593	0.085053	0.0864593	0.085053	0.00747522	0.00723401		0	0	0	0	3
	75	26.959	0.171512	0.089858		-0.089858	0.0816543	0.089858	0.0816543	0.00807447	0.00666743		0	0	0	0	3
	79	33.996	0.171512	0.0469889		-0.0469889	0.124523	0.0469889	0.124523	0.00220795	0.0155061		0	0	0	0	3
	81	26.14	0.171512	0.0737887		-0.0737887	0.0977236	0.0737887	0.0977236	0.00544477	0.00954991		0	0	0	0	3
	85	23.998	0.171512	0.121757		-0.121757	0.0497549	0.121757	0.0497549	0.0148249	0.00247555		0	0	0	0	3
42	8	158.38	0.812471	2.43215		-2.43215	-1.61968	2.43215	1.61968	5.91534	2.62335		1	0	0	0	1
	9	143.148	0.515852	1.81829		-1.81829	-1.30244	1.81829	1.30244	3.30618	1.69635		0	1	0	0	2
	10	130.851	0.169463	-1.70675		1.70675	1.87622	1.70675	1.87622	2.91301	3.52019		0	0	1	0	3
	12	134.023	0.171512	2.00817		-2.00817	-1.83666	2.00817	1.83666	4.03274	3.3733		0	0	0	1	3
	14	134.537	0.133079	-2.77918		2.77918	2.91226	2.77918	2.91226	7.72387	8.48128		0	0	1	0	3
	16	140.377	0.241007	2.68318		-2.68318	-2.44218	2.68318	2.44218	7.19947	5.96422		0	1	0	0	2
	18	66.788	0.111376	-5.48753		5.48753	5.5989	5.48753	5.5989	30.113	31.3477		0	1	0	0	2
	21	48.12	0.0434593	0.110532		-0.110532	-0.0670724	0.110532	0.0670724	0.0122173	0.0044987		0	1	0	0	2
	25	45.227	-0.280991	-9.99206		9.99206	9.71107	9.99206	9.71107	99.8413	94.3049		0	1	0	0	2
	29	19.105	0.482917	4.29551		-4.29551	-3.81259	4.29551	3.81259	18.4514	14.5358		1	0	0	0	1
	33	219.739	-4.68976	-12.6604		12.6604	7.97064	12.6604	7.97064	160.286	63.531		0	1	0	0	2
	34	53.153	-0.238509	4.47666		-4.47666	-4.71517	4.47666	4.71517	20.0405	22.2329		0	0	0	1	3
	37	11.734	0.171512	-1.42384		1.42384	1.59535	1.42384	1.59535	2.02731	2.54514		0	0	0	0	3
	41	52.788	-0.145343	0.0291567		-0.0291567	-0.1745	0.0291567	0.1745	0.000850115	0.0304501		0	0	0	1	3
	44	11.772	0.171512	-0.184851		0.184851	0.356363	0.184851	0.356363	0.0341699	0.126995		0	0	0	0	3
	48	157.673	-1.65288	-5.1929		5.1929	3.54002	5.1929	3.54002	26.9663	12.5318		0	1	0	0	2
43	6	156.518	0.171512	1.51088		-1.51088	-1.33937	1.51088	1.33937	2.28275	1.7939		0	1	1	0	2
	7	133.317	0.171512	0.433088		-0.433088	-0.261576	0.433088	0.261576	0.187566	0.0684221		0	0	1	1	3
	9	151.095	0.171512	0.134924		-0.134924	0.0365887	0.134924	0.0365887	0.0182044	0.00133874		0	0	0	1	3
	11	133.247	0.171512	0.431007		-0.431007	-0.259494	0.431007	0.259494	0.185767	0.0673373		0	0	1	1	3
	13	155.911	0.171512	1.50122		-1.50122	-1.32971	1.50122	1.32971	2.25367	1.76813		0	1	1	0	2
	14	176.601	0.171512	1.08575		-1.08575	-0.914238	1.08575	0.914238	1.17885	0.835832		0	1	1	0	2
	15	20.159	0.16906	0.457474		-0.457474	-0.288414	0.457474	0.288414	0.209283	0.0831827		0	0	1	1	3
	19	177.649	0.171512	1.09253		-1.09253	-0.921014	1.09253	0.921014	1.19361	0.848267		0	1	1	0	2
	20	20.245	0.169954	0.455283		-0.455283	-0.28533	0.455283	0.28533	0.207283	0.081413		0	0	1	1	3
	24	141.482	0.687879	0.365058		-0.365058	0.322822	0.365058	0.322822	0.133267	0.104214		0	1	1	0	2
	25	147.954	0.171512	0.166446		-0.166446	0.00506602	0.166446	0.00506602	0.0277044	2.56645e-05		0	0	1	1	3
	26	129.075	0.171512	0.194894		-0.194894	-0.0233814	0.194894	0.0233814	0.0379836	0.000546688		0	0	0	1	3
	28	136.324	0.171512	0.17099		-0.17099	0.00052243	0.17099	0.00052243	0.0292375	2.72933e-07		0	0	0	0	3
	30	132.539	0.171512	0.169318		-0.169318	0.00219414	0.169318	0.00219414	0.0286687	4.81425e-06		0	0	0	1	3
	32	148.269	0.171512	0.127334		-0.127334	0.0441781	0.127334	0.0441781	0.016214	0.00195171		0	0	1	1	3
	33	33.962	0.171512	0.0403321		-0.0403321	0.13118	0.0403321	0.13118	0.00162668	0.0172083		0	0	0	1	3
	35	25.162	0.171512	0.0703891		-0.0703891	0.101123	0.0703891	0.101123	0.00495463	0.0102259		0	0	0	0	3
	39	27.774	0.171512	0.174031		-0.174031	-0.00251844	0.174031	0.00251844	0.0302867	6.34253e-06		0	0	0	0	3
	43	36.714	0.171512	-0.0320749		0.0320749	0.203587	0.0320749	0.203587	0.0010288	0.0414477		0	0	0	1	3
	45	26.258	0.171512	0.0446698		-0.0446698	0.126843	0.0446698	0.126843	0.00199539	0.016089		0	0	0	0	3
	49	29.479	0.171512	0.108763		-0.108763	0.062749	0.108763	0.062749	0.0118295	0.00393744		0	0	0	0	3
	53	140.597	0.686728	0.364956		-0.364956	0.321771	0.364956	0.321771	0.133193	0.103537		0	1	1	0	2
	54	145.849	0.171512	0.132063		-0.132063	0.0394493	0.132063	0.0394493	0.0174407	0.00155624		0	0	1	1	3
	55	131.58	0.171512	0.170186		-0.170186	0.00132662	0.170186	0.00132662	0.0289632	1.75992e-06		0	0	0	1	3
	57	135.998	0.171512	0.172406		-0.172406	-0.00089369	0.172406	0.00089369	0.0297238	7.98681e-07		0	0	0	0	3
	59	130.589	0.171512	0.196676		-0.196676	-0.0251633	0.196676	0.0251633	0.0386813	0.000633193		0	0	0	1	3
	61	145.499	0.171512	0.173644		-0.173644	-0.0021314	0.173644	0.0021314	0.0301521	4.54287e-06		0	0	1	1	3
	62	33.077	0.171512	0.0442062		-0.0442062	0.127306	0.0442062	0.127306	0.00195419	0.0162069		0	0	0	1	3
	64	24.183	0.171512	0.0681813		-0.0681813	0.103331	0.0681813	0.103331	0.00464869	0.0106773		0	0	0	0	3
	68	25.773	0.171512	0.161908		-0.161908	0.00960451	0.161908	0.00960451	0.0262141	9.22466e-05		0	0	0	0	3
	72	37.704	0.171512	-0.018566		0.018566	0.190078	0.018566	0.190078	0.000344695	0.0361298		0	0	0	1	3
	74	30.33	0.171512	0.104292		-0.104292	0.0672206	0.104292	0.0672206	0.0108768	0.00451861		0	0	0	0	3
	78	27.053	0.171512	0.0405175		-0.0405175	0.130995	0.0405175	0.130995	0.00164167	0.0171596		0	0	0	0	3
44	5	19.293	0.171506	0.657858		-0.657858	-0.486352	0.657858	0.486352	0.432777	0.236538		0	0	1	0	3
	10	133.975	0.171512	0.0975611		-0.0975611	0.0739513	0.0975611	0.0739513	0.00951816	0.00546879		0	0	1	0	3
	12	153.992	0.171188	-2.76191		2.76191	2.9331	2.76191	2.9331	7.62817	8.60309		0	1	0	0	2
	13	178.636	0.171512	2.52035		-2.52035	-2.34884	2.52035	2.34884	6.35218	5.51705		0	1	0	0	2
	14	134.244	0.171512	4.53228		-4.53228	-4.36077	4.53228	4.36077	20.5416	19.0163		0	0	1	0	3
	16	154.476	0.13459	22.0601		-22.0601	-21.9255	22.0601	21.9255	486.648	480.728		0	1	0	0	2
	17	152.587	0.171512	7.46989		-7.46989	-7.29838	7.46989	7.29838	55.7993	53.2663		0	1	0	0	2
	19	139.279	0.171512	-29.1524		29.1524	29.3239	29.1524	29.3239	849.86	859.889		0	0	1	0	3
	21	19.162	0.167911	1.63111		-1.63111	-1.4632	1.63111	1.4632	2.66053	2.14096		0	0	1	0	3
	25	151.906	0.171512	1.94562		-1.94562	-1.77411	1.94562	1.77411	3.78545	3.14747		0	1	0	0	2
	27	187.17	0.171414	15.8759		-15.8759	-15.7045	15.8759	15.7045	252.044	246.631		0	1	0	0	2
	28	138.161	0.171512	3.79397		-3.79397	-3.62245	3.79397	3.62245	14.3942	13.1222		0	0	1	0	3
	30	153.859	0.171512	-6.73376		6.73376	6.90527	6.73376	6.90527	45.3435	47.6828		0	0	0	1	3
	32	154.333	0.171512	3.56042		-3.56042	-3.3889	3.56042	3.3889	12.6766	11.4847		0	0	0	1	3
	34	38.582	0.171512	0.768723		-0.768723	-0.59721	0.768723	0.59721	0.590935	0.35666		0	0	1	0	3
	36	27.274	0.175002	0.621751		-0.621751	-0.44675	0.621751	0.44675	0.386575	0.199585		0	0	0	1	3
	39	77.803	0.171512	4.18828		-4.18828	-4.01677	4.18828	4.01677	17.5417	16.1344		0	1	0	0	2
	41	35.128	0.171512	-1.92918		1.92918	2.10069	1.92918	2.10069	3.72174	4.41292		0	0	1	0	3
	44	28.695	0.0747253	2.42551		-2.42551	-2.35079	2.42551	2.35079	5.8831	5.52619		0	0	0	1	3
	47	71.181	0.171512	-0.137649		0.137649	0.309162	0.137649	0.309162	0.0189473	0.0955809		0	1	0	0	2
45	6	4.981	1.34733	0.576614		-0.576614	0.770716	0.576614	0.770716	0.332484	0.594004		0	0	1	2	3
	10	7.732	0.0910266	-0.541908		0.541908	0.632935	0.541908	0.632935	0.293665	0.400607		0	0	1	2	3
	14	3.926	0.669126	-0.454261		0.454261	1.12339	0.454261	1.12339	0.206353	1.262		0	0	1	2	3
	18	7.11	2.12691	0.844946		-0.844946	1.28197	0.844946	1.28197	0.713934	1.64344		0	0	1	2	3
	22	4.825	0.751959	-1.06365		1.06365	1.81561	1.06365	1.81561	1.13135	3.29644		0	0	1	2	3
	26	6.161	0.775815	0.0146329		-0.0146329	0.761182	0.0146329	0.761182	0.000214121	0.579398		0	0	1	2	3
	34	8.719	0.107631	-0.538613		0.538613	0.646245	0.538613	0.646245	0.290104	0.417632		0	0	1	2	3
	38	5.178	0.644409	-0.449529		0.449529	1.09394	0.449529	1.09394	0.202077	1.1967		0	0	1	2	3
	42	4.224	1.21586	0.572451		-0.572451	0.643411	0.572451	0.643411	0.3277	0.413978		0	0	1	2	3
	46	4.628	0.152311	-1.06671		1.06671	1.21902	1.06671	1.21902	1.13787	1.48601		0	0	1	2	3
	50	5.875	0.410315	0.010494		-0.010494	0.399821	0.010494	0.399821	0.000110124	0.159857		0	0	1	2	3
	54	7.04	2.20872	0.845434		-0.845434	1.36328	0.845434	1.36328	0.714759	1.85855		0	0	1	2	3
46	11	135.128	0.156126	0.603696		-0.603696	-0.44757	0.603696	0.44757	0.364449	0.200319		0	1	0	0	2
	12	132.635	0.319232	0.169065		-0.169065	0.150167	0.169065	0.150167	0.028583	0.02255		0	0	1	0	3
	13	132.084	0.171512	0.112113		-0.112113	0.0593995	0.112113	0.0593995	0.0125693	0.0035283		0	0	0	1	3
	14	131.998	0.337864	0.0951998		-0.0951998	0.242664	0.0951998	0.242664	0.009063	0.0588858		0	0	1	0	3
	15	133.627	0.351385	0.468898		-0.468898	-0.117513	0.468898	0.117513	0.219865	0.0138093		0	1	0	0	2
	16	173.831	-0.0977714	-0.0544662		0.0544662	-0.0433052	0.0544662	0.0433052	0.00296657	0.00187534		1	0	0	0	1
	17	219.92	-4.82832	-5.33255		5.33255	0.50423	5.33255	0.50423	28.4361	0.254248		0	1	0	0	2
	18	54.327	-0.129623	0.0743206		-0.0743206	-0.203944	0.0743206	0.203944	0.00552355	0.0415931		0	0	0	1	3
	19	11.509	0.171512	0.0778475		-0.0778475	0.0936649	0.0778475	0.0936649	0.00606023	0.0087731		0	0	0	0	3
	20	55.031	-0.204195	-0.0576512		0.0576512	-0.146543	0.0576512	0.146543	0.00332366	0.021475		0	0	0	1	3
	21	11.879	0.171512	0.0036233		-0.0036233	0.167889	0.0036233	0.167889	1.31283e-05	0.0281867		0	0	0	0	3
	22	221.915	-4.54921	-5.55519		5.55519	1.00598	5.55519	1.00598	30.8601	1.01199		0	1	0	0	2
	23	52.972	-0.215324	0.0178219		-0.0178219	-0.233146	0.0178219	0.233146	0.00031762	0.054357		0	0	0	1	3
	24	11.4	0.171512	0.0434503		-0.0434503	0.128062	0.0434503	0.128062	0.00188793	0.0163999		0	0	0	0	3
	25	53.339	-0.228892	0.0288689		-0.0288689	-0.257761	0.0288689	0.257761	0.000833411	0.0664408		0	0	0	1	3
	26	11.831	0.171512	0.0328993		-0.0328993	0.138613	0.0328993	0.138613	0.00108236	0.0192136		0	0	0	0	3
	27	221.95	-4.51919	-5.57488		5.57488	1.05569	5.57488	1.05569	31.0793	1.11448		0	1	0	0	2
	28	53.24	-0.207801	-0.00754268		0.00754268	-0.200258	0.00754268	0.200258	5.68921e-05	0.0401032		0	0	0	1	3
	29	11.353	0.171512	0.052803		-0.052803	0.118709	0.052803	0.118709	0.00278815	0.0140919		0	0	0	0	3
	30	53.372	-0.243387	0.0518627		-0.0518627	-0.29525	0.0518627	0.29525	0.00268974	0.0871724		0	0	0	1	3
	31	12.006	0.171512	0.0190883		-0.0190883	0.152424	0.0190883	0.152424	0.000364361	0.0232331		0	0	0	0	3
49	5	119.286	0.931835	0.846248		-0.846248	0.0855871	0.846248	0.0855871	0.716136	0.00732514		1	0	0	0	1
	6	123.194	0.308598	0.511421		-0.511421	-0.202823	0.511421	0.202823	0.261551	0.041137		0	1	0	0	2
	7	121.737	0.844883	0.675111		-0.675111	0.169771	0.675111	0.169771	0.455775	0.0288224		0	0	1	0	3
	8	125.1	1.15254	0.669356		-0.669356	0.483181	0.669356	0.483181	0.448038	0.233464		0	1	0	0	2
	9	116.962	0.596213	0.367436		-0.367436	0.228777	0.367436	0.228777	0.135009	0.0523388		1	0	0	0	1
	10	3.162	0.172407	0.224434		-0.224434	-0.052027	0.224434	0.052027	0.0503707	0.00270681		0	0	1	0	3
	11	0.048	0.166458	0.169892		-0.169892	-0.00343459	0.169892	0.00343459	0.0288634	1.17964e-05		0	0	1	0	3
	12	119.134	0.856882	0.847703		-0.847703	0.009179	0.847703	0.009179	0.718601	8.4254e-05		1	0	0	0	1
	13	116.898	0.591531	0.36594		-0.36594	0.225592	0.36594	0.225592	0.133912	0.0508916		1	0	0	0	1
	14	125.085	1.13151	0.670203		-0.670203	0.461305	0.670203	0.461305	0.449172	0.212802		0	1	0	0	2
	15	121.887	0.752247	0.674083		-0.674083	0.0781644	0.674083	0.0781644	0.454388	0.00610967		0	0	1	0	3
	16	123.091	0.340892	0.514657		-0.514657	-0.173765	0.514657	0.173765	0.264872	0.0301942		0	1	0	0	2
	17	-0.06	0.166308	0.171636		-0.171636	-0.00532838	0.171636	0.00532838	0.0294589	2.83916e-05		0	0	1	0	3
	18	3.238	0.171948	0.221783		-0.221783	-0.0498351	0.221783	0.0498351	0.0491879	0.00248354		0	0	1	0	3
50	3	116.076	2.00727	0.362325		-0.362325	1.64494	0.362325	1.64494	0.131279	2.70584		1	0	0	0	1
	4	133.56	2.16931	0.436495		-0.436495	1.73281	0.436495	1.73281	0.190528	3.00263		0	1	0	0	2
	5	129.834	0.171428	0.303967		-0.303967	-0.132539	0.303967	0.132539	0.0923959	0.0175665		0	0	1	0	3
	6	130.521	0.171453	0.308761		-0.308761	-0.137307	0.308761	0.137307	0.0953331	0.0188532		0	0	1	0	3
	7	130.107	1.9947	0.422258		-0.422258	1.57245	0.422258	1.57245	0.178302	2.47259		0	1	0	0	2
	8	16.052	0.410503	0.128659		-0.128659	0.281844	0.128659	0.281844	0.016553	0.0794361		0	0	1	0	3
	9	11.471	0.171512	0.113773		-0.113773	0.0577389	0.113773	0.0577389	0.0129444	0.00333378		0	0	0	1	3
	10	11.416	0.171512	0.1108		-0.1108	0.0607118	0.1108	0.0607118	0.0122768	0.00368593		0	0	0	1	3
	11	15.095	0.223492	0.125707		-0.125707	0.0977848	0.125707	0.0977848	0.0158023	0.00956188		0	0	1	0	3
	12	0.131	0.186524	-0.0692698		0.0692698	0.255793	0.0692698	0.255793	0.0047983	0.0654303		0	0	1	0	3
	13	0.829	0.369875	-0.0146219		0.0146219	0.384497	0.0146219	0.384497	0.000213801	0.147838		0	0	1	0	3
	14	23.077	0.129674	0.00278979		-0.00278979	0.126884	0.00278979	0.126884	7.7829e-06	0.0160996		0	0	1	0	3
	15	27.492	0.488766	0.0829869		-0.0829869	0.40578	0.0829869	0.40578	0.00688683	0.164657		0	0	0	1	3
	16	26.812	0.562391	0.0821412		-0.0821412	0.48025	0.0821412	0.48025	0.00674718	0.23064		0	0	0	1	3
	17	26.379	0.39617	0.0827847		-0.0827847	0.313385	0.0827847	0.313385	0.0068533	0.0982104		0	0	0	1	3
	45	116.057	2.00717	0.362153		-0.362153	1.64501	0.362153	1.64501	0.131155	2.70607		1	0	0	0	1
	47	0.169	0.191103	-0.0691566		0.0691566	0.26026	0.0691566	0.26026	0.00478263	0.0677351		0	0	1	0	3
	51	0.842	0.373087	-0.0148644		0.0148644	0.387951	0.0148644	0.387951	0.00022095	0.150506		0	0	1	0	3
	55	23.1	0.129586	0.00268704		-0.00268704	0.126899	0.00268704	0.126899	7.2202e-06	0.0161034		0	0	1	0	3
	56	27.498	0.487588	0.0829155		-0.0829155	0.404673	0.0829155	0.404673	0.00687498	0.16376		0	0	0	1	3
	60	26.826	0.56331	0.0822169		-0.0822169	0.481093	0.0822169	0.481093	0.00675961	0.231451		0	0	0	1	3
	64	26.386	0.396782	0.0827191		-0.0827191	0.314063	0.0827191	0.314063	0.00684245	0.0986356		0	0	0	1	3
	68	133.504	2.16576	0.436218		-0.436218	1.72954	0.436218	1.72954	0.190286	2.99131		0	1	0	0	2
	69	129.802	0.171429	0.304275		-0.304275	-0.132845	0.304275	0.132845	0.0925831	0.0176479		0	0	1	0	3
	70	16.002	0.412469	0.129063		-0.129063	0.283406	0.129063	0.283406	0.0166573	0.080319		0	0	1	0	3
	74	130.564	0.171452	0.30896		-0.30896	-0.137508	0.30896	0.137508	0.0954562	0.0189084		0	0	1	0	3
	75	130.164	1.99834	0.422343		-0.422343	1.576	0.422343	1.576	0.178374	2.48377		0	1	0	0	2
	76	11.399	0.171512	0.110647		-0.110647	0.0608654	0.110647	0.0608654	0.0122427	0.0037046		0	0	0	1	3
	80	15.142	0.217463	0.125204		-0.125204	0.0922588	0.125204	0.0922588	0.0156761	0.00851169		0	0	1	0	3
	84	11.508	0.171512	0.114134		-0.114134	0.0573788	0.114134	0.0573788	0.0130265	0.00329233		0	0	0	1	3
SnMe4	2	-7.504	-1.08657	-1.44783		1.44783	0.361262	1.44783	0.361262	2.09621	0.13051		1	0	0	0	1
	6	-7.437	-1.19187	-1.45029		1.45029	0.25842	1.45029	0.25842	2.10334	0.0667811		1	0	0	0	1
	10	-7.434	-1.11051	-1.44849		1.44849	0.33798	1.44849	0.33798	2.09811	0.11423		1	0	0	0	1
	14	-7.505	-1.06421	-1.44814		1.44814	0.383924	1.44814	0.383924	2.0971	0.147398		1	0	0	0	1
						All nuclei		Category 1		Category 2		Category 3
						SR	SR+ML	SR	SR+ML	SR	SR+ML	SR	SR+ML
					MD	-0.424143	0.263879	-2.75414	0.343882	-0.589406	0.215883	-0.126525	0.268372
					MAD	0.837339	0.766303	3.43183	2.13015	1.46734	1.3076	0.383688	0.470236
					RMSD	2.60941	2.04933	6.78613	3.7592	2.99751	2.72973	1.40106	1.49429

## Sheet: SnS51 H
SnS51 Benchmark set for 1H NMR (Figure S9)
						Deviation		Absolute deviation		Squared deviation			# HAs in … bonding sphere
Compound	Atom (H)	δ(DFT,SR)	ΔSOδ (ML)	ΔSOδ (true)		SR	SR+ML	SR	SR+ML	SR	SR+ML		1	2	3	4	5	Category
2	22	2.469	0.111554	1.22593		-1.22593	-1.11438	1.22593	1.11438	1.50291	1.24183		0	0	1	0	0	2
	23	2.092	0.0105706	0.0704024		-0.0704024	-0.0598318	0.0704024	0.0598318	0.0049565	0.00357985		0	0	1	0	0	2
	24	2.097	0.010279	0.0705371		-0.0705371	-0.0602581	0.0705371	0.0602581	0.00497548	0.00363104		0	0	1	0	0	2
	25	2.465	0.111133	1.22638		-1.22638	-1.11524	1.22638	1.11524	1.504	1.24377		0	0	1	0	0	2
	26	-0.18	-0.0154124	-0.0838094		0.0838094	0.068397	0.0838094	0.068397	0.00702401	0.00467815		0	0	0	1	0	3
	27	-0.032	-0.0090065	0.0363529		-0.0363529	-0.0453594	0.0363529	0.0453594	0.00132153	0.00205747		0	0	0	1	0	3
	28	-0.22	-0.00163415	-0.52884		0.52884	0.527206	0.52884	0.527206	0.279672	0.277946		0	0	0	1	0	3
	29	0.378	0.00172954	0.0367908		-0.0367908	-0.0350613	0.0367908	0.0350613	0.00135357	0.0012293		0	0	0	1	0	3
	30	0.839	-0.0168969	0.0266578		-0.0266578	-0.0435547	0.0266578	0.0435547	0.000710638	0.00189701		0	0	0	1	0	3
	31	0.936	0.0110041	0.012305		-0.012305	-0.00130099	0.012305	0.00130099	0.000151414	1.69259e-06		0	0	0	1	0	3
	32	-0.316	0.00875662	-0.0100951		0.0100951	0.0188517	0.0100951	0.0188517	0.00010191	0.000355386		0	0	0	1	0	3
	33	0.197	-0.0181351	-0.0143427		0.0143427	-0.00379244	0.0143427	0.00379244	0.000205712	1.43826e-05		0	0	0	1	0	3
	34	0.174	0.00998111	-0.0254848		0.0254848	0.0354659	0.0254848	0.0354659	0.000649474	0.00125783		0	0	0	1	0	3
	35	0.332	-0.0321001	0.00299673		-0.00299673	-0.0350968	0.00299673	0.0350968	8.98038e-06	0.00123179		0	0	0	1	0	3
	36	-0.119	-0.00227065	0.0139899		-0.0139899	-0.0162605	0.0139899	0.0162605	0.000195716	0.000264405		0	0	0	1	0	3
	37	-0.158	0.00281064	-0.0134594		0.0134594	0.01627	0.0134594	0.01627	0.000181154	0.000264713		0	0	0	1	0	3
	38	-0.37	-0.0138741	-0.0376142		0.0376142	0.0237401	0.0376142	0.0237401	0.00141483	0.000563594		0	0	0	1	0	3
	39	0.718	-0.0111023	0.0284359		-0.0284359	-0.0395383	0.0284359	0.0395383	0.000808603	0.00156327		0	0	0	1	0	3
	40	0.06	0.0104886	-0.11294		0.11294	0.123429	0.11294	0.123429	0.0127555	0.0152347		0	0	0	1	0	3
	41	-0.113	0.00634611	0.0813647		-0.0813647	-0.0750186	0.0813647	0.0750186	0.00662021	0.00562779		0	0	0	1	0	3
	42	0.524	0.0137867	0.000693613		-0.000693613	0.0130931	0.000693613	0.0130931	4.81099e-07	0.00017143		0	0	0	1	0	3
	43	0.237	-0.00089521	-0.0312952		0.0312952	0.0304	0.0312952	0.0304	0.000979389	0.000924159		0	0	0	1	0	3
	44	0.336	-0.0314781	0.00296134		-0.00296134	-0.0344394	0.00296134	0.0344394	8.76951e-06	0.00118607		0	0	0	1	0	3
	45	-0.155	0.00296583	-0.0135118		0.0135118	0.0164776	0.0135118	0.0164776	0.000182569	0.000271512		0	0	0	1	0	3
	46	-0.115	-0.00226043	0.0140514		-0.0140514	-0.0163118	0.0140514	0.0163118	0.000197441	0.000266075		0	0	0	1	0	3
	47	0.527	0.0141793	0.000647845		-0.000647845	0.0135315	0.000647845	0.0135315	4.19703e-07	0.0001831		0	0	0	1	0	3
	48	0.234	-0.000674106	-0.031273		0.031273	0.0305989	0.031273	0.0305989	0.000978003	0.000936294		0	0	0	1	0	3
	49	-0.109	0.00638545	0.0812733		-0.0812733	-0.0748878	0.0812733	0.0748878	0.00660535	0.00560819		0	0	0	1	0	3
	50	0.728	-0.01106	0.0283551		-0.0283551	-0.0394151	0.0283551	0.0394151	0.000804014	0.00155355		0	0	0	1	0	3
	51	0.071	0.0105401	-0.112185		0.112185	0.122725	0.112185	0.122725	0.0125855	0.0150615		0	0	0	1	0	3
	52	-0.359	-0.0138407	-0.0379905		0.0379905	0.0241498	0.0379905	0.0241498	0.00144328	0.000583214		0	0	0	1	0	3
	53	-0.179	-0.0154794	-0.0828654		0.0828654	0.067386	0.0828654	0.067386	0.00686667	0.00454087		0	0	0	1	0	3
	54	-0.034	-0.0089933	0.0357713		-0.0357713	-0.0447646	0.0357713	0.0447646	0.00127959	0.00200387		0	0	0	1	0	3
	55	-0.223	-0.00164142	-0.531501		0.531501	0.529859	0.531501	0.529859	0.282493	0.280751		0	0	0	1	0	3
	56	0.837	-0.0170775	0.0266291		-0.0266291	-0.0437066	0.0266291	0.0437066	0.00070911	0.00191027		0	0	0	1	0	3
	57	0.377	0.00160443	0.0369976		-0.0369976	-0.0353932	0.0369976	0.0353932	0.00136882	0.00125268		0	0	0	1	0	3
	58	0.937	0.0106963	0.0123256		-0.0123256	-0.00162925	0.0123256	0.00162925	0.00015192	2.65447e-06		0	0	0	1	0	3
	59	-0.326	0.00874964	-0.0102426		0.0102426	0.0189923	0.0102426	0.0189923	0.000104911	0.000360706		0	0	0	1	0	3
	60	0.197	-0.0183264	-0.0142389		0.0142389	-0.0040875	0.0142389	0.0040875	0.000202747	1.67076e-05		0	0	0	1	0	3
	61	0.168	0.0101323	-0.0254243		0.0254243	0.0355566	0.0254243	0.0355566	0.000646396	0.00126427		0	0	0	1	0	3
3	28	0.432	0.0287909	0.0241961		-0.0241961	0.00459478	0.0241961	0.00459478	0.00058545	2.1112e-05		0	0	0	1	0	3
	29	0.304	0.0142273	-0.00106983		0.00106983	0.0152971	0.00106983	0.0152971	1.14455e-06	0.000234001		0	0	0	1	0	3
	30	-0.086	-0.00759248	0.0089683		-0.0089683	-0.0165608	0.0089683	0.0165608	8.04304e-05	0.000274259		0	0	0	1	0	3
	31	0.241	0.0297526	-0.0196299		0.0196299	0.0493825	0.0196299	0.0493825	0.000385333	0.00243863		0	0	0	1	0	3
	32	0.358	0.00874218	-0.0484157		0.0484157	0.0571579	0.0484157	0.0571579	0.00234408	0.00326702		0	0	0	1	0	3
	33	-0.099	-0.00183493	0.238987		-0.238987	-0.240822	0.238987	0.240822	0.0571148	0.0579952		0	0	0	1	0	3
	34	0.431	0.00842277	-0.0168076		0.0168076	0.0252303	0.0168076	0.0252303	0.000282495	0.00063657		0	0	0	1	0	3
	35	0.735	0.0123707	0.0130031		-0.0130031	-0.000632375	0.0130031	0.000632375	0.000169081	3.99898e-07		0	0	0	1	0	3
	36	-0.117	-0.0095813	0.050275		-0.050275	-0.0598563	0.050275	0.0598563	0.00252758	0.00358278		0	0	0	1	0	3
	37	0.007	-0.0122323	-0.347515		0.347515	0.335283	0.347515	0.335283	0.120767	0.112414		0	0	0	1	0	3
	38	0.735	-0.0116985	0.0509045		-0.0509045	-0.062603	0.0509045	0.062603	0.00259127	0.00391914		0	0	0	1	0	3
	39	-0.262	-0.00989937	-0.0377398		0.0377398	0.0278404	0.0377398	0.0278404	0.00142429	0.000775087		0	0	0	1	0	3
	40	-0.108	-0.0097582	-0.00897246		0.00897246	-0.000785744	0.00897246	0.000785744	8.0505e-05	6.17394e-07		0	0	0	1	0	3
	41	0.152	0.0109684	0.0165682		-0.0165682	-0.00559977	0.0165682	0.00559977	0.000274505	3.13575e-05		0	0	0	1	0	3
	42	0.51	-0.0013494	-0.00420727		0.00420727	0.00285787	0.00420727	0.00285787	1.77011e-05	8.16744e-06		0	0	0	1	0	3
	43	-0.368	-0.00842208	-0.00639063		0.00639063	-0.00203145	0.00639063	0.00203145	4.08402e-05	4.1268e-06		0	0	0	1	0	3
	44	0.083	-0.0190193	-0.0342587		0.0342587	0.0152394	0.0342587	0.0152394	0.00117366	0.000232238		0	0	0	1	0	3
	45	0.098	-0.0048556	-0.387357		0.387357	0.382502	0.387357	0.382502	0.150046	0.146308		0	0	0	1	0	3
	46	0.11	-0.0130245	0.0079075		-0.0079075	-0.020932	0.0079075	0.020932	6.25285e-05	0.000438149		0	0	0	1	0	3
	47	1.111	-0.0136997	0.0370108		-0.0370108	-0.0507105	0.0370108	0.0507105	0.0013698	0.00257155		0	0	0	1	0	3
	48	0.67	0.00826252	0.00737492		-0.00737492	0.000887592	0.00737492	0.000887592	5.43895e-05	7.87819e-07		0	0	0	1	0	3
	49	0.655	-0.000685334	-0.0236076		0.0236076	0.0229222	0.0236076	0.0229222	0.000557317	0.000525429		0	0	0	1	0	3
	50	-0.024	-0.0226862	0.050056		-0.050056	-0.0727422	0.050056	0.0727422	0.00250561	0.00529143		0	0	0	1	0	3
	51	0.521	0.0131357	0.00139946		-0.00139946	0.0117362	0.00139946	0.0117362	1.9585e-06	0.000137739		0	0	0	1	0	3
	52	1.238	-0.0434536	0.0510808		-0.0510808	-0.0945344	0.0510808	0.0945344	0.00260925	0.00893676		0	0	0	1	0	3
	53	0.767	-0.0971925	0.00167573		-0.00167573	-0.0988683	0.00167573	0.0988683	2.80805e-06	0.00977494		0	0	0	1	0	3
	54	1.176	-0.0433766	0.0511642		-0.0511642	-0.0945408	0.0511642	0.0945408	0.00261778	0.00893797		0	0	0	1	0	3
	55	0.708	-0.0911647	0.00194077		-0.00194077	-0.0931055	0.00194077	0.0931055	3.76657e-06	0.00866864		0	0	0	1	0	3
	56	0.493	0.0314144	0.0238593		-0.0238593	0.00755509	0.0238593	0.00755509	0.000569266	5.70794e-05		0	0	0	1	0	3
	57	0.264	0.0120361	-0.000213137		0.000213137	0.0122492	0.000213137	0.0122492	4.54274e-08	0.000150043		0	0	0	1	0	3
	58	-0.023	-0.00963724	0.011624		-0.011624	-0.0212612	0.011624	0.0212612	0.000135118	0.00045204		0	0	0	1	0	3
	59	-0.076	-0.00385765	0.235758		-0.235758	-0.239615	0.235758	0.239615	0.0555817	0.0574156		0	0	0	1	0	3
	60	0.249	0.0304377	-0.0195791		0.0195791	0.0500167	0.0195791	0.0500167	0.000383339	0.00250167		0	0	0	1	0	3
	61	0.408	0.00925011	-0.0481415		0.0481415	0.0573917	0.0481415	0.0573917	0.00231761	0.0032938		0	0	0	1	0	3
	62	0.556	0.000758544	-0.00373025		0.00373025	0.0044888	0.00373025	0.0044888	1.39148e-05	2.01493e-05		0	0	0	1	0	3
	63	0.051	-0.00955878	-0.0086047		0.0086047	-0.000954078	0.0086047	0.000954078	7.40409e-05	9.10264e-07		0	0	0	1	0	3
	64	0.111	0.00901469	0.0173662		-0.0173662	-0.00835154	0.0173662	0.00835154	0.000301586	6.97482e-05		0	0	0	1	0	3
	65	-0.139	-0.0101826	-0.0403572		0.0403572	0.0301746	0.0403572	0.0301746	0.0016287	0.000910506		0	0	0	1	0	3
	66	0.139	-0.0133544	-0.343352		0.343352	0.329998	0.343352	0.329998	0.117891	0.108899		0	0	0	1	0	3
	67	0.776	-0.0115039	0.0511807		-0.0511807	-0.0626846	0.0511807	0.0626846	0.00261946	0.00392936		0	0	0	1	0	3
	68	0.536	0.00866318	-0.0172999		0.0172999	0.0259631	0.0172999	0.0259631	0.000299287	0.000674082		0	0	0	1	0	3
	69	0.774	0.00980902	0.0128225		-0.0128225	-0.00301353	0.0128225	0.00301353	0.000164418	9.08136e-06		0	0	0	1	0	3
	70	-0.057	-0.00801728	0.0496192		-0.0496192	-0.0576365	0.0496192	0.0576365	0.00246206	0.00332196		0	0	0	1	0	3
	71	-0.218	-0.00845631	0.0113306		-0.0113306	-0.0197869	0.0113306	0.0197869	0.000128383	0.000391522		0	0	0	1	0	3
	72	0.037	-0.0194732	-0.0645474		0.0645474	0.0450742	0.0645474	0.0450742	0.00416637	0.00203169		0	0	0	1	0	3
	73	-0.006	-0.00405312	-0.369517		0.369517	0.365464	0.369517	0.365464	0.136543	0.133564		0	0	0	1	0	3
	74	0.445	0.00998522	0.000755995		-0.000755995	0.00922923	0.000755995	0.00922923	5.71529e-07	8.51787e-05		0	0	0	1	0	3
	75	0.46	-0.00248782	-0.024091		0.024091	0.0216032	0.024091	0.0216032	0.000580379	0.000466699		0	0	0	1	0	3
	76	-0.127	-0.0233755	0.0504941		-0.0504941	-0.0738696	0.0504941	0.0738696	0.00254965	0.00545672		0	0	0	1	0	3
	77	0.188	-0.0139856	0.00760916		-0.00760916	-0.0215948	0.00760916	0.0215948	5.78994e-05	0.000466336		0	0	0	1	0	3
	78	1.096	-0.0137024	0.0364474		-0.0364474	-0.0501498	0.0364474	0.0501498	0.00132841	0.002515		0	0	0	1	0	3
	79	0.976	0.0116381	0.00767291		-0.00767291	0.00396522	0.00767291	0.00396522	5.88736e-05	1.57229e-05		0	0	0	1	0	3
4	5	6.984	0.120154	0.194033		-0.194033	-0.0738786	0.194033	0.0738786	0.0376487	0.00545804		0	0	0	1	0	3
	7	7.313	0.0259769	0.0439347		-0.0439347	-0.0179578	0.0439347	0.0179578	0.00193026	0.000322484		0	0	0	0	1	3
	9	6.569	0.0307241	0.144413		-0.144413	-0.113689	0.144413	0.113689	0.0208551	0.0129252		0	0	0	1	0	3
	14	7.422	0.0701481	0.0368221		-0.0368221	0.033326	0.0368221	0.033326	0.00135587	0.00111062		0	0	0	0	0	3
	16	7.833	0.0506163	0.0188513		-0.0188513	0.0317651	0.0188513	0.0317651	0.00035537	0.00100902		0	0	0	0	0	3
	18	7.578	0.0630018	0.0273705		-0.0273705	0.0356313	0.0273705	0.0356313	0.000749143	0.00126959		0	0	0	0	0	3
	21	2.142	0.0606902	-0.0780102		0.0780102	0.1387	0.0780102	0.1387	0.00608559	0.0192378		0	0	0	0	0	3
	23	0.538	-0.0101509	-0.0315455		0.0315455	0.0213945	0.0315455	0.0213945	0.000995116	0.000457727		0	0	0	0	0	3
	24	0.421	-0.00952327	-0.00890107		0.00890107	-0.000622201	0.00890107	0.000622201	7.92291e-05	3.87134e-07		0	0	0	0	0	3
	25	0.003	-0.0112473	-0.00961445		0.00961445	-0.00163288	0.00961445	0.00163288	9.24376e-05	2.6663e-06		0	0	0	0	0	3
	27	0.872	-0.00508294	0.0182735		-0.0182735	-0.0233564	0.0182735	0.0233564	0.000333919	0.000545522		0	0	0	0	0	3
	28	-1.015	-0.00747522	-0.0130485		0.0130485	0.00557329	0.0130485	0.00557329	0.000170264	3.10615e-05		0	0	0	0	0	3
	29	0.247	-0.0103572	-0.00705767		0.00705767	-0.00329949	0.00705767	0.00329949	4.98107e-05	1.08867e-05		0	0	0	0	0	3
	31	2.764	0.0295541	0.00626706		-0.00626706	0.023287	0.00626706	0.023287	3.92761e-05	0.000542285		0	0	0	0	0	3
	33	1.284	-0.00557536	0.00274438		-0.00274438	-0.00831974	0.00274438	0.00831974	7.53162e-06	6.92181e-05		0	0	0	0	0	3
	34	0.786	-0.00684867	0.00501471		-0.00501471	-0.0118634	0.00501471	0.0118634	2.51474e-05	0.00014074		0	0	0	0	0	3
	35	1.045	0.0100724	0.017909		-0.017909	-0.00783661	0.017909	0.00783661	0.000320731	6.14124e-05		0	0	0	0	0	3
	37	0.991	-0.00956028	-0.00412734		0.00412734	-0.00543294	0.00412734	0.00543294	1.70349e-05	2.95168e-05		0	0	0	0	0	3
	38	1.252	-0.0108386	-0.0060288		0.0060288	-0.00480983	0.0060288	0.00480983	3.63464e-05	2.31345e-05		0	0	0	0	0	3
	39	0.932	-0.00987104	-0.00365951		0.00365951	-0.00621154	0.00365951	0.00621154	1.3392e-05	3.85832e-05		0	0	0	0	0	3
	43	7.508	0.0522549	0.0275747		-0.0275747	0.0246802	0.0275747	0.0246802	0.000760363	0.000609112		0	0	0	0	0	3
	45	7.62	0.0474453	0.0156255		-0.0156255	0.0318197	0.0156255	0.0318197	0.000244158	0.0010125		0	0	0	0	0	3
	47	7.236	0.0618803	0.01841		-0.01841	0.0434703	0.01841	0.0434703	0.000338928	0.00188967		0	0	0	0	0	3
	50	2.991	0.000313744	-0.00559549		0.00559549	0.00590923	0.00559549	0.00590923	3.13095e-05	3.4919e-05		0	0	0	0	0	3
	52	0.826	-0.0107974	-0.0168783		0.0168783	0.00608092	0.0168783	0.00608092	0.000284878	3.69776e-05		0	0	0	0	0	3
	53	0.916	-0.01048	-0.00267813		0.00267813	-0.00780188	0.00267813	0.00780188	7.1724e-06	6.08693e-05		0	0	0	0	0	3
	54	0.98	-0.0081376	0.000187058		-0.000187058	-0.00832466	0.000187058	0.00832466	3.49907e-08	6.92999e-05		0	0	0	0	0	3
	56	-1.17	0.000341259	0.00568628		-0.00568628	-0.00534502	0.00568628	0.00534502	3.23338e-05	2.85692e-05		0	0	0	0	0	3
	57	-0.694	0.0245983	-0.0318922		0.0318922	0.0564904	0.0318922	0.0564904	0.00101711	0.00319117		0	0	0	0	0	3
	58	0.267	-0.00602382	-0.000347337		0.000347337	-0.00567648	0.000347337	0.00567648	1.20643e-07	3.22224e-05		0	0	0	0	0	3
	60	3.275	0.0566038	-0.00124213		0.00124213	0.057846	0.00124213	0.057846	1.54288e-06	0.00334615		0	0	0	0	0	3
	62	0.771	-0.00925712	-0.00890073		0.00890073	-0.000356389	0.00890073	0.000356389	7.92229e-05	1.27013e-07		0	0	0	0	0	3
	63	0.456	-0.0101591	-0.00765481		0.00765481	-0.00250434	0.00765481	0.00250434	5.85961e-05	6.27172e-06		0	0	0	0	0	3
	64	1.077	-0.0109376	0.000470996		-0.000470996	-0.0114086	0.000470996	0.0114086	2.21837e-07	0.000130157		0	0	0	0	0	3
	66	1.44	-0.0109019	0.00452744		-0.00452744	-0.0154294	0.00452744	0.0154294	2.04977e-05	0.000238065		0	0	0	0	0	3
	67	1.354	-0.00929268	0.00137348		-0.00137348	-0.0106662	0.00137348	0.0106662	1.88645e-06	0.000113767		0	0	0	0	0	3
	68	0.737	-0.00996321	-0.00932145		0.00932145	-0.000641758	0.00932145	0.000641758	8.68894e-05	4.11854e-07		0	0	0	0	0	3
	72	6.86	0.108393	0.193998		-0.193998	-0.0856048	0.193998	0.0856048	0.0376353	0.00732818		0	0	0	1	0	3
	74	7.315	0.0242231	0.0440119		-0.0440119	-0.0197888	0.0440119	0.0197888	0.00193705	0.000391595		0	0	0	0	1	3
	76	6.537	0.0307455	0.145116		-0.145116	-0.11437	0.145116	0.11437	0.0210586	0.0130806		0	0	0	1	0	3
	81	7.421	0.0686424	0.0368154		-0.0368154	0.031827	0.0368154	0.031827	0.00135537	0.00101296		0	0	0	0	0	3
	83	7.912	0.0516487	0.0188284		-0.0188284	0.0328203	0.0188284	0.0328203	0.000354508	0.00107717		0	0	0	0	0	3
	85	7.525	0.0629132	0.0273751		-0.0273751	0.0355381	0.0273751	0.0355381	0.000749397	0.00126295		0	0	0	0	0	3
	88	2.079	0.0609824	-0.0777856		0.0777856	0.138768	0.0777856	0.138768	0.0060506	0.0192566		0	0	0	0	0	3
	90	0.368	-0.0101238	-0.0314829		0.0314829	0.0213591	0.0314829	0.0213591	0.000991173	0.000456211		0	0	0	0	0	3
	91	0.335	-0.00933115	-0.008932		0.008932	-0.00039915	0.008932	0.00039915	7.97806e-05	1.59321e-07		0	0	0	0	0	3
	92	0.465	-0.0112291	-0.00957767		0.00957767	-0.00165146	0.00957767	0.00165146	9.17317e-05	2.72732e-06		0	0	0	0	0	3
	94	-1.186	-0.0070828	-0.0129803		0.0129803	0.00589746	0.0129803	0.00589746	0.000168487	3.47801e-05		0	0	0	0	0	3
	95	0.067	-0.0104334	-0.00719737		0.00719737	-0.00323604	0.00719737	0.00323604	5.18021e-05	1.0472e-05		0	0	0	0	0	3
	96	0.694	-0.00561435	0.0182122		-0.0182122	-0.0238265	0.0182122	0.0238265	0.000331683	0.000567703		0	0	0	0	0	3
	98	2.946	0.0297899	0.00634865		-0.00634865	0.0234413	0.00634865	0.0234413	4.03053e-05	0.000549493		0	0	0	0	0	3
	100	0.968	0.00765803	0.0180177		-0.0180177	-0.0103597	0.0180177	0.0103597	0.000324639	0.000107324		0	0	0	0	0	3
	101	1.226	-0.00562359	0.00276654		-0.00276654	-0.00839014	0.00276654	0.00839014	7.65376e-06	7.03944e-05		0	0	0	0	0	3
	102	0.882	-0.00681219	0.00509757		-0.00509757	-0.0119098	0.00509757	0.0119098	2.59852e-05	0.000141842		0	0	0	0	0	3
	104	1.255	-0.0108437	-0.00602554		0.00602554	-0.00481815	0.00602554	0.00481815	3.63071e-05	2.32145e-05		0	0	0	0	0	3
	105	0.967	-0.00956705	-0.003627		0.003627	-0.00594005	0.003627	0.00594005	1.31552e-05	3.52842e-05		0	0	0	0	0	3
	106	0.846	-0.00992953	-0.00409513		0.00409513	-0.0058344	0.00409513	0.0058344	1.67701e-05	3.40403e-05		0	0	0	0	0	3
	110	7.543	0.0553849	0.0276011		-0.0276011	0.0277837	0.0276011	0.0277837	0.000761823	0.000771936		0	0	0	0	0	3
	112	7.643	0.0444943	0.0156516		-0.0156516	0.0288427	0.0156516	0.0288427	0.000244972	0.000831904		0	0	0	0	0	3
	114	7.395	0.0633482	0.0184176		-0.0184176	0.0449306	0.0184176	0.0449306	0.000339208	0.00201876		0	0	0	0	0	3
	117	2.817	-0.000841402	-0.00549726		0.00549726	0.00465586	0.00549726	0.00465586	3.02199e-05	2.1677e-05		0	0	0	0	0	3
	119	0.923	-0.00784999	0.000143031		-0.000143031	-0.00799302	0.000143031	0.00799302	2.04578e-08	6.38884e-05		0	0	0	0	0	3
	120	0.967	-0.0107667	-0.016863		0.016863	0.00609633	0.016863	0.00609633	0.000284361	3.71652e-05		0	0	0	0	0	3
	121	1.227	-0.00997693	-0.00269486		0.00269486	-0.00728207	0.00269486	0.00728207	7.26226e-06	5.30286e-05		0	0	0	0	0	3
	123	-0.865	0.0219438	-0.0316736		0.0316736	0.0536173	0.0316736	0.0536173	0.00100321	0.00287482		0	0	0	0	0	3
	124	0.192	-0.00631586	-0.000304399		0.000304399	-0.00601146	0.000304399	0.00601146	9.26584e-08	3.61376e-05		0	0	0	0	0	3
	125	-1.127	0.000621624	0.00598842		-0.00598842	-0.00536679	0.00598842	0.00536679	3.58612e-05	2.88025e-05		0	0	0	0	0	3
	127	3.048	0.055358	-0.00173645		0.00173645	0.0570945	0.00173645	0.0570945	3.01525e-06	0.00325978		0	0	0	0	0	3
	129	0.77	-0.00918546	-0.00885124		0.00885124	-0.000334217	0.00885124	0.000334217	7.83444e-05	1.11701e-07		0	0	0	0	0	3
	130	0.541	-0.0100793	-0.00773846		0.00773846	-0.00234084	0.00773846	0.00234084	5.98837e-05	5.47955e-06		0	0	0	0	0	3
	131	1.084	-0.0109404	0.000439886		-0.000439886	-0.0113803	0.000439886	0.0113803	1.93499e-07	0.000129511		0	0	0	0	0	3
	133	1.388	-0.00910179	0.00155941		-0.00155941	-0.0106612	0.00155941	0.0106612	2.43177e-06	0.000113661		0	0	0	0	0	3
	134	0.577	-0.0100843	-0.00941839		0.00941839	-0.000665935	0.00941839	0.000665935	8.87061e-05	4.43469e-07		0	0	0	0	0	3
	135	1.608	-0.0109547	0.00450325		-0.00450325	-0.0154579	0.00450325	0.0154579	2.02792e-05	0.000238948		0	0	0	0	0	3
11	3	8.813	0.60338	0.312326		-0.312326	0.291055	0.312326	0.291055	0.0975473	0.0847127		0	0	1	0	0	2
	5	6.825	0.0616742	0.0859428		-0.0859428	-0.0242686	0.0859428	0.0242686	0.00738616	0.000588963		0	0	0	1	0	3
	7	8.851	0.592658	0.310357		-0.310357	0.282301	0.310357	0.282301	0.0963215	0.0796936		0	0	1	0	0	2
	12	7.638	0.0270262	0.0346729		-0.0346729	-0.0076467	0.0346729	0.0076467	0.00120221	5.8472e-05		0	0	0	1	0	3
	14	7.73	0.0189658	0.0016376		-0.0016376	0.0173281	0.0016376	0.0173281	2.68174e-06	0.000300265		0	0	0	0	1	3
	16	7.54	0.0313509	0.0385161		-0.0385161	-0.00716522	0.0385161	0.00716522	0.00148349	5.13404e-05		0	0	0	1	0	3
	18	7.975	0.0781258	-0.00504385		0.00504385	0.0831696	0.00504385	0.0831696	2.54405e-05	0.00691719		0	0	1	0	0	2
	20	2.634	-0.0111523	-0.00549265		0.00549265	-0.00565965	0.00549265	0.00565965	3.01692e-05	3.20316e-05		0	0	0	1	0	3
	21	2.856	-0.011563	-0.00738459		0.00738459	-0.00417845	0.00738459	0.00417845	5.45322e-05	1.74595e-05		0	0	0	1	0	3
	22	2.489	-0.0106287	-0.0344723		0.0344723	0.0238436	0.0344723	0.0238436	0.00118834	0.000568517		0	0	0	1	0	3
	24	1.257	-0.0862389	-0.0165984		0.0165984	-0.0696404	0.0165984	0.0696404	0.000275508	0.00484979		0	0	0	1	0	3
	26	0.99	-0.0116243	-0.0119734		0.0119734	0.000349151	0.0119734	0.000349151	0.000143363	1.21906e-07		0	0	0	0	1	3
	27	1.158	-0.00994269	-0.00784074		0.00784074	-0.00210195	0.00784074	0.00210195	6.14772e-05	4.41819e-06		0	0	0	0	1	3
	28	0.761	-0.00410091	-0.0050234		0.0050234	0.000922485	0.0050234	0.000922485	2.52345e-05	8.50979e-07		0	0	0	0	1	3
	30	0.963	-0.00308236	0.00454835		-0.00454835	-0.00763071	0.00454835	0.00763071	2.06875e-05	5.82277e-05		0	0	0	0	1	3
	31	0.986	-0.010708	0.00123989		-0.00123989	-0.0119478	0.00123989	0.0119478	1.53734e-06	0.000142751		0	0	0	0	1	3
	32	0.652	-0.0112598	-0.00656305		0.00656305	-0.00469672	0.00656305	0.00469672	4.30736e-05	2.20591e-05		0	0	0	0	1	3
	34	1.754	-0.0486314	-0.00955659		0.00955659	-0.0390748	0.00955659	0.0390748	9.13283e-05	0.00152684		0	0	0	1	0	3
	36	0.805	-0.010832	-0.00857372		0.00857372	-0.00225826	0.00857372	0.00225826	7.35086e-05	5.09976e-06		0	0	0	0	1	3
	37	1.387	-0.0108571	-0.00317429		0.00317429	-0.00768277	0.00317429	0.00768277	1.00761e-05	5.9025e-05		0	0	0	0	1	3
	38	1.215	-0.00469194	0.004321		-0.004321	-0.00901294	0.004321	0.00901294	1.8671e-05	8.12331e-05		0	0	0	0	1	3
	40	1.015	0.000279412	0.00930069		-0.00930069	-0.00902128	0.00930069	0.00902128	8.65028e-05	8.13835e-05		0	0	0	0	1	3
	41	1.651	-0.0115246	0.00371828		-0.00371828	-0.0152429	0.00371828	0.0152429	1.38256e-05	0.000232345		0	0	0	0	1	3
	42	0.886	-0.0102387	-0.00754938		0.00754938	-0.00268936	0.00754938	0.00268936	5.69931e-05	7.23264e-06		0	0	0	0	1	3
	44	1.028	-0.0100337	0.0203821		-0.0203821	-0.0304158	0.0203821	0.0304158	0.000415429	0.000925121		0	0	0	1	0	3
	46	0.678	-0.00948384	-0.00380635		0.00380635	-0.00567749	0.00380635	0.00567749	1.44883e-05	3.22339e-05		0	0	0	0	1	3
	47	1.258	-0.0109036	-0.00100831		0.00100831	-0.00989529	0.00100831	0.00989529	1.01669e-06	9.79168e-05		0	0	0	0	1	3
	48	0.822	-0.0103252	-0.00522748		0.00522748	-0.00509769	0.00522748	0.00509769	2.73266e-05	2.59865e-05		0	0	0	0	1	3
	50	0.968	-0.0101871	0.000394754		-0.000394754	-0.0105819	0.000394754	0.0105819	1.5583e-07	0.000111977		0	0	0	0	1	3
	51	1.526	-0.0113466	0.00131859		-0.00131859	-0.0126652	0.00131859	0.0126652	1.73867e-06	0.000160406		0	0	0	0	1	3
	52	0.865	-0.0105393	-0.00152557		0.00152557	-0.00901376	0.00152557	0.00901376	2.32737e-06	8.12478e-05		0	0	0	0	1	3
	54	1.223	-0.0895915	-0.00620358		0.00620358	-0.0833879	0.00620358	0.0833879	3.84845e-05	0.00695355		0	0	0	1	0	3
	56	0.973	-0.00358213	-0.00564797		0.00564797	0.00206584	0.00564797	0.00206584	3.18996e-05	4.26769e-06		0	0	0	0	1	3
	57	1.448	-0.00970992	-0.00822151		0.00822151	-0.0014884	0.00822151	0.0014884	6.75933e-05	2.21535e-06		0	0	0	0	1	3
	58	0.967	-0.0115571	-0.0115429		0.0115429	-1.42151e-05	0.0115429	1.42151e-05	0.000133238	2.0207e-10		0	0	0	0	1	3
	60	0.673	-0.01127	-0.00151393		0.00151393	-0.00975604	0.00151393	0.00975604	2.29198e-06	9.51804e-05		0	0	0	0	1	3
	61	1.04	-0.0107676	0.00280002		-0.00280002	-0.0135676	0.00280002	0.0135676	7.84014e-06	0.000184079		0	0	0	0	1	3
	62	0.882	-0.00317556	0.00877525		-0.00877525	-0.0119508	0.00877525	0.0119508	7.7005e-05	0.000142822		0	0	0	0	1	3
	64	1.582	-0.0693109	-0.00905985		0.00905985	-0.060251	0.00905985	0.060251	8.20808e-05	0.00363019		0	0	0	1	0	3
	66	1.014	-0.000559099	0.00942448		-0.00942448	-0.00998357	0.00942448	0.00998357	8.88207e-05	9.96718e-05		0	0	0	0	1	3
	67	0.953	-0.0102431	-0.00735396		0.00735396	-0.00288914	0.00735396	0.00288914	5.40807e-05	8.34714e-06		0	0	0	0	1	3
	68	1.56	-0.0115124	0.00378077		-0.00378077	-0.0152931	0.00378077	0.0152931	1.42942e-05	0.00023388		0	0	0	0	1	3
	70	1.449	-0.0108373	-0.00372031		0.00372031	-0.007117	0.00372031	0.007117	1.38407e-05	5.06517e-05		0	0	0	0	1	3
	71	0.822	-0.0108287	-0.00865713		0.00865713	-0.00217154	0.00865713	0.00217154	7.49458e-05	4.71559e-06		0	0	0	0	1	3
	72	1.206	-0.00427129	0.00206705		-0.00206705	-0.00633834	0.00206705	0.00633834	4.2727e-06	4.01746e-05		0	0	0	0	1	3
	74	0.991	-0.00717097	0.0202816		-0.0202816	-0.0274526	0.0202816	0.0274526	0.000411345	0.000753645		0	0	0	1	0	3
	76	1.403	-0.0113381	0.00237588		-0.00237588	-0.013714	0.00237588	0.013714	5.64479e-06	0.000188074		0	0	0	0	1	3
	77	0.942	-0.0101615	0.000663882		-0.000663882	-0.0108253	0.000663882	0.0108253	4.40739e-07	0.000117188		0	0	0	0	1	3
	78	0.581	-0.0110384	-0.00138666		0.00138666	-0.00965178	0.00138666	0.00965178	1.92283e-06	9.31568e-05		0	0	0	0	1	3
	80	1.037	-0.0109796	-0.00125496		0.00125496	-0.00972468	0.00125496	0.00972468	1.57493e-06	9.45695e-05		0	0	0	0	1	3
	81	0.658	-0.00954318	-0.00341365		0.00341365	-0.00612953	0.00341365	0.00612953	1.1653e-05	3.75711e-05		0	0	0	0	1	3
	82	0.875	-0.0102533	-0.00546929		0.00546929	-0.00478396	0.00546929	0.00478396	2.99132e-05	2.28862e-05		0	0	0	0	1	3
16	3	1.861	0.0682765	0.168149		-0.168149	-0.0998721	0.168149	0.0998721	0.028274	0.00997444		0	1	0	0	0	1
	5	1.988	0.0681309	0.168434		-0.168434	-0.100303	0.168434	0.100303	0.0283699	0.0100606		0	1	0	0	0	1
	9	6.817	0.0310198	0.0262292		-0.0262292	0.00479066	0.0262292	0.00479066	0.00068797	2.29504e-05		0	0	0	0	1	3
	11	6.683	0.0292457	0.023563		-0.023563	0.00568269	0.023563	0.00568269	0.000555215	3.2293e-05		0	0	0	0	0	3
	13	6.848	0.0432417	0.0168715		-0.0168715	0.0263702	0.0168715	0.0263702	0.000284647	0.000695387		0	0	0	0	1	3
	18	7.128	0.0657519	0.0222316		-0.0222316	0.0435203	0.0222316	0.0435203	0.000494246	0.00189401		0	0	0	0	0	3
	21	7.248	0.0582271	0.0217875		-0.0217875	0.0364396	0.0217875	0.0364396	0.000474696	0.00132784		0	0	0	0	0	3
	24	2.094	-0.0109842	0.00583092		-0.00583092	-0.0168151	0.00583092	0.0168151	3.39996e-05	0.000282749		0	0	0	0	0	3
	25	2.018	-0.0106797	-0.00523989		0.00523989	-0.00543986	0.00523989	0.00543986	2.74564e-05	2.9592e-05		0	0	0	0	0	3
	26	1.914	-0.0107078	-0.0134176		0.0134176	0.0027098	0.0134176	0.0027098	0.000180033	7.34299e-06		0	0	0	0	0	3
	28	2.672	-0.0109085	-0.00918834		0.00918834	-0.0017202	0.00918834	0.0017202	8.44256e-05	2.9591e-06		0	0	0	0	0	3
	29	2.237	-0.00938644	-0.00180859		0.00180859	-0.00757785	0.00180859	0.00757785	3.271e-06	5.74239e-05		0	0	0	0	0	3
	30	2.489	-0.00902246	-0.00394596		0.00394596	-0.0050765	0.00394596	0.0050765	1.55706e-05	2.57709e-05		0	0	0	0	0	3
	32	2.33	-0.011245	-0.00338793		0.00338793	-0.00785707	0.00338793	0.00785707	1.1478e-05	6.17336e-05		0	0	0	0	0	3
	33	2.004	-0.0107643	-0.00964783		0.00964783	-0.00111643	0.00964783	0.00111643	9.30806e-05	1.24641e-06		0	0	0	0	0	3
	34	1.931	-0.0107382	-0.000535945		0.000535945	-0.0102023	0.000535945	0.0102023	2.87237e-07	0.000104087		0	0	0	0	0	3
	38	6.824	0.0509897	0.0284964		-0.0284964	0.0224933	0.0284964	0.0224933	0.000812044	0.000505949		0	0	0	0	0	3
	41	7.152	0.0559573	0.0232857		-0.0232857	0.0326716	0.0232857	0.0326716	0.000542222	0.00106743		0	0	0	0	0	3
	44	2.251	-0.0112661	0.0248269		-0.0248269	-0.0360929	0.0248269	0.0360929	0.000616374	0.0013027		0	0	0	0	0	3
	45	2.582	-0.0108292	0.0400277		-0.0400277	-0.050857	0.0400277	0.050857	0.00160222	0.00258643		0	0	0	0	0	3
	46	2.739	-0.0113201	0.0291039		-0.0291039	-0.0404239	0.0291039	0.0404239	0.000847035	0.00163409		0	0	0	0	0	3
	48	1.093	0.0129074	0.0352653		-0.0352653	-0.022358	0.0352653	0.022358	0.00124364	0.000499878		0	0	0	0	0	3
	49	1.966	-0.0110528	0.0182858		-0.0182858	-0.0293386	0.0182858	0.0293386	0.000334372	0.000860755		0	0	0	0	0	3
	50	1.591	-0.00986102	0.00172925		-0.00172925	-0.0115903	0.00172925	0.0115903	2.9903e-06	0.000134334		0	0	0	0	0	3
	52	3.189	-0.00937359	-0.0214511		0.0214511	0.0120775	0.0214511	0.0120775	0.000460149	0.000145866		0	0	0	0	0	3
	53	1.841	-0.0104736	-0.00432987		0.00432987	-0.00614374	0.00432987	0.00614374	1.87478e-05	3.77455e-05		0	0	0	0	0	3
	54	1.655	-0.0107558	-0.00186824		0.00186824	-0.00888753	0.00186824	0.00888753	3.49032e-06	7.89882e-05		0	0	0	0	0	3
	58	6.858	0.0427682	0.017052		-0.017052	0.0257162	0.017052	0.0257162	0.00029077	0.000661323		0	0	0	0	1	3
	60	6.714	0.0295702	0.0236045		-0.0236045	0.0059657	0.0236045	0.0059657	0.000557173	3.55895e-05		0	0	0	0	0	3
	62	6.806	0.0318403	0.0263945		-0.0263945	0.00544584	0.0263945	0.00544584	0.00069667	2.96571e-05		0	0	0	0	1	3
	67	6.78	0.0504918	0.0284119		-0.0284119	0.0220799	0.0284119	0.0220799	0.000807236	0.00048752		0	0	0	0	0	3
	70	7.032	0.0558276	0.0234156		-0.0234156	0.0324119	0.0234156	0.0324119	0.000548292	0.00105053		0	0	0	0	0	3
	73	2.76	-0.011319	0.0290153		-0.0290153	-0.0403342	0.0290153	0.0403342	0.000841885	0.00162685		0	0	0	0	0	3
	74	2.355	-0.011256	0.0246269		-0.0246269	-0.0358829	0.0246269	0.0358829	0.000606483	0.00128758		0	0	0	0	0	3
	75	2.662	-0.0107937	0.0395723		-0.0395723	-0.050366	0.0395723	0.050366	0.00156597	0.00253673		0	0	0	0	0	3
	77	1.579	-0.0098742	0.00243818		-0.00243818	-0.0123124	0.00243818	0.0123124	5.94473e-06	0.000151595		0	0	0	0	0	3
	78	1.073	0.013172	0.0358116		-0.0358116	-0.0226396	0.0358116	0.0226396	0.00128247	0.000512551		0	0	0	0	0	3
	79	1.916	-0.0110693	0.0176655		-0.0176655	-0.0287348	0.0176655	0.0287348	0.000312069	0.000825688		0	0	0	0	0	3
	81	1.754	-0.0107154	-0.00205052		0.00205052	-0.00866489	0.00205052	0.00866489	4.20463e-06	7.50803e-05		0	0	0	0	0	3
	82	3.402	-0.00918731	-0.0227923		0.0227923	0.013605	0.0227923	0.013605	0.000519489	0.000185096		0	0	0	0	0	3
	83	1.893	-0.0106706	-0.00520701		0.00520701	-0.00546359	0.00520701	0.00546359	2.71129e-05	2.98509e-05		0	0	0	0	0	3
	87	7.332	0.0590735	0.0217912		-0.0217912	0.0372823	0.0217912	0.0372823	0.000474858	0.00138997		0	0	0	0	0	3
	90	6.971	0.0650406	0.02223		-0.02223	0.0428107	0.02223	0.0428107	0.000494171	0.00183275		0	0	0	0	0	3
	93	1.968	-0.0106391	-0.000577158		0.000577158	-0.0100619	0.000577158	0.0100619	3.33112e-07	0.000101242		0	0	0	0	0	3
	94	2.294	-0.0112558	-0.00337056		0.00337056	-0.00788522	0.00337056	0.00788522	1.13606e-05	6.21766e-05		0	0	0	0	0	3
	95	2.054	-0.0108237	-0.0096735		0.0096735	-0.00115016	0.0096735	0.00115016	9.35765e-05	1.32287e-06		0	0	0	0	0	3
	97	2.562	-0.00877112	-0.00408504		0.00408504	-0.00468608	0.00408504	0.00468608	1.66876e-05	2.19594e-05		0	0	0	0	0	3
	98	2.708	-0.0108875	-0.00890776		0.00890776	-0.00197973	0.00890776	0.00197973	7.93482e-05	3.91931e-06		0	0	0	0	0	3
	99	2.319	-0.009175	-0.0016491		0.0016491	-0.00752591	0.0016491	0.00752591	2.71952e-06	5.66393e-05		0	0	0	0	0	3
	101	2.093	-0.0109945	0.00559855		-0.00559855	-0.016593	0.00559855	0.016593	3.13437e-05	0.000275329		0	0	0	0	0	3
	102	2.112	-0.0105567	-0.00488983		0.00488983	-0.00566683	0.00488983	0.00566683	2.39105e-05	3.21129e-05		0	0	0	0	0	3
	103	1.796	-0.010883	-0.0130948		0.0130948	0.00221177	0.0130948	0.00221177	0.000171473	4.89193e-06		0	0	0	0	0	3
17	5	7.618	0.0156218	0.0225709		-0.0225709	-0.00694905	0.0225709	0.00694905	0.000509445	4.82893e-05		0	0	0	0	1	3
	8	1.701	-0.0109052	-0.000254398		0.000254398	-0.0106508	0.000254398	0.0106508	6.47183e-08	0.00011344		0	0	0	0	1	3
	9	3.09	-0.0111389	-0.0359847		0.0359847	0.0248458	0.0359847	0.0248458	0.0012949	0.000617315		0	0	0	0	1	3
	10	1.988	-0.011295	-0.00281865		0.00281865	-0.00847633	0.00281865	0.00847633	7.94478e-06	7.18481e-05		0	0	0	0	1	3
	13	6.968	0.0185997	0.0174239		-0.0174239	0.00117584	0.0174239	0.00117584	0.000303591	1.3826e-06		0	0	0	0	0	3
	16	8.645	0.0739457	0.216495		-0.216495	-0.142549	0.216495	0.142549	0.0468702	0.0203204		0	0	1	1	0	2
	18	1.366	-0.0105478	-0.018305		0.018305	0.00775714	0.018305	0.00775714	0.000335073	6.01733e-05		0	0	0	0	1	3
	19	1.237	0.00051602	-0.0168444		0.0168444	0.0173604	0.0168444	0.0173604	0.000283734	0.000301384		0	0	0	0	1	3
	20	0.506	-0.0105491	0.00128676		-0.00128676	-0.0118359	0.00128676	0.0118359	1.65576e-06	0.000140088		0	0	0	0	1	3
	22	6.846	0.0120645	0.0213295		-0.0213295	-0.00926505	0.0213295	0.00926505	0.000454949	8.58412e-05		0	0	0	0	1	3
	26	7.385	0.0395631	0.0142803		-0.0142803	0.0252828	0.0142803	0.0252828	0.000203928	0.00063922		0	0	0	0	0	3
	31	7.336	0.00599916	0.0226994		-0.0226994	-0.0167002	0.0226994	0.0167002	0.000515263	0.000278898		0	0	0	0	1	3
	33	8.586	0.0684618	0.208806		-0.208806	-0.140345	0.208806	0.140345	0.0436002	0.0196966		0	0	1	1	0	2
	39	8.11	0.0355654	0.0477662		-0.0477662	-0.0122008	0.0477662	0.0122008	0.00228161	0.00014886		0	0	0	1	1	3
	41	7.661	0.0290115	0.0476162		-0.0476162	-0.0186048	0.0476162	0.0186048	0.00226731	0.000346137		0	0	0	1	1	3
	44	8.627	0.0688674	0.208037		-0.208037	-0.139169	0.208037	0.139169	0.0432793	0.0193681		0	0	1	1	0	2
	48	8.803	0.0742816	0.214774		-0.214774	-0.140492	0.214774	0.140492	0.0461277	0.019738		0	0	1	1	0	2
	50	7.577	0.0399561	0.023348		-0.023348	0.0166081	0.023348	0.0166081	0.000545128	0.00027583		0	0	0	0	1	3
	52	8.092	0.0371531	0.048081		-0.048081	-0.010928	0.048081	0.010928	0.00231179	0.00011942		0	0	0	1	1	3
	55	7.523	0.0357961	0.0233031		-0.0233031	0.012493	0.0233031	0.012493	0.000543036	0.000156074		0	0	0	0	1	3
	59	7.74	0.0270221	0.0473		-0.0473	-0.0202779	0.0473	0.0202779	0.00223729	0.000411194		0	0	0	1	1	3
	62	7.188	0.00334694	0.0233116		-0.0233116	-0.0199647	0.0233116	0.0199647	0.000543431	0.000398588		0	0	0	0	1	3
	64	1.596	-0.0108365	-0.0147652		0.0147652	0.00392871	0.0147652	0.00392871	0.000218011	1.54348e-05		0	0	0	0	1	3
	65	1.382	-0.0111826	-0.00958148		0.00958148	-0.00160111	0.00958148	0.00160111	9.18047e-05	2.56356e-06		0	0	0	0	1	3
	66	1.762	-0.0106352	0.032707		-0.032707	-0.0433422	0.032707	0.0433422	0.00106975	0.00187855		0	0	0	0	1	3
	68	1.697	-0.00968284	-0.0245009		0.0245009	0.014818	0.0245009	0.014818	0.000600293	0.000219574		0	0	0	0	1	3
	69	1.827	-0.0109927	0.000958521		-0.000958521	-0.0119512	0.000958521	0.0119512	9.18762e-07	0.000142832		0	0	0	0	1	3
	70	0.955	-0.00537329	-0.0061615		0.0061615	0.000788205	0.0061615	0.000788205	3.7964e-05	6.21267e-07		0	0	0	0	1	3
	72	7.57	0.0147565	0.0224841		-0.0224841	-0.00772752	0.0224841	0.00772752	0.000505533	5.97146e-05		0	0	0	0	1	3
	74	7.355	0.00601118	0.0227014		-0.0227014	-0.0166902	0.0227014	0.0166902	0.000515353	0.000278563		0	0	0	0	1	3
	76	1.814	-0.00957654	-0.0242792		0.0242792	0.0147027	0.0242792	0.0147027	0.00058948	0.000216168		0	0	0	0	1	3
	77	1.718	-0.0111215	0.00106898		-0.00106898	-0.0121905	0.00106898	0.0121905	1.14272e-06	0.000148609		0	0	0	0	1	3
	78	1.208	-0.00564505	-0.00646751		0.00646751	0.000822458	0.00646751	0.000822458	4.18287e-05	6.76438e-07		0	0	0	0	1	3
	82	1.714	-0.0109068	-0.000382925		0.000382925	-0.0105238	0.000382925	0.0105238	1.46632e-07	0.000110751		0	0	0	0	1	3
	83	3.135	-0.0111415	-0.0360608		0.0360608	0.0249193	0.0360608	0.0249193	0.00130038	0.00062097		0	0	0	0	1	3
	84	1.811	-0.011304	-0.0031388		0.0031388	-0.00816515	0.0031388	0.00816515	9.85209e-06	6.66697e-05		0	0	0	0	1	3
	86	7.273	0.00459013	0.0232323		-0.0232323	-0.0186422	0.0232323	0.0186422	0.00053974	0.000347531		0	0	0	0	1	3
	88	7.399	0.0389733	0.0145303		-0.0145303	0.0244431	0.0145303	0.0244431	0.000211129	0.000597463		0	0	0	0	0	3
	90	7.033	0.0198635	0.0174061		-0.0174061	0.00245746	0.0174061	0.00245746	0.000302972	6.03909e-06		0	0	0	0	0	3
	92	1.58	-0.0111331	-0.00934208		0.00934208	-0.00179101	0.00934208	0.00179101	8.72744e-05	3.20773e-06		0	0	0	0	1	3
	93	1.787	-0.0109689	0.0327598		-0.0327598	-0.0437288	0.0327598	0.0437288	0.00107321	0.0019122		0	0	0	0	1	3
	94	1.795	-0.0108383	-0.0147425		0.0147425	0.00390418	0.0147425	0.00390418	0.000217341	1.52426e-05		0	0	0	0	1	3
	96	6.846	0.0132683	0.0212722		-0.0212722	-0.00800391	0.0212722	0.00800391	0.000452505	6.40626e-05		0	0	0	0	1	3
	98	1.448	-0.01059	-0.0181622		0.0181622	0.00757216	0.0181622	0.00757216	0.000329865	5.73376e-05		0	0	0	0	1	3
	99	0.922	-6.65113e-05	-0.0165199		0.0165199	0.0164534	0.0165199	0.0164534	0.000272908	0.000270715		0	0	0	0	1	3
	100	0.58	-0.0106359	0.001404		-0.001404	-0.0120399	0.001404	0.0120399	1.97121e-06	0.000144959		0	0	0	0	1	3
19	16	0.483	0.00448757	0.00287105		-0.00287105	0.00161651	0.00287105	0.00161651	8.24294e-06	2.61312e-06		0	0	0	1	1	3
	17	-0.157	-0.00907616	0.00553639		-0.00553639	-0.0146125	0.00553639	0.0146125	3.06516e-05	0.000213526		0	0	0	1	1	3
	18	0.184	-0.00415039	-0.00704074		0.00704074	0.00289035	0.00704074	0.00289035	4.95721e-05	8.35414e-06		0	0	0	1	1	3
	20	0.293	-0.0115498	-0.0254223		0.0254223	0.0138725	0.0254223	0.0138725	0.000646292	0.000192446		0	0	0	1	1	3
	21	0.19	-0.00832684	0.0103822		-0.0103822	-0.0187091	0.0103822	0.0187091	0.00010779	0.000350029		0	0	0	1	1	3
	22	0.075	0.0243247	-0.0159042		0.0159042	0.0402289	0.0159042	0.0402289	0.000252944	0.00161836		0	0	0	1	1	3
	24	0.347	-0.0286596	0.0267131		-0.0267131	-0.0553727	0.0267131	0.0553727	0.000713591	0.00306613		0	0	0	1	1	3
	25	-0.03	0.00637258	0.00484958		-0.00484958	0.001523	0.00484958	0.001523	2.35185e-05	2.31953e-06		0	0	0	1	1	3
	26	0.51	-0.00906043	0.0148594		-0.0148594	-0.0239198	0.0148594	0.0239198	0.000220801	0.000572157		0	0	0	1	1	3
	28	0.148	-0.00942624	-0.0103123		0.0103123	0.000886015	0.0103123	0.000886015	0.000106343	7.85022e-07		0	0	0	1	1	3
	29	-0.092	-0.00537384	0.0148453		-0.0148453	-0.0202191	0.0148453	0.0202191	0.000220382	0.000408813		0	0	0	1	1	3
	30	0.242	0.0106734	0.0185086		-0.0185086	-0.00783519	0.0185086	0.00783519	0.000342568	6.13902e-05		0	0	0	1	1	3
	32	1.16	0.00267126	-0.0323267		0.0323267	0.034998	0.0323267	0.034998	0.00104502	0.00122486		0	0	0	1	1	3
	33	-0.07	-0.006236	-0.0105277		0.0105277	0.00429172	0.0105277	0.00429172	0.000110833	1.84189e-05		0	0	0	1	1	3
	34	0.019	-0.0247957	-0.0866153		0.0866153	0.0618196	0.0866153	0.0618196	0.0075022	0.00382166		0	0	0	1	1	3
	36	-0.012	0.00572082	-0.00204865		0.00204865	0.00776948	0.00204865	0.00776948	4.19699e-06	6.03648e-05		0	0	0	1	1	3
	37	-0.189	-0.00592276	-0.0281732		0.0281732	0.0222505	0.0281732	0.0222505	0.00079373	0.000495083		0	0	0	1	1	3
	38	0.147	0.0014393	0.0100156		-0.0100156	-0.00857629	0.0100156	0.00857629	0.000100312	7.35527e-05		0	0	0	1	1	3
	40	0.928	-0.00146969	-0.002975		0.002975	0.00150531	0.002975	0.00150531	8.8506e-06	2.26595e-06		0	0	0	1	1	3
	41	0.37	-0.00563297	0.0231964		-0.0231964	-0.0288293	0.0231964	0.0288293	0.000538071	0.00083113		0	0	0	1	1	3
	42	0.067	-0.0206554	-0.0450747		0.0450747	0.0244193	0.0450747	0.0244193	0.00203173	0.000596304		0	0	0	1	1	3
	44	0.578	0.0184548	-0.0173927		0.0173927	0.0358475	0.0173927	0.0358475	0.000302505	0.00128504		0	0	0	1	1	3
	45	0.206	-0.00911943	0.021322		-0.021322	-0.0304414	0.021322	0.0304414	0.000454628	0.000926682		0	0	0	1	1	3
	46	0.034	0.00276878	-0.0114391		0.0114391	0.0142079	0.0114391	0.0142079	0.000130853	0.000201864		0	0	0	1	1	3
	48	0.268	0.00197597	0.0138065		-0.0138065	-0.0118305	0.0138065	0.0118305	0.000190618	0.000139961		0	0	0	1	1	3
	49	0.549	0.0232107	-0.00400741		0.00400741	0.0272181	0.00400741	0.0272181	1.60594e-05	0.000740825		0	0	0	1	1	3
	50	0.191	0.00233991	-0.0115433		0.0115433	0.0138832	0.0115433	0.0138832	0.000133247	0.000192743		0	0	0	1	1	3
	52	0.279	-0.00817405	0.00278029		-0.00278029	-0.0109543	0.00278029	0.0109543	7.73001e-06	0.000119998		0	0	0	1	1	3
	53	-0.224	0.025137	-0.0371104		0.0371104	0.0622473	0.0371104	0.0622473	0.00137718	0.00387473		0	0	0	1	1	3
	54	0.125	-0.0119231	-0.000323273		0.000323273	-0.0115998	0.000323273	0.0115998	1.04505e-07	0.000134555		0	0	0	1	1	3
	56	0.15	-0.0349865	-0.0208789		0.0208789	-0.0141076	0.0208789	0.0141076	0.00043593	0.000199025		0	0	0	1	1	3
	57	-0.252	0.00423098	0.00272514		-0.00272514	0.00150583	0.00272514	0.00150583	7.4264e-06	2.26754e-06		0	0	0	1	1	3
	58	0.637	-0.00920456	-0.0232889		0.0232889	0.0140844	0.0232889	0.0140844	0.000542374	0.00019837		0	0	0	1	1	3
	60	0.023	-0.00743171	0.00903397		-0.00903397	-0.0164657	0.00903397	0.0164657	8.16126e-05	0.000271119		0	0	0	1	1	3
	61	0.39	-0.00328562	-0.0321698		0.0321698	0.0288842	0.0321698	0.0288842	0.00103489	0.000834294		0	0	0	1	1	3
	62	0.701	-0.00212596	0.0231374		-0.0231374	-0.0252634	0.0231374	0.0252634	0.00053534	0.000638239		0	0	0	1	1	3
	64	0.108	-0.0130085	-0.00884468		0.00884468	-0.00416384	0.00884468	0.00416384	7.82283e-05	1.73376e-05		0	0	0	1	1	3
	65	0.009	0.00909752	-0.0296609		0.0296609	0.0387585	0.0296609	0.0387585	0.000879771	0.00150222		0	0	0	1	1	3
	66	0.545	-0.00327124	-0.00598243		0.00598243	0.00271118	0.00598243	0.00271118	3.57894e-05	7.3505e-06		0	0	0	1	1	3
	68	0.209	-0.0115016	-0.000630583		0.000630583	-0.010871	0.000630583	0.010871	3.97635e-07	0.000118179		0	0	0	1	1	3
	69	0.75	0.0027179	0.00841088		-0.00841088	-0.00569298	0.00841088	0.00569298	7.07429e-05	3.24101e-05		0	0	0	1	1	3
	70	0.029	0.0143098	0.0111749		-0.0111749	0.00313488	0.0111749	0.00313488	0.000124879	9.82744e-06		0	0	0	1	1	3
	72	0.438	-0.0121452	-0.0389062		0.0389062	0.026761	0.0389062	0.026761	0.00151369	0.000716151		0	0	0	1	1	3
	73	0.39	0.00997914	0.0215164		-0.0215164	-0.0115373	0.0215164	0.0115373	0.000462957	0.000133109		0	0	0	1	1	3
	74	-0.046	0.0280485	-0.0893079		0.0893079	0.117356	0.0893079	0.117356	0.0079759	0.0137725		0	0	0	1	1	3
	76	0.512	-0.0429854	0.00432186		-0.00432186	-0.0473073	0.00432186	0.0473073	1.86785e-05	0.00223798		0	0	0	2	0	3
	77	0.947	0.034653	0.0557686		-0.0557686	-0.0211155	0.0557686	0.0211155	0.00311014	0.000445866		0	0	0	2	0	3
	78	0.089	-0.0249495	0.07079		-0.07079	-0.0957395	0.07079	0.0957395	0.00501122	0.00916605		0	0	0	2	0	3
	80	-0.31	-0.0177587	-0.0173743		0.0173743	-0.000384371	0.0173743	0.000384371	0.000301866	1.47741e-07		0	0	0	2	0	3
	81	0.133	0.00971652	0.00852184		-0.00852184	0.00119468	0.00852184	0.00119468	7.26217e-05	1.42726e-06		0	0	0	2	0	3
	82	-0.021	-0.00598149	0.050958		-0.050958	-0.0569395	0.050958	0.0569395	0.00259672	0.00324211		0	0	0	2	0	3
	84	0.703	0.0696894	0.139335		-0.139335	-0.069646	0.139335	0.069646	0.0194143	0.00485056		0	1	1	0	0	1
	85	0.387	0.069918	0.193241		-0.193241	-0.123323	0.193241	0.123323	0.0373421	0.0152085		0	1	1	0	0	1
	87	0.041	0.0133456	-0.0258432		0.0258432	0.0391888	0.0258432	0.0391888	0.000667872	0.00153576		0	0	0	1	1	3
	88	0.153	-0.00750095	0.0135962		-0.0135962	-0.0210971	0.0135962	0.0210971	0.000184856	0.000445089		0	0	0	1	1	3
	89	1.037	0.0187522	0.0242297		-0.0242297	-0.00547755	0.0242297	0.00547755	0.000587081	3.00036e-05		0	0	0	1	1	3
	91	-0.042	-0.00122638	0.030051		-0.030051	-0.0312774	0.030051	0.0312774	0.000903063	0.000978275		0	0	0	1	1	3
	92	-0.095	0.0250156	-0.00520341		0.00520341	0.030219	0.00520341	0.030219	2.70755e-05	0.00091319		0	0	0	1	1	3
	93	0.167	-0.0104395	-0.022005		0.022005	0.0115655	0.022005	0.0115655	0.000484219	0.00013376		0	0	0	1	1	3
	95	0.15	0.00956496	-0.0551577		0.0551577	0.0647226	0.0551577	0.0647226	0.00304237	0.00418902		0	0	0	1	1	3
	96	0.851	-0.0023717	-0.00385215		0.00385215	0.00148045	0.00385215	0.00148045	1.4839e-05	2.19173e-06		0	0	0	1	1	3
	97	-0.103	-0.0115793	0.0131847		-0.0131847	-0.024764	0.0131847	0.024764	0.000173836	0.000613257		0	0	0	1	1	3
	99	0.022	-0.0325406	0.0295512		-0.0295512	-0.0620918	0.0295512	0.0620918	0.000873273	0.00385539		0	0	0	2	0	3
	100	0.266	-0.0377385	-0.0152284		0.0152284	-0.0225101	0.0152284	0.0225101	0.000231905	0.000506703		0	0	0	2	0	3
	101	0.613	0.0209394	0.0869377		-0.0869377	-0.0659984	0.0869377	0.0659984	0.00755817	0.00435578		0	0	0	2	0	3
	103	0.066	-0.00529128	0.0443149		-0.0443149	-0.0496062	0.0443149	0.0496062	0.00196381	0.00246077		0	0	0	2	0	3
	104	-0.277	-0.0204496	0.0231621		-0.0231621	-0.0436117	0.0231621	0.0436117	0.000536483	0.00190198		0	0	0	2	0	3
	105	0.207	0.0121781	-0.00872959		0.00872959	0.0209077	0.00872959	0.0209077	7.62057e-05	0.000437132		0	0	0	2	0	3
	107	0.227	0.0692447	0.133679		-0.133679	-0.0644344	0.133679	0.0644344	0.0178701	0.00415179		0	1	1	0	0	1
	108	0.17	0.0697891	0.202648		-0.202648	-0.132859	0.202648	0.132859	0.0410661	0.0176514		0	1	1	0	0	1
20	5	1.04	0.0151477	0.0312104		-0.0312104	-0.0160627	0.0312104	0.0160627	0.000974088	0.000258011		0	0	0	1	0	3
	6	1.997	-0.0117581	0.0123438		-0.0123438	-0.0241019	0.0123438	0.0241019	0.00015237	0.000580901		0	0	0	1	0	3
	7	1.498	-0.00977722	0.0132838		-0.0132838	-0.023061	0.0132838	0.023061	0.000176459	0.00053181		0	0	0	1	0	3
	9	2.423	-0.0104683	0.00122835		-0.00122835	-0.0116967	0.00122835	0.0116967	1.50885e-06	0.000136813		0	0	0	1	0	3
	10	1.191	0.0160909	0.00722664		-0.00722664	0.00886426	0.00722664	0.00886426	5.22243e-05	7.85751e-05		0	0	0	1	0	3
	11	1.992	-0.0111114	0.0146198		-0.0146198	-0.0257312	0.0146198	0.0257312	0.00021374	0.000662095		0	0	0	1	0	3
	13	1.053	0.00391909	0.00369139		-0.00369139	0.000227706	0.00369139	0.000227706	1.36264e-05	5.18501e-08		0	0	0	1	0	3
	14	1.451	-0.0084286	-0.00471971		0.00471971	-0.00370889	0.00471971	0.00370889	2.22757e-05	1.37559e-05		0	0	0	1	0	3
	15	1.478	-0.0103485	-0.00360322		0.00360322	-0.00674528	0.00360322	0.00674528	1.29832e-05	4.54988e-05		0	0	0	1	0	3
	19	1.105	0.0134126	0.0184027		-0.0184027	-0.00499009	0.0184027	0.00499009	0.000338659	2.4901e-05		0	0	0	1	0	3
	20	2.742	-0.00912602	0.000619479		-0.000619479	-0.00974549	0.000619479	0.00974549	3.83755e-07	9.49747e-05		0	0	0	1	0	3
	21	1.571	-0.0102219	0.0179665		-0.0179665	-0.0281884	0.0179665	0.0281884	0.000322796	0.000794588		0	0	0	1	0	3
	23	1.93	-0.0110776	0.00804982		-0.00804982	-0.0191275	0.00804982	0.0191275	6.47997e-05	0.00036586		0	0	0	1	0	3
	24	1.226	0.0394301	0.0254766		-0.0254766	0.0139535	0.0254766	0.0139535	0.000649058	0.000194699		0	0	0	1	0	3
	25	1.718	-0.0113793	0.021347		-0.021347	-0.0327264	0.021347	0.0327264	0.000455696	0.00107102		0	0	0	1	0	3
	27	1.021	0.00492384	0.00778079		-0.00778079	-0.00285695	0.00778079	0.00285695	6.05407e-05	8.16214e-06		0	0	0	1	0	3
	28	1.453	-0.00863484	-0.00795156		0.00795156	-0.000683279	0.00795156	0.000683279	6.32272e-05	4.66871e-07		0	0	0	1	0	3
	29	1.448	-0.00992583	-0.00136685		0.00136685	-0.00855898	0.00136685	0.00855898	1.86828e-06	7.32561e-05		0	0	0	1	0	3
	33	2.094	-0.0107357	0.00804183		-0.00804183	-0.0187776	0.00804183	0.0187776	6.4671e-05	0.000352597		0	0	0	1	0	3
	34	1.165	0.00404935	0.0120861		-0.0120861	-0.00803677	0.0120861	0.00803677	0.000146074	6.45897e-05		0	0	0	1	0	3
	35	2.02	-0.0111194	0.0138427		-0.0138427	-0.024962	0.0138427	0.024962	0.00019162	0.000623104		0	0	0	1	0	3
	37	1.499	-0.00858815	-0.00638317		0.00638317	-0.00220498	0.00638317	0.00220498	4.07449e-05	4.86193e-06		0	0	0	1	0	3
	38	1.554	-0.0102628	-0.00312606		0.00312606	-0.00713673	0.00312606	0.00713673	9.77223e-06	5.09329e-05		0	0	0	1	0	3
	39	1.079	0.00284047	0.00132025		-0.00132025	0.00152021	0.00132025	0.00152021	1.74307e-06	2.31105e-06		0	0	0	1	0	3
	41	1.92	-0.0119351	0.0121539		-0.0121539	-0.0240891	0.0121539	0.0240891	0.000147717	0.000580282		0	0	0	1	0	3
	42	1.597	-0.00978776	0.0123424		-0.0123424	-0.0221302	0.0123424	0.0221302	0.000152335	0.000489744		0	0	0	1	0	3
	43	1.1	0.0112947	0.0305851		-0.0305851	-0.0192904	0.0305851	0.0192904	0.000935445	0.000372118		0	0	0	1	0	3
	47	1.607	-0.0114543	0.0219316		-0.0219316	-0.033386	0.0219316	0.033386	0.000480996	0.00111462		0	0	0	1	0	3
	48	1.828	-0.0111173	0.0133759		-0.0133759	-0.0244932	0.0133759	0.0244932	0.000178914	0.000599915		0	0	0	1	0	3
	49	1.226	0.0175512	0.0268245		-0.0268245	-0.00927327	0.0268245	0.00927327	0.000719553	8.59935e-05		0	0	0	1	0	3
	51	1.521	-0.0100201	-0.000748052		0.000748052	-0.00927205	0.000748052	0.00927205	5.59582e-07	8.59709e-05		0	0	0	1	0	3
	52	1.071	0.00435676	0.00219965		-0.00219965	0.00215711	0.00219965	0.00215711	4.83846e-06	4.65314e-06		0	0	0	1	0	3
	53	1.52	-0.00867679	-0.00932884		0.00932884	0.000652046	0.00932884	0.000652046	8.70272e-05	4.25163e-07		0	0	0	1	0	3
	55	1.557	-0.0100579	0.0178732		-0.0178732	-0.027931	0.0178732	0.027931	0.00031945	0.000780142		0	0	0	1	0	3
	56	1.156	0.0093618	0.0174491		-0.0174491	-0.00808733	0.0174491	0.00808733	0.000304472	6.54049e-05		0	0	0	1	0	3
	57	2.782	-0.0089893	0.000113284		-0.000113284	-0.00910259	0.000113284	0.00910259	1.28333e-08	8.28571e-05		0	0	0	1	0	3
21	4	1.79	-0.00989277	-0.00142687		0.00142687	-0.0084659	0.00142687	0.0084659	2.03595e-06	7.16715e-05		0	0	0	1	0	3
	5	1.653	-0.00806283	-0.0806413		0.0806413	0.0725784	0.0806413	0.0725784	0.00650301	0.00526763		0	0	0	1	0	3
	6	1.781	-0.0110509	-0.0704154		0.0704154	0.0593644	0.0704154	0.0593644	0.00495833	0.00352414		0	0	0	1	0	3
	9	1.713	-0.0101924	-0.00081875		0.00081875	-0.00937363	0.00081875	0.00937363	6.70351e-07	8.78649e-05		0	0	0	1	0	3
	10	1.597	-0.0110638	-0.0721316		0.0721316	0.0610678	0.0721316	0.0610678	0.00520297	0.00372928		0	0	0	1	0	3
	11	1.536	-0.00804898	-0.0988638		0.0988638	0.0908149	0.0988638	0.0908149	0.00977406	0.00824734		0	0	0	1	0	3
	15	1.83	0.0476199	0.215177		-0.215177	-0.167557	0.215177	0.167557	0.0463012	0.0280754		0	0	1	0	0	2
	16	1.862	0.0549564	0.169091		-0.169091	-0.114135	0.169091	0.114135	0.0285917	0.0130267		0	0	1	0	0	2
	17	1.56	0.0212467	0.588291		-0.588291	-0.567044	0.588291	0.567044	0.346086	0.321539		0	0	1	0	0	2
	20	1.09	0.0352685	-0.0163389		0.0163389	0.0516074	0.0163389	0.0516074	0.00026696	0.00266333		0	0	1	0	0	2
	21	1.423	0.0114629	-0.0241939		0.0241939	0.0356568	0.0241939	0.0356568	0.000585346	0.00127141		0	0	1	0	0	2
	22	1.273	0.02973	-0.057908		0.057908	0.087638	0.057908	0.087638	0.00335334	0.00768042		0	0	1	0	0	2
	24	1.177	0.0136812	-0.0184156		0.0184156	0.0320968	0.0184156	0.0320968	0.000339135	0.00103021		0	0	1	0	0	2
	25	1.163	0.0375227	-0.00846294		0.00846294	0.0459857	0.00846294	0.0459857	7.16214e-05	0.00211468		0	0	1	0	0	2
	26	1.102	0.0290888	-0.030311		0.030311	0.0593997	0.030311	0.0593997	0.000918754	0.00352833		0	0	1	0	0	2
	32	7.339	0.0811923	0.0225287		-0.0225287	0.0586636	0.0225287	0.0586636	0.000507543	0.00344141		0	0	0	0	0	3
	35	3.051	-0.00124074	-0.000651103		0.000651103	-0.000589634	0.000651103	0.000589634	4.23936e-07	3.47669e-07		0	0	0	0	0	3
	37	1.486	-0.0108821	-0.00121405		0.00121405	-0.0096681	0.00121405	0.0096681	1.47392e-06	9.34721e-05		0	0	0	0	0	3
	38	1.256	-0.010415	-0.00496086		0.00496086	-0.00545414	0.00496086	0.00545414	2.46101e-05	2.97477e-05		0	0	0	0	0	3
	39	1.344	-0.00927785	-0.00240225		0.00240225	-0.0068756	0.00240225	0.0068756	5.77082e-06	4.72738e-05		0	0	0	0	0	3
	41	1.356	-0.010405	-0.00484448		0.00484448	-0.0055605	0.00484448	0.0055605	2.34689e-05	3.09191e-05		0	0	0	0	0	3
	42	1.3	-0.0107101	-0.00370573		0.00370573	-0.0070044	0.00370573	0.0070044	1.37324e-05	4.90616e-05		0	0	0	0	0	3
	43	1.346	-0.00765965	-0.00268787		0.00268787	-0.00497178	0.00268787	0.00497178	7.22466e-06	2.47186e-05		0	0	0	0	0	3
	45	7.719	0.0690155	0.0278252		-0.0278252	0.0411903	0.0278252	0.0411903	0.000774242	0.00169664		0	0	0	0	0	3
	48	3.101	0.0596014	0.000504705		-0.000504705	0.0590967	0.000504705	0.0590967	2.54727e-07	0.00349242		0	0	0	0	0	3
	50	1.015	-0.00979609	-0.00476656		0.00476656	-0.00502953	0.00476656	0.00502953	2.27201e-05	2.52962e-05		0	0	0	0	0	3
	51	1.479	-0.0105071	-0.00424801		0.00424801	-0.00625905	0.00424801	0.00625905	1.80456e-05	3.91757e-05		0	0	0	0	0	3
	52	0.927	-0.0105024	-0.00714434		0.00714434	-0.0033581	0.00714434	0.0033581	5.10416e-05	1.12769e-05		0	0	0	0	0	3
	54	1.704	-0.00789398	-0.00566247		0.00566247	-0.00223151	0.00566247	0.00223151	3.20636e-05	4.97963e-06		0	0	0	0	0	3
	55	1.486	-0.00698274	0.00084999		-0.00084999	-0.00783273	0.00084999	0.00783273	7.22483e-07	6.13516e-05		0	0	0	0	0	3
	56	1.158	-0.00958379	-0.0019677		0.0019677	-0.00761609	0.0019677	0.00761609	3.87183e-06	5.80048e-05		0	0	0	0	0	3
	58	3.045	0.0263248	-0.0260663		0.0260663	0.052391	0.0260663	0.052391	0.000679451	0.00274482		0	0	0	0	0	3
	60	1.073	-0.01111	-0.00842778		0.00842778	-0.00268223	0.00842778	0.00268223	7.10274e-05	7.19436e-06		0	0	0	0	0	3
	61	1.36	-0.0113049	-0.0210393		0.0210393	0.00973441	0.0210393	0.00973441	0.000442653	9.47587e-05		0	0	0	0	0	3
	62	1.363	-0.00972884	-0.00302975		0.00302975	-0.00669909	0.00302975	0.00669909	9.17937e-06	4.48779e-05		0	0	0	0	0	3
	64	1.093	-0.0110717	-0.00313627		0.00313627	-0.00793546	0.00313627	0.00793546	9.83619e-06	6.29715e-05		0	0	0	0	0	3
	65	0.905	-0.00994796	-0.00448077		0.00448077	-0.00546719	0.00448077	0.00546719	2.00773e-05	2.98902e-05		0	0	0	0	0	3
	66	0.695	-0.0106442	-0.0198365		0.0198365	0.00919233	0.0198365	0.00919233	0.000393487	8.4499e-05		0	0	0	0	0	3
	68	7.198	0.104206	0.143076		-0.143076	-0.0388702	0.143076	0.0388702	0.0204707	0.00151089		0	0	0	1	0	3
	70	7.406	0.015672	0.0264965		-0.0264965	-0.0108245	0.0264965	0.0108245	0.000702063	0.00011717		0	0	0	0	1	3
	72	7.106	0.104258	0.149164		-0.149164	-0.044906	0.149164	0.044906	0.02225	0.00201655		0	0	0	1	0	3
	77	7.357	0.0755638	0.0225023		-0.0225023	0.0530615	0.0225023	0.0530615	0.000506352	0.00281552		0	0	0	0	0	3
	80	7.858	0.0706442	0.0268977		-0.0268977	0.0437465	0.0268977	0.0437465	0.000723485	0.00191376		0	0	0	0	0	3
	83	2.995	0.0589463	0.000468832		-0.000468832	0.0584775	0.000468832	0.0584775	2.19804e-07	0.00341962		0	0	0	0	0	3
	85	1.685	-0.00747293	0.00159653		-0.00159653	-0.00906946	0.00159653	0.00906946	2.54891e-06	8.22552e-05		0	0	0	0	0	3
	86	1.696	-0.00770618	-0.00546038		0.00546038	-0.0022458	0.00546038	0.0022458	2.98157e-05	5.04362e-06		0	0	0	0	0	3
	87	1.205	-0.00937189	-0.00161525		0.00161525	-0.00775664	0.00161525	0.00775664	2.60904e-06	6.01654e-05		0	0	0	0	0	3
	89	1.038	-0.00951607	-0.00467847		0.00467847	-0.0048376	0.00467847	0.0048376	2.18881e-05	2.34024e-05		0	0	0	0	0	3
	90	0.93	-0.010644	-0.00673117		0.00673117	-0.0039128	0.00673117	0.0039128	4.53087e-05	1.531e-05		0	0	0	0	0	3
	91	1.522	-0.0105369	-0.00430109		0.00430109	-0.00623583	0.00430109	0.00623583	1.84994e-05	3.88856e-05		0	0	0	0	0	3
	93	2.903	-0.00415107	-0.000659597		0.000659597	-0.00349147	0.000659597	0.00349147	4.35068e-07	1.21904e-05		0	0	0	0	0	3
	95	1.35	-0.00758481	-0.0029265		0.0029265	-0.00465831	0.0029265	0.00465831	8.5644e-06	2.16999e-05		0	0	0	0	0	3
	96	1.278	-0.010649	-0.00367103		0.00367103	-0.00697799	0.00367103	0.00697799	1.34764e-05	4.86924e-05		0	0	0	0	0	3
	97	1.458	-0.0103848	-0.00487541		0.00487541	-0.00550942	0.00487541	0.00550942	2.37696e-05	3.03537e-05		0	0	0	0	0	3
	99	1.347	-0.0105443	-0.0048515		0.0048515	-0.00569278	0.0048515	0.00569278	2.3537e-05	3.24078e-05		0	0	0	0	0	3
	100	1.326	-0.0109712	-0.00144188		0.00144188	-0.00952929	0.00144188	0.00952929	2.07902e-06	9.08073e-05		0	0	0	0	0	3
	101	1.29	-0.00941692	-0.00271592		0.00271592	-0.006701	0.00271592	0.006701	7.37624e-06	4.49034e-05		0	0	0	0	0	3
	103	3.258	0.0328466	-0.0317282		0.0317282	0.0645748	0.0317282	0.0645748	0.00100668	0.00416991		0	0	0	0	0	3
	105	1.154	-0.0111508	-0.00790503		0.00790503	-0.00324576	0.00790503	0.00324576	6.24895e-05	1.05349e-05		0	0	0	0	0	3
	106	1.634	-0.00940647	-0.00114626		0.00114626	-0.00826021	0.00114626	0.00826021	1.31391e-06	6.82311e-05		0	0	0	0	0	3
	107	1.479	-0.0112899	-0.01936		0.01936	0.00807011	0.01936	0.00807011	0.00037481	6.51266e-05		0	0	0	0	0	3
	109	0.888	-0.00982825	-0.00436149		0.00436149	-0.00546676	0.00436149	0.00546676	1.90226e-05	2.98855e-05		0	0	0	0	0	3
	110	1.385	-0.0110655	-0.00353035		0.00353035	-0.0075351	0.00353035	0.0075351	1.24634e-05	5.67777e-05		0	0	0	0	0	3
	111	0.819	-0.0106303	-0.0209648		0.0209648	0.0103345	0.0209648	0.0103345	0.000439524	0.000106803		0	0	0	0	0	3
23	6	8.096	-0.00210159	-0.0194762		0.0194762	0.0173746	0.0194762	0.0173746	0.000379324	0.000301878		0	0	1	3	0	2
	8	7.842	-0.00620373	0.029307		-0.029307	-0.0355107	0.029307	0.0355107	0.000858897	0.00126101		0	0	0	1	3	3
	10	7.907	-0.00209913	-1.50807e-05		1.50807e-05	-0.00208405	1.50807e-05	0.00208405	2.27426e-10	4.34328e-06		0	0	0	0	1	3
	12	7.878	-0.00539054	0.0315481		-0.0315481	-0.0369387	0.0315481	0.0369387	0.000995284	0.00136446		0	0	0	1	3	3
	14	7.977	-0.00975282	-0.0340575		0.0340575	0.0243047	0.0340575	0.0243047	0.00115991	0.000590717		0	0	1	3	0	2
24	7	8.364	0.0170807	-0.0232457		0.0232457	0.0403264	0.0232457	0.0403264	0.000540364	0.00162622		0	0	1	3	0	2
	9	7.919	-0.00780988	0.0328719		-0.0328719	-0.0406818	0.0328719	0.0406818	0.00108056	0.00165501		0	0	0	1	3	3
	11	8.465	0.0276712	0.0146254		-0.0146254	0.0130458	0.0146254	0.0130458	0.000213901	0.000170193		0	0	0	0	1	3
	14	8.356	0.0290066	0.028921		-0.028921	8.56167e-05	0.028921	8.56167e-05	0.000836425	7.33022e-09		0	0	0	0	1	3
	16	8.018	0.0296593	0.0175344		-0.0175344	0.012125	0.0175344	0.012125	0.000307454	0.000147015		0	0	0	0	0	3
	18	8.093	0.0186505	0.0210886		-0.0210886	-0.00243817	0.0210886	0.00243817	0.00044473	5.94465e-06		0	0	0	0	1	3
	20	8.452	0.0686926	0.0539863		-0.0539863	0.0147063	0.0539863	0.0147063	0.00291452	0.000216274		0	0	0	1	3	3
25	10	7.226	0.0164841	0.0110087		-0.0110087	0.00547542	0.0110087	0.00547542	0.000121191	2.99802e-05		0	0	0	0	1	3
	11	8.796	0.157347	0.0174847		-0.0174847	0.139862	0.0174847	0.139862	0.000305713	0.0195614		0	0	1	0	0	2
	12	7.4	0.0981667	0.0211693		-0.0211693	0.0769974	0.0211693	0.0769974	0.000448141	0.0059286		0	0	0	1	0	3
	13	2.655	1.47386	0.120317		-0.120317	1.35354	0.120317	1.35354	0.0144763	1.83207		0	0	1	0	0	2
	14	2.367	0.0681258	0.0470003		-0.0470003	0.0211255	0.0470003	0.0211255	0.00220903	0.000446286		0	0	1	0	0	2
	15	2.615	0.140635	0.0132336		-0.0132336	0.127401	0.0132336	0.127401	0.000175129	0.016231		0	0	1	0	0	2
	16	2.909	1.60398	0.0649785		-0.0649785	1.53901	0.0649785	1.53901	0.00422221	2.36854		0	0	1	0	0	2
	23	8.817	0.157313	0.0174072		-0.0174072	0.139906	0.0174072	0.139906	0.00030301	0.0195736		0	0	1	0	0	2
	24	7.398	0.0990209	0.021243		-0.021243	0.0777779	0.021243	0.0777779	0.000451263	0.00604941		0	0	0	1	0	3
	25	2.921	1.60904	0.0626961		-0.0626961	1.54635	0.0626961	1.54635	0.0039308	2.39119		0	0	1	0	0	2
	26	2.609	0.145615	0.0129347		-0.0129347	0.132681	0.0129347	0.132681	0.000167307	0.0176041		0	0	1	0	0	2
	27	2.364	0.0678476	0.0457899		-0.0457899	0.0220577	0.0457899	0.0220577	0.00209672	0.000486542		0	0	1	0	0	2
	28	2.646	1.46201	0.117618		-0.117618	1.34439	0.117618	1.34439	0.0138341	1.80739		0	0	1	0	0	2
26	8	7.37	-0.00861784	0.0342342		-0.0342342	-0.0428521	0.0342342	0.0428521	0.00117198	0.0018363		0	0	0	1	3	3
	10	7.637	0.0146648	0.012034		-0.012034	0.00263078	0.012034	0.00263078	0.000144818	6.92103e-06		0	0	0	0	1	3
	12	7.433	-0.00833348	0.0309441		-0.0309441	-0.0392776	0.0309441	0.0392776	0.000957537	0.00154273		0	0	0	1	3	3
	15	2.325	-0.0112681	-0.0106538		0.0106538	-0.000614331	0.0106538	0.000614331	0.000113504	3.77402e-07		0	0	0	1	3	3
	16	2.891	-0.00900374	0.0251376		-0.0251376	-0.0341414	0.0251376	0.0341414	0.0006319	0.00116563		0	0	0	1	3	3
	17	2.893	-0.00840969	0.0246381		-0.0246381	-0.0330478	0.0246381	0.0330478	0.000607036	0.00109216		0	0	0	1	3	3
	19	2.282	-0.0112473	-0.037726		0.037726	0.0264787	0.037726	0.0264787	0.00142325	0.000701119		0	0	0	1	3	3
	20	3.115	-0.0108283	0.00459694		-0.00459694	-0.0154253	0.00459694	0.0154253	2.11319e-05	0.000237939		0	0	0	1	3	3
	21	3.084	-0.0107006	0.00373584		-0.00373584	-0.0144365	0.00373584	0.0144365	1.39565e-05	0.000208411		0	0	0	1	3	3
27	4	2.752	0.0681593	0.0867222		-0.0867222	-0.0185629	0.0867222	0.0185629	0.00752074	0.000344581		0	1	0	0	0	1
	5	2.973	0.0691521	0.110868		-0.110868	-0.0417155	0.110868	0.0417155	0.0122916	0.00174018		0	1	0	0	0	1
	9	7.051	0.0577084	0.0270197		-0.0270197	0.0306887	0.0270197	0.0306887	0.000730066	0.000941793		0	0	0	0	1	3
	11	7.36	0.0273744	0.00874122		-0.00874122	0.0186332	0.00874122	0.0186332	7.64089e-05	0.000347197		0	0	0	0	0	3
	13	7.292	0.00229263	0.0197635		-0.0197635	-0.0174709	0.0197635	0.0174709	0.000390596	0.000305232		0	0	0	0	1	3
	15	7.345	0.0284491	0.0177698		-0.0177698	0.0106794	0.0177698	0.0106794	0.000315765	0.000114049		0	0	0	1	0	3
	17	1.494	0.00439204	0.0230096		-0.0230096	-0.0186176	0.0230096	0.0186176	0.000529442	0.000346614		0	0	0	0	0	3
	18	-0.054	0.0215032	0.0119186		-0.0119186	0.00958464	0.0119186	0.00958464	0.000142053	9.18653e-05		0	0	0	0	0	3
	19	2.196	0.0327814	-0.00565155		0.00565155	0.038433	0.00565155	0.038433	3.19401e-05	0.00147709		0	0	0	0	0	3
	22	6.175	0.0662573	-0.024698		0.024698	0.0909553	0.024698	0.0909553	0.00060999	0.00827286		0	0	1	0	0	2
	24	7.192	0.0352858	0.0359303		-0.0359303	-0.000644463	0.0359303	0.000644463	0.00129098	4.15332e-07		0	0	0	1	0	3
	26	7.443	-0.0063406	0.0110559		-0.0110559	-0.0173965	0.0110559	0.0173965	0.000122233	0.000302638		0	0	0	0	1	3
	28	7.513	0.0317817	0.0157565		-0.0157565	0.0160251	0.0157565	0.0160251	0.000248268	0.000256805		0	0	0	1	0	3
	30	7.622	0.0674725	0.0374169		-0.0374169	0.0300555	0.0374169	0.0300555	0.00140003	0.000903334		0	0	1	0	0	2
	33	7.587	0.0818808	0.030865		-0.030865	0.0510158	0.030865	0.0510158	0.000952648	0.00260261		0	0	1	0	0	2
	35	7.559	0.0385837	0.0202766		-0.0202766	0.0183072	0.0202766	0.0183072	0.00041114	0.000335152		0	0	0	1	0	3
	37	7.717	-0.00295918	0.0113867		-0.0113867	-0.0143459	0.0113867	0.0143459	0.000129656	0.000205804		0	0	0	0	1	3
	39	7.854	0.0410415	0.0238243		-0.0238243	0.0172172	0.0238243	0.0172172	0.000567597	0.000296433		0	0	0	1	0	3
	41	8.174	0.081423	0.0177566		-0.0177566	0.0636665	0.0177566	0.0636665	0.000315295	0.00405342		0	0	1	0	0	2
	44	7.724	0.0851745	0.0389462		-0.0389462	0.0462282	0.0389462	0.0462282	0.00151681	0.00213705		0	0	1	0	0	2
	46	7.621	0.0384356	0.0229623		-0.0229623	0.0154734	0.0229623	0.0154734	0.000527266	0.000239425		0	0	0	1	0	3
	48	7.746	-0.00221334	0.0116866		-0.0116866	-0.0138999	0.0116866	0.0138999	0.000136576	0.000193208		0	0	0	0	1	3
	50	7.857	0.044246	0.0256059		-0.0256059	0.01864	0.0256059	0.01864	0.000655664	0.00034745		0	0	0	1	0	3
	52	8.709	0.0857985	0.0161687		-0.0161687	0.0696298	0.0161687	0.0696298	0.000261426	0.00484831		0	0	1	0	0	2
28	3	7.964	0.067013	0.0127365		-0.0127365	0.0542765	0.0127365	0.0542765	0.000162219	0.00294594		0	0	1	0	0	2
	5	7.724	0.0373483	0.0232285		-0.0232285	0.0141199	0.0232285	0.0141199	0.000539561	0.00019937		0	0	0	1	0	3
	7	7.718	-0.00380228	0.0110802		-0.0110802	-0.0148825	0.0110802	0.0148825	0.000122772	0.000221489		0	0	0	0	1	3
	9	7.656	0.0383926	0.0242087		-0.0242087	0.0141839	0.0242087	0.0141839	0.000586061	0.000201183		0	0	0	1	0	3
	11	7.831	0.0827591	0.038929		-0.038929	0.0438302	0.038929	0.0438302	0.00151546	0.00192108		0	0	1	0	0	2
	15	8.093	0.0655131	0.000311999		-0.000311999	0.0652011	0.000311999	0.0652011	9.73435e-08	0.00425119		0	0	1	0	0	2
	17	7.796	0.0384158	0.0237962		-0.0237962	0.0146196	0.0237962	0.0146196	0.000566261	0.000213732		0	0	0	1	0	3
	19	7.75	-0.00360495	0.0105475		-0.0105475	-0.0141525	0.0105475	0.0141525	0.00011125	0.000200293		0	0	0	0	1	3
	21	7.675	0.0388308	0.0232315		-0.0232315	0.0155993	0.0232315	0.0155993	0.000539704	0.000243337		0	0	0	1	0	3
	23	7.808	0.0827284	0.0398214		-0.0398214	0.0429071	0.0398214	0.0429071	0.00158574	0.00184102		0	0	1	0	0	2
	26	7.957	0.0887242	0.0372468		-0.0372468	0.0514774	0.0372468	0.0514774	0.00138732	0.00264993		0	0	1	0	0	2
	28	7.682	0.0389512	0.0241479		-0.0241479	0.0148033	0.0241479	0.0148033	0.000583121	0.000219138		0	0	0	1	0	3
	30	7.727	-0.00375427	0.0103355		-0.0103355	-0.0140897	0.0103355	0.0140897	0.000106822	0.00019852		0	0	0	0	1	3
	32	7.754	0.0380888	0.0235449		-0.0235449	0.0145439	0.0235449	0.0145439	0.000554361	0.000211526		0	0	0	1	0	3
	34	8.049	0.0671536	0.00474344		-0.00474344	0.0624102	0.00474344	0.0624102	2.25002e-05	0.00389503		0	0	1	0	0	2
	37	7.945	0.0869602	0.0354182		-0.0354182	0.0515419	0.0354182	0.0515419	0.00125445	0.00265657		0	0	1	0	0	2
	39	7.666	0.0381066	0.0252182		-0.0252182	0.0128884	0.0252182	0.0128884	0.000635959	0.000166111		0	0	0	1	0	3
	41	7.695	-0.00386699	0.0106109		-0.0106109	-0.0144779	0.0106109	0.0144779	0.000112592	0.00020961		0	0	0	0	1	3
	43	7.698	0.0374129	0.022952		-0.022952	0.0144609	0.022952	0.0144609	0.000526794	0.000209119		0	0	0	1	0	3
	45	7.962	0.0699204	0.0163893		-0.0163893	0.0535311	0.0163893	0.0535311	0.00026861	0.00286558		0	0	1	0	0	2
30	4	-0.466	0.0241971	0.0207576		-0.0207576	0.0034395	0.0207576	0.0034395	0.000430878	1.18302e-05		0	1	1	0	0	1
	5	-1.417	-0.00211267	0.0292006		-0.0292006	-0.0313133	0.0292006	0.0313133	0.000852678	0.000980524		0	1	1	0	0	1
	6	-0.977	0.0215115	0.0247762		-0.0247762	-0.00326468	0.0247762	0.00326468	0.000613861	1.06582e-05		0	1	1	0	0	1
	8	-1.193	0.0677703	0.191749		-0.191749	-0.123978	0.191749	0.123978	0.0367675	0.0153706		0	1	1	0	0	1
	9	-0.775	0.0681568	0.152961		-0.152961	-0.0848037	0.152961	0.0848037	0.0233969	0.00719167		0	1	1	0	0	1
	10	-0.84	0.068678	0.158475		-0.158475	-0.0897973	0.158475	0.0897973	0.0251144	0.00806355		0	1	1	0	0	1
	14	7.114	0.0867256	0.0247581		-0.0247581	0.0619674	0.0247581	0.0619674	0.000612965	0.00383996		0	0	0	1	1	3
	16	7.499	0.0267316	0.015996		-0.015996	0.0107356	0.015996	0.0107356	0.000255872	0.000115254		0	0	0	0	1	3
	18	6.84	0.0500728	0.0299285		-0.0299285	0.0201443	0.0299285	0.0201443	0.000895716	0.000405791		0	0	0	1	1	3
	23	7.106	0.0585313	0.0207538		-0.0207538	0.0377775	0.0207538	0.0377775	0.000430718	0.00142714		0	0	0	0	0	3
	26	6.936	0.0645254	0.0235233		-0.0235233	0.0410021	0.0235233	0.0410021	0.000553347	0.00168117		0	0	0	0	0	3
	29	1.718	-0.00704498	0.00363641		-0.00363641	-0.0106814	0.00363641	0.0106814	1.32235e-05	0.000114092		0	0	0	0	0	3
	30	1.737	0.000563227	-0.0010842		0.0010842	0.00164743	0.0010842	0.00164743	1.17549e-06	2.71402e-06		0	0	0	0	0	3
	31	2.283	-0.010023	-0.00664119		0.00664119	-0.0033818	0.00664119	0.0033818	4.41054e-05	1.14366e-05		0	0	0	0	0	3
	33	1.978	-0.0101787	-0.00129529		0.00129529	-0.00888338	0.00129529	0.00888338	1.67777e-06	7.89145e-05		0	0	0	0	0	3
	34	2.304	-0.0106692	-0.00328186		0.00328186	-0.00738733	0.00328186	0.00738733	1.07706e-05	5.45727e-05		0	0	0	0	0	3
	35	2.532	-0.0125843	-0.00723087		0.00723087	-0.00535339	0.00723087	0.00535339	5.22855e-05	2.86588e-05		0	0	0	0	0	3
	37	2.403	-0.0111517	-0.00913336		0.00913336	-0.00201834	0.00913336	0.00201834	8.34183e-05	4.07369e-06		0	0	0	0	0	3
	38	1.802	-0.0106707	-0.00670556		0.00670556	-0.00396509	0.00670556	0.00396509	4.49645e-05	1.5722e-05		0	0	0	0	0	3
	39	1.612	-0.010437	-0.00371908		0.00371908	-0.0067179	0.00371908	0.0067179	1.38316e-05	4.51302e-05		0	0	0	0	0	3
	43	6.909	0.0246142	0.0201502		-0.0201502	0.00446394	0.0201502	0.00446394	0.000406032	1.99268e-05		0	0	0	0	0	3
	46	7.244	0.0535888	0.0223104		-0.0223104	0.0312784	0.0223104	0.0312784	0.000497754	0.000978341		0	0	0	0	0	3
	49	1.351	-0.0103479	-0.0129865		0.0129865	0.00263852	0.0129865	0.00263852	0.000168648	6.96178e-06		0	0	0	0	0	3
	50	1.651	-0.0112813	-0.00207476		0.00207476	-0.00920657	0.00207476	0.00920657	4.30461e-06	8.47609e-05		0	0	0	0	0	3
	51	1.99	-0.0109206	-0.0121818		0.0121818	0.00126128	0.0121818	0.00126128	0.000148397	1.59082e-06		0	0	0	0	0	3
	53	2.704	-0.0110575	-0.00423562		0.00423562	-0.00682184	0.00423562	0.00682184	1.79405e-05	4.65375e-05		0	0	0	0	0	3
	54	2.492	-0.0108996	-0.0034775		0.0034775	-0.00742212	0.0034775	0.00742212	1.2093e-05	5.50879e-05		0	0	0	0	0	3
	55	2.007	-0.0107735	-0.00162916		0.00162916	-0.00914438	0.00162916	0.00914438	2.65416e-06	8.36197e-05		0	0	0	0	0	3
	57	1.581	-0.010641	-0.00131069		0.00131069	-0.00933033	0.00131069	0.00933033	1.71791e-06	8.7055e-05		0	0	0	0	0	3
	58	2.631	-0.00890519	0.000309789		-0.000309789	-0.00921498	0.000309789	0.00921498	9.59694e-08	8.49159e-05		0	0	0	0	0	3
	59	1.841	0.00618387	-0.00148501		0.00148501	0.00766888	0.00148501	0.00766888	2.20525e-06	5.88117e-05		0	0	0	0	0	3
	63	7.169	0.104951	0.0445974		-0.0445974	0.0603532	0.0445974	0.0603532	0.00198893	0.00364251		0	0	0	1	1	3
	65	7.364	0.0248653	0.0179223		-0.0179223	0.00694297	0.0179223	0.00694297	0.000321209	4.82049e-05		0	0	0	0	1	3
	67	6.758	0.0457786	0.00550616		-0.00550616	0.0402724	0.00550616	0.0402724	3.03178e-05	0.00162187		0	0	0	1	1	3
	72	7.432	0.0545919	0.0179919		-0.0179919	0.0366	0.0179919	0.0366	0.00032371	0.00133956		0	0	0	0	0	3
	75	7.147	0.0276857	0.017139		-0.017139	0.0105467	0.017139	0.0105467	0.000293746	0.000111232		0	0	0	0	0	3
	78	1.924	0.0042313	-0.00435495		0.00435495	0.00858625	0.00435495	0.00858625	1.89656e-05	7.37238e-05		0	0	0	0	0	3
	79	2.592	-0.0098823	-0.0116083		0.0116083	0.00172604	0.0116083	0.00172604	0.000134754	2.97921e-06		0	0	0	0	0	3
	80	2.293	-0.00521071	0.00189965		-0.00189965	-0.00711036	0.00189965	0.00711036	3.60867e-06	5.05573e-05		0	0	0	0	0	3
	82	2.515	-0.0108052	-0.00416607		0.00416607	-0.00663918	0.00416607	0.00663918	1.73561e-05	4.40788e-05		0	0	0	0	0	3
	83	2.656	-0.0118064	-0.0116157		0.0116157	-0.000190767	0.0116157	0.000190767	0.000134923	3.63921e-08		0	0	0	0	0	3
	84	2.17	-0.0108255	-0.00261498		0.00261498	-0.0082105	0.00261498	0.0082105	6.83814e-06	6.74123e-05		0	0	0	0	0	3
	86	2.444	-0.0113049	-0.00132528		0.00132528	-0.00997965	0.00132528	0.00997965	1.75636e-06	9.95933e-05		0	0	0	0	0	3
	87	1.959	-0.0109884	-0.000646172		0.000646172	-0.0103422	0.000646172	0.0103422	4.17538e-07	0.000106962		0	0	0	0	0	3
	88	1.889	-0.0111781	-0.00134831		0.00134831	-0.00982977	0.00134831	0.00982977	1.81793e-06	9.66244e-05		0	0	0	0	0	3
	92	7.103	0.0541393	0.0218553		-0.0218553	0.032284	0.0218553	0.032284	0.000477655	0.00104226		0	0	0	0	0	3
	95	7.017	0.0637931	0.0205846		-0.0205846	0.0432085	0.0205846	0.0432085	0.000423725	0.00186698		0	0	0	0	0	3
	98	1.398	-0.011188	-0.0102485		0.0102485	-0.000939493	0.0102485	0.000939493	0.000105032	8.82647e-07		0	0	0	0	0	3
	99	1.42	-0.0110693	-0.00162368		0.00162368	-0.00944559	0.00162368	0.00944559	2.63633e-06	8.92192e-05		0	0	0	0	0	3
	100	1.309	-0.00890886	-0.00329281		0.00329281	-0.00561605	0.00329281	0.00561605	1.08426e-05	3.154e-05		0	0	0	0	0	3
	102	2.647	-0.011269	-0.00835584		0.00835584	-0.00291311	0.00835584	0.00291311	6.98201e-05	8.48622e-06		0	0	0	0	0	3
	103	2.391	-0.0105205	-0.00211788		0.00211788	-0.0084026	0.00211788	0.0084026	4.48543e-06	7.06038e-05		0	0	0	0	0	3
	104	2.402	-0.0106573	-0.00216194		0.00216194	-0.00849535	0.00216194	0.00849535	4.67399e-06	7.2171e-05		0	0	0	0	0	3
	106	1.589	-0.0105448	-0.00204836		0.00204836	-0.00849641	0.00204836	0.00849641	4.19577e-06	7.2189e-05		0	0	0	0	0	3
	107	2.118	-0.00960647	-0.00352915		0.00352915	-0.00607732	0.00352915	0.00607732	1.24549e-05	3.69338e-05		0	0	0	0	0	3
	108	1.58	0.00698907	-0.00688389		0.00688389	0.013873	0.00688389	0.013873	4.73879e-05	0.000192459		0	0	0	0	0	3
31	5	7.194	0.0345468	0.0163718		-0.0163718	0.018175	0.0163718	0.018175	0.000268035	0.000330332		0	0	0	1	0	3
	7	7.202	0.0347781	0.0165889		-0.0165889	0.0181892	0.0165889	0.0181892	0.000275191	0.000330848		0	0	0	1	0	3
	11	7.651	0.101575	0.0618125		-0.0618125	0.0397621	0.0618125	0.0397621	0.00382078	0.00158103		0	0	1	0	0	2
	13	6.903	0.0712012	0.0216573		-0.0216573	0.0495439	0.0216573	0.0495439	0.000469041	0.0024546		0	0	0	1	0	3
	15	6.885	0.042385	0.013066		-0.013066	0.029319	0.013066	0.029319	0.000170719	0.000859604		0	0	0	0	1	3
	17	7.095	0.0693549	0.0234496		-0.0234496	0.0459052	0.0234496	0.0459052	0.000549884	0.00210729		0	0	0	1	0	3
	19	7.084	0.0691086	0.02336		-0.02336	0.0457487	0.02336	0.0457487	0.000545688	0.00209294		0	0	0	1	0	3
	21	6.87	0.0422825	0.0130485		-0.0130485	0.029234	0.0130485	0.029234	0.000170264	0.000854626		0	0	0	0	1	3
	23	6.874	0.0705761	0.0216362		-0.0216362	0.04894	0.0216362	0.04894	0.000468124	0.00239512		0	0	0	1	0	3
	25	7.482	0.0949026	0.0599913		-0.0599913	0.0349113	0.0599913	0.0349113	0.00359896	0.0012188		0	0	1	0	0	2
	28	8.499	0.120019	0.0556647		-0.0556647	0.0643541	0.0556647	0.0643541	0.00309856	0.00414145		0	0	1	0	0	2
	30	7.358	0.0731258	0.0172813		-0.0172813	0.0558445	0.0172813	0.0558445	0.000298643	0.00311861		0	0	0	1	0	3
	32	7.184	0.0187876	0.0208302		-0.0208302	-0.00204254	0.0208302	0.00204254	0.000433896	4.17197e-06		0	0	0	0	1	3
	34	7.28	0.069269	0.0102999		-0.0102999	0.0589691	0.0102999	0.0589691	0.000106089	0.00347735		0	0	0	1	0	3
	36	8.297	0.0883828	0.0700723		-0.0700723	0.0183104	0.0700723	0.0183104	0.00491013	0.000335272		0	0	1	0	0	2
32	6	8.896	0.0709477	0.0417752		-0.0417752	0.0291725	0.0417752	0.0291725	0.00174516	0.000851036		0	0	0	1	1	3
	8	8.142	0.0318963	0.0210131		-0.0210131	0.0108833	0.0210131	0.0108833	0.000441549	0.000118446		0	0	0	0	1	3
	10	8.192	0.0491865	0.0193568		-0.0193568	0.0298297	0.0193568	0.0298297	0.000374686	0.000889809		0	0	0	0	0	3
	12	7.86	0.0305321	0.0322891		-0.0322891	-0.00175692	0.0322891	0.00175692	0.00104258	3.08677e-06		0	0	0	0	1	3
	14	6.944	0.050818	0.0354949		-0.0354949	0.0153231	0.0354949	0.0153231	0.00125989	0.000234796		0	0	0	1	1	3
	17	7.887	0.0636297	0.0199841		-0.0199841	0.0436456	0.0199841	0.0436456	0.000399363	0.00190494		0	0	0	1	1	3
	19	8.043	0.0275687	0.0281318		-0.0281318	-0.000563085	0.0281318	0.000563085	0.0007914	3.17065e-07		0	0	0	0	1	3
	21	8.233	0.0490579	0.0205041		-0.0205041	0.0285538	0.0205041	0.0285538	0.000420419	0.000815321		0	0	0	0	0	3
	23	8.122	0.0286347	0.0189507		-0.0189507	0.00968402	0.0189507	0.00968402	0.000359129	9.37802e-05		0	0	0	0	1	3
	25	8.088	0.0457221	0.038579		-0.038579	0.00714316	0.038579	0.00714316	0.00148834	5.10247e-05		0	0	0	1	1	3
	27	4.349	0.0767813	0.320537		-0.320537	-0.243756	0.320537	0.243756	0.102744	0.059417		0	0	1	1	0	2
	28	5.332	0.0877671	0.0215429		-0.0215429	0.0662242	0.0215429	0.0662242	0.000464094	0.00438565		0	0	1	1	0	2
	31	8.051	0.0104646	0.0772086		-0.0772086	-0.066744	0.0772086	0.066744	0.00596117	0.00445477		0	0	0	1	1	3
	33	8.472	0.039219	0.0168901		-0.0168901	0.0223289	0.0168901	0.0223289	0.000285274	0.000498581		0	0	0	0	1	3
	35	7.88	0.0130839	-0.000153694		0.000153694	0.0132376	0.000153694	0.0132376	2.36218e-08	0.000175234		0	0	0	1	1	3
	37	8.887	0.0208485	-0.0121956		0.0121956	0.0330441	0.0121956	0.0330441	0.000148733	0.00109191		0	0	1	1	0	2
33	19	8.024	0.0673311	0.0689345		-0.0689345	-0.00160334	0.0689345	0.00160334	0.00475196	2.5707e-06		0	0	0	1	0	3
	20	7.974	0.110203	0.0686304		-0.0686304	0.0415721	0.0686304	0.0415721	0.00471014	0.00172824		0	0	0	1	0	3
	21	7.761	0.0503085	0.0159258		-0.0159258	0.0343827	0.0159258	0.0343827	0.000253632	0.00118217		0	0	0	1	0	3
	22	7.723	0.00684755	0.0221484		-0.0221484	-0.0153008	0.0221484	0.0153008	0.00049055	0.000234115		0	0	0	0	1	3
	23	6.831	0.00454384	0.0127953		-0.0127953	-0.00825148	0.0127953	0.00825148	0.00016372	6.8087e-05		0	0	0	1	0	3
	24	7.484	0.0423684	0.0396668		-0.0396668	0.00270156	0.0396668	0.00270156	0.00157346	7.29845e-06		0	0	1	0	0	2
	25	7.493	0.0768277	0.053064		-0.053064	0.0237637	0.053064	0.0237637	0.00281579	0.000564712		0	0	1	0	0	2
	26	7.32	0.0513842	0.0261129		-0.0261129	0.0252713	0.0261129	0.0252713	0.000681884	0.000638637		0	0	0	1	0	3
	27	7.515	0.000203595	0.0123154		-0.0123154	-0.0121118	0.0123154	0.0121118	0.000151669	0.000146696		0	0	0	0	1	3
	28	7.623	0.0453369	0.0303667		-0.0303667	0.0149702	0.0303667	0.0149702	0.000922136	0.000224108		0	0	0	1	0	3
	29	8.13	0.0701004	0.0285671		-0.0285671	0.0415333	0.0285671	0.0415333	0.000816078	0.00172501		0	0	1	0	0	2
	41	7.604	0.0413904	0.0398641		-0.0398641	0.00152626	0.0398641	0.00152626	0.00158915	2.32947e-06		0	0	1	0	0	2
	45	8.105	0.0699214	0.0278823		-0.0278823	0.0420391	0.0278823	0.0420391	0.000777423	0.00176729		0	0	1	0	0	2
	47	7.402	0.0759915	0.053589		-0.053589	0.0224025	0.053589	0.0224025	0.00287178	0.000501871		0	0	1	0	0	2
	49	7.781	0.0519824	0.0159457		-0.0159457	0.0360367	0.0159457	0.0360367	0.000254264	0.00129865		0	0	0	1	0	3
	50	6.886	0.00521801	0.0128395		-0.0128395	-0.00762146	0.0128395	0.00762146	0.000164852	5.80866e-05		0	0	0	1	0	3
	51	8.021	0.0673512	0.0687585		-0.0687585	-0.00140729	0.0687585	0.00140729	0.00472773	1.98047e-06		0	0	0	1	0	3
	52	7.969	0.111059	0.069284		-0.069284	0.0417747	0.069284	0.0417747	0.00480028	0.00174513		0	0	0	1	0	3
	54	7.629	0.0447222	0.0304609		-0.0304609	0.0142614	0.0304609	0.0142614	0.000927866	0.000203386		0	0	0	1	0	3
	55	7.312	0.0515432	0.0257972		-0.0257972	0.025746	0.0257972	0.025746	0.000665494	0.000662858		0	0	0	1	0	3
	56	7.773	0.00728762	0.0222262		-0.0222262	-0.0149386	0.0222262	0.0149386	0.000494004	0.000223161		0	0	0	0	1	3
	57	7.528	-0.000123926	0.0123367		-0.0123367	-0.0124606	0.0123367	0.0124606	0.000152195	0.000155268		0	0	0	0	1	3
34	3	-0.302	0.1587	0.0698867		-0.0698867	0.0888129	0.0698867	0.0888129	0.00488415	0.00788773		0	1	0	0	0	1
	6	8.32	0.09388	-0.0116528		0.0116528	0.105533	0.0116528	0.105533	0.000135787	0.0111372		0	0	1	0	0	2
	8	7.232	0.0733104	0.028506		-0.028506	0.0448044	0.028506	0.0448044	0.000812593	0.00200743		0	0	0	1	0	3
	10	7.233	0.0479074	0.0199237		-0.0199237	0.0279837	0.0199237	0.0279837	0.000396955	0.000783086		0	0	0	0	1	3
	12	8.318	0.336945	0.00743067		-0.00743067	0.329515	0.00743067	0.329515	5.52148e-05	0.10858		0	0	0	1	0	3
	17	8.267	0.30718	0.00973507		-0.00973507	0.297445	0.00973507	0.297445	9.47716e-05	0.0884736		0	0	0	1	0	3
	19	7.236	0.0445836	0.0209571		-0.0209571	0.0236265	0.0209571	0.0236265	0.000439201	0.000558209		0	0	0	0	1	3
	21	7.108	0.0703505	0.0259083		-0.0259083	0.0444423	0.0259083	0.0444423	0.000671238	0.00197511		0	0	0	1	0	3
	23	8.294	0.106649	0.0264238		-0.0264238	0.0802251	0.0264238	0.0802251	0.000698219	0.00643606		0	0	1	0	0	2
	26	8.328	0.108095	0.0264124		-0.0264124	0.0816828	0.0264124	0.0816828	0.000697617	0.00667207		0	0	1	0	0	2
	28	7.099	0.0701644	0.0260924		-0.0260924	0.044072	0.0260924	0.044072	0.000680815	0.00194234		0	0	0	1	0	3
	30	7.241	0.0447397	0.0211259		-0.0211259	0.0236137	0.0211259	0.0236137	0.000446305	0.000557608		0	0	0	0	1	3
	32	8.226	0.296537	0.009388		-0.009388	0.287149	0.009388	0.287149	8.81345e-05	0.0824546		0	0	0	1	0	3
	37	8.3	0.326916	0.00762541		-0.00762541	0.31929	0.00762541	0.31929	5.81469e-05	0.101946		0	0	0	1	0	3
	39	7.232	0.0480279	0.019768		-0.019768	0.0282599	0.019768	0.0282599	0.000390775	0.000798622		0	0	0	0	1	3
	41	7.273	0.0728321	0.0288758		-0.0288758	0.0439563	0.0288758	0.0439563	0.000833814	0.00193215		0	0	0	1	0	3
	43	8.314	0.0889197	-0.00801673		0.00801673	0.0969365	0.00801673	0.0969365	6.42679e-05	0.00939668		0	0	1	0	0	2
	44	0.315	0.157195	0.119761		-0.119761	0.0374333	0.119761	0.0374333	0.0143428	0.00140125		0	1	0	0	0	1
	45	-0.291	0.118926	0.091263		-0.091263	0.0276626	0.091263	0.0276626	0.00832894	0.000765222		0	1	0	0	0	1
35	2	1.241	0.139529	0.126999		-0.126999	0.0125307	0.126999	0.0125307	0.0161286	0.000157017		0	1	0	0	0	1
	3	1.22	0.161071	0.210722		-0.210722	-0.0496512	0.210722	0.0496512	0.0444039	0.00246525		0	1	0	0	0	1
	4	0.788	0.17279	0.13633		-0.13633	0.0364604	0.13633	0.0364604	0.0185859	0.00132936		0	1	0	0	0	1
	6	0.948	0.158286	0.129802		-0.129802	0.0284839	0.129802	0.0284839	0.0168486	0.000811332		0	1	0	0	0	1
	7	0.779	0.172848	0.136315		-0.136315	0.0365331	0.136315	0.0365331	0.0185819	0.00133467		0	1	0	0	0	1
	8	1.14	0.166531	0.209865		-0.209865	-0.0433341	0.209865	0.0433341	0.0440433	0.00187784		0	1	0	0	0	1
	12	3.44	-0.0237855	-0.0250786		0.0250786	0.00129306	0.0250786	0.00129306	0.000628934	1.672e-06		0	0	0	0	1	3
	13	2.709	-0.0656468	-0.0637729		0.0637729	-0.00187388	0.0637729	0.00187388	0.00406699	3.51144e-06		0	0	0	0	1	3
	14	3.57	-0.0134446	-0.0397882		0.0397882	0.0263436	0.0397882	0.0263436	0.0015831	0.000693985		0	0	0	0	1	3
	16	3.418	-0.0252841	-0.0362628		0.0362628	0.0109787	0.0362628	0.0109787	0.00131499	0.000120531		0	0	0	0	1	3
	17	2.811	-0.0734751	-0.0570495		0.0570495	-0.0164255	0.0570495	0.0164255	0.00325465	0.000269798		0	0	0	0	1	3
	18	3.784	-0.0137555	-0.034396		0.034396	0.0206404	0.034396	0.0206404	0.00118308	0.000426027		0	0	0	0	1	3
36	7	0.533	0.108553	0.0181671		-0.0181671	0.0903859	0.0181671	0.0903859	0.000330043	0.00816961		0	0	1	1	1	2
	8	0.33	0.230127	0.0546904		-0.0546904	0.175436	0.0546904	0.175436	0.00299104	0.030778		0	0	1	1	1	2
	9	0.347	0.000254244	0.00725608		-0.00725608	-0.00700184	0.00725608	0.00700184	5.26507e-05	4.90258e-05		0	0	1	1	1	2
	11	0.154	0.112137	0.0296256		-0.0296256	0.0825109	0.0296256	0.0825109	0.000877679	0.00680806		0	0	1	1	1	2
	12	0.115	-0.0149934	0.00748009		-0.00748009	-0.0224735	0.00748009	0.0224735	5.59517e-05	0.000505057		0	0	1	1	1	2
	13	0.109	-0.0103265	0.00277927		-0.00277927	-0.0131058	0.00277927	0.0131058	7.72432e-06	0.000171761		0	0	1	1	1	2
	15	0.173	-0.019167	0.0176885		-0.0176885	-0.0368554	0.0176885	0.0368554	0.000312882	0.00135832		0	0	1	1	1	2
	16	0.232	0.175749	0.0741078		-0.0741078	0.101641	0.0741078	0.101641	0.00549196	0.010331		0	0	1	1	1	2
	17	0.423	0.0136691	0.0153493		-0.0153493	-0.00168022	0.0153493	0.00168022	0.000235602	2.82314e-06		0	0	1	1	1	2
	19	0.193	0.104839	0.0318951		-0.0318951	0.0729437	0.0318951	0.0729437	0.0010173	0.00532079		0	0	1	1	1	2
	20	0.093	-0.0185032	0.00631751		-0.00631751	-0.0248207	0.00631751	0.0248207	3.99109e-05	0.000616066		0	0	1	1	1	2
	21	0.246	-0.00322465	0.00865052		-0.00865052	-0.0118752	0.00865052	0.0118752	7.48314e-05	0.00014102		0	0	1	1	1	2
	23	0.306	0.518979	0.0710723		-0.0710723	0.447906	0.0710723	0.447906	0.00505128	0.20062		0	0	1	1	1	2
	24	0.604	0.0131618	0.0300736		-0.0300736	-0.0169119	0.0300736	0.0169119	0.000904422	0.000286011		0	0	1	1	1	2
	25	0.381	0.0788547	0.00772186		-0.00772186	0.0711329	0.00772186	0.0711329	5.96271e-05	0.00505989		0	0	1	1	1	2
	27	0.386	-0.0133446	0.0195253		-0.0195253	-0.0328699	0.0195253	0.0328699	0.000381239	0.00108043		0	0	1	1	1	2
	28	0.296	0.0954286	0.0731332		-0.0731332	0.0222954	0.0731332	0.0222954	0.00534846	0.000497086		0	0	1	1	1	2
	29	0.282	-0.0060485	0.00903621		-0.00903621	-0.0150847	0.00903621	0.0150847	8.16531e-05	0.000227548		0	0	1	1	1	2
	31	0.351	0.0997831	0.0129817		-0.0129817	0.0868014	0.0129817	0.0868014	0.000168524	0.00753448		0	0	1	1	1	2
	32	0.354	-0.0146741	0.00549003		-0.00549003	-0.0201641	0.00549003	0.0201641	3.01404e-05	0.00040659		0	0	1	1	1	2
	33	0.192	-0.012826	-0.00171273		0.00171273	-0.0111132	0.00171273	0.0111132	2.93344e-06	0.000123504		0	0	1	1	1	2
	35	0.21	-0.0303189	0.0174752		-0.0174752	-0.047794	0.0174752	0.047794	0.000305381	0.00228427		0	0	1	1	1	2
	36	0.39	0.157472	0.0587554		-0.0587554	0.0987162	0.0587554	0.0987162	0.0034522	0.00974489		0	0	1	1	1	2
	37	0.338	-0.0168056	0.00949703		-0.00949703	-0.0263026	0.00949703	0.0263026	9.01936e-05	0.000691827		0	0	1	1	1	2
	39	0.361	0.0928122	0.0553243		-0.0553243	0.0374879	0.0553243	0.0374879	0.00306078	0.00140534		0	0	1	1	1	2
	40	0.237	-0.0317362	0.00870965		-0.00870965	-0.0404458	0.00870965	0.0404458	7.58581e-05	0.00163587		0	0	1	1	1	2
	41	0.284	-0.0312749	0.013685		-0.013685	-0.0449599	0.013685	0.0449599	0.000187279	0.00202139		0	0	1	1	1	2
	48	0.348	-0.0181172	0.00844444		-0.00844444	-0.0265616	0.00844444	0.0265616	7.13086e-05	0.000705521		0	0	1	1	1	2
	49	0.281	-0.0272742	0.00371741		-0.00371741	-0.0309916	0.00371741	0.0309916	1.38191e-05	0.000960477		0	0	1	1	1	2
	50	0.215	0.0917592	0.025309		-0.025309	0.0664502	0.025309	0.0664502	0.000640547	0.00441563		0	0	1	1	1	2
	52	0.227	0.104583	0.0701049		-0.0701049	0.0344778	0.0701049	0.0344778	0.00491469	0.00118872		0	0	1	1	1	2
	53	0.266	-0.0359099	0.0120383		-0.0120383	-0.0479482	0.0120383	0.0479482	0.00014492	0.00229903		0	0	1	1	1	2
	54	0.513	-0.0276101	0.010861		-0.010861	-0.0384711	0.010861	0.0384711	0.000117962	0.00148003		0	0	1	1	1	2
	56	0.457	0.0199219	0.0088847		-0.0088847	0.0110372	0.0088847	0.0110372	7.89379e-05	0.00012182		0	0	1	1	1	2
	57	0.333	0.0557334	0.0226257		-0.0226257	0.0331077	0.0226257	0.0331077	0.000511924	0.00109612		0	0	1	1	1	2
	58	0.263	0.290234	0.0624552		-0.0624552	0.227779	0.0624552	0.227779	0.00390065	0.0518833		0	0	1	1	1	2
	60	0.336	-0.0184255	0.00970364		-0.00970364	-0.0281292	0.00970364	0.0281292	9.41606e-05	0.00079125		0	0	1	1	1	2
	61	0.356	0.129686	0.0409851		-0.0409851	0.0887012	0.0409851	0.0887012	0.00167978	0.0078679		0	0	1	1	1	2
	62	0.378	-0.00487936	0.00412187		-0.00412187	-0.00900123	0.00412187	0.00900123	1.69898e-05	8.10222e-05		0	0	1	1	1	2
	64	0.363	0.00106398	0.0100016		-0.0100016	-0.00893762	0.0100016	0.00893762	0.000100032	7.98811e-05		0	0	1	1	1	2
	65	0.379	0.19914	0.0452644		-0.0452644	0.153875	0.0452644	0.153875	0.00204887	0.0236775		0	0	1	1	1	2
	66	0.677	0.285839	0.0148254		-0.0148254	0.271013	0.0148254	0.271013	0.000219793	0.0734482		0	0	1	1	1	2
	68	0.423	0.0846651	0.0302437		-0.0302437	0.0544214	0.0302437	0.0544214	0.000914679	0.00296169		0	0	1	1	1	2
	69	0.392	0.298804	0.0951853		-0.0951853	0.203619	0.0951853	0.203619	0.00906024	0.0414605		0	0	1	1	1	2
	70	0.443	-0.0164005	0.0175853		-0.0175853	-0.0339858	0.0175853	0.0339858	0.000309244	0.00115504		0	0	1	1	1	2
	72	0.368	-0.00354538	0.00431722		-0.00431722	-0.0078626	0.00431722	0.0078626	1.86384e-05	6.18205e-05		0	0	1	1	1	2
	73	0.662	-0.00759144	0.00173148		-0.00173148	-0.00932292	0.00173148	0.00932292	2.99802e-06	8.69169e-05		0	0	1	1	1	2
	74	0.5	0.114627	0.0112868		-0.0112868	0.10334	0.0112868	0.10334	0.000127392	0.0106792		0	0	1	1	1	2
	76	0.438	-0.0258656	0.00102159		-0.00102159	-0.0268871	0.00102159	0.0268871	1.04364e-06	0.000722918		0	0	1	1	1	2
	77	0.323	0.123882	0.050774		-0.050774	0.0731083	0.050774	0.0731083	0.002578	0.00534482		0	0	1	1	1	2
	78	0.235	-0.0240894	0.0115603		-0.0115603	-0.0356497	0.0115603	0.0356497	0.000133641	0.0012709		0	0	1	1	1	2
	80	0.463	-0.0207233	0.0118077		-0.0118077	-0.032531	0.0118077	0.032531	0.000139422	0.00105827		0	0	1	1	1	2
	81	0.353	-0.0186683	0.0118623		-0.0118623	-0.0305306	0.0118623	0.0305306	0.000140714	0.00093212		0	0	1	1	1	2
	82	0.487	0.149148	0.0557988		-0.0557988	0.0933489	0.0557988	0.0933489	0.00311351	0.00871402		0	0	1	1	1	2
	84	-0.016	0.179048	0.225689		-0.225689	-0.0466415	0.225689	0.0466415	0.0509356	0.00217543		0	1	2	0	0	1
	85	0.167	0.174601	0.274223		-0.274223	-0.0996228	0.274223	0.0996228	0.0751985	0.0099247		0	1	2	0	0	1
	86	0.067	0.164437	0.219399		-0.219399	-0.0549613	0.219399	0.0549613	0.0481358	0.00302075		0	1	2	0	0	1
	87	0.17	0.172892	0.225803		-0.225803	-0.0529105	0.225803	0.0529105	0.0509869	0.00279952		0	1	2	0	0	1
	88	0.244	0.225305	0.1997		-0.1997	0.0256049	0.1997	0.0256049	0.0398802	0.000655613		0	1	2	0	0	1
	89	0.332	0.17326	0.278595		-0.278595	-0.105335	0.278595	0.105335	0.077615	0.0110954		0	1	2	0	0	1
37	6	7.703	0.0762889	0.0210899		-0.0210899	0.055199	0.0210899	0.055199	0.000444784	0.00304693		0	0	0	0	1	3
	9	8.441	0.0906728	0.0469385		-0.0469385	0.0437342	0.0469385	0.0437342	0.00220323	0.00191268		0	0	0	0	1	3
	13	8.456	0.0910883	0.0463968		-0.0463968	0.0446916	0.0463968	0.0446916	0.00215266	0.00199733		0	0	0	0	1	3
	16	7.716	0.0765592	0.0209154		-0.0209154	0.0556438	0.0209154	0.0556438	0.000437452	0.00309623		0	0	0	0	1	3
	21	7.513	-0.00449558	0.00966771		-0.00966771	-0.0141633	0.00966771	0.0141633	9.34645e-05	0.000200599		0	0	0	0	0	3
	24	7.928	0.0663574	0.0227126		-0.0227126	0.0436448	0.0227126	0.0436448	0.000515861	0.00190487		0	0	0	0	0	3
	27	7.66	0.00825572	0.0138149		-0.0138149	-0.00555922	0.0138149	0.00555922	0.000190853	3.09049e-05		0	0	0	0	0	3
	30	1.646	-0.0111575	-0.00336947		0.00336947	-0.00778803	0.00336947	0.00778803	1.13533e-05	6.06535e-05		0	0	0	0	0	3
	31	1.065	-0.0106525	-8.69953e-05		8.69953e-05	-0.0105655	8.69953e-05	0.0105655	7.56819e-09	0.00011163		0	0	0	0	0	3
	32	1.302	-0.0108552	-0.00100737		0.00100737	-0.00984782	0.00100737	0.00984782	1.01478e-06	9.69795e-05		0	0	0	0	0	3
	34	1.322	-0.0109571	0.00135758		-0.00135758	-0.0123147	0.00135758	0.0123147	1.84301e-06	0.000151652		0	0	0	0	0	3
	35	0.806	-0.010165	-0.00404813		0.00404813	-0.00611683	0.00404813	0.00611683	1.63874e-05	3.74156e-05		0	0	0	0	0	3
	36	1.915	-0.00965614	-0.00406378		0.00406378	-0.00559235	0.00406378	0.00559235	1.65143e-05	3.12744e-05		0	0	0	0	0	3
	38	1.395	-0.0106097	-0.0170068		0.0170068	0.0063971	0.0170068	0.0063971	0.000289231	4.09228e-05		0	0	0	0	0	3
	39	1.385	-0.0106486	-0.00326739		0.00326739	-0.00738124	0.00326739	0.00738124	1.06759e-05	5.44826e-05		0	0	0	0	0	3
	40	1.157	-0.0110334	-0.00102224		0.00102224	-0.0100111	0.00102224	0.0100111	1.04497e-06	0.000100222		0	0	0	0	0	3
	43	1.2	-0.0110281	-0.000883532		0.000883532	-0.0101445	0.000883532	0.0101445	7.80628e-07	0.000102912		0	0	0	0	0	3
	44	1.379	-0.0107763	-0.0105209		0.0105209	-0.000255438	0.0105209	0.000255438	0.000110689	6.52485e-08		0	0	0	0	0	3
	45	1.578	-0.0111144	-4.19724e-05		4.19724e-05	-0.0110724	4.19724e-05	0.0110724	1.76168e-09	0.000122598		0	0	0	0	0	3
	47	1.309	-0.0109068	-0.00286722		0.00286722	-0.00803962	0.00286722	0.00803962	8.22095e-06	6.46356e-05		0	0	0	0	0	3
	48	1.298	-0.0108931	-0.000814767		0.000814767	-0.0100784	0.000814767	0.0100784	6.63845e-07	0.000101573		0	0	0	0	0	3
	49	1.579	-0.0109275	-0.00405923		0.00405923	-0.00686825	0.00405923	0.00686825	1.64773e-05	4.71728e-05		0	0	0	0	0	3
	51	1.602	-0.0105232	-0.0018853		0.0018853	-0.00863787	0.0018853	0.00863787	3.55435e-06	7.46128e-05		0	0	0	0	0	3
	52	1.479	-0.0109568	0.000366369		-0.000366369	-0.0113232	0.000366369	0.0113232	1.34226e-07	0.000128215		0	0	0	0	0	3
	53	0.848	-0.00520449	-0.000796861		0.000796861	-0.00440763	0.000796861	0.00440763	6.34987e-07	1.94272e-05		0	0	0	0	0	3
	56	1.457	-0.0100999	0.0139218		-0.0139218	-0.0240216	0.0139218	0.0240216	0.000193815	0.000577039		0	0	0	0	0	3
	57	1.577	-0.0108201	-0.00273131		0.00273131	-0.00808874	0.00273131	0.00808874	7.46005e-06	6.54278e-05		0	0	0	0	0	3
	58	1.248	-0.0109509	-0.00597033		0.00597033	-0.00498061	0.00597033	0.00498061	3.56449e-05	2.48065e-05		0	0	0	0	0	3
	60	1.41	-0.0102012	0.00430588		-0.00430588	-0.014507	0.00430588	0.014507	1.85406e-05	0.000210454		0	0	0	0	0	3
	61	1.711	-0.0104763	-9.62309e-07		9.62309e-07	-0.0104753	9.62309e-07	0.0104753	9.26038e-13	0.000109732		0	0	0	0	0	3
	62	1.788	-0.0104461	-9.18637e-05		9.18637e-05	-0.0103543	9.18637e-05	0.0103543	8.43894e-09	0.000107211		0	0	0	0	0	3
	64	1.188	-0.0109647	-0.00618565		0.00618565	-0.00477901	0.00618565	0.00477901	3.82623e-05	2.28389e-05		0	0	0	0	0	3
	65	1.508	-0.0108355	-0.00263071		0.00263071	-0.00820479	0.00263071	0.00820479	6.92065e-06	6.73186e-05		0	0	0	0	0	3
	66	1.363	-0.0101664	0.0138011		-0.0138011	-0.0239676	0.0138011	0.0239676	0.000190471	0.000574444		0	0	0	0	0	3
	69	1.577	-0.0108121	-0.00268344		0.00268344	-0.00812868	0.00268344	0.00812868	7.20083e-06	6.60755e-05		0	0	0	0	0	3
	70	1.195	-0.0109584	-0.00623785		0.00623785	-0.00472058	0.00623785	0.00472058	3.89108e-05	2.22839e-05		0	0	0	0	0	3
	71	1.377	-0.0101738	0.0136151		-0.0136151	-0.023789	0.0136151	0.023789	0.000185371	0.000565915		0	0	0	0	0	3
	73	1.245	-0.0109611	-0.00587762		0.00587762	-0.00508346	0.00587762	0.00508346	3.45464e-05	2.58415e-05		0	0	0	0	0	3
	74	1.53	-0.0108359	-0.00266549		0.00266549	-0.00817037	0.00266549	0.00817037	7.10486e-06	6.67549e-05		0	0	0	0	0	3
	75	1.43	-0.0101206	0.0139727		-0.0139727	-0.0240934	0.0139727	0.0240934	0.000195238	0.00058049		0	0	0	0	0	3
	77	1.741	-0.0104665	0.000158532		-0.000158532	-0.0106251	0.000158532	0.0106251	2.51324e-08	0.000112892		0	0	0	0	0	3
	78	1.414	-0.0101913	0.00435351		-0.00435351	-0.0145448	0.00435351	0.0145448	1.89531e-05	0.00021155		0	0	0	0	0	3
	79	1.8	-0.0104339	-0.000223667		0.000223667	-0.0102102	0.000223667	0.0102102	5.00271e-08	0.000104249		0	0	0	0	0	3
	82	7.664	0.0123964	0.0171201		-0.0171201	-0.00472372	0.0171201	0.00472372	0.000293098	2.23135e-05		0	0	0	0	0	3
	85	8.135	0.0676134	0.02284		-0.02284	0.0447734	0.02284	0.0447734	0.000521667	0.00200465		0	0	0	0	0	3
	88	7.571	-0.00563202	0.00499905		-0.00499905	-0.0106311	0.00499905	0.0106311	2.49905e-05	0.00011302		0	0	0	0	0	3
	91	1.501	-0.0110119	0.00254433		-0.00254433	-0.0135562	0.00254433	0.0135562	6.4736e-06	0.000183772		0	0	0	0	0	3
	92	0.889	-0.00783698	-0.00110422		0.00110422	-0.00673275	0.00110422	0.00673275	1.21931e-06	4.533e-05		0	0	0	0	0	3
	93	1.532	-0.0105271	-0.00147869		0.00147869	-0.00904842	0.00147869	0.00904842	2.18653e-06	8.18739e-05		0	0	0	0	0	3
	95	1.551	-0.011108	5.58899e-05		-5.58899e-05	-0.0111639	5.58899e-05	0.0111639	3.12368e-09	0.000124633		0	0	0	0	0	3
	96	1.234	-0.0110247	-0.000933975		0.000933975	-0.0100908	0.000933975	0.0100908	8.7231e-07	0.000101823		0	0	0	0	0	3
	97	1.366	-0.0107921	-0.0117682		0.0117682	0.000976193	0.0117682	0.000976193	0.000138492	9.52952e-07		0	0	0	0	0	3
	99	1.401	-0.0108563	-0.00107024		0.00107024	-0.00978603	0.00107024	0.00978603	1.14541e-06	9.57664e-05		0	0	0	0	0	3
	100	1.678	-0.0108594	-0.0043877		0.0043877	-0.00647172	0.0043877	0.00647172	1.92519e-05	4.18832e-05		0	0	0	0	0	3
	101	1.494	-0.0109309	-0.00317416		0.00317416	-0.00775674	0.00317416	0.00775674	1.00753e-05	6.0167e-05		0	0	0	0	0	3
	104	1.391	-0.0106307	-0.00301046		0.00301046	-0.0076202	0.00301046	0.0076202	9.06289e-06	5.80675e-05		0	0	0	0	0	3
	105	1.134	-0.0110438	-0.000628033		0.000628033	-0.0104158	0.000628033	0.0104158	3.94426e-07	0.000108488		0	0	0	0	0	3
	106	1.483	-0.0105985	-0.0167708		0.0167708	0.00617222	0.0167708	0.00617222	0.000281259	3.80963e-05		0	0	0	0	0	3
	108	1.661	-0.0111287	-0.00404898		0.00404898	-0.00707974	0.00404898	0.00707974	1.63942e-05	5.01227e-05		0	0	0	0	0	3
	109	1.035	-0.0103179	-3.85818e-05		3.85818e-05	-0.0102793	3.85818e-05	0.0102793	1.48856e-09	0.000105664		0	0	0	0	0	3
	110	1.311	-0.010743	-0.00125301		0.00125301	-0.00949003	0.00125301	0.00949003	1.57002e-06	9.00607e-05		0	0	0	0	0	3
	112	1.488	-0.0108821	0.0011594		-0.0011594	-0.0120415	0.0011594	0.0120415	1.34422e-06	0.000144999		0	0	0	0	0	3
	113	0.738	-0.0102165	-0.00318788		0.00318788	-0.00702862	0.00318788	0.00702862	1.01625e-05	4.94015e-05		0	0	0	0	0	3
	114	2.088	-0.00990934	-0.00406376		0.00406376	-0.00584558	0.00406376	0.00584558	1.65141e-05	3.41708e-05		0	0	0	0	0	3
38	9	1.261	-0.0113261	-0.00727387		0.00727387	-0.00405224	0.00727387	0.00405224	5.29092e-05	1.64206e-05		0	0	0	1	0	3
	10	1.283	-0.0113261	-0.0103857		0.0103857	-0.000940366	0.0103857	0.000940366	0.000107863	8.84288e-07		0	0	0	1	0	3
	11	0.911	-0.0103564	0.00573853		-0.00573853	-0.0160949	0.00573853	0.0160949	3.29307e-05	0.000259047		0	0	0	1	0	3
	13	1.553	-0.0113277	0.00211028		-0.00211028	-0.013438	0.00211028	0.013438	4.45329e-06	0.00018058		0	0	0	1	0	3
	14	1.237	-0.0112283	-0.0112269		0.0112269	-1.38508e-06	0.0112269	1.38508e-06	0.000126043	1.91844e-12		0	0	0	1	0	3
	15	1.424	-0.0113263	0.0213158		-0.0213158	-0.0326421	0.0213158	0.0326421	0.000454362	0.0010655		0	0	0	1	0	3
	17	1.712	-0.0113296	0.0136651		-0.0136651	-0.0249947	0.0136651	0.0249947	0.000186736	0.000624734		0	0	0	1	0	3
	18	0.997	-0.0108954	0.0138781		-0.0138781	-0.0247735	0.0138781	0.0247735	0.000192602	0.000613725		0	0	0	1	0	3
	19	1.217	-0.0113324	-0.000320936		0.000320936	-0.0110115	0.000320936	0.0110115	1.03e-07	0.000121253		0	0	0	1	0	3
	21	3.782	0.0455926	0.00104859		-0.00104859	0.044544	0.00104859	0.044544	1.09954e-06	0.00198417		0	0	1	0	0	2
	22	3.494	0.0611975	0.126978		-0.126978	-0.0657806	0.126978	0.0657806	0.0161234	0.00432709		0	0	1	0	0	2
	25	0.898	-0.0109952	-0.00134936		0.00134936	-0.00964585	0.00134936	0.00964585	1.82077e-06	9.30424e-05		0	0	0	1	0	3
	26	0.757	-0.0113446	-0.00147952		0.00147952	-0.00986511	0.00147952	0.00986511	2.18897e-06	9.73204e-05		0	0	0	1	0	3
	27	2.317	-0.0112165	0.0082203		-0.0082203	-0.0194368	0.0082203	0.0194368	6.75733e-05	0.00037779		0	0	0	1	0	3
	29	0.709	-0.0112273	0.00593597		-0.00593597	-0.0171632	0.00593597	0.0171632	3.52357e-05	0.000294577		0	0	0	1	0	3
	30	1.186	-0.0107121	-0.010824		0.010824	0.000111868	0.010824	0.000111868	0.000117159	1.25145e-08		0	0	0	1	0	3
	31	0.913	-0.0109026	-0.00205009		0.00205009	-0.00885255	0.00205009	0.00885255	4.20288e-06	7.83677e-05		0	0	0	1	0	3
	34	2.307	-0.00405116	0.0337957		-0.0337957	-0.0378469	0.0337957	0.0378469	0.00114215	0.00143238		0	0	1	0	0	2
	35	3.006	0.0245213	-0.00213197		0.00213197	0.0266532	0.00213197	0.0266532	4.54531e-06	0.000710395		0	0	1	0	0	2
	37	1.282	-0.011326	-0.0129112		0.0129112	0.00158522	0.0129112	0.00158522	0.0001667	2.51293e-06		0	0	0	1	0	3
	38	0.842	-0.0111647	0.0261645		-0.0261645	-0.0373293	0.0261645	0.0373293	0.000684584	0.00139347		0	0	0	1	0	3
	39	1.166	-0.0113129	-6.36259e-06		6.36259e-06	-0.0113065	6.36259e-06	0.0113065	4.04826e-11	0.000127837		0	0	0	1	0	3
	41	1.367	-0.0113335	0.00083187		-0.00083187	-0.0121654	0.00083187	0.0121654	6.92007e-07	0.000147997		0	0	0	1	0	3
	42	1.772	-0.0112739	0.012003		-0.012003	-0.023277	0.012003	0.023277	0.000144073	0.000541818		0	0	0	1	0	3
	43	0.874	-0.0111957	0.0122542		-0.0122542	-0.0234498	0.0122542	0.0234498	0.000150164	0.000549894		0	0	0	1	0	3
	46	2.633	0.0144452	0.00833166		-0.00833166	0.00611351	0.00833166	0.00611351	6.94165e-05	3.7375e-05		0	0	1	0	0	2
	47	2.457	0.022239	0.0270608		-0.0270608	-0.00482183	0.0270608	0.00482183	0.000732287	2.325e-05		0	0	1	0	0	2
	49	1.724	-0.0110806	0.00229447		-0.00229447	-0.013375	0.00229447	0.013375	5.26459e-06	0.000178891		0	0	0	1	0	3
	50	1.341	-0.0113282	-0.00662805		0.00662805	-0.00470013	0.00662805	0.00470013	4.39311e-05	2.20912e-05		0	0	0	1	0	3
	51	0.844	-0.0111766	0.0225742		-0.0225742	-0.0337508	0.0225742	0.0337508	0.000509594	0.00113912		0	0	0	1	0	3
	53	1.45	-0.0113269	-0.0108806		0.0108806	-0.000446341	0.0108806	0.000446341	0.000118387	1.9922e-07		0	0	0	1	0	3
	54	0.866	-0.0113308	0.00755075		-0.00755075	-0.0188815	0.00755075	0.0188815	5.70138e-05	0.000356512		0	0	0	1	0	3
	55	1.008	-0.0111411	0.0160823		-0.0160823	-0.0272234	0.0160823	0.0272234	0.00025864	0.000741112		0	0	0	1	0	3
39	1	5.003	0.338307	0.343662		-0.343662	-0.00535508	0.343662	0.00535508	0.118103	2.86769e-05		1	0	0	0	0	1
	3	5.123	0.350796	0.30418		-0.30418	0.0466156	0.30418	0.0466156	0.0925257	0.00217301		1	0	0	0	0	1
	6	7.879	0.0715436	0.0392576		-0.0392576	0.032286	0.0392576	0.032286	0.00154116	0.00104238		0	0	1	0	0	2
	8	7.668	0.0343254	0.0165885		-0.0165885	0.0177369	0.0165885	0.0177369	0.000275179	0.000314598		0	0	0	1	0	3
	10	7.666	-0.00306299	0.0146131		-0.0146131	-0.017676	0.0146131	0.017676	0.000213541	0.000312442		0	0	0	0	1	3
	12	7.657	0.034125	0.0105146		-0.0105146	0.0236104	0.0105146	0.0236104	0.000110557	0.000557453		0	0	0	1	0	3
	14	7.887	0.0694375	0.0602603		-0.0602603	0.00917717	0.0602603	0.00917717	0.0036313	8.42205e-05		0	0	1	0	0	2
	15	5.126	0.364436	0.246441		-0.246441	0.117995	0.246441	0.117995	0.0607332	0.0139227		1	0	0	0	0	1
40	5	7.516	0.072266	0.0262487		-0.0262487	0.0460173	0.0262487	0.0460173	0.000688995	0.00211759		0	0	0	1	0	3
	7	7.662	0.0182841	0.0130497		-0.0130497	0.00523444	0.0130497	0.00523444	0.000170294	2.73993e-05		0	0	0	0	1	3
	11	7.247	0.0963214	0.0196648		-0.0196648	0.0766566	0.0196648	0.0766566	0.000386704	0.00587623		0	0	0	0	0	3
	14	7.44	0.0879164	0.0155204		-0.0155204	0.0723959	0.0155204	0.0723959	0.000240884	0.00524117		0	0	0	0	0	3
	17	2.595	0.0452904	-0.00262678		0.00262678	0.0479171	0.00262678	0.0479171	6.9e-06	0.00229605		0	0	0	0	0	3
	19	1.144	-0.01035	-0.00553982		0.00553982	-0.00481015	0.00553982	0.00481015	3.06896e-05	2.31376e-05		0	0	0	0	0	3
	20	1.034	-0.0111173	-0.0044268		0.0044268	-0.00669053	0.0044268	0.00669053	1.95965e-05	4.47631e-05		0	0	0	0	0	3
	21	1.027	-0.00957906	-0.00401159		0.00401159	-0.00556747	0.00401159	0.00556747	1.60928e-05	3.09968e-05		0	0	0	0	0	3
	23	1.119	-0.00980595	-0.00419535		0.00419535	-0.00561061	0.00419535	0.00561061	1.7601e-05	3.14789e-05		0	0	0	0	0	3
	24	0.843	-0.00860156	-0.00187147		0.00187147	-0.00673009	0.00187147	0.00673009	3.50241e-06	4.52941e-05		0	0	0	0	0	3
	25	1.086	-0.0112277	0.00030781		-0.00030781	-0.0115356	0.00030781	0.0115356	9.47472e-08	0.000133069		0	0	0	0	0	3
	27	2.834	-0.00126749	-0.000684575		0.000684575	-0.000582918	0.000684575	0.000582918	4.68642e-07	3.39794e-07		0	0	0	0	0	3
	29	1.209	-0.0108903	-0.00524432		0.00524432	-0.00564594	0.00524432	0.00564594	2.75028e-05	3.18766e-05		0	0	0	0	0	3
	30	1.184	-0.0112176	-0.00395165		0.00395165	-0.00726596	0.00395165	0.00726596	1.56155e-05	5.27942e-05		0	0	0	0	0	3
	31	1.254	-0.0094578	-0.00354241		0.00354241	-0.0059154	0.00354241	0.0059154	1.25486e-05	3.49919e-05		0	0	0	0	0	3
	33	1.356	-0.0103164	-0.00522947		0.00522947	-0.00508692	0.00522947	0.00508692	2.73473e-05	2.58767e-05		0	0	0	0	0	3
	34	1.278	-0.00796774	-0.00327836		0.00327836	-0.00468938	0.00327836	0.00468938	1.07477e-05	2.19903e-05		0	0	0	0	0	3
	35	1.234	-0.0107805	-0.00388694		0.00388694	-0.0068936	0.00388694	0.0068936	1.51083e-05	4.75217e-05		0	0	0	0	0	3
	37	2.849	0.0437058	0.000893813		-0.000893813	0.042812	0.000893813	0.042812	7.98901e-07	0.00183286		0	0	0	0	0	3
	39	1.285	-0.00948337	-0.00919671		0.00919671	-0.000286656	0.00919671	0.000286656	8.45795e-05	8.21719e-08		0	0	0	0	0	3
	40	1.317	-0.0112566	0.00535374		-0.00535374	-0.0166104	0.00535374	0.0166104	2.86626e-05	0.000275905		0	0	0	0	0	3
	41	1.114	-0.00969808	-0.00469976		0.00469976	-0.00499832	0.00469976	0.00499832	2.20877e-05	2.49832e-05		0	0	0	0	0	3
	43	1.016	-0.00994078	-0.00432832		0.00432832	-0.00561246	0.00432832	0.00561246	1.87344e-05	3.14997e-05		0	0	0	0	0	3
	44	1.151	-0.0110723	-0.00252557		0.00252557	-0.00854678	0.00252557	0.00854678	6.37848e-06	7.30474e-05		0	0	0	0	0	3
	45	0.785	-0.0106647	-0.0039668		0.0039668	-0.00669787	0.0039668	0.00669787	1.57355e-05	4.48615e-05		0	0	0	0	0	3
	46	3.547	0.677668	0.315028		-0.315028	0.36264	0.315028	0.36264	0.0992426	0.131508		1	0	0	0	0	1
	47	4.44	0.676082	0.206181		-0.206181	0.469901	0.206181	0.469901	0.0425106	0.220807		1	0	0	0	0	1
	50	7.511	0.072127	0.0260476		-0.0260476	0.0460794	0.0260476	0.0460794	0.000678477	0.00212331		0	0	0	1	0	3
	54	7.437	0.0878334	0.0155118		-0.0155118	0.0723217	0.0155118	0.0723217	0.000240616	0.00523042		0	0	0	0	0	3
	57	7.24	0.0961925	0.019634		-0.019634	0.0765586	0.019634	0.0765586	0.000385493	0.00586121		0	0	0	0	0	3
	60	2.856	0.0433198	0.000929379		-0.000929379	0.0423904	0.000929379	0.0423904	8.63745e-07	0.00179695		0	0	0	0	0	3
	62	1.277	-0.00950919	-0.00904498		0.00904498	-0.00046421	0.00904498	0.00046421	8.18117e-05	2.15491e-07		0	0	0	0	0	3
	63	1.295	-0.0112592	0.00540064		-0.00540064	-0.0166598	0.00540064	0.0166598	2.91669e-05	0.000277549		0	0	0	0	0	3
	64	1.11	-0.00972697	-0.00474615		0.00474615	-0.00498082	0.00474615	0.00498082	2.2526e-05	2.48085e-05		0	0	0	0	0	3
	66	1.157	-0.0110744	-0.00252674		0.00252674	-0.00854766	0.00252674	0.00854766	6.38441e-06	7.30624e-05		0	0	0	0	0	3
	67	0.78	-0.0106694	-0.00395219		0.00395219	-0.00671718	0.00395219	0.00671718	1.56198e-05	4.51206e-05		0	0	0	0	0	3
	68	1.016	-0.00993622	-0.00431148		0.00431148	-0.00562474	0.00431148	0.00562474	1.85889e-05	3.16377e-05		0	0	0	0	0	3
	70	2.829	-0.00134072	-0.000678587		0.000678587	-0.00066213	0.000678587	0.00066213	4.60481e-07	4.38416e-07		0	0	0	0	0	3
	72	1.25	-0.00947286	-0.00354873		0.00354873	-0.00592413	0.00354873	0.00592413	1.25935e-05	3.50953e-05		0	0	0	0	0	3
	73	1.204	-0.0108887	-0.00524239		0.00524239	-0.00564636	0.00524239	0.00564636	2.74826e-05	3.18814e-05		0	0	0	0	0	3
	74	1.18	-0.0112178	-0.00394991		0.00394991	-0.0072679	0.00394991	0.0072679	1.56018e-05	5.28224e-05		0	0	0	0	0	3
	76	1.274	-0.00797968	-0.00326244		0.00326244	-0.00471724	0.00326244	0.00471724	1.06435e-05	2.22524e-05		0	0	0	0	0	3
	77	1.23	-0.010783	-0.00388918		0.00388918	-0.00689386	0.00388918	0.00689386	1.51258e-05	4.75253e-05		0	0	0	0	0	3
	78	1.349	-0.0103183	-0.0052183		0.0052183	-0.00509997	0.0052183	0.00509997	2.72306e-05	2.60097e-05		0	0	0	0	0	3
	80	2.601	0.0453745	-0.00248605		0.00248605	0.0478606	0.00248605	0.0478606	6.18042e-06	0.00229063		0	0	0	0	0	3
	82	1.029	-0.00955912	-0.00398375		0.00398375	-0.00557537	0.00398375	0.00557537	1.58703e-05	3.10848e-05		0	0	0	0	0	3
	83	1.174	-0.0103337	-0.005564		0.005564	-0.00476966	0.005564	0.00476966	3.09581e-05	2.27497e-05		0	0	0	0	0	3
	84	1.039	-0.0111082	-0.00446557		0.00446557	-0.00664267	0.00446557	0.00664267	1.99413e-05	4.41251e-05		0	0	0	0	0	3
	86	0.834	-0.00858874	-0.00188024		0.00188024	-0.0067085	0.00188024	0.0067085	3.5353e-06	4.5004e-05		0	0	0	0	0	3
	87	1.061	-0.0112347	0.000471073		-0.000471073	-0.0117058	0.000471073	0.0117058	2.2191e-07	0.000137025		0	0	0	0	0	3
	88	1.086	-0.00985765	-0.00414179		0.00414179	-0.00571587	0.00414179	0.00571587	1.71544e-05	3.26711e-05		0	0	0	0	0	3
	89	3.537	0.681104	0.315416		-0.315416	0.365688	0.315416	0.365688	0.099487	0.133728		1	0	0	0	0	1
42	11	7.303	0.0237755	-0.377634		0.377634	0.401409	0.377634	0.401409	0.142607	0.161129		0	0	0	1	0	3
	13	7.623	0.0136865	-0.233704		0.233704	0.247391	0.233704	0.247391	0.0546178	0.0612023		0	0	0	0	1	3
	15	7.731	0.0319394	-0.64442		0.64442	0.676359	0.64442	0.676359	0.415277	0.457462		0	0	0	1	0	3
	17	8.426	0.0624121	-0.133334		0.133334	0.195746	0.133334	0.195746	0.0177779	0.0383165		0	0	1	0	0	2
	19	4.173	-0.0133698	-1.23968		1.23968	1.22631	1.23968	1.22631	1.53681	1.50384		0	0	1	0	0	2
	20	3.282	0.0400034	-1.34997		1.34997	1.38997	1.34997	1.38997	1.82241	1.93201		0	0	1	0	0	2
	22	2.613	-0.00804582	0.563962		-0.563962	-0.572008	0.563962	0.572008	0.318053	0.327193		0	0	1	0	0	2
	23	2.776	-0.00241008	0.320746		-0.320746	-0.323156	0.320746	0.323156	0.102878	0.10443		0	0	1	0	0	2
	24	2.323	-0.0137133	0.776364		-0.776364	-0.790077	0.776364	0.790077	0.602741	0.624222		0	0	1	0	0	2
	26	2.55	-0.0106106	-0.444516		0.444516	0.433906	0.444516	0.433906	0.197595	0.188274		0	0	1	0	0	2
	27	3.064	-0.0120369	-0.137113		0.137113	0.125076	0.137113	0.125076	0.0187999	0.015644		0	0	1	0	0	2
	28	1.651	-0.017886	-0.553812		0.553812	0.535926	0.553812	0.535926	0.306708	0.287217		0	0	1	0	0	2
	30	1.365	0.110453	0.050789		-0.050789	0.0596635	0.050789	0.0596635	0.00257952	0.00355973		0	1	0	0	0	1
	31	1.043	0.136363	0.165121		-0.165121	-0.0287585	0.165121	0.0287585	0.027265	0.000827049		0	1	0	0	0	1
	32	1.414	0.0924853	0.158859		-0.158859	-0.0663742	0.158859	0.0663742	0.0252363	0.00440553		0	1	0	0	0	1
	35	4.24	-0.0514677	0.0259391		-0.0259391	-0.0774068	0.0259391	0.0774068	0.000672835	0.00599181		0	0	0	0	1	3
	36	2.93	-0.00578457	0.517463		-0.517463	-0.523247	0.517463	0.523247	0.267768	0.273788		0	0	0	0	1	3
	38	1.7	-0.0112767	0.416999		-0.416999	-0.428276	0.416999	0.428276	0.173888	0.18342		0	0	0	0	0	3
	39	0.71	-0.0116071	-0.0143445		0.0143445	0.00273732	0.0143445	0.00273732	0.000205763	7.4929e-06		0	0	0	0	0	3
	40	1.002	-0.0110524	0.0333379		-0.0333379	-0.0443903	0.0333379	0.0443903	0.00111142	0.0019705		0	0	0	0	0	3
	42	4.373	-0.04638	0.58132		-0.58132	-0.6277	0.58132	0.6277	0.337932	0.394007		0	0	0	0	1	3
	43	3.049	-0.00370923	-0.33508		0.33508	0.33137	0.33508	0.33137	0.112278	0.109806		0	0	0	0	1	3
	45	0.89	-0.0111844	-0.202663		0.202663	0.191478	0.202663	0.191478	0.0410721	0.0366639		0	0	0	0	0	3
	46	1.727	-0.0113337	-0.142001		0.142001	0.130668	0.142001	0.130668	0.0201644	0.017074		0	0	0	0	0	3
	47	0.775	-0.0113978	-0.0593498		0.0593498	0.0479521	0.0593498	0.0479521	0.0035224	0.0022994		0	0	0	0	0	3
43	8	8.708	0.0261019	0.0200569		-0.0200569	0.00604498	0.0200569	0.00604498	0.00040228	3.65418e-05		0	0	0	1	1	3
	10	8.937	0.0314296	0.0381812		-0.0381812	-0.00675162	0.0381812	0.00675162	0.0014578	4.55844e-05		0	0	0	0	1	3
	12	8.726	0.0268813	0.0203746		-0.0203746	0.00650667	0.0203746	0.00650667	0.000415126	4.23367e-05		0	0	0	1	1	3
	16	2.893	-0.0294518	-0.0126003		0.0126003	-0.0168515	0.0126003	0.0168515	0.000158768	0.000283974		0	0	0	1	1	3
	17	2.52	-0.0190224	-0.0298405		0.0298405	0.010818	0.0298405	0.010818	0.000890453	0.00011703		0	0	0	1	1	3
	18	2.444	-0.0128879	0.0140817		-0.0140817	-0.0269696	0.0140817	0.0269696	0.000198294	0.000727358		0	0	0	1	1	3
	21	2.549	-0.0175326	-0.0277699		0.0277699	0.0102373	0.0277699	0.0102373	0.00077117	0.000104803		0	0	0	1	1	3
	22	2.907	-0.0292301	-0.0128607		0.0128607	-0.0163694	0.0128607	0.0163694	0.000165396	0.000267958		0	0	0	1	1	3
	23	2.441	-0.013121	0.01544		-0.01544	-0.028561	0.01544	0.028561	0.000238393	0.000815731		0	0	0	1	1	3
	27	7.846	0.0379474	0.0217486		-0.0217486	0.0161988	0.0217486	0.0161988	0.000473001	0.000262401		0	0	0	0	1	3
	29	7.955	0.0241583	0.0158598		-0.0158598	0.00829849	0.0158598	0.00829849	0.000251533	6.8865e-05		0	0	0	0	0	3
	31	7.856	0.0358362	0.0218913		-0.0218913	0.013945	0.0218913	0.013945	0.000479227	0.000194462		0	0	0	0	1	3
	34	2.683	0.0300868	-0.00232662		0.00232662	0.0324134	0.00232662	0.0324134	5.41317e-06	0.00105063		0	0	0	0	1	3
	36	1.414	-0.0105085	-0.00535734		0.00535734	-0.00515117	0.00535734	0.00515117	2.87011e-05	2.65346e-05		0	0	0	0	0	3
	37	1.358	-0.0109959	-0.00322134		0.00322134	-0.00777452	0.00322134	0.00777452	1.0377e-05	6.04431e-05		0	0	0	0	0	3
	38	0.971	-0.0108911	-0.00351849		0.00351849	-0.00737265	0.00351849	0.00737265	1.23798e-05	5.4356e-05		0	0	0	0	0	3
	40	1.408	-0.0112572	0.00404349		-0.00404349	-0.0153007	0.00404349	0.0153007	1.63498e-05	0.000234111		0	0	0	0	0	3
	41	1.221	-0.0110197	-0.00903664		0.00903664	-0.00198308	0.00903664	0.00198308	8.16608e-05	3.93259e-06		0	0	0	0	0	3
	42	1.157	-0.0108889	-0.00468854		0.00468854	-0.00620037	0.00468854	0.00620037	2.19824e-05	3.84446e-05		0	0	0	0	0	3
	44	2.591	0.0451294	-0.0160696		0.0160696	0.0611991	0.0160696	0.0611991	0.000258233	0.00374532		0	0	0	0	1	3
	46	1.614	-0.0111493	-0.00339751		0.00339751	-0.0077518	0.00339751	0.0077518	1.15431e-05	6.00904e-05		0	0	0	0	0	3
	47	1.181	-0.0108461	-0.00286815		0.00286815	-0.00797798	0.00286815	0.00797798	8.22626e-06	6.36481e-05		0	0	0	0	0	3
	48	1.234	-0.0112852	-0.0126047		0.0126047	0.0013195	0.0126047	0.0013195	0.00015888	1.74109e-06		0	0	0	0	0	3
	50	0.835	-0.0111946	-0.00415085		0.00415085	-0.00704373	0.00415085	0.00704373	1.72295e-05	4.96141e-05		0	0	0	0	0	3
	51	1.247	-0.011041	-0.00341146		0.00341146	-0.00762958	0.00341146	0.00762958	1.1638e-05	5.82105e-05		0	0	0	0	0	3
	52	1.348	-0.0110589	-0.00856833		0.00856833	-0.00249054	0.00856833	0.00249054	7.34163e-05	6.20281e-06		0	0	0	0	0	3
	56	7.879	0.0358127	0.0215955		-0.0215955	0.0142172	0.0215955	0.0142172	0.000466365	0.000202128		0	0	0	0	1	3
	58	7.936	0.0227743	0.0163651		-0.0163651	0.00640915	0.0163651	0.00640915	0.000267818	4.10772e-05		0	0	0	0	0	3
	60	7.751	0.037276	0.021972		-0.021972	0.015304	0.021972	0.015304	0.000482769	0.000234213		0	0	0	0	1	3
	63	2.785	0.0307561	-0.000127481		0.000127481	0.0308836	0.000127481	0.0308836	1.62515e-08	0.000953797		0	0	0	0	1	3
	65	1.344	-0.0105732	-0.00418815		0.00418815	-0.00638508	0.00418815	0.00638508	1.75406e-05	4.07693e-05		0	0	0	0	0	3
	66	0.93	-0.0109479	-0.00349226		0.00349226	-0.00745568	0.00349226	0.00745568	1.21959e-05	5.55872e-05		0	0	0	0	0	3
	67	1.316	-0.0110588	-0.00298095		0.00298095	-0.00807785	0.00298095	0.00807785	8.88604e-06	6.52516e-05		0	0	0	0	0	3
	69	1.22	-0.0110662	-0.00877737		0.00877737	-0.00228884	0.00877737	0.00228884	7.70422e-05	5.23877e-06		0	0	0	0	0	3
	70	1.362	-0.0112581	0.00316411		-0.00316411	-0.0144222	0.00316411	0.0144222	1.00116e-05	0.000208		0	0	0	0	0	3
	71	1.35	-0.0108036	-0.0046916		0.0046916	-0.006112	0.0046916	0.006112	2.20111e-05	3.73565e-05		0	0	0	0	0	3
	73	2.442	0.0451072	-0.0156877		0.0156877	0.0607949	0.0156877	0.0607949	0.000246103	0.00369602		0	0	0	0	1	3
	75	1.226	-0.0110052	-0.00350155		0.00350155	-0.00750365	0.00350155	0.00750365	1.22609e-05	5.63048e-05		0	0	0	0	0	3
	76	0.907	-0.0111789	-0.00403269		0.00403269	-0.0071462	0.00403269	0.0071462	1.62626e-05	5.10682e-05		0	0	0	0	0	3
	77	1.254	-0.011052	-0.00840347		0.00840347	-0.00264853	0.00840347	0.00264853	7.06183e-05	7.0147e-06		0	0	0	0	0	3
	79	1.189	-0.0107302	-0.00286467		0.00286467	-0.00786555	0.00286467	0.00786555	8.20632e-06	6.18668e-05		0	0	0	0	0	3
	80	1.59	-0.0111679	-0.00380791		0.00380791	-0.00735999	0.00380791	0.00735999	1.45002e-05	5.41694e-05		0	0	0	0	0	3
	81	1.341	-0.011294	-0.0120886		0.0120886	0.000794577	0.0120886	0.000794577	0.000146134	6.31352e-07		0	0	0	0	0	3
44	6	2.62	-0.0169173	0.299903		-0.299903	-0.31682	0.299903	0.31682	0.0899415	0.100375		0	0	0	1	0	3
	7	3.546	-0.0250553	0.22649		-0.22649	-0.251545	0.22649	0.251545	0.0512977	0.063275		0	0	0	1	0	3
	8	3	-0.0442713	0.0801926		-0.0801926	-0.124464	0.0801926	0.124464	0.00643085	0.0154913		0	0	0	1	0	3
	11	8.741	0.0159669	-0.0171165		0.0171165	0.0330834	0.0171165	0.0330834	0.000292974	0.00109451		0	0	0	1	0	3
	15	8.708	0.0137979	0.86492		-0.86492	-0.851123	0.86492	0.851123	0.748087	0.72441		0	0	0	1	0	3
	18	9.36	0.0455604	0.609705		-0.609705	-0.564145	0.609705	0.564145	0.37174	0.318259		0	0	1	0	0	2
	20	8.711	0.0038271	-4.10329		4.10329	4.10712	4.10329	4.10712	16.837	16.8684		0	0	0	1	0	3
	22	2.682	-0.0171276	-0.330721		0.330721	0.313593	0.330721	0.313593	0.109376	0.0983406		0	0	0	1	0	3
	23	2.856	-0.0301557	-0.255432		0.255432	0.225277	0.255432	0.225277	0.0652457	0.0507496		0	0	0	1	0	3
	24	2.887	-0.0214414	-0.124096		0.124096	0.102654	0.124096	0.102654	0.0153998	0.0105379		0	0	0	1	0	3
	26	8.966	0.0607296	0.728018		-0.728018	-0.667288	0.728018	0.667288	0.53001	0.445273		0	0	1	0	0	2
	29	8.429	-0.00219575	0.128349		-0.128349	-0.130545	0.128349	0.130545	0.0164736	0.017042		0	0	0	1	0	3
	31	9.089	0.0364741	-5.0501		5.0501	5.08658	5.0501	5.08658	25.5035	25.8733		0	0	0	0	1	3
	33	9.018	0.0356728	-0.384386		0.384386	0.420058	0.384386	0.420058	0.147752	0.176449		0	0	0	0	1	3
	35	2.047	-0.0213988	0.063057		-0.063057	-0.0844558	0.063057	0.0844558	0.00397619	0.00713278		0	0	0	1	0	3
	37	2.427	-0.0115619	-0.30914		0.30914	0.297578	0.30914	0.297578	0.0955675	0.0885527		0	0	0	0	1	3
	38	1.735	-0.0113495	-0.484476		0.484476	0.473127	0.484476	0.473127	0.234717	0.223849		0	0	0	0	1	3
	40	4.042	0.00695144	0.0299524		-0.0299524	-0.023001	0.0299524	0.023001	0.000897146	0.000529044		0	0	1	0	0	2
	42	2.2	-0.0191197	-0.504948		0.504948	0.485829	0.504948	0.485829	0.254973	0.23603		0	0	0	1	0	3
	43	2.884	-0.015328	0.16408		-0.16408	-0.179408	0.16408	0.179408	0.0269222	0.0321871		0	0	0	1	0	3
	45	2.565	-0.0116282	-0.28379		0.28379	0.272162	0.28379	0.272162	0.080537	0.0740723		0	0	0	0	1	3
	46	1.75	-0.0113174	0.0445885		-0.0445885	-0.055906	0.0445885	0.055906	0.00198814	0.00312548		0	0	0	0	1	3
	48	5.119	0.0394025	0.916068		-0.916068	-0.876665	0.916068	0.876665	0.83918	0.768542		0	0	1	0	0	2
	49	2.395	-0.0137468	-0.824248		0.824248	0.810501	0.824248	0.810501	0.679385	0.656912		0	0	0	1	0	3
45	7	0.391	0.00891652	-0.00864308		0.00864308	0.0175596	0.00864308	0.0175596	7.47028e-05	0.000308339		0	0	0	1	2	3
	8	0.173	-0.0125341	-0.0242623		0.0242623	0.0117282	0.0242623	0.0117282	0.000588661	0.000137551		0	0	0	1	2	3
	9	-0.02	0.000447027	-0.0695323		0.0695323	0.0699793	0.0695323	0.0699793	0.00483474	0.0048971		0	0	0	1	2	3
	11	0.664	0.00288283	0.0112412		-0.0112412	-0.00835833	0.0112412	0.00835833	0.000126364	6.98617e-05		0	0	0	1	2	3
	12	0.517	-0.172699	0.0602855		-0.0602855	-0.232985	0.0602855	0.232985	0.00363434	0.054282		0	0	0	1	2	3
	13	-0.016	-0.0202042	-0.0609615		0.0609615	0.0407574	0.0609615	0.0407574	0.00371631	0.00166116		0	0	0	1	2	3
	15	0.665	-0.415461	0.0369803		-0.0369803	-0.452442	0.0369803	0.452442	0.00136754	0.204703		0	0	0	1	2	3
	16	0.448	0.00441675	-0.0049134		0.0049134	0.00933015	0.0049134	0.00933015	2.41415e-05	8.70517e-05		0	0	0	1	2	3
	17	-0.04	0.0147869	-0.0101255		0.0101255	0.0249124	0.0101255	0.0249124	0.000102526	0.000620627		0	0	0	1	2	3
	19	-0.002	-0.0200038	-0.0825514		0.0825514	0.0625476	0.0825514	0.0625476	0.00681474	0.00391221		0	0	0	1	2	3
	20	0.282	-0.00931436	-0.0262387		0.0262387	0.0169243	0.0262387	0.0169243	0.000688468	0.000286432		0	0	0	1	2	3
	21	0.6	0.00751439	-0.0273503		0.0273503	0.0348647	0.0273503	0.0348647	0.000748039	0.00121555		0	0	0	1	2	3
	23	-0.006	0.0222733	-0.0371023		0.0371023	0.0593756	0.0371023	0.0593756	0.00137658	0.00352546		0	0	0	1	2	3
	24	0.375	-0.334524	0.0510484		-0.0510484	-0.385573	0.0510484	0.385573	0.00260594	0.148666		0	0	0	1	2	3
	25	1.087	-0.319117	0.0949341		-0.0949341	-0.414051	0.0949341	0.414051	0.00901248	0.171438		0	0	0	1	2	3
	27	1.483	-0.116807	0.135771		-0.135771	-0.252578	0.135771	0.252578	0.0184339	0.0637958		0	0	0	1	2	3
	28	0.312	-0.0588768	0.0198197		-0.0198197	-0.0786964	0.0198197	0.0786964	0.000392819	0.00619313		0	0	0	1	2	3
	29	-0.044	0.00808359	-0.00474216		0.00474216	0.0128257	0.00474216	0.0128257	2.24881e-05	0.0001645		0	0	0	1	2	3
	35	0.117	-0.0189385	-0.0605019		0.0605019	0.0415634	0.0605019	0.0415634	0.00366048	0.00172752		0	0	0	1	2	3
	36	0.676	0.00622585	0.0112177		-0.0112177	-0.00499188	0.0112177	0.00499188	0.000125837	2.49189e-05		0	0	0	1	2	3
	37	0.721	-0.18168	0.0585046		-0.0585046	-0.240185	0.0585046	0.240185	0.00342279	0.0576888		0	0	0	1	2	3
	39	0.468	0.00446773	-0.00477307		0.00477307	0.0092408	0.00477307	0.0092408	2.27822e-05	8.53924e-05		0	0	0	1	2	3
	40	-0.007	0.0153406	-0.00974232		0.00974232	0.0250829	0.00974232	0.0250829	9.49128e-05	0.00062915		0	0	0	1	2	3
	41	0.807	-0.413127	0.0372638		-0.0372638	-0.450391	0.0372638	0.450391	0.00138859	0.202852		0	0	0	1	2	3
	43	0.024	0.00160754	-0.0696527		0.0696527	0.0712603	0.0696527	0.0712603	0.0048515	0.00507802		0	0	0	1	2	3
	44	0.528	0.0112228	-0.00861162		0.00861162	0.0198344	0.00861162	0.0198344	7.41601e-05	0.000393403		0	0	0	1	2	3
	45	0.269	-0.0121698	-0.0241698		0.0241698	0.012	0.0241698	0.012	0.000584178	0.000143999		0	0	0	1	2	3
	47	1.107	-0.319969	0.0956204		-0.0956204	-0.41559	0.0956204	0.41559	0.00914326	0.172715		0	0	0	1	2	3
	48	-0.059	0.0228157	-0.0369661		0.0369661	0.0597818	0.0369661	0.0597818	0.0013665	0.00357387		0	0	0	1	2	3
	49	0.37	-0.32822	0.0517437		-0.0517437	-0.379964	0.0517437	0.379964	0.00267742	0.144373		0	0	0	1	2	3
	51	1.391	-0.116282	0.135346		-0.135346	-0.251628	0.135346	0.251628	0.0183186	0.0633168		0	0	0	1	2	3
	52	0.092	-0.0650832	0.019537		-0.019537	-0.0846203	0.019537	0.0846203	0.000381696	0.00716059		0	0	0	1	2	3
	53	-0.127	0.00760052	-0.00482506		0.00482506	0.0124256	0.00482506	0.0124256	2.32812e-05	0.000154395		0	0	0	1	2	3
	55	0.616	0.00889706	-0.0273749		0.0273749	0.0362719	0.0273749	0.0362719	0.000749384	0.00131565		0	0	0	1	2	3
	56	-0.011	-0.0205501	-0.0824643		0.0824643	0.0619142	0.0824643	0.0619142	0.00680036	0.00383337		0	0	0	1	2	3
	57	0.35	-0.00877034	-0.0262339		0.0262339	0.0174636	0.0262339	0.0174636	0.000688217	0.000304976		0	0	0	1	2	3
46	32	8.146	0.122612	0.0215252		-0.0215252	0.101087	0.0215252	0.101087	0.000463333	0.0102186		0	0	1	0	0	2
	33	7.627	0.0457042	0.0085686		-0.0085686	0.0371356	0.0085686	0.0371356	7.34209e-05	0.00137905		0	0	0	1	0	3
	34	7.578	-0.0019751	0.00578689		-0.00578689	-0.007762	0.00578689	0.007762	3.34881e-05	6.02486e-05		0	0	0	0	1	3
	35	7.551	0.0453013	0.0170843		-0.0170843	0.0282171	0.0170843	0.0282171	0.000291872	0.000796204		0	0	0	1	0	3
	36	8.772	0.0995491	-0.0227561		0.0227561	0.122305	0.0227561	0.122305	0.000517841	0.0149586		0	0	1	0	0	2
	37	4.452	-0.0739385	-0.0168667		0.0168667	-0.0570717	0.0168667	0.0570717	0.000284487	0.00325718		0	0	0	0	1	3
	38	3.063	-0.00204202	-0.0347308		0.0347308	0.0326888	0.0347308	0.0326888	0.00120623	0.00106856		0	0	0	0	1	3
	39	1.99	-0.0113436	-0.000246371		0.000246371	-0.0110972	0.000246371	0.0110972	6.06988e-08	0.000123148		0	0	0	0	0	3
	40	0.746	-0.0110712	0.00474895		-0.00474895	-0.0158202	0.00474895	0.0158202	2.25525e-05	0.000250279		0	0	0	0	0	3
	41	1.052	-0.0109876	-0.00714964		0.00714964	-0.00383794	0.00714964	0.00383794	5.11174e-05	1.47298e-05		0	0	0	0	0	3
	42	4.13	-0.0606907	-0.0257218		0.0257218	-0.0349688	0.0257218	0.0349688	0.000661613	0.00122282		0	0	0	0	1	3
	43	3.268	-0.00509641	-0.0367534		0.0367534	0.031657	0.0367534	0.031657	0.00135081	0.00100217		0	0	0	0	1	3
	44	1.967	-0.0113331	0.00113659		-0.00113659	-0.0124697	0.00113659	0.0124697	1.29184e-06	0.000155494		0	0	0	0	0	3
	45	0.729	-0.0110308	0.000649258		-0.000649258	-0.0116801	0.000649258	0.0116801	4.21536e-07	0.000136424		0	0	0	0	0	3
	46	1.081	-0.0111436	-0.00281916		0.00281916	-0.00832443	0.00281916	0.00832443	7.94765e-06	6.92961e-05		0	0	0	0	0	3
	47	4.211	-0.0619672	-0.0183683		0.0183683	-0.0435989	0.0183683	0.0435989	0.000337393	0.00190087		0	0	0	0	1	3
	48	2.871	-0.00233118	-0.035606		0.035606	0.0332748	0.035606	0.0332748	0.00126779	0.00110721		0	0	0	0	1	3
	49	0.985	-0.0109065	-0.00715255		0.00715255	-0.00375394	0.00715255	0.00375394	5.1159e-05	1.40921e-05		0	0	0	0	0	3
	50	1.795	-0.0112975	-0.000608941		0.000608941	-0.0106885	0.000608941	0.0106885	3.70809e-07	0.000114244		0	0	0	0	0	3
	51	0.675	-0.010948	0.00202132		-0.00202132	-0.0129693	0.00202132	0.0129693	4.08572e-06	0.000168204		0	0	0	0	0	3
	52	4.247	-0.0624582	-0.0226461		0.0226461	-0.0398121	0.0226461	0.0398121	0.000512847	0.001585		0	0	0	0	1	3
	53	3.055	-0.00173436	-0.0264665		0.0264665	0.0247321	0.0264665	0.0247321	0.000700475	0.000611678		0	0	0	0	1	3
	54	1.751	-0.0113164	-0.00104255		0.00104255	-0.0102739	0.00104255	0.0102739	1.0869e-06	0.000105553		0	0	0	0	0	3
	55	0.636	-0.0109436	0.00410574		-0.00410574	-0.0150494	0.00410574	0.0150494	1.68571e-05	0.000226483		0	0	0	0	0	3
	56	0.894	-0.0110725	-0.00494417		0.00494417	-0.00612836	0.00494417	0.00612836	2.44449e-05	3.75568e-05		0	0	0	0	0	3
	57	4.279	-0.0606448	-0.0239696		0.0239696	-0.0366752	0.0239696	0.0366752	0.000574542	0.00134507		0	0	0	0	1	3
	58	2.932	-0.00198742	-0.0336842		0.0336842	0.0316967	0.0336842	0.0316967	0.00113462	0.00100468		0	0	0	0	1	3
	59	1.479	-0.0113521	-0.000954852		0.000954852	-0.0103972	0.000954852	0.0103972	9.11743e-07	0.000108102		0	0	0	0	0	3
	60	0.461	-0.0110169	0.00484692		-0.00484692	-0.0158638	0.00484692	0.0158638	2.34926e-05	0.00025166		0	0	0	0	0	3
	61	0.762	-0.0109967	-0.0053242		0.0053242	-0.00567247	0.0053242	0.00567247	2.83471e-05	3.2177e-05		0	0	0	0	0	3
	62	4.266	-0.0546754	-0.0132306		0.0132306	-0.0414448	0.0132306	0.0414448	0.000175048	0.00171767		0	0	0	0	1	3
	63	2.981	-0.00395339	-0.0339797		0.0339797	0.0300263	0.0339797	0.0300263	0.00115462	0.00090158		0	0	0	0	1	3
	64	1.83	-0.0112973	0.000582246		-0.000582246	-0.0118795	0.000582246	0.0118795	3.39011e-07	0.000141123		0	0	0	0	0	3
	65	0.69	-0.0108662	0.00157614		-0.00157614	-0.0124424	0.00157614	0.0124424	2.48423e-06	0.000154813		0	0	0	0	0	3
	66	1.002	-0.0109699	-0.00582871		0.00582871	-0.0051412	0.00582871	0.0051412	3.39739e-05	2.64319e-05		0	0	0	0	0	3
49	19	6.564	0.0327942	0.0452014		-0.0452014	-0.0124072	0.0452014	0.0124072	0.00204317	0.000153939		0	0	1	0	0	2
	20	6.434	-0.000711195	0.0440587		-0.0440587	-0.0447699	0.0440587	0.0447699	0.00194117	0.00200434		0	0	0	1	0	3
	21	6.721	0.0337993	0.0529338		-0.0529338	-0.0191345	0.0529338	0.0191345	0.00280198	0.000366128		0	0	1	0	0	2
	22	6.419	0.0682698	0.0287792		-0.0287792	0.0394907	0.0287792	0.0394907	0.000828241	0.00155951		0	1	0	0	0	1
	23	0.3	0.00517671	0.0521415		-0.0521415	-0.0469648	0.0521415	0.0469648	0.00271874	0.00220569		0	0	0	1	0	3
	24	0.253	-0.00792067	-0.0039575		0.0039575	-0.00396317	0.0039575	0.00396317	1.56618e-05	1.57067e-05		0	0	0	1	0	3
	25	-0.227	-0.000789046	0.0182595		-0.0182595	-0.0190485	0.0182595	0.0190485	0.000333409	0.000362846		0	0	0	1	0	3
	26	0.464	-0.000654459	-0.000591326		0.000591326	-6.3133e-05	0.000591326	6.3133e-05	3.49666e-07	3.98577e-09		0	0	0	1	0	3
	27	0.477	-0.0113907	0.00415061		-0.00415061	-0.0155414	0.00415061	0.0155414	1.72276e-05	0.000241534		0	0	0	1	0	3
	28	0.367	0.0011164	0.0106651		-0.0106651	-0.00954867	0.0106651	0.00954867	0.000113744	9.11771e-05		0	0	0	1	0	3
	29	6.431	0.0682579	0.0283334		-0.0283334	0.0399245	0.0283334	0.0399245	0.00080278	0.00159397		0	1	0	0	0	1
	30	6.746	0.03363	0.0532038		-0.0532038	-0.0195738	0.0532038	0.0195738	0.00283064	0.000383135		0	0	1	0	0	2
	31	6.416	-0.000777639	0.0439574		-0.0439574	-0.044735	0.0439574	0.044735	0.00193225	0.00200122		0	0	0	1	0	3
	32	6.583	0.0329143	0.0457152		-0.0457152	-0.012801	0.0457152	0.012801	0.00208988	0.000163864		0	0	1	0	0	2
	33	0.466	-0.0114072	0.00418511		-0.00418511	-0.0155923	0.00418511	0.0155923	1.75152e-05	0.00024312		0	0	0	1	0	3
	34	0.473	-0.000570595	-0.000554009		0.000554009	-1.65858e-05	0.000554009	1.65858e-05	3.06927e-07	2.75088e-10		0	0	0	1	0	3
	35	0.394	0.001037	0.0103102		-0.0103102	-0.00927325	0.0103102	0.00927325	0.000106301	8.59931e-05		0	0	0	1	0	3
	36	0.248	-0.00784454	-0.00400856		0.00400856	-0.00383597	0.00400856	0.00383597	1.60686e-05	1.47147e-05		0	0	0	1	0	3
	37	0.296	0.00495394	0.0518207		-0.0518207	-0.0468667	0.0518207	0.0468667	0.00268538	0.00219649		0	0	0	1	0	3
	38	-0.225	-0.000960939	0.0180469		-0.0180469	-0.0190079	0.0180469	0.0190079	0.000325692	0.0003613		0	0	0	1	0	3
50	18	1.929	-0.0105892	0.00349871		-0.00349871	-0.0140879	0.00349871	0.0140879	1.2241e-05	0.000198468		0	0	0	1	0	3
	19	1.777	-0.00179972	0.0373476		-0.0373476	-0.0391473	0.0373476	0.0391473	0.00139484	0.00153251		0	0	0	1	0	3
	20	2.013	-0.0110675	0.00602265		-0.00602265	-0.0170902	0.00602265	0.0170902	3.62723e-05	0.000292075		0	0	0	1	0	3
	21	2.061	-0.01127	0.00666674		-0.00666674	-0.0179367	0.00666674	0.0179367	4.44454e-05	0.000321727		0	0	0	0	1	3
	22	1.997	-0.0113086	0.00209097		-0.00209097	-0.0133996	0.00209097	0.0133996	4.37217e-06	0.000179549		0	0	0	0	1	3
	23	1.761	-0.0104061	0.0163096		-0.0163096	-0.0267157	0.0163096	0.0267157	0.000266003	0.000713731		0	0	0	0	1	3
	24	2.142	-0.0112641	0.00511192		-0.00511192	-0.016376	0.00511192	0.016376	2.61317e-05	0.000268174		0	0	0	0	1	3
	25	1.874	-0.0104195	0.0269445		-0.0269445	-0.037364	0.0269445	0.037364	0.000726004	0.00139607		0	0	0	0	1	3
	26	2.186	-0.011311	0.00754274		-0.00754274	-0.0188537	0.00754274	0.0188537	5.6893e-05	0.000355463		0	0	0	0	1	3
	27	2.041	-0.00197619	0.0173428		-0.0173428	-0.019319	0.0173428	0.019319	0.000300773	0.000373223		0	0	0	1	0	3
	28	1.894	-0.0103986	0.0160972		-0.0160972	-0.0264959	0.0160972	0.0264959	0.000259121	0.00070203		0	0	0	1	0	3
	29	2.065	-0.0106979	-0.00717118		0.00717118	-0.00352675	0.00717118	0.00352675	5.14258e-05	1.2438e-05		0	0	0	1	0	3
	30	0.207	-0.00850384	-0.00443065		0.00443065	-0.00407319	0.00443065	0.00407319	1.96307e-05	1.65908e-05		0	0	0	1	0	3
	31	0.622	0.00483225	-0.00533044		0.00533044	0.0101627	0.00533044	0.0101627	2.84136e-05	0.00010328		0	0	0	1	0	3
	32	0.007	-0.00894362	-0.00141095		0.00141095	-0.00753267	0.00141095	0.00753267	1.99079e-06	5.67411e-05		0	0	0	1	0	3
	33	0.06	-0.00376275	-0.00201241		0.00201241	-0.00175034	0.00201241	0.00175034	4.04979e-06	3.0637e-06		0	0	0	1	0	3
	34	0.129	-0.00882664	0.00476068		-0.00476068	-0.0135873	0.00476068	0.0135873	2.26641e-05	0.000184615		0	0	0	1	0	3
	35	0.701	0.00328067	-0.00325821		0.00325821	0.00653888	0.00325821	0.00653888	1.0616e-05	4.2757e-05		0	0	0	1	0	3
	36	0.927	-0.0106806	-0.00217146		0.00217146	-0.00850911	0.00217146	0.00850911	4.71522e-06	7.24049e-05		0	0	0	0	1	3
	37	0.972	-0.0117024	-0.00504562		0.00504562	-0.00665679	0.00504562	0.00665679	2.54583e-05	4.43129e-05		0	0	0	0	1	3
	38	0.504	-0.00520997	-0.00577239		0.00577239	0.000562421	0.00577239	0.000562421	3.33205e-05	3.16318e-07		0	0	0	0	1	3
	39	1.175	-0.00948152	-0.0035185		0.0035185	-0.00596302	0.0035185	0.00596302	1.23798e-05	3.55576e-05		0	0	0	0	1	3
	40	0.579	-0.00491834	-0.00716868		0.00716868	0.00225034	0.00716868	0.00225034	5.139e-05	5.06402e-06		0	0	0	0	1	3
	41	0.983	-0.0115857	-0.00404466		0.00404466	-0.00754103	0.00404466	0.00754103	1.63593e-05	5.68671e-05		0	0	0	0	1	3
	42	1.118	-0.0104459	-0.00368895		0.00368895	-0.00675694	0.00368895	0.00675694	1.36083e-05	4.56562e-05		0	0	0	0	1	3
	43	1.043	-0.010226	-0.00407195		0.00407195	-0.00615409	0.00407195	0.00615409	1.65808e-05	3.78729e-05		0	0	0	0	1	3
	44	0.741	-0.00437608	-0.00363413		0.00363413	-0.000741941	0.00363413	0.000741941	1.32069e-05	5.50477e-07		0	0	0	0	1	3
	48	0.202	-0.00846013	-0.00443747		0.00443747	-0.00402267	0.00443747	0.00402267	1.96911e-05	1.61818e-05		0	0	0	1	0	3
	49	0.628	0.00481524	-0.00530558		0.00530558	0.0101208	0.00530558	0.0101208	2.81492e-05	0.000102431		0	0	0	1	0	3
	50	0.014	-0.00891438	-0.00131903		0.00131903	-0.00759535	0.00131903	0.00759535	1.73983e-06	5.76894e-05		0	0	0	1	0	3
	52	0.058	-0.00379194	-0.00206607		0.00206607	-0.00172587	0.00206607	0.00172587	4.26866e-06	2.97862e-06		0	0	0	1	0	3
	53	0.126	-0.00886182	0.00469577		-0.00469577	-0.0135576	0.00469577	0.0135576	2.20502e-05	0.000183808		0	0	0	1	0	3
	54	0.702	0.00323886	-0.00328737		0.00328737	0.00652623	0.00328737	0.00652623	1.08068e-05	4.25917e-05		0	0	0	1	0	3
	57	0.929	-0.0106777	-0.00220391		0.00220391	-0.0084738	0.00220391	0.0084738	4.85724e-06	7.18052e-05		0	0	0	0	1	3
	58	0.977	-0.011702	-0.00507304		0.00507304	-0.00662899	0.00507304	0.00662899	2.57357e-05	4.39435e-05		0	0	0	0	1	3
	59	0.504	-0.00518935	-0.00579118		0.00579118	0.000601827	0.00579118	0.000601827	3.35377e-05	3.62196e-07		0	0	0	0	1	3
	61	1.179	-0.00948112	-0.003506		0.003506	-0.00597511	0.003506	0.00597511	1.22921e-05	3.5702e-05		0	0	0	0	1	3
	62	0.578	-0.004913	-0.00715136		0.00715136	0.00223835	0.00715136	0.00223835	5.11419e-05	5.01023e-06		0	0	0	0	1	3
	63	0.984	-0.0115838	-0.00401397		0.00401397	-0.0075698	0.00401397	0.0075698	1.6112e-05	5.73018e-05		0	0	0	0	1	3
	65	1.113	-0.0104543	-0.0037012		0.0037012	-0.00675311	0.0037012	0.00675311	1.36989e-05	4.56046e-05		0	0	0	0	1	3
	66	1.036	-0.0102337	-0.00409248		0.00409248	-0.00614125	0.00409248	0.00614125	1.67484e-05	3.77149e-05		0	0	0	0	1	3
	67	0.739	-0.00438317	-0.00365538		0.00365538	-0.000727794	0.00365538	0.000727794	1.33618e-05	5.29684e-07		0	0	0	0	1	3
	71	1.941	-0.0105575	0.00364905		-0.00364905	-0.0142066	0.00364905	0.0142066	1.33155e-05	0.000201827		0	0	0	1	0	3
	72	1.778	-0.00179069	0.0383393		-0.0383393	-0.0401299	0.0383393	0.0401299	0.0014699	0.00161041		0	0	0	1	0	3
	73	2.01	-0.0110657	0.00639018		-0.00639018	-0.0174559	0.00639018	0.0174559	4.08344e-05	0.000304708		0	0	0	1	0	3
	77	2.139	-0.011264	0.00497894		-0.00497894	-0.0162429	0.00497894	0.0162429	2.47898e-05	0.000263831		0	0	0	0	1	3
	78	1.875	-0.0104183	0.0264752		-0.0264752	-0.0368935	0.0264752	0.0368935	0.000700939	0.00136113		0	0	0	0	1	3
	79	2.181	-0.0113113	0.0073828		-0.0073828	-0.0186941	0.0073828	0.0186941	5.45057e-05	0.000349469		0	0	0	0	1	3
	81	2.043	-0.0019441	0.0166469		-0.0166469	-0.018591	0.0166469	0.018591	0.00027712	0.000345626		0	0	0	1	0	3
	82	1.887	-0.0104112	0.0154602		-0.0154602	-0.0258713	0.0154602	0.0258713	0.000239016	0.000669325		0	0	0	1	0	3
	83	2.062	-0.0106978	-0.00724659		0.00724659	-0.00345125	0.00724659	0.00345125	5.25131e-05	1.19111e-05		0	0	0	1	0	3
	85	2.063	-0.0112702	0.00692797		-0.00692797	-0.0181982	0.00692797	0.0181982	4.79968e-05	0.000331174		0	0	0	0	1	3
	86	1.993	-0.0113082	0.002198		-0.002198	-0.0135062	0.002198	0.0135062	4.83122e-06	0.000182418		0	0	0	0	1	3
	87	1.759	-0.0104057	0.0169572		-0.0169572	-0.0273629	0.0169572	0.0273629	0.000287547	0.000748727		0	0	0	0	1	3
SnMe4	3	-0.106	0.172797	0.15003		-0.15003	0.0227674	0.15003	0.0227674	0.0225089	0.000518353		0	1	0	0	0	1
	4	-0.107	0.172799	0.14955		-0.14955	0.0232499	0.14955	0.0232499	0.0223651	0.000540559		0	1	0	0	0	1
	5	-0.106	0.17279	0.15037		-0.15037	0.0224204	0.15037	0.0224204	0.0226112	0.000502674		0	1	0	0	0	1
	7	-0.111	0.172792	0.149854		-0.149854	0.0229378	0.149854	0.0229378	0.0224563	0.000526141		0	1	0	0	0	1
	8	-0.111	0.172794	0.149925		-0.149925	0.0228695	0.149925	0.0228695	0.0224774	0.000523016		0	1	0	0	0	1
	9	-0.113	0.172793	0.149674		-0.149674	0.0231195	0.149674	0.0231195	0.0224023	0.000534511		0	1	0	0	0	1
	11	-0.108	0.172794	0.14988		-0.14988	0.0229131	0.14988	0.0229131	0.0224642	0.000525012		0	1	0	0	0	1
	12	-0.107	0.172801	0.14975		-0.14975	0.0230503	0.14975	0.0230503	0.0224252	0.000531315		0	1	0	0	0	1
	13	-0.11	0.172792	0.150105		-0.150105	0.0226867	0.150105	0.0226867	0.0225316	0.000514687		0	1	0	0	0	1
	15	-0.109	0.172791	0.150308		-0.150308	0.0224835	0.150308	0.0224835	0.0225924	0.000505506		0	1	0	0	0	1
	16	-0.11	0.172798	0.149797		-0.149797	0.0230008	0.149797	0.0230008	0.0224391	0.000529035		0	1	0	0	0	1
	17	-0.108	0.172797	0.149851		-0.149851	0.0229458	0.149851	0.0229458	0.0224553	0.000526508		0	1	0	0	0	1
						All nuclei		Category 1		Category 2		Category 3
						SR	SR+ML	SR	SR+ML	SR	SR+ML	SR	SR+ML
					MD	-0.00664503	0.0153881	-0.161485	0.0103175	-0.0577103	0.0494194	0.00924002	0.0105877
					MAD	0.0531715	0.0617807	0.161485	0.0694258	0.115352	0.169885	0.0381165	0.0452621
					RMSD	0.22808	0.244886	0.177984	0.112976	0.272465	0.360919	0.223153	0.228071

## Sheet: PbS58 C
Pb Benchmark set for 13C NMR (Figure S9)
						Deviation		Absolute deviation		Squared deviation			# HAs in … bonding sphere
Compound	Atom (C)	δ(DFT,SR)	ΔSOδ (ML)	ΔSOδ (true)		SR	SR+ML	SR	SR+ML	SR	SR+ML		1	2	3	4	Category
1	4	174.339	0.415699	-1.23022		1.23022	1.64592	1.23022	1.64592	1.51343	2.70904		0	1	0	0	2
	5	155.706	3.57668	3.98561		-3.98561	-0.408938	3.98561	0.408938	15.8851	0.167231		0	0	1	0	3
	6	134.842	0.171512	0.192605		-0.192605	-0.0210922	0.192605	0.0210922	0.0370965	0.000444882		0	0	0	1	3
	8	124.488	0.171512	0.9764		-0.9764	-0.804887	0.9764	0.804887	0.953356	0.647844		0	0	0	0	3
	10	136.746	0.154652	0.539104		-0.539104	-0.384451	0.539104	0.384451	0.290633	0.147803		0	0	0	1	3
	12	146.627	4.0843	1.21159		-1.21159	2.87271	1.21159	2.87271	1.46795	8.25247		0	0	1	0	3
	13	134.298	0.446838	0.218112		-0.218112	0.228726	0.218112	0.228726	0.047573	0.0523156		0	0	0	1	3
	14	138.904	0.165664	0.391665		-0.391665	-0.226001	0.391665	0.226001	0.153401	0.0510764		0	0	0	0	3
	15	126.546	2.59198	0.270322		-0.270322	2.32166	0.270322	2.32166	0.073074	5.39009		0	0	0	0	3
	17	150.491	0.171512	0.197786		-0.197786	-0.0262736	0.197786	0.0262736	0.0391193	0.000690304		0	0	0	0	3
	18	127.106	2.06932	0.209749		-0.209749	1.85957	0.209749	1.85957	0.0439945	3.45801		0	0	0	0	3
	20	150.33	0.171512	0.425814		-0.425814	-0.254303	0.425814	0.254303	0.181318	0.06467		0	0	0	0	3
	21	34.124	0.171512	0.138154		-0.138154	0.033358	0.138154	0.033358	0.0190866	0.00111276		0	0	0	0	3
	23	27.737	0.171512	-0.0126617		0.0126617	0.184174	0.0126617	0.184174	0.000160319	0.0339201		0	0	0	0	3
	27	24.259	0.171512	0.0598812		-0.0598812	0.111631	0.0598812	0.111631	0.00358576	0.0124615		0	0	0	0	3
	31	42.248	0.171512	0.0270783		-0.0270783	0.144434	0.0270783	0.144434	0.000733236	0.0208612		0	0	0	0	3
	33	27.9	0.171512	0.0831402		-0.0831402	0.0883721	0.0831402	0.0883721	0.0069123	0.00780963		0	0	0	0	3
	37	24.576	0.171512	0.0968658		-0.0968658	0.0746466	0.0968658	0.0746466	0.00938298	0.00557211		0	0	0	0	3
	41	35.908	0.171514	0.181039		-0.181039	-0.00952412	0.181039	0.00952412	0.032775	9.07088e-05		0	0	0	0	3
	43	24.934	0.171512	0.302313		-0.302313	-0.130801	0.302313	0.130801	0.0913931	0.0171088		0	0	0	0	3
	47	24.688	0.171512	0.092776		-0.092776	0.0787363	0.092776	0.0787363	0.00860739	0.00619941		0	0	0	0	3
	51	128.982	0.841048	-0.88379		0.88379	1.72484	0.88379	1.72484	0.781085	2.97507		0	0	0	1	3
	52	150.966	0.171512	-0.0419058		0.0419058	0.213418	0.0419058	0.213418	0.0017561	0.0455473		0	0	0	0	3
	53	128.158	2.16181	0.229892		-0.229892	1.93192	0.229892	1.93192	0.0528501	3.7323		0	0	0	0	3
	55	153.703	0.171512	0.0507635		-0.0507635	0.120749	0.0507635	0.120749	0.00257693	0.0145803		0	0	0	0	3
	56	120.703	2.37882	-0.0273107		0.0273107	2.40613	0.0273107	2.40613	0.000745874	5.78946		0	0	0	0	3
	58	154.034	2.00889	1.74291		-1.74291	0.265984	1.74291	0.265984	3.03773	0.0707473		0	0	0	0	3
	59	35.538	0.171676	0.0456968		-0.0456968	0.125979	0.0456968	0.125979	0.0020882	0.0158707		0	0	0	0	3
	61	22.858	0.171512	0.450353		-0.450353	-0.278841	0.450353	0.278841	0.202818	0.0777522		0	0	0	0	3
	65	22.73	0.171512	0.161898		-0.161898	0.00961457	0.161898	0.00961457	0.0262109	9.244e-05		0	0	0	0	3
	69	38.728	0.171512	0.0633371		-0.0633371	0.108175	0.0633371	0.108175	0.00401159	0.0117019		0	0	0	0	3
	71	28.612	0.171512	-0.00759199		0.00759199	0.179104	0.00759199	0.179104	5.76384e-05	0.0320784		0	0	0	0	3
	75	28.239	0.171512	0.0934009		-0.0934009	0.0781114	0.0934009	0.0781114	0.00872373	0.00610139		0	0	0	0	3
	79	29.535	0.171512	0.343642		-0.343642	-0.17213	0.343642	0.17213	0.11809	0.0296286		0	0	0	0	3
	81	28.963	0.171512	-0.274518		0.274518	0.44603	0.274518	0.44603	0.0753601	0.198943		0	0	0	0	3
	85	25.027	0.171512	-0.250311		0.250311	0.421823	0.250311	0.421823	0.0626556	0.177935		0	0	0	0	3
	89	155.844	0.27035	-0.906239		0.906239	1.17659	0.906239	1.17659	0.821268	1.38436		0	1	0	0	2
	90	139.408	5.34007	1.66154		-1.66154	3.67853	1.66154	3.67853	2.76072	13.5316		0	0	1	0	3
	91	133.791	0.448662	1.77181		-1.77181	-1.32315	1.77181	1.32315	3.1393	1.75071		0	0	0	1	3
	93	125.835	0.171512	0.542718		-0.542718	-0.371205	0.542718	0.371205	0.294542	0.137793		0	0	0	0	3
	95	137.899	0.171512	0.667768		-0.667768	-0.496256	0.667768	0.496256	0.445914	0.24627		0	0	0	1	3
	97	146.816	2.96375	6.38054		-6.38054	-3.4168	6.38054	3.4168	40.7113	11.6745		0	0	1	0	3
	98	155.855	0.742031	-1.1234		1.1234	1.86543	1.1234	1.86543	1.26203	3.47984		0	0	0	1	3
	99	155.168	0.154389	-1.1093		1.1093	1.26369	1.1093	1.26369	1.23054	1.5969		0	0	0	0	3
	100	135.106	2.8101	-0.425904		0.425904	3.236	0.425904	3.236	0.181394	10.4717		0	0	0	0	3
	102	154.862	0.171512	-0.0240044		0.0240044	0.195517	0.0240044	0.195517	0.000576209	0.0382268		0	0	0	0	3
	103	126.218	2.23286	-0.16194		0.16194	2.3948	0.16194	2.3948	0.0262244	5.73507		0	0	0	0	3
	105	159.207	0.130362	0.173471		-0.173471	-0.0431083	0.173471	0.0431083	0.0300921	0.00185833		0	0	0	0	3
	106	35.829	0.173655	-0.20999		0.20999	0.383645	0.20999	0.383645	0.0440958	0.147183		0	0	0	0	3
	108	32.509	0.171512	0.0944396		-0.0944396	0.0770728	0.0944396	0.0770728	0.00891883	0.00594021		0	0	0	0	3
	112	30.84	0.171512	0.35423		-0.35423	-0.182718	0.35423	0.182718	0.125479	0.0333858		0	0	0	0	3
	116	39.61	0.171512	0.0695413		-0.0695413	0.101971	0.0695413	0.101971	0.00483599	0.0103981		0	0	0	0	3
	118	26.625	0.171512	0.0303955		-0.0303955	0.141117	0.0303955	0.141117	0.000923887	0.019914		0	0	0	0	3
	122	28.849	0.171512	-0.0336175		0.0336175	0.20513	0.0336175	0.20513	0.00113013	0.0420782		0	0	0	0	3
	126	36.821	0.171512	0.133865		-0.133865	0.037647	0.133865	0.037647	0.0179199	0.0014173		0	0	0	0	3
	128	27.864	0.171512	-0.0352288		0.0352288	0.206741	0.0352288	0.206741	0.00124107	0.0427419		0	0	0	0	3
	132	26.057	0.171512	-0.11529		0.11529	0.286802	0.11529	0.286802	0.0132918	0.0822557		0	0	0	0	3
	136	147.947	1.31616	0.340797		-0.340797	0.975364	0.340797	0.975364	0.116142	0.951334		0	0	0	1	3
	137	154.359	0.171506	0.28266		-0.28266	-0.111155	0.28266	0.111155	0.0798969	0.0123554		0	0	0	0	3
	138	127.668	2.58134	0.185897		-0.185897	2.39544	0.185897	2.39544	0.0345578	5.73814		0	0	0	0	3
	140	151.174	0.171512	0.249661		-0.249661	-0.0781483	0.249661	0.0781483	0.0623304	0.00610716		0	0	0	0	3
	141	126.141	2.18807	0.200549		-0.200549	1.98752	0.200549	1.98752	0.0402198	3.95023		0	0	0	0	3
	143	160.607	0.171511	0.435234		-0.435234	-0.263723	0.435234	0.263723	0.189429	0.0695499		0	0	0	0	3
	144	33.059	0.171512	0.0243387		-0.0243387	0.147174	0.0243387	0.147174	0.00059237	0.0216601		0	0	0	0	3
	146	26.905	0.171512	0.145449		-0.145449	0.0260633	0.145449	0.0260633	0.0211554	0.000679293		0	0	0	0	3
	150	25.972	0.171512	0.134547		-0.134547	0.036965	0.134547	0.036965	0.018103	0.00136641		0	0	0	0	3
	154	41.785	0.171512	0.0220791		-0.0220791	0.149433	0.0220791	0.149433	0.000487488	0.0223303		0	0	0	0	3
	156	28.089	0.171512	0.148917		-0.148917	0.0225954	0.148917	0.0225954	0.0221762	0.000510553		0	0	0	0	3
	160	26.423	0.171512	0.143971		-0.143971	0.0275412	0.143971	0.0275412	0.0207277	0.000758519		0	0	0	0	3
	164	35.58	0.171512	0.0485127		-0.0485127	0.123	0.0485127	0.123	0.00235348	0.0151289		0	0	0	0	3
	166	26.83	0.171512	0.286157		-0.286157	-0.114645	0.286157	0.114645	0.0818858	0.0131434		0	0	0	0	3
	170	25.563	0.171512	0.238021		-0.238021	-0.0665083	0.238021	0.0665083	0.0566538	0.00442336		0	0	0	0	3
3	2	179.72	77.7762	78.5128		-78.5128	-0.736556	78.5128	0.736556	6164.25	0.542514		1	0	0	0	1
	4	157.414	4.20926	4.6938		-4.6938	-0.484538	4.6938	0.484538	22.0318	0.234777		0	1	0	0	2
	6	142.597	0.748335	4.49365		-4.49365	-3.74531	4.49365	3.74531	20.1929	14.0274		0	0	1	0	3
	7	129.875	0.171512	0.0798766		-0.0798766	0.0916357	0.0798766	0.0916357	0.00638027	0.00839711		0	0	0	1	3
	9	133.093	0.171512	0.0345544		-0.0345544	0.136958	0.0345544	0.136958	0.00119401	0.0187575		0	0	0	0	3
	11	133.121	0.171512	0.608984		-0.608984	-0.437471	0.608984	0.437471	0.370861	0.191381		0	0	0	0	3
	13	133.926	0.171512	0.664499		-0.664499	-0.492987	0.664499	0.492987	0.441559	0.243036		0	0	0	0	3
	15	135.85	0.171512	0.528293		-0.528293	-0.356781	0.528293	0.356781	0.279093	0.127292		0	0	0	1	3
	17	175.335	87.1836	65.6134		-65.6134	21.5702	65.6134	21.5702	4305.12	465.274		1	0	0	0	1
	18	151.175	7.17106	4.8972		-4.8972	2.27386	4.8972	2.27386	23.9826	5.17043		0	1	0	0	2
	19	132.587	1.79121	8.57423		-8.57423	-6.78302	8.57423	6.78302	73.5173	46.0093		0	0	1	0	3
	21	132.126	0.171512	-0.487576		0.487576	0.659088	0.487576	0.659088	0.23773	0.434397		0	0	0	1	3
	23	131.484	1.27616	8.42489		-8.42489	-7.14873	8.42489	7.14873	70.9787	51.1043		0	0	1	0	3
	25	156.786	0.171512	0.112773		-0.112773	0.058739	0.112773	0.058739	0.0127178	0.00345027		0	0	0	0	3
	26	154.085	6.41553	4.93773		-4.93773	1.4778	4.93773	1.4778	24.3811	2.18389		0	1	0	0	2
	27	135.541	3.81991	-1.55184		1.55184	5.37175	1.55184	5.37175	2.40821	28.8557		0	0	1	0	3
	28	149.734	1.30034	0.345183		-0.345183	0.955159	0.345183	0.955159	0.119151	0.912329		0	0	0	1	3
	29	26.515	0.171512	0.134558		-0.134558	0.036954	0.134558	0.036954	0.018106	0.0013656		0	0	0	0	3
	33	122.65	2.31315	0.248282		-0.248282	2.06487	0.248282	2.06487	0.0616442	4.26367		0	0	0	0	3
	35	154.853	0.140276	0.208675		-0.208675	-0.0683995	0.208675	0.0683995	0.0435452	0.00467849		0	0	0	1	3
	36	127.863	2.67686	0.17069		-0.17069	2.50617	0.17069	2.50617	0.0291349	6.28087		0	0	0	0	3
	38	33.958	0.171512	0.113184		-0.113184	0.0583281	0.113184	0.0583281	0.0128107	0.00340216		0	0	0	0	3
	40	24.379	0.171512	-0.0190761		0.0190761	0.190588	0.0190761	0.190588	0.000363897	0.0363239		0	0	0	0	3
	44	34.944	0.171512	0.134515		-0.134515	0.036997	0.134515	0.036997	0.0180944	0.00136878		0	0	0	0	3
	46	21.873	0.171512	0.539559		-0.539559	-0.368047	0.539559	0.368047	0.291124	0.135458		0	0	0	0	3
	50	40.405	0.171512	0.0542849		-0.0542849	0.117227	0.0542849	0.117227	0.00294685	0.0137423		0	0	0	0	3
	52	27.964	0.171512	0.16753		-0.16753	0.00398214	0.16753	0.00398214	0.0280664	1.58575e-05		0	0	0	0	3
	56	25.904	0.171512	-0.00952366		0.00952366	0.181036	0.00952366	0.181036	9.07e-05	0.032774		0	0	0	0	3
	60	141.866	4.20561	-1.31466		1.31466	5.52027	1.31466	5.52027	1.72834	30.4734		0	0	1	0	3
	61	23.146	0.171512	0.000508268		-0.000508268	0.171004	0.000508268	0.171004	2.58337e-07	0.0292424		0	0	0	0	3
	65	153.721	0.146185	0.260395		-0.260395	-0.11421	0.260395	0.11421	0.0678055	0.0130439		0	0	0	1	3
	66	125.866	2.82115	0.18703		-0.18703	2.63411	0.18703	2.63411	0.0349804	6.93856		0	0	0	0	3
	68	155.083	0.171512	0.125652		-0.125652	0.0458606	0.125652	0.0458606	0.0157884	0.0021032		0	0	0	0	3
	69	123.597	2.31621	0.259256		-0.259256	2.05696	0.259256	2.05696	0.0672137	4.23107		0	0	0	0	3
	71	156.392	1.0308	0.291967		-0.291967	0.738836	0.291967	0.738836	0.0852446	0.545879		0	0	0	1	3
	72	34.832	0.171512	0.108119		-0.108119	0.0633932	0.108119	0.0633932	0.0116898	0.00401869		0	0	0	0	3
	74	36.561	0.171512	0.128009		-0.128009	0.0435036	0.128009	0.0435036	0.0163862	0.00189257		0	0	0	0	3
	76	24.201	0.171512	0.504774		-0.504774	-0.333262	0.504774	0.333262	0.254797	0.111063		0	0	0	0	3
	80	27.78	0.171512	0.166034		-0.166034	0.00547793	0.166034	0.00547793	0.0275674	3.00078e-05		0	0	0	0	3
	84	27.536	0.171512	-0.0176815		0.0176815	0.189194	0.0176815	0.189194	0.000312635	0.0357943		0	0	0	0	3
	88	23.8	0.171512	-0.0193288		0.0193288	0.190841	0.0193288	0.190841	0.000373601	0.0364203		0	0	0	0	3
	92	41.038	0.171512	0.0547906		-0.0547906	0.116722	0.0547906	0.116722	0.00300201	0.013624		0	0	0	0	3
	94	24.992	0.171512	0.12219		-0.12219	0.049322	0.12219	0.049322	0.0149305	0.00243266		0	0	0	0	3
	98	26.706	0.171512	0.00570118		-0.00570118	0.165811	0.00570118	0.165811	3.25034e-05	0.0274933		0	0	0	0	3
4	6	156.549	0.750514	4.67967		-4.67967	-3.92915	4.67967	3.92915	21.8993	15.4382		0	1	0	0	2
	7	129.338	3.22432	4.28643		-4.28643	-1.06211	4.28643	1.06211	18.3735	1.12808		0	0	1	0	3
	8	133.681	0.171512	0.272177		-0.272177	-0.100664	0.272177	0.100664	0.0740801	0.0101333		0	0	0	1	3
	10	114.906	0.171484	1.10182		-1.10182	-0.930331	1.10182	0.930331	1.214	0.865516		0	0	0	0	3
	12	136.205	0.171496	0.68161		-0.68161	-0.510115	0.68161	0.510115	0.464593	0.260217		0	0	0	1	3
	14	123.686	5.5152	0.64826		-0.64826	4.86694	0.64826	4.86694	0.420241	23.6872		0	0	1	0	3
	15	150.81	2.97969	-0.0640873		0.0640873	3.04378	0.0640873	3.04378	0.00410718	9.26457		0	0	0	1	3
	16	149.12	0.171512	0.336379		-0.336379	-0.164866	0.336379	0.164866	0.113151	0.0271809		0	0	0	0	3
	17	133.968	2.13773	0.242678		-0.242678	1.89505	0.242678	1.89505	0.0588926	3.5912		0	0	0	0	3
	19	143.994	0.171512	0.184095		-0.184095	-0.0125828	0.184095	0.0125828	0.033891	0.000158326		0	0	0	0	3
	20	134.257	2.18381	0.218805		-0.218805	1.96501	0.218805	1.96501	0.0478757	3.86125		0	0	0	0	3
	22	149.658	0.171512	0.48258		-0.48258	-0.311067	0.48258	0.311067	0.232883	0.0967629		0	0	0	0	3
	23	22.896	0.171512	0.225649		-0.225649	-0.0541367	0.225649	0.0541367	0.0509175	0.00293079		0	0	0	0	3
	27	23.084	0.171512	0.125578		-0.125578	0.0459341	0.125578	0.0459341	0.0157699	0.00210994		0	0	0	0	3
	31	24.118	0.171444	0.171914		-0.171914	-0.000470497	0.171914	0.000470497	0.0295544	2.21367e-07		0	0	0	0	3
	35	145.308	2.51642	0.550551		-0.550551	1.96587	0.550551	1.96587	0.303106	3.86464		0	0	0	1	3
	36	152.112	0.135974	-0.951807		0.951807	1.08778	0.951807	1.08778	0.905937	1.18327		0	0	0	0	3
	37	134.403	2.4854	0.250253		-0.250253	2.23515	0.250253	2.23515	0.0626265	4.99589		0	0	0	0	3
	39	148.234	0.171512	0.0752118		-0.0752118	0.0963005	0.0752118	0.0963005	0.00565682	0.00927379		0	0	0	0	3
	40	132.427	2.51357	0.0404344		-0.0404344	2.47314	0.0404344	2.47314	0.00163494	6.11641		0	0	0	0	3
	42	148.117	0.392036	2.54813		-2.54813	-2.1561	2.54813	2.1561	6.49297	4.64875		0	0	0	0	3
	43	20.818	0.171512	0.144861		-0.144861	0.0266516	0.144861	0.0266516	0.0209846	0.000710308		0	0	0	0	3
	47	23.157	0.171512	0.13197		-0.13197	0.0395421	0.13197	0.0395421	0.0174162	0.00156357		0	0	0	0	3
	51	21.453	0.171512	0.392569		-0.392569	-0.221056	0.392569	0.221056	0.15411	0.0488658		0	0	0	0	3
	55	157.707	0.318478	4.77139		-4.77139	-4.45291	4.77139	4.45291	22.7662	19.8284		0	1	0	0	2
	56	129.059	2.88468	4.35325		-4.35325	-1.46857	4.35325	1.46857	18.9508	2.15671		0	0	1	0	3
	57	135.999	0.171512	0.278761		-0.278761	-0.107249	0.278761	0.107249	0.0777079	0.0115024		0	0	0	1	3
	59	116.02	0.169935	1.11261		-1.11261	-0.942675	1.11261	0.942675	1.2379	0.888636		0	0	0	0	3
	61	134.731	0.171428	0.689168		-0.689168	-0.517741	0.689168	0.517741	0.474953	0.268055		0	0	0	1	3
	63	126.292	5.14366	0.649511		-0.649511	4.49415	0.649511	4.49415	0.421865	20.1974		0	0	1	0	3
	64	147.833	2.77518	-0.0669974		0.0669974	2.84218	0.0669974	2.84218	0.00448865	8.07798		0	0	0	1	3
	65	147.343	0.171512	0.480847		-0.480847	-0.309335	0.480847	0.309335	0.231214	0.0956882		0	0	0	0	3
	66	134.645	2.19345	0.218708		-0.218708	1.97474	0.218708	1.97474	0.0478333	3.89959		0	0	0	0	3
	68	143.462	0.171512	0.183564		-0.183564	-0.0120514	0.183564	0.0120514	0.0336956	0.000145235		0	0	0	0	3
	69	133.102	2.14384	0.238731		-0.238731	1.90511	0.238731	1.90511	0.0569926	3.62946		0	0	0	0	3
	71	148.531	0.171512	0.336594		-0.336594	-0.165082	0.336594	0.165082	0.113296	0.0272521		0	0	0	0	3
	72	21.836	0.171512	0.173167		-0.173167	-0.00165425	0.173167	0.00165425	0.0299867	2.73653e-06		0	0	0	0	3
	76	22.873	0.171512	0.126933		-0.126933	0.0445791	0.126933	0.0445791	0.016112	0.0019873		0	0	0	0	3
	80	21.825	0.171512	0.215739		-0.215739	-0.0442268	0.215739	0.0442268	0.0465434	0.00195601		0	0	0	0	3
	84	146.825	2.25282	0.55075		-0.55075	1.70207	0.55075	1.70207	0.303326	2.89705		0	0	0	1	3
	85	153.546	0.134229	-0.907811		0.907811	1.04204	0.907811	1.04204	0.824121	1.08585		0	0	0	0	3
	86	132.558	2.46164	0.255356		-0.255356	2.20628	0.255356	2.20628	0.0652065	4.86769		0	0	0	0	3
	88	146.402	0.171512	0.0689611		-0.0689611	0.102551	0.0689611	0.102551	0.00475564	0.0105167		0	0	0	0	3
	89	134.042	2.48123	0.03406		-0.03406	2.44717	0.03406	2.44717	0.00116008	5.98862		0	0	0	0	3
	91	148.08	0.561935	2.60807		-2.60807	-2.04614	2.60807	2.04614	6.80205	4.18669		0	0	0	0	3
	92	23.674	0.171512	0.151037		-0.151037	0.020475	0.151037	0.020475	0.0228123	0.000419224		0	0	0	0	3
	96	22.701	0.171512	0.133886		-0.133886	0.0376261	0.133886	0.0376261	0.0179255	0.00141572		0	0	0	0	3
	100	22.383	0.171512	0.406721		-0.406721	-0.235208	0.406721	0.235208	0.165422	0.055323		0	0	0	0	3
7	3	154.923	0.95609	4.05785		-4.05785	-3.10176	4.05785	3.10176	16.4661	9.6209		0	1	0	0	2
	4	152.1	0.171501	1.62894		-1.62894	-1.45744	1.62894	1.45744	2.65344	2.12412		0	0	1	0	3
	5	128.655	0.171512	0.424049		-0.424049	-0.252537	0.424049	0.252537	0.179818	0.0637749		0	0	0	1	3
	7	129.28	0.171512	0.606873		-0.606873	-0.43536	0.606873	0.43536	0.368294	0.189539		0	0	0	0	3
	9	128.708	0.171512	0.767522		-0.767522	-0.59601	0.767522	0.59601	0.58909	0.355227		0	0	0	1	3
	11	153.283	0.171512	3.0235		-3.0235	-2.85198	3.0235	2.85198	9.14154	8.13382		0	0	1	0	3
	12	31.261	0.171512	-1.17039		1.17039	1.3419	1.17039	1.3419	1.36982	1.80071		0	0	0	1	3
	14	28.285	0.171512	1.07514		-1.07514	-0.903628	1.07514	0.903628	1.15593	0.816543		0	0	0	0	3
	18	26.682	0.171512	0.268368		-0.268368	-0.0968553	0.268368	0.0968553	0.0720212	0.00938094		0	0	0	0	3
	22	32.226	0.171531	0.177351		-0.177351	-0.00582068	0.177351	0.00582068	0.0314535	3.38803e-05		0	0	0	1	3
	24	21.95	0.171512	-0.139107		0.139107	0.310619	0.139107	0.310619	0.0193507	0.0964843		0	0	0	0	3
	28	28.296	0.171512	1.07957		-1.07957	-0.908058	1.07957	0.908058	1.16547	0.82457		0	0	0	0	3
	33	155.523	0.872267	4.63292		-4.63292	-3.76066	4.63292	3.76066	21.464	14.1425		0	1	0	0	2
	34	152.162	0.171506	1.66968		-1.66968	-1.49818	1.66968	1.49818	2.78784	2.24453		0	0	1	0	3
	35	128.173	0.171512	0.408129		-0.408129	-0.236617	0.408129	0.236617	0.166569	0.0559874		0	0	0	1	3
	37	129.551	0.171512	0.576119		-0.576119	-0.404606	0.576119	0.404606	0.331913	0.163706		0	0	0	0	3
	39	127.789	0.171512	0.710589		-0.710589	-0.539077	0.710589	0.539077	0.504937	0.290604		0	0	0	1	3
	41	153.315	0.171512	2.48484		-2.48484	-2.31333	2.48484	2.31333	6.17442	5.35147		0	0	1	0	3
	42	31.876	0.171512	-0.714101		0.714101	0.885614	0.714101	0.885614	0.509941	0.784311		0	0	0	1	3
	44	25.884	0.171512	0.25045		-0.25045	-0.0789372	0.25045	0.0789372	0.062725	0.00623109		0	0	0	0	3
	48	28.366	0.171512	0.752303		-0.752303	-0.580791	0.752303	0.580791	0.56596	0.337318		0	0	0	0	3
	52	32.322	0.171584	0.0566097		-0.0566097	0.114974	0.0566097	0.114974	0.00320465	0.0132191		0	0	0	1	3
	54	29.81	0.171512	1.3072		-1.3072	-1.13569	1.3072	1.13569	1.70877	1.28978		0	0	0	0	3
	58	21.966	0.171512	-0.254833		0.254833	0.426345	0.254833	0.426345	0.0649398	0.18177		0	0	0	0	3
	62	65.034	4.10463	9.69905		-9.69905	-5.59443	9.69905	5.59443	94.0717	31.2976		0	1	0	0	2
	65	64.363	3.38594	11.3466		-11.3466	-7.96065	11.3466	7.96065	128.745	63.372		0	1	0	0	2
8	4	173.191	0.171512	0.0371521		-0.0371521	0.13436	0.0371521	0.13436	0.00138028	0.0180525		0	1	0	0	2
	5	97.215	2.79849	3.10268		-3.10268	-0.30419	3.10268	0.30419	9.62664	0.0925317		0	0	1	0	3
	7	173.735	0.171512	0.0352432		-0.0352432	0.136268	0.0352432	0.136268	0.00124209	0.018569		0	1	0	0	2
	8	25.061	1.92278	-0.227857		0.227857	2.15064	0.227857	2.15064	0.0519189	4.62525		0	0	1	0	3
	12	24.705	1.87716	-0.233912		0.233912	2.11107	0.233912	2.11107	0.0547147	4.45661		0	0	1	0	3
	16	151.95	0.411332	0.45761		-0.45761	-0.0462784	0.45761	0.0462784	0.209407	0.00214169		0	1	0	0	2
	17	151.52	0.152146	0.500234		-0.500234	-0.348088	0.500234	0.348088	0.250234	0.121165		0	0	1	0	3
	18	128.207	0.171512	0.110404		-0.110404	0.061108	0.110404	0.061108	0.0121891	0.00373418		0	0	0	1	3
	20	129.916	0.171512	0.215957		-0.215957	-0.0444446	0.215957	0.0444446	0.0466374	0.00197532		0	0	0	0	3
	22	127.965	0.171512	0.17622		-0.17622	-0.00470733	0.17622	0.00470733	0.0310534	2.21589e-05		0	0	0	1	3
	24	149.214	0.171473	0.208117		-0.208117	-0.0366432	0.208117	0.0366432	0.0433125	0.00134273		0	0	1	0	3
	25	33.313	0.171512	0.0919464		-0.0919464	0.0795659	0.0919464	0.0795659	0.00845414	0.00633074		0	0	0	1	3
	27	23.166	0.171512	0.536754		-0.536754	-0.365242	0.536754	0.365242	0.288105	0.133402		0	0	0	0	3
	31	27.004	0.171512	0.0812049		-0.0812049	0.0903074	0.0812049	0.0903074	0.00659424	0.00815543		0	0	0	0	3
	35	31.981	0.171512	0.0273604		-0.0273604	0.144152	0.0273604	0.144152	0.000748592	0.0207798		0	0	0	1	3
	37	25.51	0.171512	0.194784		-0.194784	-0.0232721	0.194784	0.0232721	0.037941	0.000541593		0	0	0	0	3
	41	27.612	0.171512	0.25225		-0.25225	-0.0807374	0.25225	0.0807374	0.0636299	0.00651852		0	0	0	0	3
	45	151.752	0.459886	0.459116		-0.459116	0.000769807	0.459116	0.000769807	0.210788	5.92603e-07		0	1	0	0	2
	46	151.151	0.156856	0.502546		-0.502546	-0.34569	0.502546	0.34569	0.252552	0.119501		0	0	1	0	3
	47	128.408	0.171512	0.11033		-0.11033	0.0611823	0.11033	0.0611823	0.0121727	0.00374327		0	0	0	1	3
	49	130.034	0.171512	0.216446		-0.216446	-0.0449341	0.216446	0.0449341	0.0468491	0.00201907		0	0	0	0	3
	51	129.782	0.171512	0.176251		-0.176251	-0.00473831	0.176251	0.00473831	0.0310643	2.24516e-05		0	0	0	1	3
	53	150.29	0.171458	0.212243		-0.212243	-0.0407844	0.212243	0.0407844	0.045047	0.00166337		0	0	1	0	3
	54	33.442	0.171512	0.0905058		-0.0905058	0.0810065	0.0905058	0.0810065	0.0081913	0.00656205		0	0	0	1	3
	56	23.367	0.171512	0.543901		-0.543901	-0.372389	0.543901	0.372389	0.295828	0.138673		0	0	0	0	3
	60	26.844	0.171512	0.0758		-0.0758	0.0957123	0.0758	0.0957123	0.00574565	0.00916084		0	0	0	0	3
	64	31.976	0.171512	0.0262323		-0.0262323	0.14528	0.0262323	0.14528	0.000688134	0.0211063		0	0	0	1	3
	66	25.784	0.171512	0.195931		-0.195931	-0.0244188	0.195931	0.0244188	0.038389	0.000596276		0	0	0	0	3
	70	28.947	0.171512	0.263616		-0.263616	-0.0921033	0.263616	0.0921033	0.0694932	0.00848302		0	0	0	0	3
	74	33.759	41.0416	56.2272		-56.2272	-15.1856	56.2272	15.1856	3161.5	230.603		1	0	0	0	1
	76	17.988	2.69084	1.61305		-1.61305	1.07779	1.61305	1.07779	2.60194	1.16163		0	1	0	0	2
	80	19.619	2.4142	1.62848		-1.62848	0.785712	1.62848	0.785712	2.65196	0.617344		0	1	0	0	2
9	6	154.701	-1.44716	-1.04857		1.04857	-0.39859	1.04857	0.39859	1.0995	0.158874		1	0	1	0	1
	7	147.677	0.170889	0.64335		-0.64335	-0.472461	0.64335	0.472461	0.413899	0.22322		0	1	0	1	2
	8	135.567	2.38302	0.200136		-0.200136	2.18288	0.200136	2.18288	0.0400543	4.76497		0	0	1	0	3
	10	144.407	0.171512	0.135626		-0.135626	0.0358865	0.135626	0.0358865	0.0183944	0.00128784		0	0	0	1	3
	11	134.475	2.22956	0.129442		-0.129442	2.10012	0.129442	2.10012	0.0167551	4.41051		0	0	1	0	3
	13	147.74	0.152363	0.365344		-0.365344	-0.212981	0.365344	0.212981	0.133476	0.0453608		0	1	0	1	2
	14	21.742	0.171278	0.17292		-0.17292	-0.00164167	0.17292	0.00164167	0.0299012	2.69509e-06		0	0	1	0	3
	18	22.279	0.171512	0.106239		-0.106239	0.0652738	0.106239	0.0652738	0.0112866	0.00426066		0	0	0	0	3
	22	29.987	0.171218	0.262811		-0.262811	-0.0915933	0.262811	0.0915933	0.0690696	0.00838932		0	0	1	0	3
	26	148.092	-0.667576	-3.48976		3.48976	2.82218	3.48976	2.82218	12.1784	7.9647		1	0	1	0	1
	27	154.044	0.142558	0.226808		-0.226808	-0.0842499	0.226808	0.0842499	0.051442	0.00709805		0	1	0	1	2
	28	137.515	2.8148	-0.143526		0.143526	2.95833	0.143526	2.95833	0.0205999	8.7517		0	0	1	0	3
	30	146.206	0.171512	0.194505		-0.194505	-0.0229932	0.194505	0.0229932	0.0378324	0.000528685		0	0	0	1	3
	31	132.861	2.46104	-0.0648604		0.0648604	2.5259	0.0648604	2.5259	0.00420687	6.38017		0	0	1	0	3
	33	152.702	0.378198	1.65906		-1.65906	-1.28086	1.65906	1.28086	2.75247	1.6406		0	1	0	1	2
	34	28.327	0.171511	0.291066		-0.291066	-0.119554	0.291066	0.119554	0.0847192	0.0142932		0	0	1	0	3
	38	22.622	0.171512	0.0803684		-0.0803684	0.0911439	0.0803684	0.0911439	0.00645908	0.00830722		0	0	0	0	3
	42	27.581	0.171512	0.347846		-0.347846	-0.176334	0.347846	0.176334	0.120997	0.0310936		0	0	1	0	3
	46	164.819	3.59717	4.98169		-4.98169	-1.38452	4.98169	1.38452	24.8173	1.9169		0	2	0	1	2
	47	123.921	0.168686	2.72529		-2.72529	-2.5566	2.72529	2.5566	7.42719	6.53621		0	0	2	0	3
	49	134.332	0.171512	0.259441		-0.259441	-0.0879288	0.259441	0.0879288	0.0673097	0.00773148		0	0	0	2	3
	51	123.1	0.171512	0.393619		-0.393619	-0.222106	0.393619	0.222106	0.154936	0.0493312		0	0	0	0	3
	53	135.033	0.171512	0.0390588		-0.0390588	0.132454	0.0390588	0.132454	0.00152559	0.0175439		0	0	0	2	3
	55	127.77	0.201731	1.33617		-1.33617	-1.13444	1.33617	1.13444	1.78535	1.28695		0	0	2	0	3
	57	165.962	6.05872	2.33121		-2.33121	3.72751	2.33121	3.72751	5.43456	13.8943		0	2	0	1	2
	58	122.452	0.592234	-3.32043		3.32043	3.91267	3.32043	3.91267	11.0253	15.309		0	0	2	0	3
	60	136.441	0.171512	-0.1685		0.1685	0.340013	0.1685	0.340013	0.0283924	0.115609		0	0	0	2	3
	62	121.263	0.171512	-0.408929		0.408929	0.580441	0.408929	0.580441	0.167223	0.336912		0	0	0	0	3
	64	135.718	0.171512	0.689347		-0.689347	-0.517834	0.689347	0.517834	0.475199	0.268152		0	0	0	2	3
	66	120.713	0.102996	3.60655		-3.60655	-3.50355	3.60655	3.50355	13.0072	12.2749		0	0	2	0	3
	68	135.89	0.424798	-7.91567		7.91567	8.34046	7.91567	8.34046	62.6578	69.5633		1	0	1	0	1
	69	154.702	0.16888	0.297104		-0.297104	-0.128224	0.297104	0.128224	0.0882709	0.0164414		0	1	0	1	2
	70	136.839	1.92426	-0.160272		0.160272	2.08454	0.160272	2.08454	0.0256871	4.34529		0	0	1	0	3
	72	148.84	0.171512	0.0896133		-0.0896133	0.0818991	0.0896133	0.0818991	0.00803053	0.00670746		0	0	0	1	3
	73	133.695	2.35865	-0.052788		0.052788	2.41144	0.052788	2.41144	0.00278657	5.81506		0	0	1	0	3
	75	153.404	0.173437	2.86555		-2.86555	-2.69211	2.86555	2.69211	8.21136	7.24746		0	1	0	1	2
	76	25.323	0.171512	0.15641		-0.15641	0.0151021	0.15641	0.0151021	0.0244642	0.000228073		0	0	1	0	3
	80	22.453	0.171512	0.103442		-0.103442	0.0680707	0.103442	0.0680707	0.0107002	0.00463363		0	0	0	0	3
	84	26.692	0.171512	0.540643		-0.540643	-0.36913	0.540643	0.36913	0.292294	0.136257		0	0	1	0	3
	88	152.53	-0.855343	-0.881855		0.881855	0.0265115	0.881855	0.0265115	0.777667	0.000702861		1	0	1	0	1
	89	149.834	0.171415	0.396733		-0.396733	-0.225318	0.396733	0.225318	0.157397	0.0507684		0	1	0	1	2
	90	134.238	2.79492	0.311265		-0.311265	2.48366	0.311265	2.48366	0.096886	6.16854		0	0	1	0	3
	92	143.548	0.171512	0.143015		-0.143015	0.0284974	0.143015	0.0284974	0.0204533	0.000812099		0	0	0	1	3
	93	133.757	3.02025	0.393752		-0.393752	2.6265	0.393752	2.6265	0.155041	6.89849		0	0	1	0	3
	95	145.165	0.156296	0.40163		-0.40163	-0.245334	0.40163	0.245334	0.161307	0.060189		0	1	0	1	2
	96	22.198	0.171464	-0.385493		0.385493	0.556957	0.385493	0.556957	0.148605	0.310201		0	0	1	0	3
	100	22.4	0.171512	0.112638		-0.112638	0.0588746	0.112638	0.0588746	0.0126873	0.00346622		0	0	0	0	3
	104	27.004	0.171507	0.0606783		-0.0606783	0.110829	0.0606783	0.110829	0.00368186	0.012283		0	0	1	0	3
10	5	122.808	2.07824	2.03232		-2.03232	0.0459178	2.03232	0.0459178	4.13032	0.00210844		1	0	0	0	1
	6	121.769	2.14212	1.85303		-1.85303	0.289094	1.85303	0.289094	3.43372	0.0835753		0	1	0	0	2
	8	117.315	1.9524	2.15063		-2.15063	-0.198224	2.15063	0.198224	4.6252	0.0392927		0	0	1	0	3
	10	121.009	1.78537	2.19309		-2.19309	-0.407722	2.19309	0.407722	4.80966	0.166237		0	1	0	0	2
	12	118.917	1.59967	1.31023		-1.31023	0.289433	1.31023	0.289433	1.71671	0.0837716		1	0	0	0	1
	14	3.93	0.170519	0.304869		-0.304869	-0.13435	0.304869	0.13435	0.0929454	0.01805		0	0	1	0	3
	18	1.2	0.147595	0.227143		-0.227143	-0.0795478	0.227143	0.0795478	0.051594	0.00632785		0	0	1	0	3
	22	122.839	2.06849	2.06061		-2.06061	0.00788918	2.06061	0.00788918	4.24609	6.22392e-05		1	0	0	0	1
	23	118.965	1.59417	1.28487		-1.28487	0.309301	1.28487	0.309301	1.65088	0.0956668		1	0	0	0	1
	25	121.166	1.77822	2.20948		-2.20948	-0.431254	2.20948	0.431254	4.88178	0.18598		0	1	0	0	2
	27	117.491	1.94101	2.1603		-2.1603	-0.219291	2.1603	0.219291	4.66692	0.0480885		0	0	1	0	3
	29	121.826	2.13858	1.87448		-1.87448	0.264103	1.87448	0.264103	3.51368	0.0697503		0	1	0	0	2
	31	3.977	0.170738	0.299062		-0.299062	-0.128325	0.299062	0.128325	0.0894383	0.0164672		0	0	1	0	3
	35	1.146	0.143675	0.239394		-0.239394	-0.0957191	0.239394	0.0957191	0.0573096	0.00916215		0	0	1	0	3
12	3	13.071	2.51637	3.01234		-3.01234	-0.495971	3.01234	0.495971	9.07421	0.245987		1	1	0	0	1
	7	13.188	2.40447	3.00197		-3.00197	-0.597506	3.00197	0.597506	9.01185	0.357014		1	1	0	0	1
	11	12.997	2.86665	2.98786		-2.98786	-0.121201	2.98786	0.121201	8.92728	0.0146897		1	1	0	0	1
13	3	14.073	1.05937	1.07082		-1.07082	-0.011443	1.07082	0.011443	1.14665	0.000130941		1	1	0	0	1
	7	14.149	1.35277	1.02989		-1.02989	0.322884	1.02989	0.322884	1.06067	0.104254		1	1	0	0	1
	11	13.942	1.43916	1.05694		-1.05694	0.382217	1.05694	0.382217	1.11712	0.14609		1	1	0	0	1
14	3	14.81	-0.354058	-2.05151		2.05151	1.69745	2.05151	1.69745	4.20869	2.88134		1	1	0	0	1
	7	14.845	-0.650516	-2.06076		2.06076	1.41024	2.06076	1.41024	4.24671	1.98878		1	1	0	0	1
	11	14.89	-0.0168253	-2.04974		2.04974	2.03291	2.04974	2.03291	4.20143	4.13274		1	1	0	0	1
17	5	25.549	2.5368	0.0624215		-0.0624215	2.47438	0.0624215	2.47438	0.00389644	6.12255		0	0	1	0	3
	11	173.081	0.170425	0.388456		-0.388456	-0.218031	0.388456	0.218031	0.150898	0.0475375		0	1	0	0	2
	12	99.653	1.89801	2.72422		-2.72422	-0.826212	2.72422	0.826212	7.42137	0.682626		0	0	1	0	3
	14	174.819	0.17141	0.437986		-0.437986	-0.266575	0.437986	0.266575	0.191831	0.0710624		0	1	0	0	2
	15	28.144	1.73693	-0.140674		0.140674	1.87761	0.140674	1.87761	0.0197892	3.52541		0	0	1	0	3
	19	155.612	0.167613	0.449719		-0.449719	-0.282106	0.449719	0.282106	0.202247	0.0795838		0	1	0	0	2
	20	151.333	0.171512	0.49987		-0.49987	-0.328357	0.49987	0.328357	0.24987	0.107819		0	0	1	0	3
	21	131.116	0.171406	0.144539		-0.144539	0.0268671	0.144539	0.0268671	0.0208915	0.000721841		0	0	0	1	3
	23	131.393	0.171512	0.305496		-0.305496	-0.133984	0.305496	0.133984	0.093328	0.0179517		0	0	0	0	3
	25	128.082	0.171512	0.131335		-0.131335	0.0401775	0.131335	0.0401775	0.0172488	0.00161423		0	0	0	1	3
[truncated: 1,117 more rows]

## Sheet: PbS58 H
Pb Benchmark set for 1H NMR (Figure S9)
[truncated: 2,066 more rows]

## Sheet: 17HAC
Evaluation of 17HAC benchmark set for 13C NMR (Table 3)
[truncated: 755 more rows]

[truncated: 1 more sheets: Bismabenzene C]
